# Supplementary material for: Romidepsin Promotes Osteogenic and Adipocytic Differentiation of Human Mesenchymal Stem Cells through Inhibition of Histondeacetylase Activity
Source: Stem Cells Int. 2018 Mar 14;2018:2379546. doi: 10.1155/2018/2379546 (PMC5872662; doi:10.1155/2018/2379546)
Supplement: Supplementary 3 — Supplementary Table 3: list of differentially expressed genes (2.0 FC, P corr < 0.05) in human mesenchymal stem cells (hMSCs) differentiated into osteoblasts (day 10) in the presence of romidepsin compared to control hMSCs. [file 2379546.f3.xlsx]

## Sheet: Sheet1
Supplementary Table 3. List of differentiatlly expressed genes (2.0 FC, p corr <0.05) in human mesenchymal stem cells (hMSCs) differentiated into osteoblasts (day 10) in the presence of Romidepsin compared to control hMSCs
ProbeName	FC ([DMSO OS D10] vs [Romidepsin OS D10])	Log FC ([DMSO OS D10] vs [Romidepsin OS D10])	FC (abs) ([DMSO OS D10] vs [Romidepsin OS D10])	Regulation ([DMSO OS D10] vs [Romidepsin OS D10])	GeneSymbol	GeneName	ControlType	Description	EntrezGeneID	Go	Chromosome End Index_Avadis_	Chromosome Number_Avadis_	Chromosome Start Index_Avadis_	Chromosome Strand_Avadis_	Cytoband	GenbankAccession	GenomicCoordinates	RefSeqAccession	UniGeneID
A_24_P333494	2.1772	1.12248	2.1772	up	FBXO42	F-box protein 42	FALSE	Homo sapiens F-box protein 42 (FBXO42), mRNA [NM_018994]	54455		16577198	chr1	16577139	-	hs|1p36.13	NM_018994	chr1:16577198-16577139	NM_018994	Hs.522384
A_23_P140602	2.1678	1.11623	2.1678	up	NGRN	neugrin, neurite outgrowth associated	FALSE	Homo sapiens neugrin, neurite outgrowth associated (NGRN), transcript variant 2, mRNA [NM_001033088]	51335	GO:0030182|GO:0005634|GO:0005576	90814532	chr15	90814473	+	hs|15q26.1	NM_001033088	chr15:90814473-90814532	NM_001033088	Hs.135471
A_24_P349039	2.26414	1.17896	2.26414	up	ARHGAP31	Rho GTPase activating protein 31	FALSE	Homo sapiens Rho GTPase activating protein 31 (ARHGAP31), mRNA [NM_020754]	57514	GO:0043547|GO:0051056|GO:0017124|GO:0007264|GO:0005925|GO:0030027|GO:0005829|GO:0005096	119136068	chr3	119136009	+	hs|3q13.33	NM_020754	chr3:119136009-119136068	NM_020754	Hs.668218
A_23_P215406	2.69895	1.4324	2.69895	up	RAC1	ras-related C3 botulinum toxin substrate 1 (rho family, small GTP binding protein Rac1)	FALSE	Homo sapiens ras-related C3 botulinum toxin substrate 1 (rho family, small GTP binding protein Rac1) (RAC1), transcript variant Rac1b, mRNA [NM_018890]	5879	GO:0005515|GO:0005802|GO:0045453|GO:0009653|GO:0031529|GO:0043552|GO:0030838|GO:0007411|GO:0021799|GO:0034446|GO:0030334|GO:0042470|GO:0017137|GO:0021831|GO:0019901|GO:0045740|GO:0030168|GO:0001891|GO:0045216|GO:0030027|GO:0030742|GO:0007186|GO:0045087|GO:0019899|GO:0038096|GO:0005925|GO:0038095|GO:0019897|GO:0030036|GO:0005886|GO:0007264|GO:0008283|GO:0005884|GO:0035025|GO:0010811|GO:0030032|GO:…	6443072	chr7	6443013	+	hs|7p22.1	NM_018890	chr7:6443013-6443072	NM_018890	Hs.413812
A_23_P120845	2.94991	1.56067	2.94991	up	XBP1	X-box binding protein 1	FALSE	Homo sapiens X-box binding protein 1 (XBP1), transcript variant 1, mRNA [NM_005080]	7494	GO:0005515|GO:0031670|GO:0006511|GO:0034976|GO:0003700|GO:0044212|GO:0006366|GO:0000981|GO:0010832|GO:0002020|GO:0042993|GO:0030968|GO:0045348|GO:0051602|GO:0031625|GO:0042632|GO:0032869|GO:0000977|GO:0046982|GO:0019901|GO:0006990|GO:0001047|GO:0000122|GO:0014065|GO:0031490|GO:0001889|GO:0045600|GO:0016049|GO:0005654|GO:0006987|GO:0044267|GO:0001158|GO:0010508|GO:0035924|GO:0032008|GO:0005783|GO:…	29190792	chr22	29190733	-	hs|22q12.1	NM_005080	chr22:29190792-29190733	NM_005080	Hs.437638
A_33_P3417950	2.00747	1.00538	2.00747	up	AKAP8	A kinase (PRKA) anchor protein 8	FALSE	Homo sapiens A kinase (PRKA) anchor protein 8 (AKAP8), mRNA [NM_005858]	10270	GO:0034237|GO:0000793|GO:0007076|GO:0005794|GO:0005634|GO:0016363|GO:0005739|GO:0007165|GO:0007067|GO:0001939|GO:0003690|GO:0016020|GO:0005654|GO:0008270	15464414	chr19	15464355	-	hs|19p13.12	NM_005858	chr19:15464414-15464355	NM_005858	Hs.594496
A_33_P3252394	3.51213	1.81235	3.51213	up	GADD45G	growth arrest and DNA-damage-inducible, gamma	FALSE	Homo sapiens growth arrest and DNA-damage-inducible, gamma (GADD45G), mRNA [NM_006705]	10912	GO:0005515|GO:0043065|GO:0006950|GO:0046330|GO:0006915|GO:0005634|GO:0007275|GO:0030154|GO:0000186|GO:0005737|GO:0000185|GO:1900745|GO:0051726|GO:0006469	92221459	chr9	92221400	+	hs|9q22.2	NM_006705	chr9:92221400-92221459	NM_006705	Hs.9701
A_23_P146497	2.381	1.25157	2.381	up	PPP1R26	protein phosphatase 1, regulatory subunit 26	FALSE	Homo sapiens protein phosphatase 1, regulatory subunit 26 (PPP1R26), mRNA [NM_014811]	9858	GO:0005515|GO:0019902|GO:0010923|GO:0004864|GO:0005730|GO:0005654	138380340	chr9	138380281	+	hs|9q34.3	NM_014811	chr9:138380281-138380340	NM_014811	Hs.533260
A_23_P116898	2.29959	1.20138	2.29959	up	A2M	alpha-2-macroglobulin	FALSE	Homo sapiens alpha-2-macroglobulin (A2M), mRNA [NM_000014]	2	GO:0005515|GO:0007264|GO:0004867|GO:0072562|GO:0002020|GO:0019959|GO:0005829|GO:0019966|GO:0019838|GO:0022617|GO:0030198|GO:0031093|GO:0070062|GO:0001869|GO:0051056|GO:0043120|GO:0005102|GO:0030168|GO:0005576|GO:0010951|GO:0048863|GO:0007596|GO:0007597|GO:0002576|GO:0019899|GO:0048306	9221418	chr12	9221359	-	hs|12p13.31	NM_000014	chr12:9221418-9221359	NM_000014	Hs.212838
A_22_P00015397	4.14809	2.05245	4.14809	up	lnc-SRP54-1	lnc-SRP54-1:1	FALSE	Homo sapiens cDNA clone IMAGE:4823416. [BC039097]			35345665	chr14	35345606	+	hs|14q13.2	BC039097	chr14:35345606-35345665
A_23_P104583	2.16319	1.11316	2.16319	up	CORO1B	coronin, actin binding protein, 1B	FALSE	Homo sapiens coronin, actin binding protein, 1B (CORO1B), transcript variant 1, mRNA [NM_020441]	57175	GO:0005515|GO:0090135|GO:0001725|GO:0035767|GO:0030036|GO:0005886|GO:2000394|GO:0005884|GO:0034316|GO:0071933|GO:0015629|GO:0030027|GO:0031529|GO:0042802|GO:0005737|GO:0051015|GO:0016477|GO:0042060|GO:0051017|GO:0005925|GO:0031252|GO:0070062	67207834	chr11	67207704	-	hs|11q13.2	NM_020441	chr11:67207834-67207704	NM_020441	Hs.6191
A_23_P118392	4.52742	2.17869	4.52742	up	RASD1	RAS, dexamethasone-induced 1	FALSE	Homo sapiens RAS, dexamethasone-induced 1 (RASD1), transcript variant 1, mRNA [NM_016084]	51655	GO:0006184|GO:0007165|GO:0048471|GO:0007263|GO:0007186|GO:0005886|GO:0007264|GO:0003924|GO:0005634|GO:0005525|GO:0045892	17397846	chr17	17397787	-	hs|17p11.2	NM_016084	chr17:17397846-17397787	NM_016084	Hs.25829
A_23_P137532	2.16036	1.11127	2.16036	up	PLOD1	procollagen-lysine, 2-oxoglutarate 5-dioxygenase 1	FALSE	Homo sapiens procollagen-lysine, 2-oxoglutarate 5-dioxygenase 1 (PLOD1), mRNA [NM_000302]	5351	GO:0001666|GO:0031418|GO:0005506|GO:0008475|GO:0042803|GO:0008544|GO:0030198|GO:0030867|GO:0005789|GO:0046947|GO:0006464|GO:0055114|GO:0070062	12035006	chr1	12034947	+	hs|1p36.22	NM_000302	chr1:12034947-12035006	NM_000302	Hs.75093
A_23_P37702	4.17716	2.06252	4.17716	up	TPSAB1	tryptase alpha/beta 1	FALSE	Homo sapiens tryptase alpha/beta 1 (TPSAB1), mRNA [NM_003294]	7177	GO:0031012|GO:0005515|GO:0022617|GO:0004252|GO:0030198|GO:0006508|GO:0008236|GO:0006952|GO:0005576|GO:0005615	1291930	chr16	1291871	+	hs|16p13.3	NM_003294	chr16:1291871-1291930	NM_003294	Hs.405479
A_23_P102937	2.11317	1.07941	2.11317	up	SUMO3	small ubiquitin-like modifier 3	FALSE	Homo sapiens small ubiquitin-like modifier 3 (SUMO3), transcript variant 1, mRNA [NM_006936]	6612	GO:0005515|GO:0034504|GO:0016925|GO:0005634|GO:0005737|GO:2000060|GO:0016605|GO:0019789|GO:0000776|GO:0005654|GO:0044267|GO:0043687|GO:0070062	46225999	chr21	46225940	-	hs|21q22.3	NM_006936	chr21:46225999-46225940	NM_006936	Hs.474005
A_33_P3397763	2.97434	1.57257	2.97434	up	TNFSF9	tumor necrosis factor (ligand) superfamily, member 9	FALSE	Homo sapiens tumor necrosis factor (ligand) superfamily, member 9 (TNFSF9), mRNA [NM_003811]	8744	GO:0032755|GO:0032729|GO:0005164|GO:0005886|GO:0008283|GO:0005102|GO:0007267|GO:0006915|GO:0032735|GO:0005125|GO:0005615|GO:0042104|GO:0007165|GO:0006955|GO:0043011|GO:0016021|GO:0045585	6535925	chr19	6535866	+	hs|19p13.3	NM_003811	chr19:6535866-6535925	NM_003811	Hs.1524
A_23_P126623	2.25645	1.17406	2.25645	up	PGD	phosphogluconate dehydrogenase	FALSE	Homo sapiens phosphogluconate dehydrogenase (PGD), mRNA [NM_002631]	5226	GO:0050661|GO:0005975|GO:0019521|GO:0005634|GO:0044281|GO:0006098|GO:0009051|GO:0005829|GO:0004616|GO:0019322|GO:0009405|GO:0055114|GO:0070062	10478970	chr1	10478911	+	hs|1p36.22	NM_002631	chr1:10478911-10478970	NM_002631	Hs.464071
A_33_P3397418	3.58722	1.84286	3.58722	up	ZC3HAV1	zinc finger CCCH-type, antiviral 1	FALSE	Homo sapiens zinc finger CCCH-type, antiviral 1 (ZC3HAV1), transcript variant 1, mRNA [NM_020119]	56829	GO:0005515|GO:0032728|GO:0005794|GO:0032727|GO:1900246|GO:0005634|GO:0009615|GO:0046872|GO:0003950|GO:0051607|GO:0005737|GO:0045087|GO:0008152|GO:0061014|GO:0043123|GO:0045071	138728410	chr7	138728351	-	hs|7q34	NM_020119	chr7:138728410-138728351	NM_020119	Hs.133512
A_23_P79911	2.7802	1.47519	2.7802	up	PSMF1	proteasome (prosome, macropain) inhibitor subunit 1 (PI31)	FALSE	Homo sapiens proteasome (prosome, macropain) inhibitor subunit 1 (PI31) (PSMF1), transcript variant 1, mRNA [NM_006814]	9491	GO:0005515|GO:0006511|GO:0002474|GO:0010467|GO:0004866|GO:0005783|GO:0090263|GO:0044281|GO:0031145|GO:0005829|GO:0034641|GO:0005737|GO:0000082|GO:0016032|GO:0090090|GO:0006977|GO:0000209|GO:0005839|GO:0043066|GO:0006521|GO:0051437|GO:0042590|GO:0006915|GO:0042981|GO:0051436|GO:0051439|GO:0010951|GO:0016020|GO:0070628|GO:0002479|GO:0005654|GO:0000278	1147777	chr20	1147718	+	hs|20p13	NM_006814	chr20:1147718-1147777	NM_006814	Hs.471917
A_23_P81399	3.84835	1.94424	3.84835	up	SQSTM1	sequestosome 1	FALSE	Homo sapiens sequestosome 1 (SQSTM1), transcript variant 1, mRNA [NM_003900]	8878	GO:0005515|GO:0043130|GO:0006511|GO:0005783|GO:0046578|GO:0051291|GO:0005764|GO:0042803|GO:0030154|GO:0042802|GO:0005829|GO:0035556|GO:0005737|GO:0008104|GO:0000932|GO:0045944|GO:0005080|GO:0016197|GO:0043122|GO:0042169|GO:0070530|GO:0070062|GO:0016239|GO:0030971|GO:0048011|GO:0043066|GO:0043065|GO:0005776|GO:0019901|GO:0016235|GO:0005770|GO:0016234|GO:0016236|GO:0006914|GO:0006950|GO:0031410|GO:…	179263768	chr5	179263709	+	hs|5q35.3	NM_003900	chr5:179263709-179263768	NM_003900	Hs.724025
A_22_P00010650	2.93	1.5509	2.93	up			FALSE	Homo sapiens mannosidase, alpha, class 2C, member 1, mRNA (cDNA clone IMAGE:4329693), partial cds. [BC010081]			75661654	chr15	75661595	+	hs|15q24.2	BC010081	chr15:75661595-75661654		Hs.598731
A_23_P388993	2.56818	1.36075	2.56818	up	ZC3H12C	zinc finger CCCH-type containing 12C	FALSE	Homo sapiens zinc finger CCCH-type containing 12C (ZC3H12C), mRNA [NM_033390]	85463	GO:0008150|GO:0003674|GO:0004519|GO:0090305|GO:0005575|GO:0046872	110042272	chr11	110042213	+	hs|11q22.3	NM_033390	chr11:110042213-110042272	NM_033390	Hs.376289
A_32_P224850	2.14568	1.10144	2.14568	up	LOC101927764	uncharacterized LOC101927764	FALSE	PREDICTED: Homo sapiens uncharacterized LOC101927764 (LOC101927764), transcript variant X4, ncRNA [XR_425464]	101927764		120480892	chr2	120480833	-	hs|2q14.2	XR_425464	chr2:120480892-120480833	XR_425464
A_23_P110167	2.42947	1.28064	2.42947	up	MGST2	microsomal glutathione S-transferase 2	FALSE	Homo sapiens microsomal glutathione S-transferase 2 (MGST2), transcript variant 1, mRNA [NM_002413]	4258	GO:0019370|GO:0006805|GO:0005886|GO:0010243|GO:0044281|GO:0005635|GO:0043085|GO:0004364|GO:0004464|GO:0043231|GO:0004602|GO:0006750|GO:0005789|GO:0032496|GO:0016021|GO:0008047|GO:0055114	140625315	chr4	140625256	+	hs|4q31.1	NM_002413	chr4:140625256-140625315	NM_002413	Hs.81874
A_24_P133905	4.63538	2.21269	4.63538	up	CCL23	chemokine (C-C motif) ligand 23	FALSE	Homo sapiens chemokine (C-C motif) ligand 23 (CCL23), transcript variant CKbeta8, mRNA [NM_005064]	6368	GO:0008009|GO:0008285|GO:0006874|GO:0007267|GO:0005576|GO:0005615|GO:0002548|GO:0031726|GO:0007165|GO:0006955|GO:0006954|GO:0006935|GO:0007186|GO:2001264|GO:0008201	34340165	chr17	34340106	-	hs|17q12	NM_005064	chr17:34340165-34340106	NM_005064	Hs.169191
A_23_P320739	2.39615	1.26072	2.39615	up	MEF2C	myocyte enhancer factor 2C	FALSE	Homo sapiens myocyte enhancer factor 2C (MEF2C), transcript variant 1, mRNA [NM_002397]	4208	GO:0005515|GO:0003700|GO:0000983|GO:0006366|GO:0000981|GO:0003139|GO:0003185|GO:0003138|GO:0001947|GO:0007507|GO:0002756|GO:0014033|GO:0002062|GO:0000165|GO:0002755|GO:0007611|GO:0002467|GO:0014902|GO:0030501|GO:0000977|GO:0034134|GO:0001205|GO:0000122|GO:0007521|GO:0002224|GO:0000978|GO:0001649|GO:0001958|GO:0007517|GO:0007519|GO:0002931|GO:0010694|GO:0000980|GO:0005654|GO:0001782|GO:0030890|GO:…	88016876	chr5	88016817	-	hs|5q14.3	NM_002397	chr5:88016876-88016817	NM_002397	Hs.649965
A_23_P109034	2.90134	1.53672	2.90134	up	SDC4	syndecan 4	FALSE	Homo sapiens syndecan 4 (SDC4), mRNA [NM_002999]	6385	GO:0005515|GO:0001657|GO:0007603|GO:0005886|GO:0044281|GO:0051894|GO:0030198|GO:0005080|GO:0045860|GO:0001968|GO:0030204|GO:0030203|GO:0070062|GO:0043202|GO:0009986|GO:0005975|GO:0005796|GO:0006027|GO:0001523|GO:0006024|GO:0008150|GO:0005887|GO:0051496|GO:0009405|GO:0043034|GO:0045121|GO:0005925|GO:0070053	43954637	chr20	43954578	-	hs|20q13.12	NM_002999	chr20:43954637-43954578	NM_002999	Hs.632267
A_23_P95302	2.21377	1.1465	2.21377	up	RFC5	replication factor C (activator 1) 5, 36.5kDa	FALSE	Homo sapiens replication factor C (activator 1) 5, 36.5kDa (RFC5), transcript variant 2, mRNA [NM_181578]	5985	GO:0005515|GO:0003689|GO:0005634|GO:0005524|GO:0006260|GO:0006261|GO:0006271|GO:0006281|GO:0000723|GO:0006283|GO:0000722|GO:0006297|GO:0005654|GO:0005663|GO:0006289|GO:0019899|GO:0000278|GO:0032201	118469833	chr12	118469774	+	hs|12q24.23	NM_181578	chr12:118469774-118469833	NM_181578	Hs.731908
A_33_P3339173	2.19456	1.13393	2.19456	up	SRP9	signal recognition particle 9kDa	FALSE	Homo sapiens signal recognition particle 9kDa (SRP9), transcript variant 1, mRNA [NM_001130440]	6726	GO:0005786|GO:0010467|GO:0005785|GO:0006614|GO:0003723|GO:0008312|GO:0005047|GO:0044267|GO:0006412|GO:0070062|GO:0045900|GO:0005829	225977302	chr1	225977243	+	hs|1q42.12	NM_001130440	chr1:225977243-225977302	NM_001130440	Hs.706900
A_33_P3347241	2.21319	1.14613	2.21319	up	ANKRD20A12P	ankyrin repeat domain 20 family, member A12, pseudogene	FALSE	Homo sapiens ankyrin repeat domain 20 family, member A12, pseudogene (ANKRD20A12P), non-coding RNA [NR_046228]	100874392		142697765	chr1	142697706	-	hs|1q21.1	NR_046228	chr1:142697765-142697706	NR_046228	Hs.648245
A_33_P3332547	3.77288	1.91567	3.77288	up	IQCJ-SCHIP1	IQCJ-SCHIP1 readthrough	FALSE	Homo sapiens IQCJ-SCHIP1 readthrough (IQCJ-SCHIP1), transcript variant 1, mRNA [NM_001197113]	100505385		159606731	chr3	159606672	+	hs|3q25.33	NM_001197113	chr3:159606672-159606731	NM_001197113	Hs.134665
A_24_P129632	3.15105	1.65583	3.15105	up	DLG5	discs, large homolog 5 (Drosophila)	FALSE	Homo sapiens discs, large homolog 5 (Drosophila) (DLG5), mRNA [NM_004747]	9231	GO:0005515|GO:0008092|GO:0008285|GO:0005886|GO:0008013|GO:0045186|GO:0030159|GO:0045176|GO:0042981|GO:0072205|GO:0045197|GO:0035556|GO:0007165|GO:0005737|GO:0016337|GO:0060441|GO:0005913|GO:0006461|GO:0030859|GO:0071896|GO:0030901	79550783	chr10	79550724	-	hs|10q22.3	NM_004747	chr10:79550783-79550724	NM_004747	Hs.652690
A_23_P122041	2.51626	1.33128	2.51626	up	PPP2CA	protein phosphatase 2, catalytic subunit, alpha isozyme	FALSE	Homo sapiens protein phosphatase 2, catalytic subunit, alpha isozyme (PPP2CA), mRNA [NM_002715]	5515	GO:0005515|GO:0008380|GO:0010467|GO:0030308|GO:0010469|GO:0071902|GO:0030111|GO:0005886|GO:0006672|GO:0000159|GO:0005634|GO:0050811|GO:0010719|GO:0030155|GO:0046872|GO:0005829|GO:0070208|GO:0005739|GO:0000188|GO:0031952|GO:0006470|GO:0000184|GO:0015630|GO:0046983|GO:0004722|GO:0006275|GO:0070062|GO:0042518|GO:0051321|GO:0006355|GO:0010033|GO:0042176|GO:0007084|GO:0006915|GO:0008022|GO:0000922|GO:…	133533156	chr5	133533097	-	hs|5q31.1	NM_002715	chr5:133533156-133533097	NM_002715	Hs.105818
A_23_P103070	2.25598	1.17375	2.25598	up	YWHAH	tyrosine 3-monooxygenase/tryptophan 5-monooxygenase activation protein, eta	FALSE	Homo sapiens tyrosine 3-monooxygenase/tryptophan 5-monooxygenase activation protein, eta (YWHAH), mRNA [NM_003405]	7533	GO:0005515|GO:0086010|GO:0005886|GO:0005159|GO:0035259|GO:0006886|GO:0005829|GO:0005737|GO:1900740|GO:0014704|GO:0048167|GO:0061024|GO:0030659|GO:0070062|GO:0006713|GO:0046982|GO:0019904|GO:0006915|GO:0003779|GO:2000649|GO:0097193|GO:0044325|GO:0021762|GO:0042921|GO:0002028|GO:0045664|GO:0050774|GO:0019899|GO:0045893|GO:0017080	32353197	chr22	32353138	+	hs|22q12.3	NM_003405	chr22:32353138-32353197	NM_003405	Hs.226755
A_23_P106859	2.49018	1.31625	2.49018	up	EMC8	ER membrane protein complex subunit 8	FALSE	Homo sapiens ER membrane protein complex subunit 8 (EMC8), transcript variant 1, mRNA [NM_006067]	10328	GO:0072546|GO:0005739|GO:0005737|GO:0016020|GO:0005634	85813076	chr16	85813017	-	hs|16q24.1	NM_006067	chr16:85813076-85813017	NM_006067	Hs.173162
A_33_P3424462	2.35109	1.23333	2.35109	up	CNST	consortin, connexin sorting protein	FALSE	Homo sapiens consortin, connexin sorting protein (CNST), transcript variant 2, mRNA [NM_001139459]	163882	GO:0030133|GO:0005802|GO:0005515|GO:0043234|GO:0016020|GO:0005886|GO:0019902|GO:0042998|GO:0010923|GO:0016021|GO:0071253	246811470	chr1	246811411	+	hs|1q44	NM_001139459	chr1:246811411-246811470	NM_001139459	Hs.368353
A_23_P412577	2.68736	1.42619	2.68736	up	ANKRD29	ankyrin repeat domain 29	FALSE	Homo sapiens ankyrin repeat domain 29 (ANKRD29), mRNA [NM_173505]	147463		21180440	chr18	21180381	-	hs|18q11.2	NM_173505	chr18:21180440-21180381	NM_173505	Hs.374774
A_23_P209269	2.08376	1.05919	2.08376	up	PPM1B	protein phosphatase, Mg2+/Mn2+ dependent, 1B	FALSE	Homo sapiens protein phosphatase, Mg2+/Mn2+ dependent, 1B (PPM1B), transcript variant 5, mRNA [NM_001033557]	5495	GO:0005515|GO:0050687|GO:0042347|GO:0000287|GO:0030145|GO:0019221|GO:0005829|GO:0006470|GO:0035970|GO:0016020|GO:0004722|GO:0006499|GO:0032688|GO:0043124	44458448	chr2	44458389	+	hs|2p21	NM_001033557	chr2:44458389-44458448	NM_001033557	Hs.416769
A_22_P00011670	2.04329	1.03089	2.04329	up	LINC00271	long intergenic non-protein coding RNA 271	FALSE	Homo sapiens long intergenic non-protein coding RNA 271 (LINC00271), long non-coding RNA [NR_026805]	100131814		135819138	chr6	135819079	+	hs|6q23.3	NR_026805	chr6:135819079-135819138	NR_026805	Hs.734007
A_24_P132039	2.54946	1.35019	2.54946	up	RNF14	ring finger protein 14	FALSE	Homo sapiens ring finger protein 14 (RNF14), transcript variant 1, mRNA [NM_004290]	9604	GO:0005515|GO:0006355|GO:0016567|GO:0006357|GO:0016874|GO:0003713|GO:0060765|GO:0005634|GO:0050681|GO:0006351|GO:0007165|GO:0005737|GO:0019787|GO:0008270|GO:0045893|GO:0032355|GO:0030521	141368156	chr5	141368097	+	hs|5q31.3	NM_004290	chr5:141368097-141368156	NM_004290	Hs.483616
A_23_P16523	3.43867	1.78185	3.43867	up	GDF15	growth differentiation factor 15	FALSE	Homo sapiens growth differentiation factor 15 (GDF15), mRNA [NM_004864]	9518	GO:0007267|GO:0010862|GO:0005576|GO:0042981|GO:0005125|GO:0005160|GO:0005615|GO:0060395|GO:0007165|GO:0043408|GO:0007179|GO:0048468|GO:0008083|GO:0070062	18499949	chr19	18499890	+	hs|19p13.11	NM_004864	chr19:18499890-18499949	NM_004864	Hs.616962
A_24_P393461	2.02023	1.01452	2.02023	up	C1orf43	chromosome 1 open reading frame 43	FALSE	Homo sapiens chromosome 1 open reading frame 43 (C1orf43), transcript variant 2, mRNA [NM_138740]	25912	GO:0050662|GO:0016021|GO:0055114|GO:0016616	154185028	chr1	154184969	-	hs|1q21.3	NM_138740	chr1:154185028-154184969	NM_138740	Hs.287471
A_23_P377819	2.35305	1.23453	2.35305	up	SRSF5	serine/arginine-rich splicing factor 5	FALSE	Homo sapiens serine/arginine-rich splicing factor 5 (SRSF5), transcript variant 1, mRNA [NM_001039465]	6430	GO:0005515|GO:0006397|GO:0008380|GO:0010467|GO:0006369|GO:0006366|GO:0006376|GO:0031124|GO:0009611|GO:0005730|GO:0005634|GO:0050733|GO:0005737|GO:0006406|GO:0016607|GO:0000166|GO:0000398|GO:0051726|GO:0005654	70238192	chr14	70238133	+	hs|14q24.2	NM_001039465	chr14:70238133-70238192	NM_001039465	Hs.632326
A_32_P47754	2.71675	1.44188	2.71675	up	SLC2A14	solute carrier family 2 (facilitated glucose transporter), member 14	FALSE	Homo sapiens solute carrier family 2 (facilitated glucose transporter), member 14 (SLC2A14), transcript variant 1, mRNA [NM_001286233]	144195	GO:0015758|GO:0007275|GO:0005634|GO:0016021|GO:0007283|GO:0055085|GO:0030154|GO:0005355	7965262	chr12	7965203	-	hs|12p13.31	NM_001286233	chr12:7965262-7965203	NM_001286233	Hs.655169
A_23_P94338	2.20229	1.139	2.20229	up	ENPP2	ectonucleotide pyrophosphatase/phosphodiesterase 2	FALSE	Homo sapiens ectonucleotide pyrophosphatase/phosphodiesterase 2 (ENPP2), transcript variant 1, mRNA [NM_006209]	5168	GO:0005886|GO:0090305|GO:0004551|GO:0006928|GO:0006796|GO:0005615|GO:0006955|GO:0004528|GO:0006935|GO:0004622|GO:0047391|GO:0005044|GO:0030334|GO:0005509|GO:0045765|GO:0003676|GO:0006898|GO:0007186|GO:0016787|GO:0005887|GO:0008270|GO:0030247|GO:0034638|GO:0009395|GO:0008134	120581567	chr8	120581508	-	hs|8q24.12	NM_006209	chr8:120581567-120581508	NM_006209	Hs.190977
A_33_P3367301	2.55032	1.35068	2.55032	up	GJD3	gap junction protein, delta 3, 31.9kDa	FALSE	Homo sapiens gap junction protein, delta 3, 31.9kDa (GJD3), mRNA [NM_152219]	125111	GO:0005515|GO:0005243|GO:0034220|GO:0007154|GO:0009986|GO:0005887|GO:0005922|GO:0016264|GO:0005216|GO:0009749	38516987	chr17	38516928	-	hs|17q21.2	NM_152219	chr17:38516987-38516928	NM_152219	Hs.444663
A_23_P112412	2.18533	1.12785	2.18533	up	TEX10	testis expressed 10	FALSE	Homo sapiens testis expressed 10 (TEX10), transcript variant 1, mRNA [NM_017746]	54881	GO:0005515|GO:0031965|GO:0005737|GO:0071339|GO:0005730|GO:0016021	103064570	chr9	103064511	-	hs|9q31.1	NM_017746	chr9:103064570-103064511	NM_017746	Hs.494648
A_24_P125335	4.81658	2.26801	4.81658	up	CCL13	chemokine (C-C motif) ligand 13	FALSE	Homo sapiens chemokine (C-C motif) ligand 13 (CCL13), mRNA [NM_005408]	6357	GO:0008009|GO:0007165|GO:0006955|GO:0006954|GO:0006935|GO:0008360|GO:0007010|GO:0048245|GO:0007267|GO:0006874|GO:0005102|GO:0005615	32685365	chr17	32685309	+	hs|17q12	NM_005408	chr17:32685309-32685365	NM_005408	Hs.414629
A_23_P200780	2.05322	1.03789	2.05322	up	TGFBR3	transforming growth factor, beta receptor III	FALSE	Homo sapiens transforming growth factor, beta receptor III (TGFBR3), transcript variant 1, mRNA [NM_003243]	7049	GO:0005515|GO:0055010|GO:0050680|GO:0046332|GO:0005615|GO:0005114|GO:0034695|GO:0007179|GO:0032354|GO:0070062|GO:0009986|GO:0017134|GO:0043393|GO:0030509|GO:0030165|GO:0005160|GO:0060038|GO:0060347|GO:0001889|GO:0043235|GO:0007181|GO:0005887|GO:0016049|GO:0060389|GO:0009897|GO:0005783|GO:0031100|GO:0010719|GO:0001837|GO:0005539|GO:0034673|GO:0035556|GO:0060317|GO:0060318|GO:0006955|GO:0051092|GO:…	92148947	chr1	92148888	-	hs|1p22.1	NM_003243	chr1:92148947-92148888	NM_003243	Hs.482390
A_23_P118158	3.17061	1.66476	3.17061	up	HS3ST2	heparan sulfate (glucosamine) 3-O-sulfotransferase 2	FALSE	Homo sapiens heparan sulfate (glucosamine) 3-O-sulfotransferase 2 (HS3ST2), mRNA [NM_006043]	9956	GO:0000139|GO:0005975|GO:0009405|GO:0008146|GO:0033871|GO:0007623|GO:0044281|GO:0016021|GO:0030203|GO:0006024	22927252	chr16	22927193	+	hs|16p12.2	NM_006043	chr16:22927193-22927252	NM_006043	Hs.115830
A_19_P00322533	3.6324	1.86092	3.6324	up	CRNDE	colorectal neoplasia differentially expressed (non-protein coding)	FALSE	Homo sapiens colorectal neoplasia differentially expressed (non-protein coding) (CRNDE), transcript variant 3, long non-coding RNA [NR_110453]	643911		54954269	chr16	54954210	-	hs|16q12.2	NR_110453	chr16:54954269-54954210	NR_110453	Hs.237396
A_21_P0000856	2.16178	1.11222	2.16178	up	IL10RB-AS1	IL10RB antisense RNA 1 (head to head)	FALSE	Homo sapiens IL10RB antisense RNA 1 (head to head) (IL10RB-AS1), long non-coding RNA [NR_038974]	100288432		34637999	chr21	34637940	-	hs|21q22.11	NR_038974	chr21:34637999-34637940	NR_038974	Hs.709795
A_33_P3235004	2.03692	1.02639	2.03692	up	MYH10	myosin, heavy chain 10, non-muscle	FALSE	Homo sapiens myosin, heavy chain 10, non-muscle (MYH10), transcript variant 1, mRNA [NM_001256012]	4628	GO:0005515|GO:0005516|GO:0031594|GO:0060041|GO:0042641|GO:0008360|GO:0031032|GO:0006887|GO:0007512|GO:0051015|GO:0007411|GO:0043025|GO:0050885|GO:0055003|GO:0005938|GO:0070062|GO:0000281|GO:0005819|GO:0030496|GO:0001701|GO:0030027|GO:0043531|GO:0021592|GO:0055015|GO:0030424|GO:0006200|GO:0005886|GO:0008283|GO:0007097|GO:0005634|GO:0016459|GO:0015629|GO:0030898|GO:0032154|GO:0021678|GO:0030426|GO:…	8377599	chr17	8377540	-	hs|17p13.1	NM_001256012	chr17:8377599-8377540	NM_001256012	Hs.16355
A_24_P287473	2.90097	1.53654	2.90097	up	SAV1	salvador family WW domain containing protein 1	FALSE	Homo sapiens salvador family WW domain containing protein 1 (SAV1), mRNA [NM_021818]	60485	GO:0005515|GO:0060044|GO:0043065|GO:0060412|GO:0050680|GO:0005634|GO:0035329|GO:2000036|GO:0005829|GO:0060575|GO:0005737|GO:0030216|GO:0060487|GO:0001942	51100478	chr14	51100419	-	hs|14q22.1	NM_021818	chr14:51100478-51100419	NM_021818	Hs.642842
A_23_P419795	3.16255	1.66109	3.16255	up	SBF2	SET binding factor 2	FALSE	Homo sapiens SET binding factor 2 (SBF2), mRNA [NM_030962]	81846	GO:0005515|GO:0005774|GO:0017112|GO:0051262|GO:0019902|GO:0042552|GO:0032851|GO:0042803|GO:0016791|GO:0019208|GO:0016020|GO:0016311|GO:0035091	9800909	chr11	9800850	-	hs|11p15.4	NM_030962	chr11:9800909-9800850	NM_030962	Hs.577252
A_32_P131367	2.68742	1.42622	2.68742	up	RNF13	ring finger protein 13	FALSE	Homo sapiens ring finger protein 13 (RNF13), transcript variant 1, mRNA [NM_007282]	11342	GO:0005515|GO:0004842|GO:0000139|GO:0016874|GO:0031902|GO:0005789|GO:0005637|GO:0008270|GO:0016021|GO:0005765|GO:0051865	149638952	chr3	149629843	+	hs|3q25.1	NM_007282	chr3:149629843-149638952	NM_007282	Hs.12333
A_24_P406986	2.14683	1.10221	2.14683	up	SLC43A3	solute carrier family 43, member 3	FALSE	Homo sapiens solute carrier family 43, member 3 (SLC43A3), transcript variant 3, mRNA [NM_199329]	29015	GO:0008150|GO:0003674|GO:0016021|GO:0005575|GO:0055085	57176654	chr11	57175317	-	hs|11q12.1	NM_199329	chr11:57176654-57175317	NM_199329	Hs.99962
A_33_P3385870	2.44194	1.28803	2.44194	up	CCNG2	cyclin G2	FALSE	Homo sapiens cyclin G2 (CCNG2), mRNA [NM_004354]	901	GO:0007067|GO:0005737|GO:0051726|GO:0000075|GO:0051301	78087216	chr4	78087157	+	hs|4q21.1	NM_004354	chr4:78087157-78087216	NM_004354	Hs.740456
A_23_P342053	3.0932	1.6291	3.0932	up	RBBP6	retinoblastoma binding protein 6	FALSE	Homo sapiens retinoblastoma binding protein 6 (RBBP6), transcript variant 3, mRNA [NM_032626]	5930	GO:0005515|GO:0004842|GO:0005815|GO:0005694|GO:0016874|GO:0005730|GO:0001701|GO:0061053|GO:0005737|GO:0035264|GO:0042787|GO:0048568|GO:0005654|GO:0008270	24560286	chr16	24557545	+	hs|16p12.1	NM_032626	chr16:24557545-24560286	NM_032626	Hs.188553
A_23_P58482	2.63786	1.39937	2.63786	up	MGAT1	mannosyl (alpha-1,3-)-glycoprotein beta-1,2-N-acetylglucosaminyltransferase	FALSE	Homo sapiens mannosyl (alpha-1,3-)-glycoprotein beta-1,2-N-acetylglucosaminyltransferase (MGAT1), transcript variant 2, mRNA [NM_002406]	4245	GO:0008375|GO:0003827|GO:0005975|GO:0001701|GO:0006049|GO:0031982|GO:0046872|GO:0000139|GO:0016020|GO:0006486|GO:0016021|GO:0044267|GO:0070062|GO:0018279|GO:0043687	180218078	chr5	180218019	-	hs|5q35.3	NM_002406	chr5:180218078-180218019	NM_002406	Hs.519818
A_23_P46429	3.74367	1.90445	3.74367	up	CYR61	cysteine-rich, angiogenic inducer, 61	FALSE	Homo sapiens cysteine-rich, angiogenic inducer, 61 (CYR61), mRNA [NM_001554]	3491	GO:0044319|GO:0060710|GO:0060591|GO:0003181|GO:0008283|GO:0010811|GO:0007267|GO:0003281|GO:0002041|GO:0001558|GO:0009653|GO:0030513|GO:0006935|GO:0030198|GO:0045944|GO:0045860|GO:0060716|GO:0060548|GO:0007155|GO:0033690|GO:0070372|GO:0008201|GO:0005520|GO:0003278|GO:0043066|GO:2000304|GO:0030335|GO:0060413|GO:0072593|GO:0050840|GO:0005578|GO:0010518|GO:0001649|GO:0045669|GO:0031012|GO:0043280|GO:…	86049012	chr1	86048953	+	hs|1p22.3	NM_001554	chr1:86048953-86049012	NM_001554	Hs.8867
A_23_P118516	2.18756	1.12933	2.18756	up	TVP23B	trans-golgi network vesicle protein 23 homolog B (S. cerevisiae)	FALSE	Homo sapiens trans-golgi network vesicle protein 23 homolog B (S. cerevisiae) (TVP23B), mRNA [NM_016078]	51030	GO:0016021	18709342	chr17	18709283	+	hs|17p11.2	NM_016078	chr17:18709283-18709342	NM_016078	Hs.87295
A_23_P215505	2.74225	1.45536	2.74225	up	RAPGEF5	Rap guanine nucleotide exchange factor (GEF) 5	FALSE	Homo sapiens Rap guanine nucleotide exchange factor (GEF) 5 (RAPGEF5), mRNA [NM_012294]	9771	GO:0030742|GO:0032320|GO:0007264|GO:0005634|GO:0032854|GO:0017034|GO:0007399|GO:0005088	22158392	chr7	22158333	-	hs|7p15.3	NM_012294	chr7:22158392-22158333	NM_012294	Hs.174768
A_24_P32935	2.43403	1.28334	2.43403	up	FOLR2	folate receptor 2 (fetal)	FALSE	Homo sapiens folate receptor 2 (fetal) (FOLR2), transcript variant 1, mRNA [NM_000803]	2350	GO:0005542|GO:0016020|GO:0015884|GO:0005576|GO:0008517|GO:0031362	71929694	chr11	71929635	+	hs|11q13.4	NM_000803	chr11:71929635-71929694	NM_000803	Hs.433159
A_24_P140608	5.33705	2.41604	5.33705	up	HBEGF	heparin-binding EGF-like growth factor	FALSE	Homo sapiens heparin-binding EGF-like growth factor (HBEGF), mRNA [NM_001945]	1839	GO:0051545|GO:0051897|GO:0008284|GO:0005154|GO:0035313|GO:0051549|GO:0005886|GO:0030307|GO:0090303|GO:0008016|GO:0005615|GO:0007173|GO:0008201|GO:0048011|GO:0030335|GO:0009986|GO:0048015|GO:0005576|GO:0048661|GO:0030666|GO:0007165|GO:0007517|GO:0008543|GO:0005887|GO:0045087|GO:0009405|GO:0008083|GO:0030669|GO:0038095	139713111	chr5	139713052	-	hs|5q31.3	NM_001945	chr5:139713111-139713052	NM_001945	Hs.799
A_23_P36647	2.06244	1.04436	2.06244	up	TMUB2	transmembrane and ubiquitin-like domain containing 2	FALSE	Homo sapiens transmembrane and ubiquitin-like domain containing 2 (TMUB2), transcript variant 2, mRNA [NM_177441]	79089	GO:0016021	42268710	chr17	42268651	+	hs|17q21.31	NM_177441	chr17:42268651-42268710	NM_177441	Hs.181391
A_24_P364807	3.42517	1.77618	3.42517	up	LPCAT2	lysophosphatidylcholine acyltransferase 2	FALSE	Homo sapiens lysophosphatidylcholine acyltransferase 2 (LPCAT2), mRNA [NM_017839]	54947	GO:0005811|GO:0047184|GO:0005795|GO:0005783|GO:0006663|GO:0005509|GO:0044281|GO:0003841|GO:0047192|GO:0000139|GO:0005789|GO:0061024|GO:0016021|GO:0006644|GO:0036151|GO:0046474	55620216	chr16	55620157	+	hs|16q12.2	NM_017839	chr16:55620157-55620216	NM_017839	Hs.460857
A_22_P00003889	2.02153	1.01545	2.02153	up	ZNF608	zinc finger protein 608	FALSE	Homo sapiens zinc finger protein 608 (ZNF608), mRNA [NM_020747]	57507	GO:0046872	124036847	chr5	124036788	-	hs|5q23.2	NM_020747	chr5:124036847-124036788	NM_020747	Hs.266616
A_33_P3413038	5.61866	2.49023	5.61866	up	PLXNB3	plexin B3	FALSE	Homo sapiens plexin B3 (PLXNB3), transcript variant 2, mRNA [NM_001163257]	5365	GO:0005515|GO:0030336|GO:0005886|GO:0019904|GO:0050918|GO:0005622|GO:0051022|GO:0007162|GO:0010593|GO:0001938|GO:0017154|GO:0060326|GO:0007411|GO:0071526|GO:0016021|GO:0034260	153044785	chrX	153044726	+	hs|Xq28	NM_001163257	chrX:153044726-153044785	NM_001163257	Hs.632833
A_23_P117582	2.42152	1.27591	2.42152	up	JDP2	Jun dimerization protein 2	FALSE	Homo sapiens Jun dimerization protein 2 (JDP2), transcript variant 1, mRNA [NM_130469]	122953	GO:0043565|GO:0005515|GO:0003700|GO:0003690|GO:0046982|GO:0031065|GO:0045599|GO:0003682|GO:0005654|GO:0005634|GO:0000122|GO:0006351	75937141	chr14	75937082	+	hs|14q24.3	NM_130469	chr14:75937082-75937141	NM_130469	Hs.196482
A_23_P56529	2.18496	1.1276	2.18496	up	AAMP	angio-associated, migratory cell protein	FALSE	Homo sapiens angio-associated, migratory cell protein (AAMP), transcript variant 2, mRNA [NM_001087]	14	GO:0010595|GO:0005737|GO:0009986|GO:0005886|GO:0014909|GO:0001525|GO:0008201|GO:0030154	219130152	chr2	219129897	-	hs|2q35	NM_001087	chr2:219130152-219129897	NM_001087	Hs.83347
A_23_P36226	4.05383	2.01928	4.05383	up	SLC25A33	solute carrier family 25 (pyrimidine nucleotide carrier), member 33	FALSE	Homo sapiens solute carrier family 25 (pyrimidine nucleotide carrier), member 33 (SLC25A33), mRNA [NM_032315]	84275	GO:0071156|GO:0008284|GO:0032869|GO:0031966|GO:0030307|GO:0051881|GO:0005743|GO:0006864|GO:0006390|GO:0034551|GO:0031930|GO:0007005|GO:0015218|GO:0016021|GO:0006264|GO:0002082	9642510	chr1	9642451	+	hs|1p36.22	NM_032315	chr1:9642451-9642510	NM_032315	Hs.568613
A_23_P15511	2.98561	1.57803	2.98561	up	DDX5	DEAD (Asp-Glu-Ala-Asp) box helicase 5	FALSE	Homo sapiens DEAD (Asp-Glu-Ala-Asp) box helicase 5 (DDX5), mRNA [NM_004396]	1655	GO:0005515|GO:0005516|GO:0003724|GO:0045069|GO:0005634|GO:0050681|GO:0071013|GO:0004004|GO:0000381|GO:0045944|GO:2001014|GO:0036002|GO:0070062|GO:0003713|GO:0030331|GO:0060765|GO:0005730|GO:0000122|GO:0005524|GO:0001701|GO:0006351|GO:0045667|GO:0072332|GO:0016020|GO:0000398|GO:0030529|GO:0043517|GO:0007623|GO:0016049|GO:0005654|GO:0033148|GO:0019899|GO:0048306	62496344	chr17	62496285	-	hs|17q23.3	NM_004396	chr17:62496344-62496285	NM_004396	Hs.279806
A_23_P60101	2.23142	1.15796	2.23142	up	ZNF696	zinc finger protein 696	FALSE	Homo sapiens zinc finger protein 696 (ZNF696), mRNA [NM_030895]	79943	GO:0006355|GO:0003700|GO:0005634|GO:0003677|GO:0046872|GO:0006351	144379526	chr8	144379467	+	hs|8q24.3	NM_030895	chr8:144379467-144379526	NM_030895	Hs.512740
A_33_P3392187	4.01937	2.00697	4.01937	up	CCDC85A	coiled-coil domain containing 85A	FALSE	Homo sapiens coiled-coil domain containing 85A (CCDC85A), mRNA [NM_001080433]	114800		56612701	chr2	56612642	+	hs|2p16.1	NM_001080433	chr2:56612642-56612701	NM_001080433	Hs.117136
A_33_P3257027	2.98601	1.57822	2.98601	up	FGF7	fibroblast growth factor 7	FALSE	Homo sapiens fibroblast growth factor 7 (FGF7), mRNA [NM_002009]	2252	GO:0008286|GO:0005515|GO:0010838|GO:0008284|GO:0051549|GO:0010463|GO:0050731|GO:0031069|GO:0060665|GO:0007173|GO:0060501|GO:0051781|GO:0008201|GO:0050679|GO:0048011|GO:0005794|GO:0031532|GO:0048015|GO:0009611|GO:0005576|GO:0005104|GO:0042056|GO:0050918|GO:0007165|GO:0008544|GO:0008543|GO:0034394|GO:0045087|GO:0061033|GO:0008083|GO:0038095|GO:0060445	49776869	chr15	49776810	+	hs|15q21.2	NM_002009	chr15:49776810-49776869	NM_002009	Hs.567268
A_23_P144337	8.05264	3.00946	8.05264	up	CCRN4L	CCR4 carbon catabolite repression 4-like (S. cerevisiae)	FALSE	Homo sapiens CCR4 carbon catabolite repression 4-like (S. cerevisiae) (CCRN4L), mRNA [NM_012118]	25819	GO:0006397|GO:0048471|GO:0006355|GO:0033962|GO:0003700|GO:0006366|GO:0009991|GO:0000290|GO:0005634|GO:0003729|GO:0046872|GO:0032922|GO:0045995|GO:0004535|GO:0005737|GO:0045668|GO:0000932|GO:0010629|GO:0045600|GO:0032496|GO:0042752|GO:0007623|GO:0005654|GO:0048255	139966086	chr4	139966027	+	hs|4q31.1	NM_012118	chr4:139966027-139966086	NM_012118	Hs.656047
A_23_P132845	2.43181	1.28203	2.43181	up	CLCN2	chloride channel, voltage-sensitive 2	FALSE	Homo sapiens chloride channel, voltage-sensitive 2 (CLCN2), transcript variant 1, mRNA [NM_004366]	1181	GO:0044070|GO:0034220|GO:0060041|GO:0005886|GO:0005247|GO:0034707|GO:0006810|GO:0034765|GO:0060689|GO:0055085	184064787	chr3	184064728	-	hs|3q27.1	NM_004366	chr3:184064787-184064728	NM_004366	Hs.436847
A_23_P359655	2.04241	1.03028	2.04241	up	ZNF664	zinc finger protein 664	FALSE	Homo sapiens zinc finger protein 664 (ZNF664), transcript variant 1, mRNA [NM_152437]	144348	GO:0008150|GO:0003674|GO:0006355|GO:0005634|GO:0003677|GO:0046872|GO:0006351	124499625	chr12	124499566	+	hs|12q24.31	NM_152437	chr12:124499566-124499625	NM_152437	Hs.524828
A_23_P57306	2.04107	1.02933	2.04107	up	CHAF1B	chromatin assembly factor 1, subunit B (p60)	FALSE	Homo sapiens chromatin assembly factor 1, subunit B (p60) (CHAF1B), mRNA [NM_005441]	8208	GO:0000790|GO:0006355|GO:0033186|GO:0006335|GO:0005634|GO:0006351|GO:0005829|GO:0006260|GO:0043234|GO:0042393|GO:0005737|GO:0007049|GO:0006281|GO:0006461|GO:0031497|GO:0003682|GO:0005654|GO:0051082	37789017	chr21	37788958	+	hs|21q22.12	NM_005441	chr21:37788958-37789017	NM_005441	Hs.75238
A_24_P45005	2.31752	1.21258	2.31752	up	NPEPL1	aminopeptidase-like 1	FALSE	Homo sapiens aminopeptidase-like 1 (NPEPL1), transcript variant 1, mRNA [NM_024663]	79716	GO:0005737|GO:0030145|GO:0004177|GO:0008235|GO:0006508|GO:0005634	57290465	chr20	57290406	+	hs|20q13.32	NM_024663	chr20:57290406-57290465	NM_024663	Hs.654868
A_23_P76799	2.05846	1.04157	2.05846	up	BAZ1A	bromodomain adjacent to zinc finger domain, 1A	FALSE	Homo sapiens bromodomain adjacent to zinc finger domain, 1A (BAZ1A), transcript variant 1, mRNA [NM_013448]	11177	GO:0005515|GO:0006261|GO:0008623|GO:0006355|GO:0016590|GO:0008270|GO:0006338|GO:0000228|GO:0006351|GO:0004402	35222268	chr14	35222209	-	hs|14q13.1	NM_013448	chr14:35222268-35222209	NM_013448	Hs.509140
A_23_P46396	3.36144	1.74908	3.36144	up	PTBP2	polypyrimidine tract binding protein 2	FALSE	Homo sapiens polypyrimidine tract binding protein 2 (PTBP2), transcript variant 6, mRNA [NM_021190]	58155	GO:2000177|GO:0000166|GO:0033119|GO:0006376|GO:0005681|GO:0003729	97280044	chr1	97279985	+	hs|1p21.3	NM_021190	chr1:97279985-97280044	NM_021190	Hs.743449
A_23_P140256	3.46601	1.79328	3.46601	up	PNP	purine nucleoside phosphorylase	FALSE	Homo sapiens purine nucleoside phosphorylase (PNP), mRNA [NM_000270]	4860	GO:0046638|GO:0004731|GO:0034356|GO:0044281|GO:0005829|GO:0005622|GO:0006955|GO:0006195|GO:0005737|GO:0001882|GO:0008144|GO:0042102|GO:0043101|GO:0002060|GO:0005856|GO:0070062|GO:0070970|GO:0042493|GO:0055086|GO:0006738|GO:0034418|GO:0006148|GO:0006139|GO:0006144|GO:0042301	20945163	chr14	20945104	+	hs|14q11.2	NM_000270	chr14:20945104-20945163	NM_000270	Hs.75514
A_32_P144920	3.37413	1.75452	3.37413	up	NECAP1	NECAP endocytosis associated 1	FALSE	Homo sapiens NECAP endocytosis associated 1 (NECAP1), transcript variant 1, mRNA [NM_015509]	25977	GO:0030125|GO:0005905|GO:0005886|GO:0015031|GO:0006897	8249433	chr12	8249373	+	hs|12p13.31	NM_015509	chr12:8249373-8249433	NM_015509	Hs.555927
A_23_P120883	4.09258	2.03301	4.09258	up	HMOX1	heme oxygenase (decycling) 1	FALSE	Homo sapiens heme oxygenase (decycling) 1 (HMOX1), mRNA [NM_002133]	3162	GO:0031670|GO:0008219|GO:0042542|GO:0043627|GO:0005615|GO:0042803|GO:0006879|GO:0043524|GO:0051260|GO:0042167|GO:0043123|GO:0006979|GO:0032764|GO:0043305|GO:0014806|GO:0006788|GO:0043392|GO:0006778|GO:0010656|GO:0005789|GO:0019899|GO:0071243|GO:0020037|GO:0045080|GO:0048471|GO:0007264|GO:0005783|GO:0004392|GO:0034101|GO:0004630|GO:0005634|GO:0044281|GO:0055072|GO:0046872|GO:0043433|GO:0005829|GO:…	35790181	chr22	35790122	+	hs|22q12.3	NM_002133	chr22:35790122-35790181	NM_002133	Hs.517581
A_33_P3412143	2.34821	1.23156	2.34821	up	RASSF10	Ras association (RalGDS/AF-6) domain family (N-terminal) member 10	FALSE	Homo sapiens Ras association (RalGDS/AF-6) domain family (N-terminal) member 10 (RASSF10), mRNA [NM_001080521]	644943	GO:0007165|GO:0000922|GO:0005815|GO:0005829	13032619	chr11	13032560	+	hs|11p15.2	NM_001080521	chr11:13032560-13032619	NM_001080521	Hs.134650
A_23_P113005	2.32114	1.21483	2.32114	up	EFNA1	ephrin-A1	FALSE	Homo sapiens ephrin-A1 (EFNA1), transcript variant 1, mRNA [NM_004428]	1942	GO:0005515|GO:0033628|GO:0005886|GO:0003180|GO:0050730|GO:0003183|GO:0007267|GO:0050731|GO:0010719|GO:0014028|GO:0000187|GO:0007411|GO:0034446|GO:0061002|GO:0046658|GO:0070062|GO:0003199|GO:0048013|GO:0005102|GO:0045765|GO:0005576|GO:0001525|GO:0000122|GO:0043535|GO:0016477|GO:0046875|GO:0005887|GO:0050770	155106826	chr1	155106767	+	hs|1q22	NM_004428	chr1:155106767-155106826	NM_004428	Hs.516664
A_24_P191588	3.60402	1.84961	3.60402	up	ALAS1	5'-aminolevulinate synthase 1	FALSE	Homo sapiens 5'-aminolevulinate synthase 1 (ALAS1), transcript variant 1, mRNA [NM_000688]	211	GO:0006996|GO:0044281|GO:0006782|GO:0006783|GO:0005739|GO:0005737|GO:0006778|GO:0005759|GO:0030170|GO:0005654|GO:0007005|GO:0003870|GO:0044255	52246336	chr3	52246277	+	hs|3p21.2	NM_000688	chr3:52246277-52246336	NM_000688	Hs.476308
A_22_P00002220	4.27885	2.09722	4.27885	up			FALSE				201692057	chr2	201691998	+	hs|2q33.1		chr2:201691998-201692057
A_23_P209337	2.40247	1.26452	2.40247	up	METTL21A	methyltransferase like 21A	FALSE	Homo sapiens methyltransferase like 21A (METTL21A), transcript variant 1, mRNA [NM_145280]	151194	GO:0005515|GO:0018022|GO:0005737|GO:0043462|GO:0006479|GO:0051117|GO:0030544|GO:0016279	208477667	chr2	208477608	-	hs|2q33.3	NM_145280	chr2:208477667-208477608	NM_145280	Hs.664764
A_23_P46852	2.04545	1.03242	2.04545	up	OBFC1	oligonucleotide/oligosaccharide-binding fold containing 1	FALSE	Homo sapiens oligonucleotide/oligosaccharide-binding fold containing 1 (OBFC1), mRNA [NM_024928]	79991	GO:0005515|GO:0070188|GO:0045740|GO:0005730|GO:0005634|GO:0010833|GO:0043231|GO:0000723|GO:0003697|GO:0005654|GO:0045111|GO:0043047|GO:0000784	105657329	chr10	105651975	-	hs|10q24.33	NM_024928	chr10:105657329-105651975	NM_024928	Hs.62314
A_23_P359647	2.08682	1.06131	2.08682	up	NFAT5	nuclear factor of activated T-cells 5, tonicity-responsive	FALSE	Homo sapiens nuclear factor of activated T-cells 5, tonicity-responsive (NFAT5), transcript variant 1, mRNA [NM_138714]	10725	GO:0005515|GO:0007588|GO:0007165|GO:0005737|GO:0001077|GO:0003700|GO:0006366|GO:0045944|GO:0005634|GO:0001816|GO:0000978|GO:0070884	69738370	chr16	69738311	+	hs|16q22.1	NM_138714	chr16:69738311-69738370	NM_138714	Hs.371987
A_33_P3230478	2.98385	1.57718	2.98385	up	C1S	complement component 1, s subcomponent	FALSE	Homo sapiens complement component 1, s subcomponent (C1S), transcript variant 1, mRNA [NM_201442]	716	GO:0005515|GO:0006956|GO:0004252|GO:0045087|GO:0006958|GO:0005509|GO:0006508|GO:0072562|GO:0005576|GO:0070062|GO:0042802	7171652	chr12	7171593	+	hs|12p13.31	NM_201442	chr12:7171593-7171652	NM_201442	Hs.458355
A_23_P209499	8.15609	3.02788	8.15609	up	PAX3	paired box 3	FALSE	Homo sapiens paired box 3 (PAX3), transcript variant PAX3D, mRNA [NM_181458]	5077	GO:0005515|GO:0060594|GO:0008284|GO:0003700|GO:0006366|GO:0008283|GO:0007605|GO:0003705|GO:0001755|GO:0005634|GO:0007507|GO:0045944|GO:0009887|GO:0048066|GO:0006915|GO:0001843|GO:0000122|GO:0014807|GO:0048663|GO:0021527|GO:0043565|GO:0007517|GO:0003682|GO:0071837|GO:0045893	223064840	chr2	223064781	-	hs|2q36.1	NM_181458	chr2:223064840-223064781	NM_181458	Hs.42146
A_23_P166306	2.50724	1.3261	2.50724	up	CBS	cystathionine-beta-synthase	FALSE	Homo sapiens cystathionine-beta-synthase (CBS), transcript variant 1, mRNA [NM_000071]	875	GO:0019343|GO:0005515|GO:0070814|GO:0019346|GO:0006535|GO:0005634|GO:0044281|GO:0042803|GO:0046872|GO:0050667|GO:0005829|GO:0042802|GO:0043231|GO:0072341|GO:0034641|GO:0004122|GO:0031625|GO:0005730|GO:0000096|GO:0043418|GO:0030170|GO:0006563|GO:0019899|GO:0019448|GO:0006565|GO:0020037	44473378	chr21	44473319	-	hs|21q22.3	NM_000071	chr21:44473378-44473319	NM_000071	Hs.533013
A_23_P110712	3.5032	1.80868	3.5032	up	DUSP1	dual specificity phosphatase 1	FALSE	Homo sapiens dual specificity phosphatase 1 (DUSP1), mRNA [NM_004417]	1843	GO:0005515|GO:0042542|GO:0090266|GO:0005634|GO:0051591|GO:0032870|GO:0035335|GO:0000188|GO:0035556|GO:0043409|GO:0005737|GO:0006470|GO:0035970|GO:0051447|GO:0043407|GO:0070373|GO:0009416|GO:0032526|GO:0032355|GO:0006979|GO:0017017|GO:0004726|GO:0001706|GO:0043066|GO:0043065|GO:0008330|GO:0051384|GO:0042981|GO:0033574|GO:0071850|GO:0051592|GO:2000279|GO:0008138	172195355	chr5	172195296	-	hs|5q35.1	NM_004417	chr5:172195355-172195296	NM_004417	Hs.171695
A_21_P0009685	2.12674	1.08864	2.12674	up	TMEM167A	transmembrane protein 167A	FALSE	Homo sapiens transmembrane protein 167A (TMEM167A), mRNA [NM_174909]	153339	GO:0000139|GO:0016021	82352827	chr5	82352768	-	hs|5q14.2	NM_174909	chr5:82352827-82352768	NM_174909	Hs.355606
A_23_P77630	2.23516	1.16038	2.23516	up	MAP1LC3B	microtubule-associated protein 1 light chain 3 beta	FALSE	Homo sapiens microtubule-associated protein 1 light chain 3 beta (MAP1LC3B), mRNA [NM_022818]	81631	GO:0005515|GO:0006995|GO:0008017|GO:0005776|GO:0000422|GO:0005930|GO:0000421|GO:0005874|GO:0050811|GO:0031410|GO:0000407|GO:0005829|GO:0012505|GO:0005622|GO:0031090|GO:0061025|GO:0000045|GO:0019898	87437499	chr16	87437440	+	hs|16q24.2	NM_022818	chr16:87437440-87437499	NM_022818	Hs.356061
A_21_P0000023	5.71714	2.51529	5.71714	up	RIOK2	RIO kinase 2	FALSE	Homo sapiens RIO kinase 2 (RIOK2), transcript variant 2, mRNA [NM_001159749]	55781	GO:0004674|GO:0006468|GO:0005524	96502593	chr5	96502534	-	hs|5q15	NM_001159749	chr5:96502593-96502534	NM_001159749	Hs.27021
A_23_P122007	2.04626	1.03299	2.04626	up	C5orf30	chromosome 5 open reading frame 30	FALSE	Homo sapiens chromosome 5 open reading frame 30 (C5orf30), mRNA [NM_033211]	90355	GO:0005515|GO:0005737|GO:0060271|GO:0035869|GO:0015031	102613871	chr5	102613812	+	hs|5q21.1	NM_033211	chr5:102613812-102613871	NM_033211	Hs.482976
A_23_P34744	4.0672	2.02404	4.0672	up	CTSK	cathepsin K	FALSE	Homo sapiens cathepsin K (CTSK), mRNA [NM_000396]	1513	GO:0045453|GO:0005518|GO:0043394|GO:0005576|GO:0002224|GO:0005615|GO:0004197|GO:0001957|GO:0022617|GO:0030198|GO:0051603|GO:0045087|GO:0036021|GO:0030574|GO:0006508|GO:0008234|GO:0001968	150768912	chr1	150768853	-	hs|1q21.3	NM_000396	chr1:150768912-150768853	NM_000396	Hs.632466
A_24_P396702	2.86073	1.51638	2.86073	up	CD302	CD302 molecule	FALSE	Homo sapiens CD302 molecule (CD302), transcript variant 1, mRNA [NM_014880]	9936	GO:0006909|GO:0005902|GO:0016020|GO:0030246|GO:0030175|GO:0016021|GO:0005938	160625659	chr2	160625600	-	hs|2q24.2	NM_014880	chr2:160625659-160625600	NM_014880	Hs.130014
A_23_P200535	2.77192	1.47088	2.77192	up	TRAPPC3	trafficking protein particle complex 3	FALSE	Homo sapiens trafficking protein particle complex 3 (TRAPPC3), transcript variant 1, mRNA [NM_014408]	27095	GO:0005515|GO:0005794|GO:0005783|GO:0016192	36603463	chr1	36603404	-	hs|1p34.3	NM_014408	chr1:36603463-36603404	NM_014408	Hs.523131
A_24_P336931	2.10947	1.07688	2.10947	up	ANKRD36	ankyrin repeat domain 36	FALSE	Homo sapiens ankyrin repeat domain 36 (ANKRD36), mRNA [NM_001164315]	375248		97915318	chr2	97914922	+	hs|2q11.2	NM_001164315	chr2:97914922-97915318	NM_001164315	Hs.541894
A_23_P141126	2.23977	1.16335	2.23977	up	GALK1	galactokinase 1	FALSE	Homo sapiens galactokinase 1 (GALK1), mRNA [NM_000154]	2584	GO:0005975|GO:0019388|GO:0044281|GO:0005524|GO:0005829|GO:0004335|GO:0005737|GO:0005534|GO:0016020|GO:0019402|GO:0009405|GO:0046835|GO:0006012|GO:0070062	73754580	chr17	73754445	-	hs|17q25.1	NM_000154	chr17:73754580-73754445	NM_000154	Hs.407966
A_23_P372308	3.52443	1.81739	3.52443	up	RGMA	repulsive guidance molecule family member a	FALSE	Homo sapiens repulsive guidance molecule family member a (RGMA), transcript variant 4, mRNA [NM_020211]	56963	GO:0005886|GO:0007411|GO:0005783|GO:0031225|GO:0030509|GO:0015026|GO:0070062	93586835	chr15	93586776	-	hs|15q26.1	NM_020211	chr15:93586835-93586776	NM_020211	Hs.271277
A_23_P16139	2.43087	1.28147	2.43087	up	CHERP	calcium homeostasis endoplasmic reticulum protein	FALSE	Homo sapiens calcium homeostasis endoplasmic reticulum protein (CHERP), mRNA [NM_006387]	10523	GO:0005515|GO:0006396|GO:0048471|GO:0005737|GO:0051209|GO:0008285|GO:0016020|GO:0006874|GO:0051533|GO:0033017|GO:0044325|GO:0007399	16629439	chr19	16629380	-	hs|19p13.11	NM_006387	chr19:16629439-16629380	NM_006387	Hs.740364
A_33_P3316555	2.18593	1.12825	2.18593	up	MGST3	microsomal glutathione S-transferase 3	FALSE	Homo sapiens microsomal glutathione S-transferase 3 (MGST3), mRNA [NM_004528]	4259	GO:0006629|GO:0006805|GO:0005635|GO:0044281|GO:0004364|GO:0043231|GO:0004602|GO:0007165|GO:0004601|GO:0016020|GO:0005789|GO:0016021|GO:0070062|GO:0055114	165623587	chr1	165623528	+	hs|1q24.1	NM_004528	chr1:165623528-165623587	NM_004528	Hs.191734
A_33_P3417865	2.0863	1.06095	2.0863	up	ZFP36L1	ZFP36 ring finger protein-like 1	FALSE	Homo sapiens ZFP36 ring finger protein-like 1 (ZFP36L1), transcript variant 1, mRNA [NM_004926]	677	GO:0005515|GO:0043488|GO:0010467|GO:0033077|GO:0006355|GO:0060710|GO:0003700|GO:0060712|GO:0008283|GO:0006915|GO:0005634|GO:0003729|GO:0003342|GO:0003677|GO:0046872|GO:0006417|GO:0005829|GO:0007507|GO:0035264|GO:0021915|GO:0001570|GO:0000288	69255413	chr14	69255354	-	hs|14q24.1	NM_004926	chr14:69255413-69255354	NM_004926	Hs.85155
A_24_P406334	3.99941	1.99979	3.99941	up	STEAP1	six transmembrane epithelial antigen of the prostate 1	FALSE	Homo sapiens six transmembrane epithelial antigen of the prostate 1 (STEAP1), mRNA [NM_012449]	26872	GO:0005215|GO:0005886|GO:0055072|GO:0055085|GO:0046872|GO:0016020|GO:0005887|GO:0005911|GO:0016491|GO:0010008|GO:0006811|GO:0015267|GO:0055114	89790590	chr7	89790531	+	hs|7q21.13	NM_012449	chr7:89790531-89790590	NM_012449	Hs.61635
A_23_P5392	2.14437	1.10056	2.14437	up	TP53I3	tumor protein p53 inducible protein 3	FALSE	Homo sapiens tumor protein p53 inducible protein 3 (TP53I3), transcript variant 1, mRNA [NM_004881]	9540	GO:0048038|GO:0008270|GO:0006739|GO:0003960|GO:0070402|GO:0042803|GO:0070062|GO:0055114	24302356	chr2	24300615	-	hs|2p23.3	NM_004881	chr2:24302356-24300615	NM_004881	Hs.50649
A_23_P395426	2.37673	1.24898	2.37673	up	DIDO1	death inducer-obliterator 1	FALSE	Homo sapiens death inducer-obliterator 1 (DIDO1), transcript variant 1, mRNA [NM_022105]	11083	GO:0005737|GO:0005819|GO:0008270|GO:0005634|GO:0097190|GO:0006351	61536759	chr20	61536700	-	hs|20q13.33	NM_022105	chr20:61536759-61536700	NM_022105	Hs.517172
A_23_P201445	2.27957	1.18876	2.27957	up	DESI2	desumoylating isopeptidase 2	FALSE	Homo sapiens desumoylating isopeptidase 2 (DESI2), transcript variant 1, mRNA [NM_016076]	51029	GO:0005737|GO:0006508|GO:0008233	244871951	chr1	244871892	+	hs|1q44	NM_016076	chr1:244871892-244871951	NM_016076	Hs.498317
A_24_P291231	15.5426	3.95816	15.5426	up	PER3	period circadian clock 3	FALSE	Homo sapiens period circadian clock 3 (PER3), transcript variant 4, mRNA [NM_016831]	8863	GO:0005515|GO:0007165|GO:0005737|GO:0045187|GO:0005634|GO:0004871|GO:0000122|GO:0019900|GO:0032922|GO:0031625|GO:0006351	7904700	chr1	7904641	+	hs|1p36.23	NM_016831	chr1:7904641-7904700	NM_016831	Hs.162200
A_23_P13907	2.97202	1.57145	2.97202	up	IGF1	insulin-like growth factor 1 (somatomedin C)	FALSE	Homo sapiens insulin-like growth factor 1 (somatomedin C) (IGF1), transcript variant 4, mRNA [NM_000618]	3479	GO:0010468|GO:0005515|GO:0033160|GO:0009408|GO:0005159|GO:0005158|GO:0046579|GO:0030879|GO:0005615|GO:0030104|GO:0046326|GO:0045445|GO:0045821|GO:0014834|GO:0045740|GO:0030168|GO:0045840|GO:0014068|GO:0014904|GO:0030166|GO:0001501|GO:0007517|GO:0005178|GO:0005179|GO:0043388|GO:0010001|GO:0045893|GO:0044267|GO:0008083|GO:0035630|GO:0008284|GO:0008285|GO:0005886|GO:0032878|GO:0006928|GO:0021940|GO:…	102796325	chr12	102796266	-	hs|12q23.2	NM_000618	chr12:102796325-102796266	NM_000618	Hs.160562
A_24_P937325	2.15661	1.10877	2.15661	up	FGD4	FYVE, RhoGEF and PH domain containing 4	FALSE	FYVE, RhoGEF and PH domain containing 4 [Source:HGNC Symbol;Acc:HGNC:19125] [ENST00000472289]	121512	GO:0030036|GO:0030035|GO:0031267|GO:0007264|GO:0008360|GO:0030032|GO:0030175|GO:0015629|GO:0046872|GO:0005829|GO:0005085|GO:0005737|GO:0007010|GO:0046847|GO:0005089|GO:0051056|GO:0048011|GO:0005794|GO:0043065|GO:0003779|GO:0097190|GO:0001726|GO:0030027|GO:0043088|GO:0043547|GO:0032321	32735861	chr12	32735802	+	hs|12p11.21	AL713762	chr12:32735802-32735861		Hs.117835
A_23_P114405	2.6243	1.39193	2.6243	up	MORF4L2	mortality factor 4 like 2	FALSE	Homo sapiens mortality factor 4 like 2 (MORF4L2), transcript variant 2, mRNA [NM_012286]	9643	GO:0005515|GO:0006281|GO:0045944|GO:0006325|GO:0005730|GO:0051155|GO:0005654|GO:0040008|GO:0006351|GO:0016568	102930926	chrX	102930867	-	hs|Xq22.2	NM_012286	chrX:102930926-102930867	NM_012286	Hs.326387
A_33_P3286278	2.6143	1.38643	2.6143	up	GRN	granulin	FALSE	Homo sapiens granulin (GRN), mRNA [NM_002087]	2896	GO:0050679|GO:0005739|GO:0005515|GO:0007165|GO:0007566|GO:0001835|GO:0008083|GO:0005615|GO:0005125|GO:0070062|GO:0043231	42430469	chr17	42430410	+	hs|17q21.31	NM_002087	chr17:42430410-42430469	NM_002087	Hs.514220
A_33_P3265376	3.71408	1.893	3.71408	up	HOMER3	homer homolog 3 (Drosophila)	FALSE	Homo sapiens homer homolog 3 (Drosophila) (HOMER3), transcript variant 4, mRNA [NM_001145724]	9454	GO:0005515|GO:0030054|GO:0005886|GO:0019904|GO:0007216|GO:0045178|GO:2001256|GO:0005575|GO:0006605|GO:0008022|GO:0005829|GO:0005737|GO:0035256|GO:0045211	19049274	chr19	19049215	-	hs|19p13.11	NM_001145724	chr19:19049274-19049215	NM_001145724	Hs.720208
A_33_P3210203	2.82464	1.49806	2.82464	up	SPIRE2	spire-type actin nucleation factor 2	FALSE	Homo sapiens spire-type actin nucleation factor 2 (SPIRE2), mRNA [NM_032451]	84501	GO:0048471|GO:0030036|GO:0005886|GO:0070649|GO:0046907|GO:0003779|GO:0015031|GO:0032154|GO:0005829|GO:0036089|GO:0045010|GO:0051295|GO:0040038|GO:0005856|GO:0016192|GO:0005938|GO:0030659	89937727	chr16	89937668	+	hs|16q24.3	NM_032451	chr16:89937668-89937727	NM_032451	Hs.461786
A_23_P98022	3.60049	1.84819	3.60049	up	SIRT1	sirtuin 1	FALSE	Homo sapiens sirtuin 1 (SIRT1), transcript variant 1, mRNA [NM_012238]	23411	GO:0005515|GO:0010467|GO:0030308|GO:0000790|GO:0006364|GO:0006325|GO:0032071|GO:0007283|GO:0010906|GO:0003950|GO:0034605|GO:0033158|GO:0006979|GO:0031937|GO:0016239|GO:0032868|GO:0017136|GO:0031393|GO:0005719|GO:0003714|GO:0007569|GO:0019213|GO:0033553|GO:0001542|GO:0000122|GO:0033558|GO:0032922|GO:0018394|GO:0005720|GO:0006281|GO:0007517|GO:0000731|GO:0005654|GO:0019899|GO:0006642|GO:0008134|GO:…	69677619	chr10	69677560	+	hs|10q21.3	NM_012238	chr10:69677560-69677619	NM_012238	Hs.369779
A_32_P232035	2.15306	1.10639	2.15306	up	LOC100270746	uncharacterized LOC100270746	FALSE	Homo sapiens uncharacterized LOC100270746 (LOC100270746), long non-coding RNA [NR_026776]	100270746		26987283	chr6	26987224	-	hs|6p22.2	NR_026776	chr6:26987283-26987224	NR_026776	Hs.590428
A_23_P52647	2.09667	1.0681	2.09667	up	EHD1	EH-domain containing 1	FALSE	Homo sapiens EH-domain containing 1 (EHD1), transcript variant 2, mRNA [NM_006795]	10938	GO:0042632|GO:0005515|GO:0005811|GO:0017137|GO:0005886|GO:2001137|GO:0032456|GO:0005509|GO:0005525|GO:0010886|GO:0005524|GO:0006886|GO:0031175|GO:0006897|GO:0034383|GO:0016020|GO:0007596|GO:0031901|GO:0051260|GO:0031095|GO:0055038|GO:0010008|GO:0070062	64620221	chr11	64620181	-	hs|11q13.1	NM_006795	chr11:64620221-64620181	NM_006795	Hs.523774
A_23_P121533	4.31449	2.10919	4.31449	up	SPON2	spondin 2, extracellular matrix protein	FALSE	Homo sapiens spondin 2, extracellular matrix protein (SPON2), transcript variant 1, mRNA [NM_012445]	10417	GO:0032755|GO:0002448|GO:0032760|GO:0050832|GO:0005578|GO:0003823|GO:0005615|GO:0046872|GO:0001530|GO:0051607|GO:0071222|GO:0007411|GO:0045087|GO:0060907|GO:0007155|GO:0008228|GO:0043152|GO:0070062	1160797	chr4	1160738	-	hs|4p16.3	NM_012445	chr4:1160797-1160738	NM_012445	Hs.635350
A_33_P3395743	2.22868	1.15619	2.22868	up	VWA1	von Willebrand factor A domain containing 1	FALSE	Homo sapiens von Willebrand factor A domain containing 1 (VWA1), transcript variant 1, mRNA [NM_022834]	64856	GO:0030198|GO:0005614|GO:0048266|GO:0005615|GO:0070062|GO:0042802|GO:0005604	1376145	chr1	1376086	+	hs|1p36.33	NM_022834	chr1:1376086-1376145	NM_022834	Hs.449009
A_32_P80741	3.48842	1.80257	3.48842	up	C8orf22	chromosome 8 open reading frame 22	FALSE	Homo sapiens chromosome 8 open reading frame 22 (C8orf22), transcript variant 1, mRNA [NM_001007176]	492307	GO:0007275|GO:0030154	49988051	chr8	49987992	+	hs|8q11.21	NM_001007176	chr8:49987992-49988051	NM_001007176	Hs.49890
A_23_P209360	2.16159	1.11209	2.16159	up	KLHL29	kelch-like family member 29	FALSE	Homo sapiens kelch-like family member 29 (KLHL29), mRNA [NM_052920]	114818		23931368	chr2	23931309	+	hs|2p24.1	NM_052920	chr2:23931309-23931368	NM_052920	Hs.130593
A_23_P370142	2.07597	1.05378	2.07597	up	PAFAH1B2	platelet-activating factor acetylhydrolase 1b, catalytic subunit 2 (30kDa)	FALSE	Homo sapiens platelet-activating factor acetylhydrolase 1b, catalytic subunit 2 (30kDa) (PAFAH1B2), transcript variant 1, mRNA [NM_002572]	5049	GO:0006629|GO:0005886|GO:0046982|GO:0047179|GO:0005730|GO:0003847|GO:0007283|GO:0042803|GO:0005829|GO:0016042|GO:0005737|GO:0007420|GO:0070062|GO:0016239	117040926	chr11	117040867	+	hs|11q23.3	NM_002572	chr11:117040867-117040926	NM_002572	Hs.728488
A_23_P305723	2.16402	1.11371	2.16402	up	MIER1	mesoderm induction early response 1, transcriptional regulator	FALSE	Homo sapiens mesoderm induction early response 1, transcriptional regulator (MIER1), transcript variant 1, mRNA [NM_020948]	57708	GO:0005515|GO:0007165|GO:0005737|GO:0017053|GO:0003682|GO:0005654|GO:0004871|GO:0043123|GO:0003677|GO:0031937|GO:0006351	67453192	chr1	67453133	+	hs|1p31.3	NM_020948	chr1:67453133-67453192	NM_020948	Hs.605432
A_23_P103465	2.41513	1.2721	2.41513	up	PLA2G5	phospholipase A2, group V	FALSE	Homo sapiens phospholipase A2, group V (PLA2G5), mRNA [NM_000929]	5322	GO:0019370|GO:0048471|GO:0005794|GO:0005886|GO:0009986|GO:0036149|GO:0006663|GO:0005509|GO:0036148|GO:0005576|GO:0044281|GO:0051591|GO:0016042|GO:0036150|GO:0047498|GO:0006644|GO:0034097|GO:0006654|GO:0008201|GO:0036151|GO:0050482|GO:0046474|GO:0036152	20417482	chr1	20417423	+	hs|1p36.12	NM_000929	chr1:20417423-20417482	NM_000929	Hs.319438
A_24_P12435	3.74807	1.90615	3.74807	up	NCOA7	nuclear receptor coactivator 7	FALSE	Homo sapiens nuclear receptor coactivator 7 (NCOA7), transcript variant 1, mRNA [NM_181782]	135112	GO:0005622|GO:0005515|GO:0030374|GO:0045944|GO:0035257|GO:0005634|GO:0006351	126251938	chr6	126251879	+	hs|6q22.32	NM_181782	chr6:126251879-126251938	NM_181782	Hs.171426
A_33_P3358601	4.35325	2.12209	4.35325	up	IFITM10	interferon induced transmembrane protein 10	FALSE	Homo sapiens interferon induced transmembrane protein 10 (IFITM10), mRNA [NM_001170820]	402778	GO:0009607|GO:0005886|GO:0016021	1753699	chr11	1753640	-	hs|11p15.5	NM_001170820	chr11:1753699-1753640	NM_001170820	Hs.121575
A_33_P3410589	3.02069	1.59488	3.02069	up	FAM43A	family with sequence similarity 43, member A	FALSE	Homo sapiens family with sequence similarity 43, member A (FAM43A), mRNA [NM_153690]	131583		194409762	chr3	194409703	+	hs|3q29	NM_153690	chr3:194409703-194409762	NM_153690	Hs.435080
A_23_P420863	3.58497	1.84196	3.58497	up	NOD2	nucleotide-binding oligomerization domain containing 2	FALSE	Homo sapiens nucleotide-binding oligomerization domain containing 2 (NOD2), transcript variant 1, mRNA [NM_022162]	64127	GO:0005515|GO:0032755|GO:0002710|GO:0002756|GO:0032500|GO:0002755|GO:0009595|GO:0032496|GO:0032498|GO:0005856|GO:0032689|GO:0002367|GO:0009986|GO:0019901|GO:0032760|GO:0034134|GO:0032720|GO:0006952|GO:0002224|GO:0002227|GO:0002830|GO:0035666|GO:0034166|GO:0019899|GO:0016045|GO:0034162|GO:0034142|GO:0005886|GO:0002862|GO:0032733|GO:0035419|GO:0032731|GO:0032735|GO:0032874|GO:0005829|GO:0035556|GO:…	50766829	chr16	50766770	+	hs|16q12.1	NM_022162	chr16:50766770-50766829	NM_022162	Hs.592072
A_23_P66682	2.24352	1.16576	2.24352	up	HOXB6	homeobox B6	FALSE	Homo sapiens homeobox B6 (HOXB6), mRNA [NM_018952]	3216	GO:0043565|GO:0006355|GO:0003700|GO:0034101|GO:0048704|GO:0005634|GO:0009952|GO:0006351	46673252	chr17	46673193	-	hs|17q21.32	NM_018952	chr17:46673252-46673193	NM_018952	Hs.98428
A_23_P324813	5.42509	2.43965	5.42509	up	BCL6B	B-cell CLL/lymphoma 6, member B	FALSE	Homo sapiens B-cell CLL/lymphoma 6, member B (BCL6B), mRNA [NM_181844]	255877	GO:0005634|GO:0000122|GO:0003677|GO:0046872	6932715	chr17	6932656	+	hs|17p13.1	NM_181844	chr17:6932656-6932715	NM_181844	Hs.22575
A_32_P71447	3.07466	1.62043	3.07466	up	NCAPD3	non-SMC condensin II complex, subunit D3	FALSE	Homo sapiens non-SMC condensin II complex, subunit D3 (NCAPD3), mRNA [NM_015261]	23310	GO:0005515|GO:0007076|GO:0016020|GO:0042585|GO:0000799|GO:0005654|GO:0035064|GO:0031618|GO:0000278|GO:0051301	134022687	chr11	134022628	-	hs|11q25	NM_015261	chr11:134022687-134022628	NM_015261	Hs.438550
A_32_P74409	3.57944	1.83973	3.57944	up	C11orf96	chromosome 11 open reading frame 96	FALSE	Homo sapiens chromosome 11 open reading frame 96 (C11orf96), mRNA [NM_001145033]	387763		43965397	chr11	43965338	+	hs|11p11.2	NM_001145033	chr11:43965338-43965397	NM_001145033	Hs.530443
A_24_P354715	2.56124	1.35684	2.56124	up	NT5E	5'-nucleotidase, ecto (CD73)	FALSE	Homo sapiens 5'-nucleotidase, ecto (CD73) (NT5E), transcript variant 1, mRNA [NM_002526]	4907	GO:0005886|GO:0009986|GO:0055086|GO:0046086|GO:0044281|GO:0006259|GO:0031225|GO:0046872|GO:0006196|GO:0046135|GO:0005737|GO:0006195|GO:0000166|GO:0016020|GO:0006144|GO:0050728|GO:0016311|GO:0008253|GO:0006206|GO:0070062	86204950	chr6	86204891	+	hs|6q14.3	NM_002526	chr6:86204891-86204950	NM_002526	Hs.153952
A_33_P3393170	2.77793	1.47401	2.77793	up	CAPN5	calpain 5	FALSE	Homo sapiens calpain 5 (CAPN5), mRNA [NM_004055]	726	GO:0007165|GO:0005737|GO:0004198|GO:0009986|GO:0006508|GO:0005925|GO:0070062	76837196	chr11	76837137	+	hs|11q13.5	NM_004055	chr11:76837137-76837196	NM_004055	Hs.248153
A_23_P111132	3.54258	1.8248	3.54258	up	HSPA1A	heat shock 70kDa protein 1A	FALSE	Homo sapiens heat shock 70kDa protein 1A (HSPA1A), mRNA [NM_005345]	3303	GO:0006986|GO:0005515|GO:0010467|GO:0030308|GO:0034605|GO:0042026|GO:0001618|GO:0031072|GO:0060548|GO:0031397|GO:0010941|GO:0031625|GO:0070062|GO:0070370|GO:0005814|GO:0006402|GO:0045648|GO:0005654|GO:0051082|GO:0019899|GO:0005925|GO:0003725|GO:0090084|GO:0048471|GO:0008285|GO:0006200|GO:0042623|GO:0005783|GO:0000151|GO:0005634|GO:0072562|GO:0005829|GO:0005739|GO:0005737|GO:0008180|GO:2001240|GO:…	31785550	chr6	31785491	+	hs|6p21.33	NM_005345	chr6:31785491-31785550	NM_005345	Hs.274402
A_23_P20480	2.21022	1.14419	2.21022	up	BRF2	BRF2, RNA polymerase III transcription initiation factor 50 kDa subunit	FALSE	Homo sapiens BRF2, RNA polymerase III transcription initiation factor 50 kDa subunit (BRF2), mRNA [NM_018310]	55290	GO:0010467|GO:0006352|GO:0006355|GO:0008270|GO:0005654|GO:0006383	37701951	chr8	37701892	-	hs|8p11.23	NM_018310	chr8:37701951-37701892	NM_018310	Hs.709301
A_23_P133694	2.32179	1.21524	2.32179	up	SLC29A1	solute carrier family 29 (equilibrative nucleoside transporter), member 1	FALSE	Homo sapiens solute carrier family 29 (equilibrative nucleoside transporter), member 1 (SLC29A1), transcript variant 1, mRNA [NM_001078177]	2030	GO:0015862|GO:0005886|GO:0005337|GO:0060079|GO:0071456|GO:0030431|GO:0055085|GO:0016323|GO:0006139|GO:0016324|GO:0007595|GO:0016020|GO:0005887|GO:0015858|GO:0071333	44201834	chr6	44201775	+	hs|6p21.1	NM_001078177	chr6:44201775-44201834	NM_001078177	Hs.25450
A_23_P107313	2.31388	1.21031	2.31388	up	SDF2	stromal cell-derived factor 2	FALSE	Homo sapiens stromal cell-derived factor 2 (SDF2), transcript variant 1, mRNA [NM_006923]	6388	GO:0004169|GO:0016020|GO:0006486|GO:0005615|GO:0035269	26982476	chr17	26982417	-	hs|17q11.2	NM_006923	chr17:26982476-26982417	NM_006923	Hs.514036
A_23_P300150	2.27372	1.18506	2.27372	up	NFATC1	nuclear factor of activated T-cells, cytoplasmic, calcineurin-dependent 1	FALSE	Homo sapiens nuclear factor of activated T-cells, cytoplasmic, calcineurin-dependent 1 (NFATC1), transcript variant 3, mRNA [NM_172387]	4772	GO:0005515|GO:0000790|GO:0003700|GO:0006366|GO:0044212|GO:0003705|GO:0005634|GO:0001837|GO:0005829|GO:0007507|GO:0035556|GO:0000082|GO:0005737|GO:0045944|GO:0001085|GO:0006816|GO:0048273|GO:0005667|GO:0030316|GO:0005528|GO:0001205|GO:0000979|GO:0045087|GO:0005654|GO:0000980|GO:0045893|GO:0038095	77289278	chr18	77289219	+	hs|18q23	NM_172387	chr18:77289219-77289278	NM_172387	Hs.534074
A_23_P117599	2.06692	1.04748	2.06692	up	AHSA1	AHA1, activator of heat shock 90kDa protein ATPase homolog 1 (yeast)	FALSE	Homo sapiens AHA1, activator of heat shock 90kDa protein ATPase homolog 1 (yeast) (AHSA1), mRNA [NM_012111]	10598	GO:0005515|GO:0005737|GO:0005783|GO:0051087|GO:0006950|GO:0032781|GO:0001671|GO:0070062|GO:0005829	77929044	chr14	77928985	+	hs|14q24.3	NM_012111	chr14:77928985-77929044	NM_012111	Hs.204041
A_33_P3329098	3.38339	1.75847	3.38339	up	WTAP	Wilms tumor 1 associated protein	FALSE	Homo sapiens Wilms tumor 1 associated protein (WTAP), transcript variant 1, mRNA [NM_004906]	9589	GO:0008380|GO:0006397|GO:0031965|GO:0007049|GO:0016607|GO:0000381|GO:0005730|GO:0080009|GO:0005654|GO:0005634	160176643	chr6	160176584	+	hs|6q25.3	NM_004906	chr6:160176584-160176643	NM_004906	Hs.446091
A_33_P3414017	2.56261	1.35761	2.56261	up			FALSE				2299301	chr7	2299242	+	hs|7p22.3		chr7:002299242-002299301
A_23_P345674	6.18998	2.62994	6.18998	up	ZNF71	zinc finger protein 71	FALSE	Homo sapiens zinc finger protein 71 (ZNF71), mRNA [NM_021216]	58491	GO:0006355|GO:0003700|GO:0005634|GO:0003677|GO:0046872|GO:0006351	57134758	chr19	57134699	+	hs|19q13.43	NM_021216	chr19:57134699-57134758	NM_021216	Hs.301431
A_23_P111701	2.91786	1.54491	2.91786	up	GNG11	guanine nucleotide binding protein (G protein), gamma 11	FALSE	Homo sapiens guanine nucleotide binding protein (G protein), gamma 11 (GNG11), mRNA [NM_004126]	2791	GO:0007165|GO:0006112|GO:0007186|GO:0005886|GO:0071377|GO:0005834|GO:0003924|GO:0044281|GO:0004871	93555823	chr7	93555764	+	hs|7q21.3	NM_004126	chr7:93555764-93555823	NM_004126	Hs.83381
A_23_P205531	2.66882	1.4162	2.66882	up	RNASE4	ribonuclease, RNase A family, 4	FALSE	Homo sapiens ribonuclease, RNase A family, 4 (RNASE4), transcript variant 4, mRNA [NM_001282192]	6038	GO:0006379|GO:0005576|GO:0004522|GO:0003676|GO:0070062|GO:0009267	21168028	chr14	21167969	+	hs|14q11.2	NM_001282192	chr14:21167969-21168028	NM_001282192	Hs.283749
A_23_P334608	2.20614	1.14152	2.20614	up	GUSB	glucuronidase, beta	FALSE	Homo sapiens glucuronidase, beta (GUSB), transcript variant 1, mRNA [NM_000181]	2990	GO:0004566|GO:0005975|GO:0019904|GO:0005102|GO:0006027|GO:0044281|GO:0043231|GO:0016020|GO:0009405|GO:0030212|GO:0030214|GO:0030203|GO:0070062|GO:0043202	65425765	chr7	65425706	-	hs|7q11.21	NM_000181	chr7:65425765-65425706	NM_000181	Hs.255230
A_23_P381449	2.6722	1.41803	2.6722	up	SP2	Sp2 transcription factor	FALSE	Homo sapiens Sp2 transcription factor (SP2), mRNA [NM_003110]	6668	GO:0006357|GO:0006366|GO:0042826|GO:0000981|GO:0005634|GO:0001701|GO:0003677|GO:0048144|GO:0046872|GO:0006955|GO:0035264|GO:0048568|GO:0005654|GO:0072358	46005998	chr17	46005939	+	hs|17q21.32	NM_003110	chr17:46005939-46005998	NM_003110	Hs.514276
A_32_P76035	2.47904	1.30978	2.47904	up	PNPT1	polyribonucleotide nucleotidyltransferase 1	FALSE	Homo sapiens polyribonucleotide nucleotidyltransferase 1 (PNPT1), mRNA [NM_033109]	87178	GO:0097222|GO:0005515|GO:0000962|GO:0000965|GO:0035458|GO:0000964|GO:0043457|GO:0035928|GO:0035927|GO:0005739|GO:0070207|GO:0005758|GO:0008266|GO:0005737|GO:0051260|GO:2000772|GO:0045926|GO:0000957|GO:0043631|GO:0000958|GO:0006402|GO:0006401|GO:0071850|GO:0071042|GO:0004654|GO:0034046|GO:0035198|GO:2000627|GO:0070584|GO:0000175|GO:0016020|GO:0045025|GO:0034599|GO:0061014	55862315	chr2	55862256	-	hs|2p16.1	NM_033109	chr2:55862315-55862256	NM_033109	Hs.388733
A_23_P119923	2.32801	1.2191	2.32801	up	CNNM4	cyclin and CBS domain divalent metal cation transport mediator 4	FALSE	Homo sapiens cyclin and CBS domain divalent metal cation transport mediator 4 (CNNM4), mRNA [NM_020184]	26504	GO:0005886|GO:0016021|GO:0031214|GO:0007601|GO:0050896|GO:0006811	97477540	chr2	97477481	+	hs|2q11.2	NM_020184	chr2:97477481-97477540	NM_020184	Hs.175043
A_23_P401568	2.4588	1.29795	2.4588	up	MAT2A	methionine adenosyltransferase II, alpha	FALSE	Homo sapiens methionine adenosyltransferase II, alpha (MAT2A), mRNA [NM_005911]	4144	GO:0005515|GO:0006805|GO:0006556|GO:0044281|GO:0032259|GO:0006730|GO:0005524|GO:0004478|GO:0048269|GO:0046872|GO:0005829	85771988	chr2	85771929	+	hs|2p11.2	NM_005911	chr2:85771929-85771988	NM_005911	Hs.516157
A_23_P371824	2.76335	1.46642	2.76335	up	TUFT1	tuftelin 1	FALSE	Homo sapiens tuftelin 1 (TUFT1), transcript variant 1, mRNA [NM_020127]	7286	GO:0030345|GO:0005737|GO:0042476|GO:0005576|GO:0030282	151555923	chr1	151555864	+	hs|1q21.3	NM_020127	chr1:151555864-151555923	NM_020127	Hs.489922
A_32_P112493	3.0909	1.62803	3.0909	up	PKDCC	protein kinase domain containing, cytoplasmic	FALSE	Homo sapiens protein kinase domain containing, cytoplasmic (PKDCC), mRNA [NM_138370]	91461	GO:0005794|GO:0030501|GO:0048286|GO:0042997|GO:0005576|GO:0018108|GO:0048566|GO:0030282|GO:0015031|GO:0005524|GO:0030154|GO:0001501|GO:0004672|GO:0035264|GO:0060021|GO:0032332|GO:0004715	42285065	chr2	42285006	+	hs|2p21	NM_138370	chr2:42285006-42285065	NM_138370	Hs.408542
A_32_P112623	4.44908	2.15351	4.44908	up	FAM27E2	family with sequence similarity 27, member E2	FALSE	Homo sapiens family with sequence similarity 27, member E2 (FAM27E2), long non-coding RNA [NR_103714]	100289124		46385718	chr9	46385659	-	hs|9p11.2	NR_103714	chr9:46385718-46385659	NR_103714
A_23_P354387	3.33659	1.73837	3.33659	up	MYOF	myoferlin	FALSE	Homo sapiens myoferlin (MYOF), transcript variant 1, mRNA [NM_013451]	26509	GO:0005515|GO:0031965|GO:0030947|GO:0005886|GO:0008015|GO:0007520|GO:0005635|GO:0031410|GO:0043231|GO:0034605|GO:0005543|GO:0006936|GO:0005901|GO:0001778|GO:0016021|GO:0030659|GO:0070062	95066378	chr10	95066319	-	hs|10q23.33	NM_013451	chr10:95066378-95066319	NM_013451	Hs.602086
A_24_P54178	4.6979	2.23202	4.6979	up	TMED5	transmembrane emp24 protein transport domain containing 5	FALSE	Homo sapiens transmembrane emp24 protein transport domain containing 5 (TMED5), transcript variant 1, mRNA [NM_016040]	50999	GO:0005515|GO:0005801|GO:0005793|GO:0005794|GO:0033116|GO:0090161|GO:0005789|GO:0016021|GO:0015031|GO:0070971	93617749	chr1	93617690	-	hs|1p22.1	NM_016040	chr1:93617749-93617690	NM_016040	Hs.482873
A_23_P14986	2.00351	1.00253	2.00351	up	HSD11B2	hydroxysteroid (11-beta) dehydrogenase 2	FALSE	Homo sapiens hydroxysteroid (11-beta) dehydrogenase 2 (HSD11B2), mRNA [NM_000196]	3291	GO:0001666|GO:0032868|GO:0007565|GO:0005783|GO:0042493|GO:0006704|GO:0003845|GO:0051384|GO:0032094|GO:0051287|GO:0002017|GO:0005496|GO:0055114	67471283	chr16	67471224	+	hs|16q22.1	NM_000196	chr16:67471224-67471283	NM_000196	Hs.1376
A_33_P3247255	2.13754	1.09595	2.13754	up	TMCO3	transmembrane and coiled-coil domains 3	FALSE	Homo sapiens transmembrane and coiled-coil domains 3 (TMCO3), mRNA [NM_017905]	55002	GO:0015299|GO:0016021	114202728	chr13	114202669	+	hs|13q34	NM_017905	chr13:114202669-114202728	NM_017905	Hs.317593
A_23_P68472	2.43181	1.28203	2.43181	up	DPM1	dolichyl-phosphate mannosyltransferase polypeptide 1, catalytic subunit	FALSE	Homo sapiens dolichyl-phosphate mannosyltransferase polypeptide 1, catalytic subunit (DPM1), mRNA [NM_003859]	8813	GO:0005515|GO:0006501|GO:0004582|GO:0033185|GO:0043178|GO:0005783|GO:0019348|GO:0019673|GO:0005634|GO:0005537|GO:0035269|GO:0035268|GO:0004169|GO:0016020|GO:0005789|GO:0006488|GO:0044267|GO:0006506|GO:0043687|GO:0018279	49552695	chr20	49551725	-	hs|20q13.13	NM_003859	chr20:49552695-49551725	NM_003859	Hs.654951
A_23_P1775	2.01349	1.0097	2.01349	up	DPAGT1	dolichyl-phosphate (UDP-N-acetylglucosamine) N-acetylglucosaminephosphotransferase 1 (GlcNAc-1-P transferase)	FALSE	Homo sapiens dolichyl-phosphate (UDP-N-acetylglucosamine) N-acetylglucosaminephosphotransferase 1 (GlcNAc-1-P transferase) (DPAGT1), mRNA [NM_001382]	1798	GO:0016757|GO:0019408|GO:0030176|GO:0006047|GO:0051259|GO:0043231|GO:0016020|GO:0003975|GO:0005789|GO:0006487|GO:0016021|GO:0006488|GO:0044267|GO:0043687|GO:0000271|GO:0008963|GO:0018279	118967934	chr11	118967875	-	hs|11q23.3	NM_001382	chr11:118967934-118967875	NM_001382	Hs.524081
A_22_P00000845	3.52145	1.81617	3.52145	up	CRHBP	corticotropin releasing hormone binding protein	FALSE	corticotropin releasing hormone binding protein [Source:HGNC Symbol;Acc:HGNC:2356] [ENST00000514258]	1393	GO:0005515|GO:0005783|GO:0051424|GO:2000310|GO:0031045|GO:0005634|GO:0005615|GO:0030425|GO:0005622|GO:0045055|GO:0006954|GO:0035865|GO:0071392|GO:0071356|GO:0001963|GO:0043196|GO:0071277|GO:0007611|GO:0043204|GO:0043679|GO:0051460|GO:0030141|GO:0042277|GO:0007565|GO:0005794|GO:0005771|GO:0005874|GO:0071391|GO:0071314|GO:0033554|GO:0035690|GO:0097211|GO:0002125|GO:0007165|GO:0009755|GO:0048149|GO:…	76276872	chr5	76276813	+	hs|5q13.3		chr5:76276813-76276872
A_24_P82466	2.78807	1.47927	2.78807	up	GAS7	growth arrest-specific 7	FALSE	Homo sapiens growth arrest-specific 7 (GAS7), transcript variant c, mRNA [NM_201433]	8522	GO:0006355|GO:0005737|GO:0051015|GO:0003700|GO:0048812|GO:0008360|GO:0005884|GO:0030041|GO:0007050|GO:0051017|GO:0001726	9814278	chr17	9814219	-	hs|17p13.1	NM_201433	chr17:9814278-9814219	NM_201433	Hs.462214
A_23_P164057	2.23565	1.1607	2.23565	up	MFAP4	microfibrillar-associated protein 4	FALSE	Homo sapiens microfibrillar-associated protein 4 (MFAP4), transcript variant 2, mRNA [NM_002404]	4239	GO:0005515|GO:0009650|GO:0010712|GO:0001527|GO:0005576|GO:0071953|GO:0071493|GO:0031012|GO:0003674|GO:0030198|GO:0043206|GO:0007155|GO:0048251|GO:0070062	19286872	chr17	19286813	-	hs|17p11.2	NM_002404	chr17:19286872-19286813	NM_002404	Hs.296049
A_32_P25050	3.92024	1.97094	3.92024	up	RDH10	retinol dehydrogenase 10 (all-trans)	FALSE	Homo sapiens retinol dehydrogenase 10 (all-trans) (RDH10), mRNA [NM_172037]	157506	GO:0008406|GO:0001656|GO:0007603|GO:0005634|GO:0048703|GO:0043583|GO:0005737|GO:0031076|GO:0060431|GO:0014032|GO:0042574|GO:0042572|GO:0004745|GO:0002138|GO:0052650|GO:0001701|GO:0001523|GO:0044297|GO:0005789|GO:0016021|GO:0035115|GO:0060449|GO:0007601|GO:0043584|GO:0055114	74236519	chr8	74236460	+	hs|8q21.11	NM_172037	chr8:74236460-74236519	NM_172037	Hs.244940
A_33_P3662553	2.63789	1.39939	2.63789	up	YWHAQ	tyrosine 3-monooxygenase/tryptophan 5-monooxygenase activation protein, theta	FALSE	Homo sapiens tyrosine 3-monooxygenase/tryptophan 5-monooxygenase activation protein, theta (YWHAQ), mRNA [NM_006826]	10971	GO:0005515|GO:0007264|GO:0019904|GO:0006915|GO:0006605|GO:0097193|GO:0005829|GO:0005737|GO:1900740|GO:0047485|GO:0016020|GO:0021762|GO:0061024|GO:0005925|GO:0045892|GO:0030659|GO:0070062	9727565	chr2	9725438	-	hs|2p25.1	NM_006826	chr2:9727565-9725438	NM_006826	Hs.74405
A_23_P426663	2.59242	1.3743	2.59242	up	MITF	microphthalmia-associated transcription factor	FALSE	Homo sapiens microphthalmia-associated transcription factor (MITF), transcript variant 1, mRNA [NM_198159]	4286	GO:0005515|GO:0006355|GO:0006366|GO:0003705|GO:0030316|GO:0044336|GO:0030318|GO:0005634|GO:0045670|GO:0000122|GO:0000978|GO:0000979|GO:0001227|GO:0043234|GO:0001077|GO:0045165|GO:0006461|GO:0046849|GO:0045944|GO:0042127|GO:0003682|GO:0046983|GO:0043010|GO:0045893	70017328	chr3	70017269	+	hs|3p13	NM_198159	chr3:70017269-70017328	NM_198159	Hs.166017
A_23_P117157	2.32615	1.21795	2.32615	up	SUCLA2	succinate-CoA ligase, ADP-forming, beta subunit	FALSE	Homo sapiens succinate-CoA ligase, ADP-forming, beta subunit (SUCLA2), mRNA [NM_003850]	8803	GO:0005515|GO:0006099|GO:0044281|GO:0005524|GO:0006781|GO:0046872|GO:0005739|GO:0006105|GO:0005759|GO:0006104|GO:0004775|GO:0044237|GO:0070062	48517447	chr13	48517388	-	hs|13q14.2	NM_003850	chr13:48517447-48517388	NM_003850	Hs.743361
A_23_P89780	2.3283	1.21927	2.3283	up	LAMA3	laminin, alpha 3	FALSE	Homo sapiens laminin, alpha 3 (LAMA3), transcript variant 1, mRNA [NM_198129]	3909	GO:0030334|GO:0034329|GO:0005102|GO:0005606|GO:0005576|GO:0035987|GO:0030155|GO:0005604|GO:0045995|GO:0005610|GO:0008544|GO:0022617|GO:0005198|GO:0030198|GO:0031581|GO:0007155|GO:0070062	21534794	chr18	21534735	+	hs|18q11.2	NM_198129	chr18:21534735-21534794	NM_198129	Hs.436367
A_23_P117727	2.25354	1.1722	2.25354	up	MTFMT	mitochondrial methionyl-tRNA formyltransferase	FALSE	Homo sapiens mitochondrial methionyl-tRNA formyltransferase (MTFMT), mRNA [NM_139242]	123263	GO:0070124|GO:0005739|GO:0032543|GO:0006996|GO:0071951|GO:0004479	65298471	chr15	65297236	-	hs|15q22.31	NM_139242	chr15:65298471-65297236	NM_139242	Hs.531615
A_23_P90804	2.98711	1.57875	2.98711	up	MAP4K4	mitogen-activated protein kinase kinase kinase kinase 4	FALSE	Homo sapiens mitogen-activated protein kinase kinase kinase kinase 4 (MAP4K4), transcript variant 2, mRNA [NM_145686]	9448	GO:0046328|GO:0035556|GO:0023014|GO:0005515|GO:0050790|GO:0005737|GO:0005083|GO:0004702|GO:0004674|GO:0030033|GO:0006468|GO:0005524	102510777	chr2	102510718	+	hs|2q11.2	NM_145686	chr2:102510718-102510777	NM_145686	Hs.701013
A_23_P324327	3.72075	1.89559	3.72075	up	GPRC5B	G protein-coupled receptor, class C, group 5, member B	FALSE	Homo sapiens G protein-coupled receptor, class C, group 5, member B (GPRC5B), mRNA [NM_016235]	51704	GO:0001664|GO:0005886|GO:0009986|GO:0019901|GO:0004930|GO:0061098|GO:0090263|GO:0005730|GO:0005634|GO:0042593|GO:0030295|GO:0005615|GO:0043231|GO:0007186|GO:0045666|GO:0050729|GO:0010976|GO:0060907|GO:0045121|GO:0007626|GO:0016021|GO:0043123|GO:0030659|GO:0070062	19870688	chr16	19870629	-	hs|16p12.3	NM_016235	chr16:19870688-19870629	NM_016235	Hs.148685
A_23_P114740	4.5354	2.18123	4.5354	up	CFH	complement factor H	FALSE	Homo sapiens complement factor H (CFH), transcript variant 1, mRNA [NM_000186]	3075	GO:0006957|GO:0005515|GO:0030449|GO:0006956|GO:0045087|GO:0072562|GO:0043395|GO:0005576|GO:0008201|GO:0005615|GO:0070062	196716609	chr1	196716550	+	hs|1q31.3	NM_000186	chr1:196716550-196716609	NM_000186	Hs.363396
A_33_P3323453	2.08981	1.06337	2.08981	up	HM13	histocompatibility (minor) 13	FALSE	Homo sapiens histocompatibility (minor) 13 (HM13), transcript variant 1, mRNA [NM_030789]	81502	GO:0005515|GO:0005791|GO:0005886|GO:0009986|GO:0005783|GO:0031293|GO:0071458|GO:0042500|GO:0042803|GO:0016020|GO:0033619|GO:0071556|GO:0008233|GO:0006509|GO:0031625	30137134	chr20	30137075	+	hs|20q11.21	NM_030789	chr20:30137075-30137134	NM_030789	Hs.373741
A_24_P226008	2.38009	1.25102	2.38009	up	MGLL	monoglyceride lipase	FALSE	Homo sapiens monoglyceride lipase (MGLL), transcript variant 1, mRNA [NM_007283]	11343	GO:0019369|GO:0006629|GO:0005886|GO:0045202|GO:0060292|GO:0044281|GO:2000124|GO:0042803|GO:0008289|GO:0030516|GO:0006954|GO:0004622|GO:0043196|GO:0047372|GO:0006633|GO:0019433|GO:0046464|GO:0050727|GO:0030168|GO:0009966|GO:0007596|GO:0005789|GO:0005654|GO:0036155|GO:0006644|GO:0046474|GO:0051930	127413832	chr3	127411122	-	hs|3q21.3	NM_007283	chr3:127413832-127411122	NM_007283	Hs.277035
A_24_P261052	2.01862	1.01337	2.01862	up	MTMR9	myotubularin related protein 9	FALSE	Homo sapiens myotubularin related protein 9 (MTMR9), mRNA [NM_015458]	66036	GO:0005515|GO:0016791|GO:0050790|GO:0005737|GO:0016311|GO:0030234	11184904	chr8	11184845	+	hs|8p23.1	NM_015458	chr8:11184845-11184904	NM_015458	Hs.591395
A_23_P6771	2.64235	1.40182	2.64235	up	LMCD1	LIM and cysteine-rich domains 1	FALSE	Homo sapiens LIM and cysteine-rich domains 1 (LMCD1), transcript variant 1, mRNA [NM_014583]	29995	GO:0031012|GO:0005737|GO:0003714|GO:0008270|GO:0005634|GO:0000122|GO:0070886|GO:0010611|GO:0005615|GO:0006351	8609747	chr3	8609688	+	hs|3p26.1	NM_014583	chr3:8609688-8609747	NM_014583	Hs.475353
A_23_P98898	2.20058	1.13788	2.20058	up	CDK2	cyclin-dependent kinase 2	FALSE	Homo sapiens cyclin-dependent kinase 2 (CDK2), transcript variant 1, mRNA [NM_001798]	1017	GO:0005515|GO:0032298|GO:0000793|GO:0008284|GO:0015030|GO:0071732|GO:0005634|GO:0007265|GO:0031145|GO:0046872|GO:0005829|GO:0000082|GO:0005737|GO:0000086|GO:0006813|GO:0006977|GO:0000806|GO:0005667|GO:0000781|GO:0005813|GO:0030332|GO:0000805|GO:0016572|GO:0005524|GO:0051439|GO:0006260|GO:0051298|GO:0035173|GO:0007067|GO:0006281|GO:0007126|GO:0060968|GO:0007596|GO:0000307|GO:0005654|GO:0031571|GO:…	56365848	chr12	56365789	+	hs|12q13.2	NM_001798	chr12:56365789-56365848	NM_001798	Hs.19192
A_24_P305678	2.5247	1.33611	2.5247	up	PITPNB	phosphatidylinositol transfer protein, beta	FALSE	Homo sapiens phosphatidylinositol transfer protein, beta (PITPNB), transcript variant sp1, mRNA [NM_012399]	23760	GO:0006629|GO:0015914|GO:0000139|GO:0005789|GO:0044281|GO:0006644|GO:0001701|GO:0070062|GO:0046474|GO:0008289	28247999	chr22	28247940	-	hs|22q12.1	NM_012399	chr22:28247999-28247940	NM_012399	Hs.705323
A_23_P41804	2.02872	1.02057	2.02872	up	NKD2	naked cuticle homolog 2 (Drosophila)	FALSE	Homo sapiens naked cuticle homolog 2 (Drosophila) (NKD2), transcript variant 1, mRNA [NM_033120]	85409	GO:0005515|GO:0072661|GO:0005509|GO:0032436|GO:0031410|GO:0006887|GO:0016328|GO:0071944|GO:0016323|GO:0010954|GO:0019838|GO:0048210|GO:0016023|GO:0016055|GO:0090090|GO:0031625|GO:0090004	1038778	chr5	1038719	+	hs|5p15.33	NM_033120	chr5:1038719-1038778	NM_033120	Hs.240951
A_23_P101208	2.12922	1.09033	2.12922	up	CYB5A	cytochrome b5 type A (microsomal)	FALSE	Homo sapiens cytochrome b5 type A (microsomal) (CYB5A), transcript variant 2, mRNA [NM_001914]	1528	GO:0004129|GO:0006767|GO:0005741|GO:0044281|GO:0046872|GO:0019852|GO:0004033|GO:0016020|GO:0006766|GO:0005789|GO:0016021|GO:0019899|GO:0046686|GO:0070062|GO:0055114|GO:0020037	71920777	chr18	71920718	-	hs|18q22.3	NM_001914	chr18:71920777-71920718	NM_001914	Hs.465413
A_23_P139558	2.26306	1.17828	2.26306	up	TBC1D15	TBC1 domain family, member 15	FALSE	Homo sapiens TBC1 domain family, member 15 (TBC1D15), transcript variant 1, mRNA [NM_022771]	64786	GO:0005739|GO:0005515|GO:0032313|GO:0005737|GO:0032851|GO:0005097|GO:0070062	72316994	chr12	72316935	+	hs|12q21.1	NM_022771	chr12:72316935-72316994	NM_022771	Hs.284630
A_33_P3233135	2.76438	1.46695	2.76438	up	KIF16B	kinesin family member 16B	FALSE	Homo sapiens kinesin family member 16B (KIF16B), transcript variant 1, mRNA [NM_001199866]	55614	GO:0001704|GO:0008017|GO:0017137|GO:0005871|GO:0043325|GO:0005874|GO:0080025|GO:0005547|GO:0032266|GO:0045022|GO:0005524|GO:0006895|GO:0001919|GO:0007173|GO:0007492|GO:0008543|GO:0032801|GO:0031901|GO:0008574|GO:0016887|GO:0005769|GO:0005768|GO:0007018	16347850	chr20	16347791	-	hs|20p12.1	NM_001199866	chr20:16347850-16347791	NM_001199866	Hs.101774
A_32_P44568	3.0729	1.6196	3.0729	up	LDHA	lactate dehydrogenase A	FALSE	Homo sapiens lactate dehydrogenase A (LDHA), transcript variant 1, mRNA [NM_005566]	3939	GO:0005515|GO:0044262|GO:0005634|GO:0044281|GO:0006096|GO:0005829|GO:0005739|GO:0004459|GO:0016020|GO:0006090|GO:0021762|GO:0035686|GO:0031668|GO:0044237|GO:0070062|GO:0055114	14921876	chr9	14921817	-	hs|9p22.3	NM_005566	chr9:014921876-014921817	NM_005566	Hs.2795
A_33_P3333360	2.49433	1.31865	2.49433	up	CDIP1	cell death-inducing p53 target 1	FALSE	Homo sapiens cell death-inducing p53 target 1 (CDIP1), transcript variant 1, mRNA [NM_001199054]	29965	GO:0042771|GO:0003674|GO:0006915|GO:0005634|GO:0033209	4562678	chr16	4562619	-	hs|16p13.3	NM_001199054	chr16:4562678-4562619	NM_001199054	Hs.654653
A_23_P100654	2.1024	1.07204	2.1024	up	ZBTB4	zinc finger and BTB domain containing 4	FALSE	Homo sapiens zinc finger and BTB domain containing 4 (ZBTB4), transcript variant 1, mRNA [NM_020899]	57659	GO:0005515|GO:0008327|GO:0000977|GO:0019901|GO:0010428|GO:0005634|GO:0000122|GO:0001227|GO:0046872|GO:0006351|GO:0006974|GO:0042803|GO:0043565|GO:0045892	7363005	chr17	7362946	-	hs|17p13.1	NM_020899	chr17:7363005-7362946	NM_020899	Hs.35096
A_33_P3321657	2.26548	1.17982	2.26548	up	HSPG2	heparan sulfate proteoglycan 2	FALSE	Homo sapiens heparan sulfate proteoglycan 2 (HSPG2), transcript variant 1, mRNA [NM_001291860]	3339	GO:0005515|GO:0005886|GO:0007603|GO:0048704|GO:0044281|GO:0005615|GO:0046872|GO:0008104|GO:0022617|GO:0002062|GO:0030198|GO:0060351|GO:0030204|GO:0030203|GO:0070062|GO:0043202|GO:0005975|GO:0005796|GO:0005605|GO:0006027|GO:0005576|GO:0001525|GO:0008022|GO:0001523|GO:0006024|GO:0048738|GO:0031012|GO:0001958|GO:0007420|GO:0009405|GO:0042157|GO:0005925	22148799	chr1	22148740	-	hs|1p36.12	NM_001291860	chr1:22148799-22148740	NM_001291860	Hs.562227
A_23_P159255	2.27207	1.18401	2.27207	up	PTPRM	protein tyrosine phosphatase, receptor type, M	FALSE	Homo sapiens protein tyrosine phosphatase, receptor type, M (PTPRM), transcript variant 2, mRNA [NM_002845]	5797	GO:0031290|GO:0005515|GO:0048471|GO:0045296|GO:0042493|GO:0010842|GO:0035335|GO:0031175|GO:0030027|GO:0042802|GO:0007165|GO:0010596|GO:0005737|GO:0005913|GO:0006470|GO:0001937|GO:0005001|GO:0005887|GO:0005911|GO:0045909|GO:0016525|GO:0007156|GO:0004725	8406457	chr18	8406398	+	hs|18p11.23	NM_002845	chr18:8406398-8406457	NM_002845	Hs.49774
A_32_P98072	2.59071	1.37335	2.59071	up	TCHH	trichohyalin	FALSE	Homo sapiens trichohyalin (TCHH), mRNA [NM_007113]	7062	GO:0008150|GO:0005509|GO:0031424|GO:0005856	152078925	chr1	152078866	-	hs|1q21.3	NM_007113	chr1:152078925-152078866	NM_007113	Hs.432416
A_23_P158880	2.32626	1.21801	2.32626	up	STARD5	StAR-related lipid transfer (START) domain containing 5	FALSE	Homo sapiens StAR-related lipid transfer (START) domain containing 5 (STARD5), mRNA [NM_181900]	80765	GO:0032052|GO:0006869|GO:0006700|GO:0044281|GO:0008202|GO:0005829	81605262	chr15	81605203	-	hs|15q25.1	NM_181900	chr15:81605262-81605203	NM_181900	Hs.513075
A_23_P253932	2.08471	1.05985	2.08471	up	FAIM	Fas apoptotic inhibitory molecule	FALSE	Homo sapiens Fas apoptotic inhibitory molecule (FAIM), transcript variant 1, mRNA [NM_001033030]	55179	GO:0043066|GO:0005737|GO:0006915	138351873	chr3	138351814	+	hs|3q22.3	NM_001033030	chr3:138351814-138351873	NM_001033030	Hs.173438
A_33_P3246108	2.02269	1.01628	2.02269	up	APOLD1	apolipoprotein L domain containing 1	FALSE	Homo sapiens apolipoprotein L domain containing 1 (APOLD1), transcript variant 1, mRNA [NM_001130415]	81575	GO:0001666|GO:0005886|GO:0006869|GO:0042157|GO:0042118|GO:0005576|GO:0016021|GO:0001525|GO:0030154|GO:0045601|GO:0008289	12940389	chr12	12940330	+	hs|12p13.1	NM_001130415	chr12:12940330-12940389	NM_001130415	Hs.23388
A_24_P935103	2.24332	1.16563	2.24332	up	ADCY9	adenylate cyclase 9	FALSE	Homo sapiens adenylate cyclase 9 (ADCY9), mRNA [NM_001116]	115	GO:0048011|GO:0005886|GO:0007268|GO:0044281|GO:0007202|GO:0055085|GO:0005524|GO:0007193|GO:0046872|GO:0035556|GO:0003091|GO:0007165|GO:0004016|GO:0006112|GO:0007173|GO:0071377|GO:0008543|GO:0005887|GO:0045087|GO:0006171|GO:0006833|GO:0007189|GO:0034199	4012826	chr16	4012767	-	hs|16p13.3	NM_001116	chr16:4012826-4012767	NM_001116	Hs.391860
A_33_P3322804	4.13254	2.04703	4.13254	up	NTRK2	neurotrophic tyrosine kinase, receptor, type 2	FALSE	Homo sapiens neurotrophic tyrosine kinase, receptor, type 2 (NTRK2), transcript variant f, mRNA [NM_001291937]	4915	GO:0035584|GO:0048709|GO:0010996|GO:0060291|GO:2000811|GO:0042803|GO:0043524|GO:0032314|GO:0046777|GO:0045211|GO:0071356|GO:0009416|GO:0007612|GO:0005791|GO:0048786|GO:0048403|GO:0009986|GO:0007616|GO:0051968|GO:0007568|GO:0046548|GO:0046928|GO:0018108|GO:0014068|GO:0060076|GO:0043235|GO:0046875|GO:0005887|GO:0010976|GO:0060175|GO:0050773|GO:0048935|GO:0007623|GO:0050772|GO:0010008|GO:0007631|GO:…	87366999	chr9	87366940	+	hs|9q21.33	NM_001291937	chr9:87366940-87366999	NM_001291937	Hs.494312
A_23_P156209	2.68824	1.42666	2.68824	up	ZNF622	zinc finger protein 622	FALSE	Homo sapiens zinc finger protein 622 (ZNF622), mRNA [NM_033414]	90441	GO:0005515|GO:0033674|GO:0005737|GO:0043065|GO:0005794|GO:0008631|GO:0046330|GO:0005730|GO:0008270|GO:0043410	16458670	chr5	16453251	-	hs|5p15.1	NM_033414	chr5:16458670-16453251	NM_033414	Hs.60300
A_23_P144807	2.08809	1.06218	2.08809	up	2017-09-08	septin 8	FALSE	Homo sapiens septin 8 (SEPT8), transcript variant 1, mRNA [NM_001098811]	23176	GO:0005515|GO:0007049|GO:0005737|GO:0005856|GO:0005525	132086875	chr5	132086816	-	hs|5q31.1	NM_001098811	chr5:132086875-132086816	NM_001098811	Hs.522057
A_33_P3383233	2.05138	1.0366	2.05138	up	NDRG2	NDRG family member 2	FALSE	Homo sapiens NDRG family member 2 (NDRG2), transcript variant 11, mRNA [NM_001282213]	57447	GO:0005515|GO:0048471|GO:0005813|GO:0005794|GO:0005815|GO:0048662|GO:0001818|GO:0010574|GO:0030154|GO:0030426|GO:0005829|GO:0003674|GO:0005737|GO:0021762|GO:0090361|GO:0070373|GO:0005654|GO:0016055|GO:0070062	21485301	chr14	21485242	-	hs|14q11.2	NM_001282213	chr14:21485301-21485242	NM_001282213	Hs.525205
A_23_P159227	2.02807	1.02011	2.02807	up	ADAM15	ADAM metallopeptidase domain 15	FALSE	Homo sapiens ADAM metallopeptidase domain 15 (ADAM15), transcript variant 1, mRNA [NM_207191]	8751	GO:0005515|GO:0017124|GO:0030308|GO:0005886|GO:0042995|GO:0042246|GO:0060317|GO:0005912|GO:0022617|GO:0030198|GO:0030574|GO:0006508|GO:1900121|GO:0070062|GO:0030336|GO:0001669|GO:0009986|GO:0006915|GO:0001525|GO:0070528|GO:0005178|GO:0007160|GO:0007229|GO:0045087|GO:0008270|GO:0016021|GO:0004222|GO:0008237|GO:0001953	155030598	chr1	155030539	+	hs|1q22	NM_207191	chr1:155030539-155030598	NM_207191	Hs.312098
A_23_P153320	8.20654	3.03677	8.20654	up	ICAM1	intercellular adhesion molecule 1	FALSE	Homo sapiens intercellular adhesion molecule 1 (ICAM1), mRNA [NM_000201]	3383	GO:0005515|GO:0014070|GO:0008360|GO:0007605|GO:0019221|GO:0050731|GO:0050900|GO:0005615|GO:0030155|GO:0030838|GO:1900027|GO:0001618|GO:0030198|GO:0071356|GO:0031669|GO:0051926|GO:0070374|GO:0070062|GO:0060333|GO:0009986|GO:0007569|GO:0071312|GO:0005178|GO:0005887|GO:0032321|GO:0071347|GO:0050776|GO:0046688|GO:0005925|GO:0002457|GO:0009897|GO:0004888|GO:0002438|GO:0033627|GO:0005886|GO:0045471|GO:…	10396358	chr19	10396298	+	hs|19p13.2	NM_000201	chr19:10396298-10396358	NM_000201	Hs.643447
A_22_P00008141	3.24446	1.69798	3.24446	up	lnc-IL5RA-6	lnc-IL5RA-6:1	FALSE	LNCipedia lincRNA (lnc-IL5RA-6), lincRNA [lnc-IL5RA-6:1]			237500	chr3	237441	-	hs|3p26.3		chr3:237500-237441
A_23_P212639	5.14888	2.36426	5.14888	up	TRA2B	transformer 2 beta homolog (Drosophila)	FALSE	Homo sapiens transformer 2 beta homolog (Drosophila) (TRA2B), transcript variant 1, mRNA [NM_004593]	6434	GO:0048026|GO:0005515|GO:0000166|GO:0000398|GO:0000381|GO:0000375|GO:0005634|GO:0003729	185635336	chr3	185635277	-	hs|3q27.2	NM_004593	chr3:185635336-185635277	NM_004593	Hs.533122
A_33_P3310475	2.70571	1.43601	2.70571	up	2017-09-11	septin 11	FALSE	Homo sapiens septin 11 (SEPT11), mRNA [NM_018243]	55752	GO:0005515|GO:0030424|GO:0007049|GO:0005737|GO:0001725|GO:0030054|GO:0043197|GO:0045202|GO:0005525|GO:0051291|GO:0070062|GO:0051301	77959767	chr4	77959708	+	hs|4q21.1	NM_018243	chr4:77959708-77959767	NM_018243	Hs.128199
A_23_P127948	4.28492	2.09927	4.28492	up	ADM	adrenomedullin	FALSE	Homo sapiens adrenomedullin (ADM), mRNA [NM_001124]	133	GO:0005515|GO:0008284|GO:0031700|GO:0008285|GO:2001214|GO:0006701|GO:0060712|GO:0031102|GO:0008015|GO:0060670|GO:0031100|GO:0030819|GO:0009409|GO:0007267|GO:0005615|GO:0007204|GO:0031623|GO:0007507|GO:0005737|GO:0048589|GO:0042594|GO:0045906|GO:0045909|GO:0032496|GO:0042475|GO:0006171|GO:0032868|GO:0001666|GO:0007565|GO:0043065|GO:0008209|GO:0007568|GO:0005102|GO:0009611|GO:0001843|GO:0051384|GO:…	10328839	chr11	10328780	+	hs|11p15.4	NM_001124	chr11:10328780-10328839	NM_001124	Hs.441047
A_23_P421379	2.11929	1.08358	2.11929	up	IGF2	insulin-like growth factor 2	FALSE	Homo sapiens insulin-like growth factor 2 (IGF2), transcript variant 1, mRNA [NM_000612]	3481	GO:0005515|GO:0005159|GO:0005158|GO:0050731|GO:0005615|GO:0009887|GO:0031667|GO:0007613|GO:0032355|GO:0070062|GO:2000467|GO:0007565|GO:0030168|GO:0007275|GO:0045840|GO:0038028|GO:0043085|GO:0001649|GO:0001501|GO:0005179|GO:0030546|GO:0043539|GO:0008083|GO:0044267|GO:0051146|GO:0008286|GO:0051897|GO:0008284|GO:0005886|GO:0071902|GO:0045471|GO:2000273|GO:0042104|GO:0045944|GO:0006006|GO:0031093|GO:…	2154754	chr11	2154402	-	hs|11p15.5	NM_000612	chr11:2154754-2154402	NM_000612	Hs.272259
A_33_P3346132	2.33887	1.22581	2.33887	up	RUFY2	RUN and FYVE domain containing 2	FALSE	Homo sapiens RUN and FYVE domain containing 2 (RUFY2), transcript variant 1, mRNA [NM_017987]	55680	GO:0005634|GO:0046872	70103386	chr10	70103327	-	hs|10q21.3	NM_017987	chr10:70103386-70103327	NM_017987	Hs.653144
A_23_P88522	2.65845	1.41059	2.65845	up	NMB	neuromedin B	FALSE	Homo sapiens neuromedin B (NMB), transcript variant 1, mRNA [NM_021077]	4828	GO:0031710|GO:0043005|GO:0008284|GO:0007267|GO:0005576|GO:0042593|GO:0007204|GO:0046888|GO:0007165|GO:0005179|GO:0007218|GO:0046887|GO:0050482	85198461	chr15	85198402	-	hs|15q25.2	NM_021077	chr15:85198461-85198402	NM_021077	Hs.386470
A_24_P97825	2.00345	1.00249	2.00345	up	CCDC69	coiled-coil domain containing 69	FALSE	Homo sapiens coiled-coil domain containing 69 (CCDC69), mRNA [NM_015621]	26112		150561538	chr5	150561479	-	hs|5q33.1	NM_015621	chr5:150561538-150561479	NM_015621	Hs.655336
A_24_P383609	2.10548	1.07415	2.10548	up	NANOS1	nanos homolog 1 (Drosophila)	FALSE	Homo sapiens nanos homolog 1 (Drosophila) (NANOS1), mRNA [NM_199461]	340719	GO:0017148|GO:0005515|GO:0048471|GO:0005737|GO:0016477|GO:1900153|GO:0003723|GO:0010631|GO:0008270|GO:0030371	120790926	chr10	120790867	+	hs|10q26.11	NM_199461	chr10:120790867-120790926	NM_199461	Hs.591918
A_24_P345822	2.92572	1.54879	2.92572	up	TFG	TRK-fused gene	FALSE	Homo sapiens TRK-fused gene (TFG), transcript variant 1, mRNA [NM_006070]	10342	GO:0005515|GO:0007165|GO:0005737|GO:0004871|GO:0043123|GO:0070062|GO:0042802	100467021	chr3	100463745	+	hs|3q12.2	NM_006070	chr3:100463745-100467021	NM_006070	Hs.518123
A_23_P127233	2.80642	1.48873	2.80642	up	SMNDC1	survival motor neuron domain containing 1	FALSE	Homo sapiens survival motor neuron domain containing 1 (SMNDC1), mRNA [NM_005871]	10285	GO:0005515|GO:0006397|GO:0008380|GO:0000245|GO:0015030|GO:0006915|GO:0005634|GO:0005737|GO:0016607|GO:0000375|GO:0005654|GO:0005681|GO:0045111	112052932	chr10	112052873	-	hs|10q25.2	NM_005871	chr10:112052932-112052873	NM_005871	Hs.632093
A_23_P19322	2.5509	1.351	2.5509	up	SAYSD1	SAYSVFN motif domain containing 1	FALSE	Homo sapiens SAYSVFN motif domain containing 1 (SAYSD1), mRNA [NM_018322]	55776	GO:0016021|GO:0030659|GO:0043231	39071944	chr6	39071885	-	hs|6p21.2	NM_018322	chr6:39071944-39071885	NM_018322	Hs.58382
A_33_P3340718	3.18806	1.67268	3.18806	up	KDM6A	lysine (K)-specific demethylase 6A	FALSE	Homo sapiens lysine (K)-specific demethylase 6A (KDM6A), transcript variant 1, mRNA [NM_001291415]	7403	GO:0010468|GO:0006325|GO:0001843|GO:0051213|GO:0005634|GO:0000978|GO:0001701|GO:0048570|GO:0046872|GO:0042802|GO:0003007|GO:0003016|GO:0035097|GO:0032525|GO:0035264|GO:0071557|GO:0005654|GO:0048333|GO:0060070|GO:0051568|GO:0071558|GO:0055114	44971094	chrX	44971035	+	hs|Xp11.3	NM_001291415	chrX:44971035-44971094	NM_001291415	Hs.522616
A_33_P3298980	2.00347	1.0025	2.00347	up			FALSE				138734075	chr7	138734016	-	hs|7q34		chr7:138734075-138734016
A_32_P749354	2.15243	1.10596	2.15243	up	EIF1AD	eukaryotic translation initiation factor 1A domain containing	FALSE	Homo sapiens eukaryotic translation initiation factor 1A domain containing (EIF1AD), transcript variant 3, mRNA [NM_032325]	84285	GO:0003743|GO:0005654|GO:0045111|GO:0006413|GO:0043231	65764297	chr11	65764238	-	hs|11q13.1	NM_032325	chr11:65764297-65764238	NM_032325	Hs.425178
A_23_P10870	2.97027	1.57059	2.97027	up	DOLK	dolichol kinase	FALSE	Homo sapiens dolichol kinase (DOLK), mRNA [NM_014908]	22845	GO:0016310|GO:0004168|GO:0005789|GO:0030176|GO:0006488|GO:0044267|GO:0043048|GO:0006489|GO:0043687|GO:0018279	131708168	chr9	131708109	-	hs|9q34.11	NM_014908	chr9:131708168-131708109	NM_014908	Hs.531563
A_23_P121215	2.15872	1.11017	2.15872	up	CAMK1	calcium/calmodulin-dependent protein kinase I	FALSE	Homo sapiens calcium/calmodulin-dependent protein kinase I (CAMK1), mRNA [NM_003656]	8536	GO:0005515|GO:0005516|GO:0071902|GO:0043393|GO:0005634|GO:0005524|GO:0006913|GO:0046827|GO:0032880|GO:0007165|GO:0005737|GO:0007049|GO:0051149|GO:0051835|GO:0010976|GO:0006468|GO:0004683|GO:0060999|GO:0051147	9802404	chr3	9802345	-	hs|3p25.3	NM_003656	chr3:9802404-9802345	NM_003656	Hs.434875
A_23_P319617	2.14663	1.10208	2.14663	up	CHST7	carbohydrate (N-acetylglucosamine 6-O) sulfotransferase 7	FALSE	Homo sapiens carbohydrate (N-acetylglucosamine 6-O) sulfotransferase 7 (CHST7), mRNA [NM_019886]	56548	GO:0006790|GO:0005976|GO:0005975|GO:0006044|GO:0008459|GO:0044281|GO:0030206|GO:0000139|GO:0009405|GO:0001517|GO:0016021|GO:0030204|GO:0030203	46457467	chrX	46457408	+	hs|Xp11.23	NM_019886	chrX:46457408-46457467	NM_019886	Hs.129955
A_23_P113803	3.27758	1.71263	3.27758	up	KATNA1	katanin p60 (ATPase containing) subunit A 1	FALSE	Homo sapiens katanin p60 (ATPase containing) subunit A 1 (KATNA1), transcript variant 1, mRNA [NM_007044]	11104	GO:0005515|GO:0008017|GO:0030424|GO:0005886|GO:0001578|GO:0005634|GO:0031122|GO:0030426|GO:0051013|GO:0005737|GO:0008104|GO:0043025|GO:0005811|GO:0005813|GO:0046982|GO:0005815|GO:0005874|GO:0005819|GO:0030496|GO:0005524|GO:0008568|GO:0000922|GO:0007067|GO:0045502|GO:0008152|GO:0010977|GO:0005654|GO:0001764|GO:0051301	149916283	chr6	149916224	-	hs|6q25.1	NM_007044	chr6:149916283-149916224	NM_007044	Hs.450175
A_33_P3223713	2.37862	1.25012	2.37862	up	UBE2E3	ubiquitin-conjugating enzyme E2E 3	FALSE	Homo sapiens ubiquitin-conjugating enzyme E2E 3 (UBE2E3), transcript variant 1, mRNA [NM_006357]	10477	GO:0070534|GO:0005737|GO:0004842|GO:0070979|GO:0016874|GO:0005634|GO:0070936|GO:0005524|GO:0040008	181846962	chr2	181846903	+	hs|2q31.3	NM_006357	chr2:181846903-181846962	NM_006357	Hs.470804
A_24_P406714	2.17077	1.11821	2.17077	up	MLLT10	myeloid/lymphoid or mixed-lineage leukemia (trithorax homolog, Drosophila); translocated to, 10	FALSE	Homo sapiens myeloid/lymphoid or mixed-lineage leukemia (trithorax homolog, Drosophila); translocated to, 10 (MLLT10), transcript variant 1, mRNA [NM_004641]	8028	GO:0005515|GO:0005737|GO:0003700|GO:0045944|GO:0008270|GO:0005654|GO:0003677|GO:0006351	22032019	chr10	22031960	+	hs|10p12.31	NM_004641	chr10:22031960-22032019	NM_004641	Hs.30385
A_23_P149775	2.43204	1.28217	2.43204	up	ARHGAP12	Rho GTPase activating protein 12	FALSE	Homo sapiens Rho GTPase activating protein 12 (ARHGAP12), transcript variant 1, mRNA [NM_018287]	94134	GO:0043547|GO:0051056|GO:0007264|GO:0002011|GO:0005829|GO:0005096	32095364	chr10	32095305	-	hs|10p11.22	NM_018287	chr10:32095364-32095305	NM_018287	Hs.499264
A_23_P215566	2.57569	1.36496	2.57569	up	AHR	aryl hydrocarbon receptor	FALSE	Homo sapiens aryl hydrocarbon receptor (AHR), mRNA [NM_001621]	196	GO:0005515|GO:0010468|GO:0003700|GO:0006805|GO:0044212|GO:0006366|GO:0045899|GO:0003705|GO:0051879|GO:0005634|GO:0005737|GO:0045944|GO:0046983|GO:0030850|GO:0004879|GO:0004871|GO:0009410|GO:0005667|GO:0006355|GO:0001568|GO:0046982|GO:0006357|GO:0006915|GO:0009636|GO:0070888|GO:0030888|GO:0000122|GO:0003677|GO:0035326|GO:0032922|GO:0043565|GO:0007049|GO:0034753|GO:0034752|GO:0005654|GO:0045893|GO:…	17385058	chr7	17384999	+	hs|7p21.1	NM_001621	chr7:17384999-17385058	NM_001621	Hs.171189
A_33_P3259722	2.17299	1.11968	2.17299	up	TMEM222	transmembrane protein 222	FALSE	Homo sapiens transmembrane protein 222 (TMEM222), transcript variant 1, mRNA [NM_032125]	84065	GO:0016021	27657275	chr1	27657216	+	hs|1p36.11	NM_032125	chr1:27657216-27657275	NM_032125	Hs.469171
A_23_P422933	2.54087	1.34532	2.54087	up	ARHGAP20	Rho GTPase activating protein 20	FALSE	Homo sapiens Rho GTPase activating protein 20 (ARHGAP20), transcript variant 1, mRNA [NM_020809]	57569	GO:0043547|GO:0051056|GO:0007264|GO:0005829|GO:0005096	110448123	chr11	110448064	-	hs|11q23.1	NM_020809	chr11:110448123-110448064	NM_020809	Hs.6136
A_23_P203888	3.22835	1.6908	3.22835	up	MMP19	matrix metallopeptidase 19	FALSE	Homo sapiens matrix metallopeptidase 19 (MMP19), transcript variant 1, mRNA [NM_002429]	4327	GO:0005509|GO:0005578|GO:0001554|GO:0001542|GO:0005576|GO:0001525|GO:0051591|GO:0030154|GO:0001541|GO:0022617|GO:0030198|GO:0030574|GO:0006508|GO:0008270|GO:0009725|GO:0004222	56230495	chr12	56230436	-	hs|12q13.2	NM_002429	chr12:56230495-56230436	NM_002429	Hs.591033
A_23_P24104	3.21571	1.68514	3.21571	up	PLAU	plasminogen activator, urokinase	FALSE	Homo sapiens plasminogen activator, urokinase (PLAU), transcript variant 1, mRNA [NM_002658]	5328	GO:0005515|GO:0033628|GO:0001666|GO:0010469|GO:0004252|GO:0005886|GO:0009986|GO:0014910|GO:0014909|GO:0005576|GO:2000097|GO:0005615|GO:0061041|GO:0007165|GO:0006935|GO:0007596|GO:0042127|GO:0006508|GO:0042730|GO:0005925|GO:0070062	75677109	chr10	75677050	+	hs|10q22.2	NM_002658	chr10:75677050-75677109	NM_002658	Hs.77274
A_33_P3341676	2.22486	1.15372	2.22486	up	MEF2A	myocyte enhancer factor 2A	FALSE	Homo sapiens myocyte enhancer factor 2A (MEF2A), transcript variant 5, mRNA [NM_001171894]	4205	GO:0005515|GO:0000790|GO:0003700|GO:0006366|GO:0003705|GO:0000981|GO:0046332|GO:0051403|GO:0007507|GO:0042692|GO:0002756|GO:0000165|GO:0002755|GO:0070375|GO:0055005|GO:0061337|GO:0035035|GO:0048311|GO:0001105|GO:0000977|GO:0038124|GO:0019901|GO:0038123|GO:0046982|GO:0034134|GO:0000122|GO:0000978|GO:0002224|GO:0007517|GO:0051149|GO:0045087|GO:0005654|GO:0034166|GO:0035666|GO:0034162|GO:0034142|GO:…	100256545	chr15	100256486	+	hs|15q26.3	NM_001171894	chr15:100256486-100256545	NM_001171894	Hs.268675
A_33_P3299220	2.60925	1.38364	2.60925	up	ADAMTSL4	ADAMTS-like 4	FALSE	Homo sapiens ADAMTS-like 4 (ADAMTSL4), transcript variant 2, mRNA [NM_025008]	54507	GO:0005515|GO:0043065|GO:0006915|GO:0005575|GO:0002020|GO:0005614|GO:0036066|GO:0006493|GO:0030198|GO:0006508|GO:0005788|GO:0004222|GO:0044267|GO:0043687	150531200	chr1	150531141	+	hs|1q21.3	NM_025008	chr1:150531141-150531200	NM_025008	Hs.516243
A_21_P0000418	3.48446	1.80093	3.48446	up	SNORD114-21	small nucleolar RNA, C/D box 114-21	FALSE	Homo sapiens small nucleolar RNA, C/D box 114-21 (SNORD114-21), small nucleolar RNA [NR_003214]	767599		101448377	chr14	101448318	+	hs|14q32.31	NR_003214	chr14:101448318-101448377	NR_003214
A_24_P252575	2.0266	1.01906	2.0266	up	RABGAP1	RAB GTPase activating protein 1	FALSE	Homo sapiens RAB GTPase activating protein 1 (RABGAP1), mRNA [NM_012197]	23637	GO:0005515|GO:0005813|GO:0017137|GO:0005875|GO:0032851|GO:0003677|GO:0005829|GO:0043547|GO:0007049|GO:0015631|GO:0033124|GO:0005097|GO:0005096	125866412	chr9	125866353	+	hs|9q33.3	NM_012197	chr9:125866353-125866412	NM_012197	Hs.271341
A_33_P3296181	3.45534	1.78883	3.45534	up	CCL3L3	chemokine (C-C motif) ligand 3-like 3	FALSE	Homo sapiens chemokine (C-C motif) ligand 3-like 3 (CCL3L3), mRNA [NM_001001437]	414062	GO:0008009|GO:0006955|GO:0008285|GO:0006954|GO:0060326|GO:0005576|GO:0005615	34524139	chr17	34524080	-	hs|17q12	NM_001001437	chr17:34524139-34524080	NM_001001437	Hs.454713
A_33_P3359115	2.21018	1.14416	2.21018	up	LMBRD1	LMBR1 domain containing 1	FALSE	Homo sapiens LMBR1 domain containing 1 (LMBRD1), mRNA [NM_018368]	55788	GO:0051898|GO:0009235|GO:0005886|GO:0031419|GO:0046627|GO:0005158|GO:0006767|GO:0038016|GO:0044281|GO:0005765|GO:0045334|GO:0016020|GO:0006766|GO:0046325|GO:0016032|GO:0016021	70385838	chr6	70385779	-	hs|6q13	NM_018368	chr6:70385838-70385779	NM_018368	Hs.271643
A_24_P33895	4.62227	2.2086	4.62227	up	ATF3	activating transcription factor 3	FALSE	Homo sapiens activating transcription factor 3 (ATF3), transcript variant 4, mRNA [NM_001040619]	467	GO:0005515|GO:0008284|GO:0000977|GO:0003700|GO:0003714|GO:0005730|GO:0006094|GO:0005634|GO:0000122|GO:0035914|GO:0000978|GO:0001228|GO:0006351|GO:0042802|GO:0030968|GO:0001078|GO:0045944|GO:0005654|GO:0006987|GO:0044267	212792896	chr1	212792837	+	hs|1q32.3	NM_001040619	chr1:212792837-212792896	NM_001040619	Hs.460
A_23_P77776	2.25047	1.17023	2.25047	up	SRSF2	serine/arginine-rich splicing factor 2	FALSE	Homo sapiens serine/arginine-rich splicing factor 2 (SRSF2), transcript variant 1, mRNA [NM_003016]	6427	GO:0005515|GO:0006397|GO:0008380|GO:0010467|GO:0006369|GO:0006366|GO:0003714|GO:0031124|GO:0005634|GO:0005737|GO:0006406|GO:0016607|GO:0000166|GO:0000398|GO:0016605|GO:0005654|GO:0005681|GO:0070062	74730660	chr17	74730601	-	hs|17q25.1	NM_003016	chr17:74730660-74730601	NM_003016	Hs.584801
A_23_P50942	2.01374	1.00988	2.01374	up	RAB3GAP1	RAB3 GTPase activating protein subunit 1 (catalytic)	FALSE	Homo sapiens RAB3 GTPase activating protein subunit 1 (catalytic) (RAB3GAP1), transcript variant 2, mRNA [NM_012233]	22930	GO:0017112|GO:0017137|GO:0071782|GO:0060079|GO:0032851|GO:0021854|GO:0034389|GO:0043087|GO:0043234|GO:0005737|GO:0097051|GO:0060325|GO:0007420|GO:0033126|GO:0043010|GO:0048172|GO:0005097|GO:0070062	135926758	chr2	135926699	+	hs|2q21.3	NM_012233	chr2:135926699-135926758	NM_012233	Hs.306327
A_32_P190769	3.74501	1.90497	3.74501	up	C1QTNF7	C1q and tumor necrosis factor related protein 7	FALSE	Homo sapiens C1q and tumor necrosis factor related protein 7 (C1QTNF7), transcript variant 3, mRNA [NM_031911]	114905	GO:0005581|GO:0051260|GO:0005615	15446785	chr4	15446726	+	hs|4p15.32	NM_031911	chr4:15446726-15446785	NM_031911	Hs.153714
A_23_P89431	3.4099	1.76973	3.4099	up	CCL2	chemokine (C-C motif) ligand 2	FALSE	Homo sapiens chemokine (C-C motif) ligand 2 (CCL2), mRNA [NM_002982]	6347	GO:0009408|GO:0035684|GO:0008360|GO:0019221|GO:0045202|GO:0005615|GO:0030968|GO:0043524|GO:0006935|GO:0000165|GO:0044299|GO:0031727|GO:0009887|GO:0007179|GO:0031663|GO:0010332|GO:0046677|GO:0005791|GO:0008009|GO:0032869|GO:0036006|GO:0032760|GO:0002523|GO:0007568|GO:0030593|GO:0033552|GO:0032967|GO:0007186|GO:0007187|GO:0043491|GO:0032570|GO:0010759|GO:0006987|GO:0044267|GO:0045471|GO:0031100|GO:…	32584109	chr17	32584050	+	hs|17q12	NM_002982	chr17:32584050-32584109	NM_002982	Hs.303649
A_23_P29922	2.81869	1.49502	2.81869	up	TLR3	toll-like receptor 3	FALSE	Homo sapiens toll-like receptor 3 (TLR3), mRNA [NM_003265]	7098	GO:0005515|GO:0032755|GO:0034123|GO:0046330|GO:0007249|GO:0005765|GO:0032757|GO:0042802|GO:0002756|GO:0051607|GO:0045078|GO:0009597|GO:0042742|GO:0032728|GO:0009986|GO:0032760|GO:0032722|GO:0002224|GO:0045359|GO:0071346|GO:0005887|GO:0045087|GO:0045356|GO:0005789|GO:0035666|GO:0010008|GO:0004888|GO:0045080|GO:0003725|GO:0042346|GO:0034142|GO:0035458|GO:0032735|GO:0005737|GO:0051092|GO:0006954|GO:…	187005949	chr4	187005890	+	hs|4q35.1	NM_003265	chr4:187005890-187005949	NM_003265	Hs.657724
A_23_P50907	2.20099	1.13815	2.20099	up	ITGAV	integrin, alpha V	FALSE	Homo sapiens integrin, alpha V (ITGAV), transcript variant 1, mRNA [NM_002210]	3685	GO:0005515|GO:0002474|GO:0031527|GO:0031528|GO:0034686|GO:0050900|GO:0002020|GO:0035987|GO:0007411|GO:0001618|GO:0030198|GO:0005080|GO:0034446|GO:0034113|GO:0070371|GO:0033690|GO:0070062|GO:0008305|GO:0030335|GO:0010745|GO:0009986|GO:0031589|GO:0050840|GO:0043277|GO:0001846|GO:2000425|GO:0050748|GO:0038027|GO:0045785|GO:0007229|GO:0005887|GO:0034684|GO:0034683|GO:0070588|GO:0032369|GO:0016049|GO:…	187545354	chr2	187545295	+	hs|2q32.1	NM_002210	chr2:187545295-187545354	NM_002210	Hs.436873
A_33_P3285824	2.10058	1.07079	2.10058	up	C4orf3	chromosome 4 open reading frame 3	FALSE	Homo sapiens chromosome 4 open reading frame 3 (C4orf3), transcript variant 1, mRNA [NM_001170330]	401152	GO:0016021	120221550	chr4	120221491	-	hs|4q26	NM_001170330	chr4:120221550-120221491	NM_001170330	Hs.173705
A_24_P304987	2.61875	1.38888	2.61875	up	SAP30BP	SAP30 binding protein	FALSE	Homo sapiens SAP30 binding protein (SAP30BP), transcript variant 2, mRNA [NM_013260]	29115	GO:0005515|GO:0010467|GO:0006355|GO:0045814|GO:0040029|GO:0006915|GO:0005654|GO:0005634|GO:0045111|GO:0010942|GO:0006351	73703729	chr17	73703670	+	hs|17q25.1	NM_013260	chr17:73703670-73703729	NM_013260	Hs.655088
A_23_P114414	4.3743	2.12905	4.3743	up	LONRF3	LON peptidase N-terminal domain and ring finger 3	FALSE	Homo sapiens LON peptidase N-terminal domain and ring finger 3 (LONRF3), transcript variant 1, mRNA [NM_001031855]	79836	GO:0005515|GO:0004176|GO:0006508|GO:0008270	118151739	chrX	118151680	+	hs|Xq24	NM_001031855	chrX:118151680-118151739	NM_001031855	Hs.144266
A_23_P134744	3.83211	1.93814	3.83211	up	RNF122	ring finger protein 122	FALSE	Homo sapiens ring finger protein 122 (RNF122), mRNA [NM_024787]	79845	GO:0005794|GO:0005783|GO:0008270|GO:0016021	33405363	chr8	33405304	-	hs|8p12	NM_024787	chr8:33405363-33405304	NM_024787	Hs.151237
A_33_P3287815	2.67525	1.41967	2.67525	up	DDX21	DEAD (Asp-Glu-Ala-Asp) box helicase 21	FALSE	Homo sapiens DEAD (Asp-Glu-Ala-Asp) box helicase 21 (DDX21), transcript variant 2, mRNA [NM_001256910]	9188	GO:0004004|GO:0003725|GO:0016020|GO:0008152|GO:0005730|GO:0005634|GO:0009615|GO:0043330|GO:0005524|GO:0001649	70744245	chr10	70744186	+	hs|10q22.1	NM_001256910	chr10:70744186-70744245	NM_001256910	Hs.223141
A_24_P336853	2.10355	1.07282	2.10355	up	PNO1	partner of NOB1 homolog (S. cerevisiae)	FALSE	Homo sapiens partner of NOB1 homolog (S. cerevisiae) (PNO1), mRNA [NM_020143]	56902	GO:0005730|GO:0005634	68402394	chr2	68402335	+	hs|2p14	NM_020143	chr2:68402335-68402394	NM_020143	Hs.262858
A_33_P3417810	2.08782	1.062	2.08782	up	NOL10	nucleolar protein 10	FALSE	Homo sapiens nucleolar protein 10 (NOL10), transcript variant 1, mRNA [NM_024894]	79954	GO:0005730	10711841	chr2	10711782	-	hs|2p25.1	NM_024894	chr2:10711841-10711782	NM_024894	Hs.222494
A_33_P3703637	8.91879	3.15685	8.91879	up	lnc-ZNF717-1	lnc-ZNF717-1:1	FALSE	Homo sapiens cDNA FLJ38336 fis, clone FCBBF3026678. [AK095655]			75716759	chr3	75716700	-	hs|3p12.3		chr3:75716759-75716700		Hs.638436
A_23_P256735	2.22281	1.15238	2.22281	up	CPQ	carboxypeptidase Q	FALSE	Homo sapiens carboxypeptidase Q (CPQ), mRNA [NM_016134]	10404	GO:0005794|GO:0005783|GO:0042246|GO:0005615|GO:0005764|GO:0042803|GO:0046872|GO:0005737|GO:0070573|GO:0004180|GO:0006508|GO:0006590|GO:0043171|GO:0070062	98155409	chr8	98155350	+	hs|8q22.1	NM_016134	chr8:98155350-98155409	NM_016134	Hs.156178
A_23_P114155	2.01961	1.01408	2.01961	up	GPKOW	G patch domain and KOW motifs	FALSE	Homo sapiens G patch domain and KOW motifs (GPKOW), mRNA [NM_015698]	27238	GO:0005515|GO:0008150|GO:0003674|GO:0005654|GO:0003676	48970514	chrX	48970455	-	hs|Xp11.23	NM_015698	chrX:48970514-48970455	NM_015698	Hs.503666
A_23_P69310	5.0092	2.32458	5.0092	up	CCRL2	chemokine (C-C motif) receptor-like 2	FALSE	Homo sapiens chemokine (C-C motif) receptor-like 2 (CCRL2), transcript variant 1, mRNA [NM_003965]	9034	GO:0070098|GO:0006954|GO:0007186|GO:0006935|GO:0005886|GO:0005887|GO:0048020|GO:0004950|GO:0042379	46450781	chr3	46450722	+	hs|3p21.31	NM_003965	chr3:46450722-46450781	NM_003965	Hs.535713
A_33_P3511265	10.5374	3.39745	10.5374	up	POSTN	periostin, osteoblast specific factor	FALSE	Homo sapiens periostin, osteoblast specific factor (POSTN), transcript variant 1, mRNA [NM_006475]	10631	GO:0031012|GO:0005802|GO:0005515|GO:0001501|GO:0030198|GO:0009888|GO:0005578|GO:0007155|GO:0050839|GO:0008201|GO:0005615|GO:0008593	38137425	chr13	38137366	-	hs|13q13.3	NM_006475	chr13:38137425-38137366	NM_006475	Hs.136348
A_23_P152782	2.07994	1.05654	2.07994	up	IFI35	interferon-induced protein 35	FALSE	Homo sapiens interferon-induced protein 35 (IFI35), mRNA [NM_005533]	3430	GO:0005515|GO:0060337|GO:0019221|GO:0005634|GO:0005829	41165181	chr17	41165122	+	hs|17q21.31	NM_005533	chr17:41165122-41165181	NM_005533	Hs.632258
A_23_P103201	2.59786	1.37733	2.59786	up	PNRC2	proline-rich nuclear receptor coactivator 2	FALSE	Homo sapiens proline-rich nuclear receptor coactivator 2 (PNRC2), mRNA [NM_017761]	55629	GO:0031087|GO:0005515|GO:0006355|GO:0000184|GO:0000932|GO:0005634|GO:0006351	24289349	chr1	24289291	+	hs|1p36.11	NM_017761	chr1:24289291-24289349	NM_017761	Hs.512636
A_23_P41075	2.02395	1.01717	2.02395	up	MON1A	MON1 secretory trafficking family member A	FALSE	Homo sapiens MON1 secretory trafficking family member A (MON1A), transcript variant 1, mRNA [NM_032355]	84315		49946475	chr3	49946416	-	hs|3p21.31	NM_032355	chr3:49946475-49946416	NM_032355	Hs.655014
A_23_P251937	2.29603	1.19914	2.29603	up	CPEB4	cytoplasmic polyadenylation element binding protein 4	FALSE	Homo sapiens cytoplasmic polyadenylation element binding protein 4 (CPEB4), mRNA [NM_030627]	80315	GO:0005515|GO:0043524|GO:0035235|GO:0005737|GO:0071230|GO:0000166|GO:0005783|GO:0002931|GO:0014069|GO:0005634|GO:0042149|GO:0030425	173387050	chr5	173386991	+	hs|5q35.2	NM_030627	chr5:173386991-173387050	NM_030627	Hs.127126
A_24_P295543	2.1053	1.07402	2.1053	up	BLOC1S2	biogenesis of lysosomal organelles complex-1, subunit 2	FALSE	Homo sapiens biogenesis of lysosomal organelles complex-1, subunit 2 (BLOC1S2), transcript variant 2, mRNA [NM_001001342]	282991	GO:0005515|GO:0008625|GO:0048490|GO:0005813|GO:0008284|GO:0043015|GO:0032438|GO:0005634|GO:0008022|GO:0031175|GO:0005739|GO:0031083|GO:0045944|GO:0007020|GO:0000930|GO:0060155|GO:0008089|GO:0055037|GO:0045893	102034598	chr10	102034539	-	hs|10q24.31	NM_001001342	chr10:102034598-102034539	NM_001001342	Hs.34906
A_22_P00012319	2.23668	1.16136	2.23668	up			FALSE	Homo sapiens cDNA FLJ11161 fis, clone PLACE1007021. [AK002023]			77437681	chr18	77437622	-	hs|18q23		chr18:77437681-77437622		Hs.368518
A_24_P160104	3.32606	1.73381	3.32606	up	TUBA8	tubulin, alpha 8	FALSE	Homo sapiens tubulin, alpha 8 (TUBA8), transcript variant 1, mRNA [NM_018943]	51807	GO:0006184|GO:0051258|GO:0005737|GO:0005874|GO:0005200|GO:0003924|GO:0007017|GO:0005525	18613879	chr22	18613820	+	hs|22q11.21	NM_018943	chr22:18613820-18613879	NM_018943	Hs.137400
A_23_P112061	2.88606	1.5291	2.88606	up	HGSNAT	heparan-alpha-glucosaminide N-acetyltransferase	FALSE	Homo sapiens heparan-alpha-glucosaminide N-acetyltransferase (HGSNAT), mRNA [NM_152419]	138050	GO:0015019|GO:0016746|GO:0005975|GO:0009405|GO:0006027|GO:0007041|GO:0044281|GO:0016021|GO:0005765|GO:0051259|GO:0030203	43056956	chr8	43056897	+	hs|8p11.21	NM_152419	chr8:43056897-43056956	NM_152419	Hs.600384
A_23_P78835	2.21995	1.15053	2.21995	up	ZNF787	zinc finger protein 787	FALSE	Homo sapiens zinc finger protein 787 (ZNF787), mRNA [NM_001002836]	126208	GO:0006355|GO:0005634|GO:0003677|GO:0046872|GO:0006351	56598993	chr19	56598934	-	hs|19q13.43	NM_001002836	chr19:56598993-56598934	NM_001002836	Hs.397153
A_23_P22682	3.13785	1.64978	3.13785	up	ARMCX1	armadillo repeat containing, X-linked 1	FALSE	Homo sapiens armadillo repeat containing, X-linked 1 (ARMCX1), mRNA [NM_016608]	51309	GO:0016021	100809475	chrX	100809416	+	hs|Xq22.1	NM_016608	chrX:100809416-100809475	NM_016608	Hs.9728
A_23_P148959	2.12554	1.08783	2.12554	up	TM2D1	TM2 domain containing 1	FALSE	Homo sapiens TM2 domain containing 1 (TM2D1), mRNA [NM_032027]	83941	GO:0001540|GO:0007186|GO:0005887|GO:0004930|GO:0005654|GO:0097190	62146823	chr1	62146764	-	hs|1p31.3	NM_032027	chr1:62146823-62146764	NM_032027	Hs.656790
A_23_P305507	2.75334	1.46118	2.75334	up	TOP1	topoisomerase (DNA) I	FALSE	Homo sapiens topoisomerase (DNA) I (TOP1), mRNA [NM_003286]	7150	GO:0005515|GO:0003917|GO:0003918|GO:0042493|GO:0005730|GO:0005634|GO:0012501|GO:0000228|GO:0003677|GO:0032922|GO:0006260|GO:0016310|GO:0007059|GO:0040016|GO:0000932|GO:0003682|GO:0043204|GO:0016032|GO:0007623|GO:0006338|GO:0005654|GO:0031298|GO:0001046|GO:0006265	39752264	chr20	39752205	+	hs|20q12	NM_003286	chr20:39752205-39752264	NM_003286	Hs.472737
A_23_P24960	2.11951	1.08373	2.11951	up	NARS2	asparaginyl-tRNA synthetase 2, mitochondrial (putative)	FALSE	Homo sapiens asparaginyl-tRNA synthetase 2, mitochondrial (putative) (NARS2), transcript variant 1, mRNA [NM_024678]	79731	GO:0005739|GO:0010467|GO:0006421|GO:0005759|GO:0004816|GO:0003676|GO:0005524|GO:0006418	78154745	chr11	78152143	-	hs|11q14.1	NM_024678	chr11:78154745-78152143	NM_024678	Hs.503389
A_23_P311895	2.95041	1.56091	2.95041	up	CLIC5	chloride intracellular channel 5	FALSE	Homo sapiens chloride intracellular channel 5 (CLIC5), transcript variant 2, mRNA [NM_016929]	53405	GO:0005515|GO:0006821|GO:0007565|GO:0005244|GO:0005794|GO:0005815|GO:0007605|GO:0060088|GO:0034707|GO:0002024|GO:0032420|GO:0015629|GO:0005254|GO:0008104|GO:0050885|GO:0006810|GO:0034765|GO:0005938|GO:0070062	45866699	chr6	45866640	-	hs|6p21.1	NM_016929	chr6:45866699-45866640	NM_016929	Hs.485489
A_23_P259012	2.65639	1.40947	2.65639	up	BAP1	BRCA1 associated protein-1 (ubiquitin carboxy-terminal hydrolase)	FALSE	Homo sapiens BRCA1 associated protein-1 (ubiquitin carboxy-terminal hydrolase) (BAP1), mRNA [NM_004656]	8314	GO:0071108|GO:0005515|GO:0006511|GO:0016579|GO:0004843|GO:0008285|GO:0005634|GO:0001558|GO:0035517|GO:0005737|GO:0035522|GO:0003682|GO:0035520|GO:0051726|GO:0005654|GO:0008233|GO:0006464	52435946	chr3	52435887	-	hs|3p21.1	NM_004656	chr3:52435946-52435887	NM_004656	Hs.106674
A_32_P196854	2.02996	1.02145	2.02996	up	FAM76A	family with sequence similarity 76, member A	FALSE	Homo sapiens family with sequence similarity 76, member A (FAM76A), transcript variant 1, mRNA [NM_001143912]	199870		28089142	chr1	28089083	+	hs|1p35.3	NM_001143912	chr1:28089083-28089142	NM_001143912	Hs.469359
A_23_P153390	2.11859	1.08311	2.11859	up	CLEC4G	C-type lectin domain family 4, member G	FALSE	Homo sapiens C-type lectin domain family 4, member G (CLEC4G), transcript variant 1, mRNA [NM_198492]	339390	GO:0005515|GO:0030246|GO:0016021	7793963	chr19	7793904	-	hs|19p13.2	NM_198492	chr19:7793963-7793904	NM_198492	Hs.220649
A_23_P133582	3.1674	1.6633	3.1674	up	ETF1	eukaryotic translation termination factor 1	FALSE	Homo sapiens eukaryotic translation termination factor 1 (ETF1), transcript variant 1, mRNA [NM_004730]	2107	GO:0005515|GO:0010467|GO:0003723|GO:0006449|GO:0006415|GO:0003747|GO:0006412|GO:0005829|GO:0005737|GO:0000184|GO:0016149|GO:0006479|GO:0043022|GO:0008079|GO:0044267	137842459	chr5	137842400	-	hs|5q31.2	NM_004730	chr5:137842459-137842400	NM_004730	Hs.483494
A_24_P317835	2.02933	1.021	2.02933	up	INPP5E	inositol polyphosphate-5-phosphatase, 72 kDa	FALSE	Homo sapiens inositol polyphosphate-5-phosphatase, 72 kDa (INPP5E), mRNA [NM_019892]	56623	GO:0006996|GO:0005886|GO:0006661|GO:0005930|GO:0072372|GO:0004445|GO:0044281|GO:0001726|GO:0005829|GO:0004439|GO:0008150|GO:0046855|GO:0032580|GO:0046856|GO:0005856|GO:0006644	139323209	chr9	139323150	-	hs|9q34.3	NM_019892	chr9:139323209-139323150	NM_019892	Hs.120998
A_24_P184445	3.3192	1.73084	3.3192	up	MMP19	matrix metallopeptidase 19	FALSE	Homo sapiens matrix metallopeptidase 19 (MMP19), transcript variant 1, mRNA [NM_002429]	4327	GO:0005509|GO:0005578|GO:0001554|GO:0001542|GO:0005576|GO:0001525|GO:0051591|GO:0030154|GO:0001541|GO:0022617|GO:0030198|GO:0030574|GO:0006508|GO:0008270|GO:0009725|GO:0004222	56229481	chr12	56229422	-	hs|12q13.2	NM_002429	chr12:56229481-56229422	NM_002429	Hs.591033
A_33_P3242603	2.05138	1.0366	2.05138	up	ASH1L-AS1	ASH1L antisense RNA 1	FALSE	Homo sapiens ASH1L antisense RNA 1 (ASH1L-AS1), long non-coding RNA [NR_027023]	645676		155533413	chr1	155533351	+	hs|1q22	NR_027023	chr1:155533351-155533413	NR_027023	Hs.745405
A_21_P0014188	3.31445	1.72877	3.31445	up	LOC401317	uncharacterized LOC401317	FALSE	Homo sapiens cDNA clone IMAGE:30398108. [BC087859]	401317		28450196	chr7	28450137	+	hs|7p15.1	BC087859	chr7:28450137-28450196		Hs.729524
A_23_P8702	231.838	7.85697	231.838	up	PIP	prolactin-induced protein	FALSE	Homo sapiens prolactin-induced protein (PIP), mRNA [NM_002652]	5304	GO:0005515|GO:0070233|GO:0002682|GO:0003779|GO:0005634|GO:0005615|GO:0010628|GO:0016324|GO:0001948|GO:0001895|GO:0019864|GO:0046983|GO:0006508|GO:0004190|GO:0001580|GO:0070062	142836804	chr7	142836745	+	hs|7q34	NM_002652	chr7:142836745-142836804	NM_002652	Hs.99949
A_23_P28169	2.00428	1.00308	2.00428	up	ARL6IP6	ADP-ribosylation factor-like 6 interacting protein 6	FALSE	Homo sapiens ADP-ribosylation factor-like 6 interacting protein 6 (ARL6IP6), transcript variant 1, mRNA [NM_152522]	151188	GO:0016021	153616847	chr2	153616788	+	hs|2q23.3	NM_152522	chr2:153616788-153616847	NM_152522	Hs.744874
A_33_P3326483	2.34062	1.22689	2.34062	up	CRABP1	cellular retinoic acid binding protein 1	FALSE	Homo sapiens cellular retinoic acid binding protein 1 (CRABP1), mRNA [NM_004378]	1381	GO:0005515|GO:0007165|GO:0005215|GO:0001972|GO:0016918|GO:0006810|GO:0005501|GO:0007275|GO:0019841|GO:0005829	78640567	chr15	78640508	+	hs|15q25.1	NM_004378	chr15:78640508-78640567	NM_004378	Hs.346950
A_23_P129246	2.48699	1.3144	2.48699	up	PLEKHO2	pleckstrin homology domain containing, family O member 2	FALSE	Homo sapiens pleckstrin homology domain containing, family O member 2 (PLEKHO2), transcript variant 1, mRNA [NM_025201]	80301		65160015	chr15	65159956	+	hs|15q22.31	NM_025201	chr15:65159956-65160015	NM_025201	Hs.709337
A_33_P3431595	3.36636	1.75119	3.36636	up	C8orf31	chromosome 8 open reading frame 31	FALSE	Homo sapiens chromosome 8 open reading frame 31 (C8orf31), transcript variant 1, mRNA [NM_173687]	286122		144134860	chr8	144134801	+	hs|8q24.3	NM_173687	chr8:144134801-144134860	NM_173687	Hs.660382
A_24_P296070	2.49919	1.32146	2.49919	up	COG3	component of oligomeric golgi complex 3	FALSE	Homo sapiens component of oligomeric golgi complex 3 (COG3), mRNA [NM_031431]	83548	GO:0005515|GO:0005801|GO:0005794|GO:0033365|GO:0005886|GO:0006890|GO:0050821|GO:0006891|GO:0006886|GO:0006888|GO:0005737|GO:0032580|GO:0008565|GO:0007030|GO:0017119|GO:0005654|GO:0006486|GO:0000301	46110238	chr13	46110179	+	hs|13q14.13	NM_031431	chr13:46110179-46110238	NM_031431	Hs.507948
A_23_P24004	3.15708	1.65859	3.15708	up	IFIT2	interferon-induced protein with tetratricopeptide repeats 2	FALSE	Homo sapiens interferon-induced protein with tetratricopeptide repeats 2 (IFIT2), mRNA [NM_001547]	3433	GO:0032091|GO:0005515|GO:0051607|GO:0005737|GO:0060337|GO:0043065|GO:0008637|GO:0035457|GO:0005783|GO:0019221|GO:0009615|GO:0005829	91068456	chr10	91068397	+	hs|10q23.31	NM_001547	chr10:91068397-91068456	NM_001547	Hs.437609
A_23_P143845	2.27133	1.18354	2.27133	up	TIPARP	TCDD-inducible poly(ADP-ribose) polymerase	FALSE	Homo sapiens TCDD-inducible poly(ADP-ribose) polymerase (TIPARP), transcript variant 2, mRNA [NM_015508]	25976	GO:0030097|GO:0006807|GO:0045732|GO:0001822|GO:0008209|GO:0048705|GO:0005634|GO:0009791|GO:0046872|GO:0035326|GO:0003950|GO:0006471|GO:0008210|GO:0008585|GO:0071407|GO:0060325|GO:0048745|GO:0010629|GO:0060021|GO:0044236|GO:0048008|GO:0001570	156424369	chr3	156424310	+	hs|3q25.31	NM_015508	chr3:156424310-156424369	NM_015508	Hs.744050
A_24_P354689	2.70314	1.43463	2.70314	up	SPOCK1	sparc/osteonectin, cwcv and kazal-like domains proteoglycan (testican) 1	FALSE	Homo sapiens sparc/osteonectin, cwcv and kazal-like domains proteoglycan (testican) 1 (SPOCK1), mRNA [NM_004598]	6695	GO:0031594|GO:0004869|GO:0004867|GO:0005509|GO:0005578|GO:0010812|GO:0021953|GO:0014069|GO:0001558|GO:0005615|GO:0007399|GO:0010951|GO:0007165|GO:0016528|GO:0005737|GO:0033268|GO:0008191|GO:0010977|GO:0001764|GO:0007155|GO:0022008	136311246	chr5	136311187	-	hs|5q31.2	NM_004598	chr5:136311246-136311187	NM_004598	Hs.596136
A_23_P501805	2.14841	1.10327	2.14841	up	LIPT1	lipoyltransferase 1	FALSE	Homo sapiens lipoyltransferase 1 (LIPT1), transcript variant 3, mRNA [NM_145197]	51601	GO:0006629|GO:0005739|GO:0016746|GO:0009249|GO:0006464	99779187	chr2	99779128	+	hs|2q11.2	NM_145197	chr2:99779128-99779187	NM_145197	Hs.719172
A_24_P563545	2.05944	1.04225	2.05944	up	SLC30A7	solute carrier family 30 (zinc transporter), member 7	FALSE	Homo sapiens solute carrier family 30 (zinc transporter), member 7 (SLC30A7), transcript variant 1, mRNA [NM_133496]	148867	GO:0048471|GO:0005737|GO:0005794|GO:0032119|GO:0008324|GO:0016023|GO:0006829|GO:0016021|GO:0055085|GO:0044267|GO:0031982|GO:0070062	101444524	chr1	101444465	+	hs|1p21.2	NM_133496	chr1:101444465-101444524	NM_133496	Hs.533903
A_23_P341223	3.95016	1.98191	3.95016	up	KLHL21	kelch-like family member 21	FALSE	Homo sapiens kelch-like family member 21 (KLHL21), mRNA [NM_014851]	9903	GO:0005827|GO:0007067|GO:0005813|GO:0005737|GO:0004842|GO:0032465|GO:0016567|GO:0035853|GO:0031463|GO:0051301	6650895	chr1	6650836	-	hs|1p36.31	NM_014851	chr1:6650895-6650836	NM_014851	Hs.7764
A_23_P39718	2.0188	1.0135	2.0188	up	FEZ2	fasciculation and elongation protein zeta 2 (zygin II)	FALSE	Homo sapiens fasciculation and elongation protein zeta 2 (zygin II) (FEZ2), transcript variant 2, mRNA [NM_001042548]	9637	GO:0005515|GO:0007165|GO:0007411|GO:0007399	36779763	chr2	36779704	-	hs|2p22.2	NM_001042548	chr2:36779763-36779704	NM_001042548	Hs.258563
A_23_P75800	2.57768	1.36607	2.57768	up	RAB3IL1	RAB3A interacting protein (rabin3)-like 1	FALSE	Homo sapiens RAB3A interacting protein (rabin3)-like 1 (RAB3IL1), transcript variant 1, mRNA [NM_013401]	5866	GO:0005515|GO:0017112|GO:0032851|GO:0015031	61665038	chr11	61664979	-	hs|11q12.2	NM_013401	chr11:61665038-61664979	NM_013401	Hs.13759
A_23_P328237	3.38622	1.75968	3.38622	up	SPTY2D1	SPT2, Suppressor of Ty, domain containing 1 (S. cerevisiae)	FALSE	Homo sapiens SPT2, Suppressor of Ty, domain containing 1 (S. cerevisiae) (SPTY2D1), mRNA [NM_194285]	144108	GO:0008150|GO:0003674|GO:0005575	18628959	chr11	18628900	-	hs|11p15.1	NM_194285	chr11:18628959-18628900	NM_194285	Hs.745113
A_21_P0004421	2.11048	1.07757	2.11048	up	LUCAT1	lung cancer associated transcript 1 (non-protein coding)	FALSE	Homo sapiens lung cancer associated transcript 1 (non-protein coding) (LUCAT1), transcript variant 1, long non-coding RNA [NR_103548]	100505994		90598902	chr5	90598843	-	hs|5q14.3	NR_103548	chr5:90598902-90598843	NR_103548
A_23_P167789	3.81407	1.93133	3.81407	up	FAM53C	family with sequence similarity 53, member C	FALSE	Homo sapiens family with sequence similarity 53, member C (FAM53C), transcript variant 2, mRNA [NM_016605]	51307		137685057	chr5	137684998	+	hs|5q31.2	NM_016605	chr5:137684998-137685057	NM_016605	Hs.54056
A_24_P272290	3.42202	1.77485	3.42202	up	PXDC1	PX domain containing 1	FALSE	Homo sapiens PX domain containing 1 (PXDC1), mRNA [NM_183373]	221749	GO:0035091	3723444	chr6	3723385	-	hs|6p25.2	NM_183373	chr6:3723444-3723385	NM_183373	Hs.484500
A_23_P148484	4.03138	2.01127	4.03138	up	RLIM	ring finger protein, LIM domain interacting	FALSE	Homo sapiens ring finger protein, LIM domain interacting (RLIM), transcript variant 1, mRNA [NM_016120]	51132	GO:0006511|GO:0004842|GO:0016567|GO:0003714|GO:0016874|GO:0005634|GO:0000122|GO:0060816|GO:0006351|GO:0043433|GO:0005737|GO:0017053|GO:0005654|GO:0008270|GO:0045892	73811184	chrX	73811125	-	hs|Xq13.2	NM_016120	chrX:73811184-73811125	NM_016120	Hs.653288
A_23_P12329	2.44592	1.29038	2.44592	up	APH1A	APH1A gamma secretase subunit	FALSE	Homo sapiens APH1A gamma secretase subunit (APH1A), transcript variant 2, mRNA [NM_016022]	51107	GO:0042987|GO:0001656|GO:0005515|GO:0048011|GO:0043065|GO:0005794|GO:0007220|GO:0048013|GO:0005886|GO:0031293|GO:0005783|GO:0043085|GO:0097190|GO:0004175|GO:0007219|GO:0016020|GO:0016485|GO:0005887|GO:0007411|GO:0032580|GO:0005789|GO:0006509	150238325	chr1	150238266	-	hs|1q21.2	NM_016022	chr1:150238325-150238266	NM_016022	Hs.108408
A_19_P00806158	2.068	1.04824	2.068	up			FALSE				62517888	chrX	62517829	-	hs|Xq11.1		chrX:062517888-062517829
A_24_P288424	2.23995	1.16346	2.23995	up	SLMO2	slowmo homolog 2 (Drosophila)	FALSE	Homo sapiens slowmo homolog 2 (Drosophila) (SLMO2), transcript variant 1, mRNA [NM_016045]	51012	GO:0005758|GO:0015914	57608816	chr20	57608757	-	hs|20q13.32	NM_016045	chr20:57608816-57608757	NM_016045	Hs.656865
A_23_P102842	2.08813	1.06221	2.08813	up	NFS1	NFS1 cysteine desulfurase	FALSE	Homo sapiens NFS1 cysteine desulfurase (NFS1), transcript variant 1, mRNA [NM_021100]	9054	GO:0005515|GO:0006534|GO:0005730|GO:0006767|GO:0005634|GO:0044281|GO:0042803|GO:0043231|GO:0005829|GO:0032324|GO:0005739|GO:0005737|GO:0000096|GO:0006461|GO:0006766|GO:0005759|GO:0031071|GO:0030170|GO:0006777|GO:0005654|GO:0018283	34257106	chr20	34257047	-	hs|20q11.22	NM_021100	chr20:34257106-34257047	NM_021100	Hs.194692
A_23_P157361	5.02779	2.32992	5.02779	up	WDR60	WD repeat domain 60	FALSE	Homo sapiens WD repeat domain 60 (WDR60), mRNA [NM_018051]	55112	GO:0006996|GO:0030030|GO:0072372|GO:0005615|GO:0070062	158738553	chr7	158738494	+	hs|7q36.3	NM_018051	chr7:158738494-158738553	NM_018051	Hs.389945
A_24_P356916	2.18258	1.12603	2.18258	up	SLC13A3	solute carrier family 13 (sodium-dependent dicarboxylate transporter), member 3	FALSE	Homo sapiens solute carrier family 13 (sodium-dependent dicarboxylate transporter), member 3 (SLC13A3), transcript variant 2, mRNA [NM_001011554]	64849	GO:0005886|GO:0006835|GO:0016021|GO:0006814|GO:0055085|GO:0070062|GO:0015362	45187191	chr20	45187132	-	hs|20q13.12	NM_001011554	chr20:45187191-45187132	NM_001011554	Hs.655498
A_24_P940006	5.28964	2.40317	5.28964	up	EFNB3	ephrin-B3	FALSE	Homo sapiens ephrin-B3 (EFNB3), mRNA [NM_001406]	1949	GO:0005005|GO:0048013|GO:0046875|GO:0005886|GO:0007411|GO:0005887|GO:0016198|GO:0007628|GO:0007267|GO:0016032|GO:0007399	7614182	chr17	7614123	+	hs|17p13.1	NM_001406	chr17:7614123-7614182	NM_001406	Hs.26988
A_23_P149626	2.21422	1.1468	2.21422	up	PLEKHG5	pleckstrin homology domain containing, family G (with RhoGef domain) member 5	FALSE	Homo sapiens pleckstrin homology domain containing, family G (with RhoGef domain) member 5 (PLEKHG5), transcript variant 2, mRNA [NM_198681]	57449	GO:0051056|GO:0048471|GO:0048011|GO:0035767|GO:0043065|GO:0005886|GO:0007264|GO:0030139|GO:0097190|GO:0030027|GO:0005829|GO:0005737|GO:0005911|GO:0032321|GO:0004871|GO:0005089|GO:0043123	6527281	chr1	6527222	-	hs|1p36.31	NM_198681	chr1:6527281-6527222	NM_198681	Hs.284232
A_23_P139123	2.79444	1.48256	2.79444	up	SERPING1	serpin peptidase inhibitor, clade G (C1 inhibitor), member 1	FALSE	Homo sapiens serpin peptidase inhibitor, clade G (C1 inhibitor), member 1 (SERPING1), transcript variant 1, mRNA [NM_000062]	710	GO:0005515|GO:0001869|GO:0004867|GO:0008015|GO:0007568|GO:0030168|GO:0072562|GO:0005576|GO:0005615|GO:0010951|GO:0007596|GO:0045087|GO:0007597|GO:0002576|GO:0006958|GO:0031093|GO:0042730|GO:0070062	57373950	chr11	57373891	+	hs|11q12.1	NM_000062	chr11:57373891-57373950	NM_000062	Hs.384598
A_21_P0000622	2.31787	1.2128	2.31787	up	WDR86-AS1	WDR86 antisense RNA 1	FALSE	Homo sapiens WDR86 antisense RNA 1 (WDR86-AS1), transcript variant 1, long non-coding RNA [NR_034012]	100131176		151109981	chr7	151109922	+	hs|7q36.1	NR_034012	chr7:151109922-151109981	NR_034012	Hs.659231
A_32_P203300	2.01172	1.00843	2.01172	up	EIF4E	eukaryotic translation initiation factor 4E	FALSE	Homo sapiens eukaryotic translation initiation factor 4E (EIF4E), transcript variant 2, mRNA [NM_001130679]	1977	GO:0005515|GO:0000339|GO:0008286|GO:0010467|GO:0016281|GO:0010494|GO:0030324|GO:0019221|GO:0003743|GO:0006412|GO:0006413|GO:0005829|GO:0016442|GO:0005737|GO:0000082|GO:0006406|GO:0000932|GO:0016032|GO:0000289|GO:0070062|GO:0000288|GO:0031370|GO:0006417|GO:0033391|GO:0045931|GO:0044267|GO:0005845	99800634	chr4	99800575	-	hs|4q23	NM_001130679	chr4:99800634-99800575	NM_001130679	Hs.249718
A_24_P48057	5.62991	2.49311	5.62991	up	IRX5	iroquois homeobox 5	FALSE	Homo sapiens iroquois homeobox 5 (IRX5), transcript variant 1, mRNA [NM_005853]	10265	GO:0043565|GO:0008406|GO:0006355|GO:0002027|GO:0060040|GO:0042551|GO:0005634|GO:0005499|GO:0048701|GO:0007601|GO:0050896|GO:0006351	54967785	chr16	54967726	+	hs|16q12.2	NM_005853	chr16:54967726-54967785	NM_005853	Hs.435730
A_23_P31143	2.77386	1.4719	2.77386	up	TPD52L1	tumor protein D52-like 1	FALSE	Homo sapiens tumor protein D52-like 1 (TPD52L1), transcript variant 2, mRNA [NM_001003395]	7164	GO:0005515|GO:0048471|GO:0005737|GO:0043281|GO:0046982|GO:0043406|GO:0000086|GO:2001235|GO:0046330|GO:0042803|GO:0042802	125584504	chr6	125584445	+	hs|6q22.31	NM_001003395	chr6:125584445-125584504	NM_001003395	Hs.591347
A_22_P00022412	2.50688	1.32589	2.50688	up	RNF125	ring finger protein 125, E3 ubiquitin protein ligase	FALSE	Homo sapiens ring finger protein 125, E3 ubiquitin protein ligase (RNF125), mRNA [NM_017831]	54941	GO:0004842|GO:0016567|GO:0045087|GO:0016874|GO:0008270|GO:0032480	29622236	chr18	29622177	+	hs|18q12.1	NM_017831	chr18:29622177-29622236	NM_017831	Hs.633703
A_24_P702813	3.2819	1.71453	3.2819	up	XPR1	xenotropic and polytropic retrovirus receptor 1	FALSE	Homo sapiens xenotropic and polytropic retrovirus receptor 1 (XPR1), transcript variant 1, mRNA [NM_004736]	9213	GO:0005794|GO:0007186|GO:0005886|GO:0005887|GO:0004930|GO:0001618|GO:0004872|GO:0009615|GO:0004888	180859278	chr1	180859219	+	hs|1q25.3	NM_004736	chr1:180859219-180859278	NM_004736	Hs.227656
A_22_P00002044	2.14793	1.10295	2.14793	up	SCAMP1	secretory carrier membrane protein 1	FALSE	Homo sapiens secretory carrier membrane protein 1 (SCAMP1), transcript variant 1, mRNA [NM_004866]	9522	GO:0005802|GO:0005515|GO:0042589|GO:0030136|GO:0019904|GO:0006892|GO:0030672|GO:0016021|GO:0015031|GO:0006887|GO:0055038|GO:0006897	77771636	chr5	77771577	+	hs|5q14.1	NM_004866	chr5:77771577-77771636	NM_004866	Hs.482587
A_23_P3312	2.26931	1.18225	2.26931	up	ISLR	immunoglobulin superfamily containing leucine-rich repeat	FALSE	Homo sapiens immunoglobulin superfamily containing leucine-rich repeat (ISLR), transcript variant 1, mRNA [NM_005545]	3671	GO:0007155|GO:0070062	74469180	chr15	74469121	+	hs|15q24.1	NM_005545	chr15:74469121-74469180	NM_005545	Hs.745166
A_23_P119141	2.08369	1.05914	2.08369	up	KEAP1	kelch-like ECH-associated protein 1	FALSE	Homo sapiens kelch-like ECH-associated protein 1 (KEAP1), transcript variant 1, mRNA [NM_203500]	9817	GO:0005515|GO:0016567|GO:0005815|GO:0005783|GO:0032436|GO:0030496|GO:0001701|GO:0043433|GO:0006351|GO:0005829|GO:0005737|GO:0031463|GO:0071353|GO:0005654|GO:0045604|GO:0008134|GO:0010499	10597321	chr19	10597262	-	hs|19p13.2	NM_203500	chr19:10597321-10597262	NM_203500	Hs.465870
A_24_P245108	2.00415	1.00299	2.00415	up	USP7	ubiquitin specific peptidase 7 (herpes virus-associated)	FALSE	Homo sapiens ubiquitin specific peptidase 7 (herpes virus-associated) (USP7), transcript variant 3, mRNA [NM_001286458]	7874	GO:0005515|GO:0016578|GO:0016579|GO:0004843|GO:0032088|GO:0005634|GO:0007275|GO:0008022|GO:0005829|GO:0004197|GO:0051090|GO:0002039|GO:0010216|GO:0061136|GO:0006283|GO:0016605|GO:0016032|GO:0043161|GO:0031625|GO:0008134	8986423	chr16	8986364	-	hs|16p13.2	NM_001286458	chr16:8986423-8986364	NM_001286458	Hs.386939
A_23_P91414	3.75696	1.90957	3.75696	up	CCM2L	cerebral cavernous malformation 2-like	FALSE	Homo sapiens cerebral cavernous malformation 2-like (CCM2L), mRNA [NM_080625]	140706	GO:0032091|GO:0008150|GO:0003674|GO:0042060|GO:0003222|GO:0034111|GO:0005575|GO:0090271|GO:0055017|GO:0003209	30619655	chr20	30619596	+	hs|20q11.21	NM_080625	chr20:30619596-30619655	NM_080625	Hs.382151
A_23_P37910	2.03192	1.02284	2.03192	up	MAPK3	mitogen-activated protein kinase 3	FALSE	Homo sapiens mitogen-activated protein kinase 3 (MAPK3), transcript variant 1, mRNA [NM_002746]	5595	GO:0005515|GO:0010467|GO:0051216|GO:0019221|GO:0006361|GO:0006360|GO:0051403|GO:0034605|GO:0002756|GO:0007173|GO:0000165|GO:0007411|GO:0002755|GO:0009887|GO:0005856|GO:0038083|GO:0031663|GO:0004707|GO:0038124|GO:0005794|GO:0038123|GO:0019902|GO:0034134|GO:0030168|GO:0030509|GO:0002224|GO:0016310|GO:0007049|GO:0051493|GO:0008543|GO:0045087|GO:0035666|GO:0034166|GO:0005654|GO:0001784|GO:0038096|GO:…	30128296	chr16	30128237	-	hs|16p11.2	NM_002746	chr16:30128296-30128237	NM_002746	Hs.861
A_23_P59877	2.3831	1.25284	2.3831	up	FABP5	fatty acid binding protein 5 (psoriasis-associated)	FALSE	Homo sapiens fatty acid binding protein 5 (psoriasis-associated) (FABP5), mRNA [NM_001444]	2171	GO:0005515|GO:0006629|GO:0005215|GO:0005504|GO:0005829|GO:0008289|GO:0005737|GO:0008544|GO:0015758|GO:0006006|GO:0005654|GO:0006656|GO:0070062	82196772	chr8	82196174	+	hs|8q21.13	NM_001444	chr8:82196174-82196772	NM_001444	Hs.408061
A_33_P3262108	2.36425	1.24138	2.36425	up			FALSE				143914513	chr1	143914454	-	hs|1q21.1		chr1:143914513-143914454
A_23_P14769	2.32852	1.21942	2.32852	up	FES	FES proto-oncogene, tyrosine kinase	FALSE	Homo sapiens FES proto-oncogene, tyrosine kinase (FES), transcript variant 1, mRNA [NM_002005]	2242	GO:0005515|GO:0008283|GO:0008360|GO:2000145|GO:2000251|GO:0030155|GO:0005829|GO:0005737|GO:0046777|GO:0045639|GO:0007173|GO:0006935|GO:0007411|GO:0042127|GO:0015630|GO:0060627|GO:0038083|GO:0034987|GO:0043304|GO:0031116|GO:0005794|GO:0007275|GO:0018108|GO:0031410|GO:0005524|GO:0031234|GO:0016477|GO:0045087|GO:0010976|GO:0016023|GO:0045595|GO:0006468|GO:0004713|GO:0035091|GO:0005925|GO:0004715	91436982	chr15	91436923	+	hs|15q26.1	NM_002005	chr15:91436923-91436982	NM_002005	Hs.7636
A_23_P131089	2.42443	1.27765	2.42443	up	KANK3	KN motif and ankyrin repeat domains 3	FALSE	Homo sapiens KN motif and ankyrin repeat domains 3 (KANK3), mRNA [NM_198471]	256949		8387752	chr19	8387693	-	hs|19p13.2	NM_198471	chr19:8387752-8387693	NM_198471	Hs.745036
A_33_P3260722	2.08728	1.06162	2.08728	up	UVRAG	UV radiation resistance associated	FALSE	Homo sapiens UV radiation resistance associated (UVRAG), mRNA [NM_003369]	7405	GO:0005515|GO:0035493|GO:0017124|GO:0005770|GO:0046718|GO:0005764|GO:0045335|GO:0043234|GO:0005737|GO:0006281|GO:0000149|GO:0060627|GO:0005769|GO:0010508	75855259	chr11	75855200	+	hs|11q13.5	NM_003369	chr11:75855200-75855259	NM_003369	Hs.202470
A_23_P116642	2.66187	1.41244	2.66187	up	SLC26A10	solute carrier family 26, member 10	FALSE	Homo sapiens solute carrier family 26, member 10 (SLC26A10), mRNA [NM_133489]	65012	GO:0015297|GO:0008271|GO:0016021	58019450	chr12	58019391	+	hs|12q13.3	NM_133489	chr12:58019391-58019450	NM_133489	Hs.727726
A_23_P18490	2.12745	1.08912	2.12745	up	MAEA	macrophage erythroblast attacher	FALSE	Homo sapiens macrophage erythroblast attacher (MAEA), transcript variant 1, mRNA [NM_001017405]	10296	GO:0005826|GO:0005819|GO:0003779|GO:0005634|GO:0016363|GO:0007346|GO:0005737|GO:0007049|GO:0043249|GO:0048822|GO:0005887|GO:0007010|GO:0005654|GO:0005856|GO:0007155|GO:0033033|GO:0051301	1333176	chr4	1333117	+	hs|4p16.3	NM_001017405	chr4:1333117-1333176	NM_001017405	Hs.139896
A_33_P3360665	2.9219	1.54691	2.9219	up	ACVR1	activin A receptor, type I	FALSE	Homo sapiens activin A receptor, type I (ACVR1), transcript variant 1, mRNA [NM_001105]	90	GO:0005515|GO:0003289|GO:0001655|GO:0001755|GO:0003183|GO:0046332|GO:0007281|GO:0042803|GO:0003143|GO:0004702|GO:0018107|GO:0007179|GO:0009968|GO:0023014|GO:0002526|GO:0001707|GO:0030501|GO:0032926|GO:0030509|GO:0032924|GO:0001701|GO:0001702|GO:0060923|GO:0048641|GO:0060037|GO:0071385|GO:0005887|GO:0048179|GO:0060389|GO:0045893|GO:0051145|GO:0016361|GO:2001237|GO:0007368|GO:0046872|GO:0000082|GO:…	158594035	chr2	158593976	-	hs|2q24.1	NM_001105	chr2:158594035-158593976	NM_001105	Hs.470316
A_33_P3306146	2.1638	1.11357	2.1638	up	PLAU	plasminogen activator, urokinase	FALSE	Homo sapiens plasminogen activator, urokinase (PLAU), transcript variant 2, mRNA [NM_001145031]	5328	GO:0005515|GO:0033628|GO:0001666|GO:0010469|GO:0004252|GO:0005886|GO:0009986|GO:0014910|GO:0014909|GO:0005576|GO:2000097|GO:0005615|GO:0061041|GO:0007165|GO:0006935|GO:0007596|GO:0042127|GO:0006508|GO:0042730|GO:0005925|GO:0070062	75674673	chr10	75674614	+	hs|10q22.2	NM_001145031	chr10:75674614-75674673	NM_001145031	Hs.77274
A_21_P0005215	4.53947	2.18252	4.53947	up	MEOX2-AS1	MEOX2 antisense RNA 1 (head to head)	FALSE	Homo sapiens MEOX2 antisense RNA 1 (head to head) (MEOX2-AS1), long non-coding RNA [NR_110094]	101927524		15734885	chr7	15734826	+	hs|7p21.2	NR_110094	chr7:15734826-15734885	NR_110094
A_32_P205624	2.0565	1.04019	2.0565	up	SHC2	SHC (Src homology 2 domain containing) transforming protein 2	FALSE	Homo sapiens SHC (Src homology 2 domain containing) transforming protein 2 (SHC2), mRNA [NM_012435]	25759	GO:0008286|GO:0005515|GO:0048010|GO:0030971|GO:0000187|GO:0048011|GO:0019901|GO:0005886|GO:0007265|GO:0005575|GO:0007169|GO:0005829	416892	chr19	416833	-	hs|19p13.3	NM_012435	chr19:416892-416833	NM_012435	Hs.30965
A_33_P3337540	2.25471	1.17294	2.25471	up	IFNAR2	interferon (alpha, beta and omega) receptor 2	FALSE	Homo sapiens interferon (alpha, beta and omega) receptor 2 (IFNAR2), transcript variant 2, mRNA [NM_000874]	3455	GO:0005515|GO:0005886|GO:0006357|GO:0019901|GO:0008283|GO:0035455|GO:0019221|GO:0005576|GO:0009615|GO:0005615|GO:0007259|GO:0060337|GO:0060338|GO:0004905|GO:0019962|GO:0005887|GO:0007166	34635061	chr21	34635002	+	hs|21q22.11	NM_000874	chr21:34635002-34635061	NM_000874	Hs.708195
A_24_P139943	2.25736	1.17464	2.25736	up	HS1BP3	HCLS1 binding protein 3	FALSE	Homo sapiens HCLS1 binding protein 3 (HS1BP3), mRNA [NM_022460]	64342	GO:0035091	20817935	chr2	20817876	-	hs|2p24.1	NM_022460	chr2:20817935-20817876	NM_022460	Hs.531785
A_23_P93823	2.01393	1.01002	2.01393	up	RFC2	replication factor C (activator 1) 2, 40kDa	FALSE	Homo sapiens replication factor C (activator 1) 2, 40kDa (RFC2), transcript variant 1, mRNA [NM_181471]	5982	GO:0005515|GO:0005794|GO:0003689|GO:0005634|GO:0005524|GO:0006260|GO:0006261|GO:0006271|GO:0006281|GO:0000723|GO:0006283|GO:0000722|GO:0006297|GO:0005654|GO:0005663|GO:0006289|GO:0000278|GO:0032201	73649925	chr7	73649866	-	hs|7q11.23	NM_181471	chr7:73649925-73649866	NM_181471	Hs.647062
A_23_P53891	3.65169	1.86857	3.65169	up	KLF5	Kruppel-like factor 5 (intestinal)	FALSE	Homo sapiens Kruppel-like factor 5 (intestinal) (KLF5), transcript variant 1, mRNA [NM_001730]	688	GO:0060576|GO:0005515|GO:0008284|GO:0005794|GO:0005886|GO:0006366|GO:0030033|GO:0032534|GO:0000122|GO:0001525|GO:0035914|GO:0000978|GO:0046872|GO:0043231|GO:0071407|GO:0001077|GO:0005737|GO:0045944|GO:0045600|GO:0005654	73651038	chr13	73650979	+	hs|13q22.1	NM_001730	chr13:73650979-73651038	NM_001730	Hs.508234
A_24_P4054	2.16122	1.11184	2.16122	up	TRIP6	thyroid hormone receptor interactor 6	FALSE	Homo sapiens thyroid hormone receptor interactor 6 (TRIP6), mRNA [NM_003302]	7205	GO:0005515|GO:0005149|GO:0006355|GO:0030335|GO:0005886|GO:0005634|GO:0006351|GO:0046966|GO:0045323|GO:0005737|GO:0008588|GO:0048041|GO:0008270|GO:0005856|GO:0019900|GO:0005925	100470366	chr7	100470307	+	hs|7q22.1	NM_003302	chr7:100470307-100470366	NM_003302	Hs.534360
A_23_P64785	2.58642	1.37096	2.58642	up	ZNF641	zinc finger protein 641	FALSE	Homo sapiens zinc finger protein 641 (ZNF641), transcript variant 1, mRNA [NM_152320]	121274	GO:0005737|GO:0006366|GO:0006357|GO:0000981|GO:0005654|GO:0003677|GO:0046872	48736501	chr12	48736442	-	hs|12q13.11	NM_152320	chr12:48736501-48736442	NM_152320	Hs.23492
A_24_P48723	4.61012	2.2048	4.61012	up	PTGIS	prostaglandin I2 (prostacyclin) synthase	FALSE	Homo sapiens prostaglandin I2 (prostacyclin) synthase (PTGIS), mRNA [NM_000961]	5740	GO:0005515|GO:0019369|GO:0006805|GO:0005783|GO:0019674|GO:0006767|GO:0005634|GO:0006769|GO:0044281|GO:0005615|GO:0006690|GO:0004497|GO:0035360|GO:0001516|GO:0045019|GO:0071354|GO:0019371|GO:0005506|GO:0071456|GO:0032088|GO:0097190|GO:0045766|GO:0006766|GO:1900119|GO:0050728|GO:0005901|GO:0008116|GO:0071347|GO:0005789|GO:0016021|GO:0016705|GO:0055114|GO:0020037	48120507	chr20	48120448	-	hs|20q13.13	NM_000961	chr20:48120507-48120448	NM_000961	Hs.302085
A_24_P56052	2.07235	1.05127	2.07235	up	ZFP91	ZFP91 zinc finger protein	FALSE	Homo sapiens ZFP91 zinc finger protein (ZFP91), transcript variant 1, mRNA [NM_053023]	80829	GO:0070534|GO:0004842|GO:0007250|GO:0016874|GO:0005634|GO:0003676|GO:0046872	58384731	chr11	58384672	+	hs|11q12.1	NM_053023	chr11:58384672-58384731	NM_053023	Hs.524920
A_33_P6816152	2.41863	1.27419	2.41863	up	lnc-GTF2F2-2	lnc-GTF2F2-2:19	FALSE	LNCipedia lincRNA (lnc-GTF2F2-2), lincRNA [lnc-GTF2F2-2:19]			45965014	chr13	45964955	+	hs|13q14.13	AK127569	chr13:45964955-45965014		Hs.375766
A_33_P3424800	2.07015	1.04973	2.07015	up	HLA-B	major histocompatibility complex, class I, B	FALSE	Homo sapiens major histocompatibility complex, class I, B (HLA-B), mRNA [NM_005514]	3106	GO:0002474|GO:0005886|GO:0005783|GO:0019221|GO:0051087|GO:0006955|GO:0060337|GO:0042605|GO:0030670|GO:0071556|GO:0016032|GO:0070062|GO:0060333|GO:0042270|GO:0012507|GO:2001198|GO:0002480|GO:0005794|GO:0002486|GO:0009986|GO:0042612|GO:0042590|GO:0005102|GO:0006952|GO:0002667|GO:0000139|GO:0016020|GO:0005887|GO:0045087|GO:0001916|GO:0031901|GO:0050776|GO:0032655|GO:0002479|GO:0032675|GO:0016021|GO:…	31321722	chr6	31321663	-	hs|6p21.33	NM_005514	chr6:31321722-31321663	NM_005514	Hs.77961
A_22_P00011910	2.20517	1.14089	2.20517	up	IDH1-AS1	IDH1 antisense RNA 1	FALSE	Homo sapiens IDH1 antisense RNA 1 (IDH1-AS1), long non-coding RNA [NR_046452]	100507475		209120854	chr2	209120795	+	hs|2q34	NR_046452	chr2:209120795-209120854	NR_046452	Hs.668038
A_22_P00010013	2.0723	1.05124	2.0723	up	lnc-MME-4	lnc-MME-4:1	FALSE	BX094640 Soares_NFL_T_GBC_S1 Homo sapiens cDNA clone IMAGp998I184013, mRNA sequence [BX094640]			155204896	chr3	155204837	+	hs|3q25.31	BX094640	chr3:155204837-155204896		Hs.128933
A_21_P0006969	17.4909	4.12853	17.4909	up	SFTA1P	surfactant associated 1, pseudogene	FALSE	surfactant associated 1, pseudogene [Source:HGNC Symbol;Acc:HGNC:18383] [ENST00000434919]	207107		10836807	chr10	10828645	-	hs|10p14		chr10:10836807-10828645
A_33_P3306110	2.03219	1.02303	2.03219	up	CALCRL	calcitonin receptor-like	FALSE	Homo sapiens calcitonin receptor-like (CALCRL), transcript variant 1, mRNA [NM_005795]	10203	GO:0004948|GO:0005515|GO:0005886|GO:0004930|GO:0005783|GO:0030819|GO:0001525|GO:0015031|GO:0048661|GO:0005764|GO:0031623|GO:0007507|GO:0006937|GO:0007187|GO:0001605|GO:0005887|GO:0050728|GO:0071329|GO:0008565|GO:0006171|GO:0006816|GO:0007189|GO:0001635|GO:0005768	188207915	chr2	188207856	-	hs|2q32.1	NM_005795	chr2:188207915-188207856	NM_005795	Hs.470882
A_22_P00014836	2.00594	1.00428	2.00594	up	LOC101927963	uncharacterized LOC101927963	FALSE	PREDICTED: Homo sapiens uncharacterized LOC101927963 (LOC101927963), transcript variant X3, ncRNA [XR_426361]	101927963		142136513	chr8	142136454	-	hs|8q24.3	XR_426361	chr8:142136513-142136454	XR_426361
A_23_P19673	2.69918	1.43252	2.69918	up	SGK1	serum/glucocorticoid regulated kinase 1	FALSE	Homo sapiens serum/glucocorticoid regulated kinase 1 (SGK1), transcript variant 1, mRNA [NM_005627]	6446	GO:0005515|GO:0005886|GO:0015459|GO:0032411|GO:0070294|GO:0001558|GO:0005829|GO:0005739|GO:0051090|GO:0005737|GO:0034220|GO:0060453|GO:0042127|GO:0006814|GO:0030334|GO:0007616|GO:0005246|GO:0006950|GO:0006915|GO:0042981|GO:0055085|GO:0005524|GO:0006974|GO:0050790|GO:0004674|GO:0005789|GO:0008217|GO:0006468|GO:0005654|GO:0004712|GO:0017081|GO:0017080	134490715	chr6	134490656	-	hs|6q23.2	NM_005627	chr6:134490715-134490656	NM_005627	Hs.510078
A_24_P105933	5.66983	2.5033	5.66983	up	VIPR1	vasoactive intestinal peptide receptor 1	FALSE	Homo sapiens vasoactive intestinal peptide receptor 1 (VIPR1), transcript variant 1, mRNA [NM_004624]	7433	GO:0043235|GO:0005515|GO:0008284|GO:0006955|GO:0006936|GO:0007186|GO:0005886|GO:0004999|GO:0007187|GO:0005887|GO:0007586|GO:0007268	42578805	chr3	42578746	+	hs|3p22.1	NM_004624	chr3:42578746-42578805	NM_004624	Hs.348500
A_33_P3368500	2.30775	1.20649	2.30775	up	IFT52	intraflagellar transport 52	FALSE	intraflagellar transport 52 [Source:HGNC Symbol;Acc:HGNC:15901] [ENST00000471199]	51098	GO:0006996|GO:0005814|GO:0031514|GO:0070613|GO:0050680|GO:0044292|GO:0072372|GO:0009953|GO:0008022|GO:0001841|GO:0007224|GO:0001947|GO:0005929|GO:0042073|GO:0060271|GO:0030992|GO:0032391|GO:0042733	42275792	chr20	42275733	+	hs|20q13.12	AK097603	chr20:42275733-42275792		Hs.444332
A_33_P3391603	2.2256	1.15419	2.2256	up	LAMA4	laminin, alpha 4	FALSE	Homo sapiens laminin, alpha 4 (LAMA4), transcript variant 5, mRNA [NM_001105209]	3910	GO:0005515|GO:0030334|GO:0005102|GO:0005605|GO:0005606|GO:0005576|GO:0030155|GO:0005604|GO:0031012|GO:0045995|GO:0030198|GO:0007155|GO:0070062|GO:0005201	112575046	chr6	112574987	-	hs|6q21	NM_001105209	chr6:112575046-112574987	NM_001105209	Hs.654572
A_24_P291588	2.10596	1.07448	2.10596	up	DVL3	dishevelled segment polarity protein 3	FALSE	Homo sapiens dishevelled segment polarity protein 3 (DVL3), mRNA [NM_004423]	1857	GO:0005515|GO:0046982|GO:0008013|GO:0038031|GO:0042493|GO:0090263|GO:0090179|GO:0005102|GO:0002020|GO:0005829|GO:0005109|GO:0035556|GO:0003148|GO:0001934|GO:0090103|GO:0043507|GO:0045893|GO:0016055|GO:0090090|GO:0060070|GO:0060071|GO:0035567	183890641	chr3	183890582	+	hs|3q27.1	NM_004423	chr3:183890582-183890641	NM_004423	Hs.388116
A_24_P277934	3.19382	1.67528	3.19382	up	COL1A2	collagen, type I, alpha 2	FALSE	Homo sapiens collagen, type I, alpha 2 (COL1A2), mRNA [NM_000089]	1278	GO:0005515|GO:0046332|GO:0007266|GO:0050900|GO:0005615|GO:0046872|GO:0005584|GO:0042802|GO:0070208|GO:0071230|GO:0022617|GO:0030198|GO:0030199|GO:0030574|GO:0042476|GO:0007179|GO:0030674|GO:0070062|GO:0001568|GO:0048407|GO:0030168|GO:0005576|GO:0006898|GO:0031012|GO:0001501|GO:0007596|GO:0008217|GO:0005788|GO:0043589|GO:0005201	94058702	chr7	94058643	+	hs|7q21.3	NM_000089	chr7:94058643-94058702	NM_000089	Hs.489142
A_24_P116871	2.19683	1.13542	2.19683	up	TXNL4A	thioredoxin-like 4A	FALSE	thioredoxin-like 4A [Source:HGNC Symbol;Acc:HGNC:30551] [ENST00000355491]	10907	GO:0008380|GO:0005515|GO:0010467|GO:0000245|GO:0007067|GO:0000398|GO:0000375|GO:0005681|GO:0005654|GO:0005682|GO:0046540|GO:0051301	77748251	chr18	77737654	-	hs|18q23	AK314901	chr18:77748251-77737654		Hs.465498
A_23_P36825	9.78259	3.29022	9.78259	up	GPRC5A	G protein-coupled receptor, class C, group 5, member A	FALSE	Homo sapiens G protein-coupled receptor, class C, group 5, member A (GPRC5A), mRNA [NM_003979]	9052	GO:0007165|GO:0007186|GO:0005886|GO:0005887|GO:0004930|GO:0030659|GO:0070062|GO:0043231	13065766	chr12	13065707	+	hs|12p13.1	NM_003979	chr12:13065707-13065766	NM_003979	Hs.631733
A_33_P3348887	2.03546	1.02536	2.03546	up	PBX3	pre-B-cell leukemia homeobox 3	FALSE	Homo sapiens pre-B-cell leukemia homeobox 3 (PBX3), transcript variant 1, mRNA [NM_006195]	5090	GO:0007388|GO:0005667|GO:0008344|GO:0006355|GO:0003700|GO:0007387|GO:0007585|GO:0005634|GO:0006351|GO:0021516|GO:0043565|GO:0002087|GO:0048666	128728268	chr9	128728209	+	hs|9q33.3	NM_006195	chr9:128728209-128728268	NM_006195	Hs.428027
A_24_P393864	3.79173	1.92286	3.79173	up	PHTF1	putative homeodomain transcription factor 1	FALSE	Homo sapiens putative homeodomain transcription factor 1 (PHTF1), mRNA [NM_006608]	10745	GO:0005801|GO:0006355|GO:0005737|GO:0003700|GO:0005783|GO:0005730|GO:0005634|GO:0003677|GO:0006351	114248739	chr1	114248680	-	hs|1p13.2	NM_006608	chr1:114248739-114248680	NM_006608	Hs.655824
A_33_P3775848	2.35072	1.2331	2.35072	up	CLIC2	chloride intracellular channel 2	FALSE	Homo sapiens chloride intracellular channel 2 (CLIC2), mRNA [NM_001289]	1193	GO:0005515|GO:0005244|GO:0034707|GO:0051099|GO:0010881|GO:0005634|GO:0004364|GO:0005254|GO:0004602|GO:0005622|GO:0007165|GO:0005737|GO:0010880|GO:0060315|GO:0006810|GO:0055114	154506625	chrX	154506566	-	hs|Xq28	NM_001289	chrX:154506625-154506566	NM_001289	Hs.655445
A_23_P90357	3.00452	1.58714	3.00452	up	TBXA2R	thromboxane A2 receptor	FALSE	Homo sapiens thromboxane A2 receptor (TBXA2R), transcript variant a, mRNA [NM_001060]	6915	GO:0005515|GO:0001669|GO:0005886|GO:0007584|GO:0042493|GO:0030168|GO:0045777|GO:0007204|GO:0045766|GO:0043547|GO:0005085|GO:0006954|GO:0045907|GO:0007186|GO:0045987|GO:0005887|GO:0007596|GO:0019932|GO:0004961|GO:0032496	3594819	chr19	3594760	-	hs|19p13.3	NM_001060	chr19:3594819-3594760	NM_001060	Hs.442530
A_24_P602507	2.22685	1.155	2.22685	up	HYKK	hydroxylysine kinase	FALSE	Homo sapiens hydroxylysine kinase (HYKK), transcript variant 1, mRNA [NM_001013619]	123688	GO:0016310|GO:0005737|GO:0047992	78819879	chr15	78819820	+	hs|15q25.1	NM_001013619	chr15:78819820-78819879	NM_001013619	Hs.307962
A_24_P107336	2.19931	1.13705	2.19931	up	VPS26B	vacuolar protein sorting 26 homolog B (S. pombe)	FALSE	Homo sapiens vacuolar protein sorting 26 homolog B (S. pombe) (VPS26B), mRNA [NM_052875]	112936	GO:0005770|GO:0008565|GO:0042147|GO:0006886|GO:0005769|GO:0043231|GO:0030904|GO:0005829|GO:0005768	134117347	chr11	134117288	+	hs|11q25	NM_052875	chr11:134117288-134117347	NM_052875	Hs.334684
A_24_P173234	2.50064	1.3223	2.50064	up	ZNF613	zinc finger protein 613	FALSE	Homo sapiens zinc finger protein 613 (ZNF613), transcript variant 2, mRNA [NM_024840]	79898	GO:0006355|GO:0005634|GO:0003677|GO:0046872|GO:0006351	52448843	chr19	52448784	+	hs|19q13.41	NM_024840	chr19:52448784-52448843	NM_024840	Hs.183390
A_23_P88069	2.54007	1.34487	2.54007	up	LHFP	lipoma HMGIC fusion partner	FALSE	Homo sapiens lipoma HMGIC fusion partner (LHFP), mRNA [NM_005780]	10186	GO:0016021|GO:0003677	39917176	chr13	39917117	-	hs|13q13.3	NM_005780	chr13:39917176-39917117	NM_005780	Hs.507798
A_19_P00318409	3.56504	1.83392	3.56504	up	NEAT1	nuclear paraspeckle assembly transcript 1 (non-protein coding)	FALSE	Homo sapiens nuclear paraspeckle assembly transcript 1 (non-protein coding) (NEAT1), long non-coding RNA [NR_028272]	283131		65192268	chr11	65192209	+	hs|11q13.1	NR_028272	chr11:65192209-65192268	NR_028272	Hs.523789
A_23_P411296	3.15603	1.65811	3.15603	up	CEBPB	CCAAT/enhancer binding protein (C/EBP), beta	FALSE	Homo sapiens CCAAT/enhancer binding protein (C/EBP), beta (CEBPB), transcript variant 1, mRNA [NM_005194]	1051	GO:0005515|GO:0060850|GO:0000790|GO:0034976|GO:0003700|GO:0006366|GO:0003705|GO:0045408|GO:0005634|GO:0035259|GO:0042803|GO:0016363|GO:0043524|GO:0005737|GO:0006955|GO:0060644|GO:0006954|GO:0071230|GO:0045944|GO:0030182|GO:0032496|GO:0006355|GO:0046982|GO:0001892|GO:0006953|GO:0000978|GO:0003677|GO:0045669|GO:0033598|GO:0001077|GO:0050873|GO:0003682|GO:0045600|GO:0005654|GO:0000779|GO:0045892|GO:…	48809048	chr20	48808989	+	hs|20q13.13	NM_005194	chr20:48808989-48809048	NM_005194	Hs.719041
A_24_P296808	2.9137	1.54285	2.9137	up	PNMAL1	paraneoplastic Ma antigen family-like 1	FALSE	Homo sapiens paraneoplastic Ma antigen family-like 1 (PNMAL1), transcript variant 1, mRNA [NM_018215]	55228		46969838	chr19	46969779	-	hs|19q13.32	NM_018215	chr19:46969838-46969779	NM_018215	Hs.8395
A_23_P53126	2.04413	1.03149	2.04413	up	LMO2	LIM domain only 2 (rhombotin-like 1)	FALSE	Homo sapiens LIM domain only 2 (rhombotin-like 1) (LMO2), transcript variant 1, mRNA [NM_005574]	4005	GO:0005515|GO:0001102|GO:0005667|GO:0097067|GO:0048037|GO:0000977|GO:0001190|GO:0000981|GO:0043425|GO:0070888|GO:0005634|GO:0007275|GO:0001228|GO:0045647|GO:0045944|GO:0003682|GO:0008270|GO:0042789|GO:0035162	33880302	chr11	33880243	-	hs|11p13	NM_005574	chr11:33880302-33880243	NM_005574	Hs.34560
A_23_P20894	2.18818	1.12973	2.18818	up	EHMT1	euchromatic histone-lysine N-methyltransferase 1	FALSE	Homo sapiens euchromatic histone-lysine N-methyltransferase 1 (EHMT1), transcript variant 1, mRNA [NM_024757]	79813	GO:0005515|GO:0005886|GO:0008168|GO:0006325|GO:0005634|GO:0009790|GO:0002039|GO:0005737|GO:0051567|GO:0070734|GO:0005694|GO:0016571|GO:0018027|GO:0000122|GO:0016279|GO:0018026|GO:0018024|GO:0006306|GO:0046974|GO:0008270|GO:0005654|GO:0070742|GO:0045892|GO:0046976|GO:0016568	140712585	chr9	140712526	+	hs|9q34.3	NM_024757	chr9:140712526-140712585	NM_024757	Hs.495511
A_23_P414978	2.32699	1.21846	2.32699	up	NUDT14	nudix (nucleoside diphosphate linked moiety X)-type motif 14	FALSE	Homo sapiens nudix (nucleoside diphosphate linked moiety X)-type motif 14 (NUDT14), mRNA [NM_177533]	256281	GO:0005515|GO:0005737|GO:0047631|GO:0008768|GO:0008152|GO:0046872|GO:0070062	105644053	chr14	105643330	-	hs|14q32.33	NM_177533	chr14:105644053-105643330	NM_177533	Hs.526432
A_33_P3423440	4.82286	2.26989	4.82286	up	ZNF720	zinc finger protein 720	FALSE	Homo sapiens zinc finger protein 720 (ZNF720), mRNA [NM_001130913]	124411	GO:0005622|GO:0006355|GO:0003676	31772864	chr16	31772805	+	hs|16p11.2	NM_001130913	chr16:31772805-31772864	NM_001130913	Hs.528826
A_23_P10506	2.10932	1.07678	2.10932	up	HPGDS	hematopoietic prostaglandin D synthase	FALSE	Homo sapiens hematopoietic prostaglandin D synthase (HPGDS), mRNA [NM_014485]	27306	GO:0019369|GO:0019371|GO:0000287|GO:0006693|GO:0006805|GO:0005509|GO:0004667|GO:0044281|GO:0004364|GO:0042803|GO:0005829|GO:0007165|GO:0005737|GO:0007626	95220773	chr4	95220714	-	hs|4q22.3	NM_014485	chr4:95220773-95220714	NM_014485	Hs.128433
A_23_P904	2.53196	1.34025	2.53196	up	BEND5	BEN domain containing 5	FALSE	Homo sapiens BEN domain containing 5 (BEND5), transcript variant 1, mRNA [NM_024603]	79656	GO:0005794	49201921	chr1	49193667	-	hs|1p33	NM_024603	chr1:49201921-49193667	NM_024603	Hs.475348
A_33_P3213772	2.22372	1.15297	2.22372	up	SRGAP2	SLIT-ROBO Rho GTPase activating protein 2	FALSE	Homo sapiens SLIT-ROBO Rho GTPase activating protein 2 (SRGAP2), transcript variant 4, mRNA [NM_001300952]	23380	GO:0005515|GO:0030054|GO:0005886|GO:0008283|GO:0007264|GO:0005634|GO:0032855|GO:0042803|GO:0005829|GO:0051014|GO:0005737|GO:0007411|GO:0045211|GO:0060548|GO:0034446|GO:0060996|GO:0046847|GO:0030675|GO:0051056|GO:2001223|GO:0003363|GO:0014069|GO:0044327|GO:0030027|GO:0021816|GO:0045335|GO:0048365|GO:0048812	206629505	chr1	206629446	+	hs|1q32.1	NM_001300952	chr1:206629446-206629505	NM_001300952	Hs.497575
A_33_P3361257	2.34916	1.23215	2.34916	up	NOP16	NOP16 nucleolar protein	FALSE	Homo sapiens NOP16 nucleolar protein (NOP16), transcript variant 3, mRNA [NM_016391]	51491	GO:0005730|GO:0042273|GO:0005634|GO:0043231	175811304	chr5	175811245	-	hs|5q35.2	NM_016391	chr5:175811304-175811245	NM_016391	Hs.696283
A_22_P00023602	2.08691	1.06137	2.08691	up			FALSE	PREDICTED: Homo sapiens uncharacterized LOC101927300 (LOC101927300), transcript variant X2, ncRNA [XR_428799]			101195540	chr10	101195481	+	hs|10q24.2	XR_428799	chr10:101195481-101195540	XR_428799
A_33_P3411632	2.43431	1.28351	2.43431	up	TMEM121	transmembrane protein 121	FALSE	Homo sapiens transmembrane protein 121 (TMEM121), mRNA [NM_025268]	80757	GO:0008150|GO:0003674|GO:0016021|GO:0005575	105996537	chr14	105996478	+	hs|14q32.33	NM_025268	chr14:105996478-105996537	NM_025268	Hs.157527
A_33_P3239185	2.72238	1.44487	2.72238	up	SYT7	synaptotagmin VII	FALSE	Homo sapiens synaptotagmin VII (SYT7), transcript variant 1, mRNA [NM_001252065]	9066	GO:0005215|GO:0030054|GO:0005886|GO:0005509|GO:0031045|GO:0006887|GO:0005764|GO:0005544|GO:0050796|GO:0045956|GO:0001778|GO:0030672|GO:0016021|GO:0070062	61282853	chr11	61282794	-	hs|11q12.2	NM_001252065	chr11:61282853-61282794	NM_001252065	Hs.131188
A_23_P161156	2.06808	1.04829	2.06808	up	ZNF438	zinc finger protein 438	FALSE	Homo sapiens zinc finger protein 438 (ZNF438), transcript variant 2, mRNA [NM_182755]	220929	GO:0006355|GO:0005737|GO:0003700|GO:0005654|GO:0005634|GO:0045892|GO:0003677|GO:0046872|GO:0006351	31133829	chr10	31133770	-	hs|10p11.23	NM_182755	chr10:31133829-31133770	NM_182755	Hs.660642
A_23_P99661	2.23648	1.16123	2.23648	up	ARHGEF40	Rho guanine nucleotide exchange factor (GEF) 40	FALSE	Homo sapiens Rho guanine nucleotide exchange factor (GEF) 40 (ARHGEF40), transcript variant 1, mRNA [NM_018071]	55701	GO:0005737|GO:0032321|GO:0005089	21557670	chr14	21557611	+	hs|14q11.2	NM_018071	chr14:21557611-21557670	NM_018071	Hs.35125
A_22_P00005311	2.63156	1.39592	2.63156	up	lnc-DNAJC7-1	lnc-DNAJC7-1:1	FALSE	LNCipedia lincRNA (lnc-DNAJC7-1), lincRNA [lnc-DNAJC7-1:1]			40126103	chr17	40126044	-	hs|17q21.2		chr17:40126103-40126044
A_24_P206624	2.60704	1.38241	2.60704	up	FGFR2	fibroblast growth factor receptor 2	FALSE	Homo sapiens fibroblast growth factor receptor 2 (FGFR2), transcript variant 2, mRNA [NM_022970]	2263	GO:0005515|GO:0001657|GO:0033688|GO:0007409|GO:0009791|GO:0021860|GO:0042803|GO:0043231|GO:0031069|GO:0009880|GO:0007173|GO:0009887|GO:0005938|GO:0042472|GO:0005794|GO:0009986|GO:0017134|GO:0010453|GO:0030916|GO:0010518|GO:0018108|GO:0000122|GO:0001701|GO:0005887|GO:0008543|GO:0005654|GO:0038095|GO:0008286|GO:0008284|GO:0021847|GO:0005886|GO:0030324|GO:0007267|GO:0030177|GO:0005634|GO:0001837|GO:…	123243276	chr10	123243217	-	hs|10q26.13	NM_022970	chr10:123243276-123243217	NM_022970	Hs.533683
A_23_P78289	2.09333	1.0658	2.09333	up	FAM104A	family with sequence similarity 104, member A	FALSE	Homo sapiens family with sequence similarity 104, member A (FAM104A), transcript variant 2, mRNA [NM_032837]	84923		71203606	chr17	71203547	-	hs|17q25.1	NM_032837	chr17:71203606-71203547	NM_032837	Hs.741276
A_24_P605190	7.5319	2.91301	7.5319	up	PGGT1B	protein geranylgeranyltransferase type I, beta subunit	FALSE	Homo sapiens protein geranylgeranyltransferase type I, beta subunit (PGGT1B), mRNA [NM_005023]	5229	GO:0042277|GO:0004661|GO:0008284|GO:0018344|GO:0008144|GO:0004662|GO:0008270|GO:0034097|GO:0019840|GO:0051771|GO:0045787|GO:0005953	114547105	chr5	114547046	-	hs|5q22.3	NM_005023	chr5:114547105-114547046	NM_005023	Hs.254006
A_33_P3375934	3.16205	1.66086	3.16205	up	NAMPT	nicotinamide phosphoribosyltransferase	FALSE	Homo sapiens nicotinamide phosphoribosyltransferase (NAMPT), mRNA [NM_005746]	10135	GO:0005515|GO:0008286|GO:0014070|GO:0008284|GO:0047280|GO:0007267|GO:0019674|GO:0006767|GO:0005634|GO:0006769|GO:0044281|GO:0005615|GO:0042803|GO:0005829|GO:0008144|GO:0045944|GO:0009435|GO:0070062|GO:0007565|GO:0005125|GO:0048661|GO:0032922|GO:0007165|GO:0006766|GO:0004514|GO:0007623|GO:0051770|GO:0060612	105888852	chr7	105888793	-	hs|7q22.3	NM_005746	chr7:105888852-105888793	NM_005746	Hs.489615
A_33_P3374049	2.09281	1.06544	2.09281	up	KIAA2013	KIAA2013	FALSE	Homo sapiens KIAA2013 (KIAA2013), mRNA [NM_138346]	90231	GO:0016020|GO:0016021	11983138	chr1	11983079	-	hs|1p36.22	NM_138346	chr1:11983138-11983079	NM_138346	Hs.520094
A_33_P3354539	2.36586	1.24237	2.36586	up	CHURC1	churchill domain containing 1	FALSE	Homo sapiens churchill domain containing 1 (CHURC1), transcript variant 1, mRNA [NM_145165]	91612	GO:0008270|GO:0007275|GO:0045893|GO:0006351	65401766	chr14	65401707	+	hs|14q23.3	NM_145165	chr14:65401707-65401766	NM_145165	Hs.731537
A_22_P00021949	5.14877	2.36423	5.14877	up	lnc-EGR3-1	lnc-EGR3-1:1	FALSE	Homo sapiens mRNA; cDNA DKFZp686J2011 (from clone DKFZp686J2011). [AL833160]			22536612	chr8	22536553	-	hs|8p21.3	AL833160	chr8:22536612-22536553		Hs.638582
A_24_P177553	2.84865	1.51028	2.84865	up			FALSE	AGENCOURT_10615922 NIH_MGC_141 Homo sapiens cDNA clone IMAGE:6744194 5', mRNA sequence [BU963192]			122928691	chr11	122928632	-	hs|11q24.1	BU963192	chr11:122928691-122928632		Hs.730273
A_33_P3274935	2.03565	1.02549	2.03565	up	HID1	HID1 domain containing	FALSE	Homo sapiens HID1 domain containing (HID1), mRNA [NM_030630]	283987	GO:0005515|GO:0005881|GO:0031001|GO:0005737|GO:0005794|GO:0000138|GO:0005797|GO:0006886|GO:0070062	72946899	chr17	72946840	-	hs|17q25.1	NM_030630	chr17:72946899-72946840	NM_030630	Hs.11067
A_23_P205007	2.0255	1.01828	2.0255	up	IPO5	importin 5	FALSE	Homo sapiens importin 5 (IPO5), mRNA [NM_002271]	3843	GO:0005515|GO:0031965|GO:0005794|GO:0005730|GO:0005634|GO:0043086|GO:0006607|GO:0043231|GO:0005737|GO:0071230|GO:0006610|GO:0016020|GO:0005643|GO:0008536|GO:0008565|GO:0042307|GO:0016032|GO:0005654|GO:0005095	98676273	chr13	98676214	+	hs|13q32.2	NM_002271	chr13:98676214-98676273	NM_002271	Hs.712598
A_23_P201628	2.70564	1.43597	2.70564	up	LAMC1	laminin, gamma 1 (formerly LAMB2)	FALSE	Homo sapiens laminin, gamma 1 (formerly LAMB2) (LAMC1), mRNA [NM_002293]	3915	GO:0050679|GO:0005606|GO:0005576|GO:0043260|GO:0005615|GO:0005604|GO:0031012|GO:0043259|GO:0006461|GO:0007492|GO:0016477|GO:0022617|GO:0043208|GO:0007411|GO:0030198|GO:0031581|GO:0034446|GO:0007155|GO:0070062|GO:0005201	183114465	chr1	183114406	+	hs|1q25.3	NM_002293	chr1:183114406-183114465	NM_002293	Hs.609663
A_33_P3308626	2.41394	1.27139	2.41394	up	MON1B	MON1 secretory trafficking family member B	FALSE	Homo sapiens MON1 secretory trafficking family member B (MON1B), transcript variant 1, mRNA [NM_014940]	22879	GO:0005515|GO:0016192|GO:0012505	77229557	chr16	77229498	+	hs|16q23.1	NM_014940	chr16:77229498-77229557	NM_014940	Hs.513743
A_33_P3374723	2.01497	1.01076	2.01497	up	ZEB1	zinc finger E-box binding homeobox 1	FALSE	Homo sapiens zinc finger E-box binding homeobox 1 (ZEB1), transcript variant 1, mRNA [NM_001128128]	6935	GO:0005515|GO:0007389|GO:0003700|GO:0008285|GO:0010464|GO:0051216|GO:0008283|GO:0071560|GO:0033081|GO:0048704|GO:0005634|GO:0048752|GO:0048596|GO:0005737|GO:0006955|GO:0003690|GO:0071230|GO:0030857|GO:0045944|GO:0090103|GO:0031667|GO:0017015|GO:0005667|GO:0014823|GO:0051150|GO:0006357|GO:0003714|GO:0003713|GO:0070888|GO:0000122|GO:0006351|GO:0045666|GO:0003682|GO:0005654|GO:0008270|GO:0030900|GO:…	31818122	chr10	31818063	+	hs|10p11.22	NM_001128128	chr10:31818063-31818122	NM_001128128	Hs.124503
A_23_P51126	4.05393	2.01932	4.05393	up	IL1RL1	interleukin 1 receptor-like 1	FALSE	Homo sapiens interleukin 1 receptor-like 1 (IL1RL1), transcript variant 1, mRNA [NM_016232]	9173	GO:0005515|GO:0032754|GO:0004896|GO:0043032|GO:0002113|GO:0005576|GO:0035556|GO:0031012|GO:0007165|GO:0002114|GO:0006955|GO:0050729|GO:0002826|GO:0004908|GO:0005057|GO:0016021|GO:0032689|GO:0009897|GO:0090197|GO:0043124	102959818	chr2	102959759	+	hs|2q12.1	NM_016232	chr2:102959759-102959818	NM_016232	Hs.66
A_24_P292253	4.2415	2.08457	4.2415	up	ITIH5	inter-alpha-trypsin inhibitor heavy chain family, member 5	FALSE	Homo sapiens inter-alpha-trypsin inhibitor heavy chain family, member 5 (ITIH5), transcript variant 1, mRNA [NM_030569]	80760	GO:0010951|GO:0004867|GO:0030212|GO:0005576	7602674	chr10	7602615	-	hs|10p14	NM_030569	chr10:7602674-7602615	NM_030569	Hs.498586
A_23_P140978	2.76446	1.467	2.76446	up	ZNF263	zinc finger protein 263	FALSE	Homo sapiens zinc finger protein 263 (ZNF263), mRNA [NM_005741]	10127	GO:0006355|GO:0005737|GO:0003700|GO:0015630|GO:0005654|GO:0005634|GO:0045892|GO:0003677|GO:0046872|GO:0006351	3340584	chr16	3340525	+	hs|16p13.3	NM_005741	chr16:3340525-3340584	NM_005741	Hs.611475
A_24_P71373	2.96177	1.56646	2.96177	up	SLC9A1	solute carrier family 9, subfamily A (NHE1, cation proton antiporter 1), member 1	FALSE	Homo sapiens solute carrier family 9, subfamily A (NHE1, cation proton antiporter 1), member 1 (SLC9A1), transcript variant 1, mRNA [NM_003047]	6548	GO:0005515|GO:0005516|GO:0030346|GO:0030307|GO:0051492|GO:0006883|GO:0030011|GO:0071468|GO:0051259|GO:0006885|GO:0071436|GO:0071257|GO:0086003|GO:0045760|GO:0030674|GO:0035794|GO:0055007|GO:0030203|GO:0070062|GO:0032869|GO:0009986|GO:0005975|GO:0005546|GO:0035994|GO:0070886|GO:0030027|GO:0071872|GO:0005887|GO:0070997|GO:0005789|GO:0051453|GO:0016049|GO:0005654|GO:0045121|GO:0005925|GO:0051930|GO:…	27426044	chr1	27425985	-	hs|1p36.11	NM_003047	chr1:27426044-27425985	NM_003047	Hs.469116
A_23_P156017	2.07237	1.05128	2.07237	up	GOLPH3	golgi phosphoprotein 3 (coat-protein)	FALSE	Homo sapiens golgi phosphoprotein 3 (coat-protein) (GOLPH3), mRNA [NM_022130]	64083	GO:0005802|GO:0005515|GO:0010467|GO:0009306|GO:0032008|GO:0005886|GO:0008283|GO:0043001|GO:0030032|GO:0070273|GO:0050714|GO:0050901|GO:0005829|GO:0005739|GO:0060352|GO:0005758|GO:0009101|GO:0032580|GO:0045053|GO:0007030|GO:0005794|GO:0010821|GO:0031985|GO:0016477|GO:0048194|GO:0005654|GO:0019899|GO:0005768	32125336	chr5	32125277	-	hs|5p13.3	NM_022130	chr5:32125336-32125277	NM_022130	Hs.408909
A_24_P390495	5.31962	2.41132	5.31962	up	CX3CL1	chemokine (C-X3-C motif) ligand 1	FALSE	chemokine (C-X3-C motif) ligand 1 [Source:HGNC Symbol;Acc:HGNC:10647] [ENST00000006053]	6376	GO:0005515|GO:0008009|GO:0005886|GO:0009986|GO:0030595|GO:0060055|GO:0030593|GO:0019221|GO:0005102|GO:0005576|GO:0006952|GO:0005615|GO:0050902|GO:0045766|GO:0051041|GO:0032914|GO:0006955|GO:0006935|GO:0050729|GO:2001240|GO:0048247|GO:0048246|GO:0016021|GO:0007155	57418084	chr16	57418025	+	hs|16q21	AB209037	chr16:57418025-57418084		Hs.531668
A_23_P53137	2.80279	1.48687	2.80279	up	HBG1	hemoglobin, gamma A	FALSE	Homo sapiens hemoglobin, gamma A (HBG1), mRNA [NM_000559]	3047	GO:0019825|GO:0005833|GO:0005506|GO:0007596|GO:0005344|GO:0020037|GO:0015671|GO:0005829	5269593	chr11	5269534	-	hs|11p15.4	NM_000559	chr11:5269593-5269534	NM_000559	Hs.702189
A_33_P3839897	3.28391	1.71541	3.28391	up	RNU4ATAC	RNA, U4atac small nuclear (U12-dependent splicing)	FALSE	HHAGE001732 Human liver regeneration after partial hepatectomy Homo sapiens cDNA, mRNA sequence [DW419002]	100151683		122288849	chr2	122288790	+	hs|2q14.2	DW419002	chr2:122288790-122288849		Hs.689638
A_23_P103661	2.09204	1.06491	2.09204	up	YY1AP1	YY1 associated protein 1	FALSE	Homo sapiens YY1 associated protein 1 (YY1AP1), transcript variant 2, mRNA [NM_139118]	55249	GO:0005515|GO:0006355|GO:0005737|GO:0051726|GO:0005634|GO:0006351	155629483	chr1	155629424	-	hs|1q22	NM_139118	chr1:155629483-155629424	NM_139118	Hs.584927
A_24_P316939	2.34752	1.23114	2.34752	up	LRRFIP1	leucine rich repeat (in FLII) interacting protein 1	FALSE	Homo sapiens leucine rich repeat (in FLII) interacting protein 1 (LRRFIP1), transcript variant 1, mRNA [NM_001137550]	9208	GO:0003725|GO:0005515|GO:0005886|GO:0006357|GO:0005634|GO:0005575|GO:0003677|GO:0042803|GO:0006351|GO:0005829|GO:0008150|GO:0005737|GO:0045087|GO:0032481|GO:0005856|GO:0045892	238688617	chr2	238688558	+	hs|2q37.3	NM_001137550	chr2:238688558-238688617	NM_001137550	Hs.471779
A_33_P3225843	2.53946	1.34452	2.53946	up	CCDC149	coiled-coil domain containing 149	FALSE	Homo sapiens coiled-coil domain containing 149 (CCDC149), transcript variant 1, mRNA [NM_173463]	91050		24809873	chr4	24809814	-	hs|4p15.2	NM_173463	chr4:24809873-24809814	NM_173463	Hs.106432
A_23_P28652	2.84693	1.50941	2.84693	up	ATRAID	all-trans retinoic acid-induced differentiation factor	FALSE	Homo sapiens all-trans retinoic acid-induced differentiation factor (ATRAID), transcript variant 1, mRNA [NM_016085]	51374	GO:0045669|GO:0010468|GO:0005515|GO:2000599|GO:0003674|GO:0048471|GO:0033689|GO:0030501|GO:0005886|GO:0016021|GO:0005635|GO:0030154	27438618	chr2	27438559	+	hs|2p23.3	NM_016085	chr2:27438559-27438618	NM_016085	Hs.9527
A_19_P00322934	2.02349	1.01685	2.02349	up	LINC00963	long intergenic non-protein coding RNA 963	FALSE	long intergenic non-protein coding RNA 963 [Source:HGNC Symbol;Acc:HGNC:48716] [ENST00000608369]	100506190		132255799	chr9	132255740	+	hs|9q34.11		chr9:132255740-132255799		Hs.529860
A_23_P56559	3.76215	1.91156	3.76215	up	DHRS9	dehydrogenase/reductase (SDR family) member 9	FALSE	Homo sapiens dehydrogenase/reductase (SDR family) member 9 (DHRS9), transcript variant 3, mRNA [NM_001142270]	10170	GO:0004022|GO:0008209|GO:0042904|GO:0042572|GO:0042448|GO:0030855|GO:0047035|GO:0005789|GO:0030176|GO:0016854|GO:0004745|GO:0055114	169952434	chr2	169952375	+	hs|2q31.1	NM_001142270	chr2:169952375-169952434	NM_001142270	Hs.179608
A_23_P134925	2.09406	1.0663	2.09406	up	BNIP3L	BCL2/adenovirus E1B 19kDa interacting protein 3-like	FALSE	Homo sapiens BCL2/adenovirus E1B 19kDa interacting protein 3-like (BNIP3L), mRNA [NM_004331]	665	GO:0005515|GO:0043066|GO:0043065|GO:0046982|GO:0005783|GO:0035694|GO:0005741|GO:0031224|GO:0005635|GO:0042803|GO:0042802|GO:0005739|GO:0051607|GO:0016032|GO:0016021|GO:0005521	26270345	chr8	26270286	+	hs|8p21.2	NM_004331	chr8:26270286-26270345	NM_004331	Hs.131226
A_23_P419947	6.82962	2.77181	6.82962	up	MLF1	myeloid leukemia factor 1	FALSE	Homo sapiens myeloid leukemia factor 1 (MLF1), transcript variant 1, mRNA [NM_022443]	4291	GO:0005515|GO:0005737|GO:0019904|GO:0007050|GO:0005654|GO:0005634|GO:0002318|GO:0003677|GO:0006351	158315933	chr3	158315874	+	hs|3q25.32	NM_022443	chr3:158315874-158315933	NM_022443	Hs.85195
A_23_P19182	2.14034	1.09784	2.14034	up	REEP2	receptor accessory protein 2	FALSE	Homo sapiens receptor accessory protein 2 (REEP2), transcript variant 2, mRNA [NM_016606]	51308	GO:0005881|GO:0032386|GO:0050913|GO:0005887|GO:0005783|GO:0071786|GO:0031883|GO:0005789|GO:0050916|GO:0032596|GO:0070062	137782636	chr5	137782577	+	hs|5q31.2	NM_016606	chr5:137782577-137782636	NM_016606	Hs.416090
A_23_P63190	2.09599	1.06763	2.09599	up	NRAS	neuroblastoma RAS viral (v-ras) oncogene homolog	FALSE	Homo sapiens neuroblastoma RAS viral (v-ras) oncogene homolog (NRAS), mRNA [NM_002524]	4893	GO:0008286|GO:0008284|GO:0030036|GO:0005886|GO:0035022|GO:0007264|GO:0007265|GO:0050900|GO:0032403|GO:0000186|GO:0043524|GO:0007173|GO:0007411|GO:0000165|GO:0048169|GO:0070062|GO:0048010|GO:0048011|GO:0048642|GO:0005525|GO:0006184|GO:0060441|GO:0000139|GO:0016020|GO:0007596|GO:0008543|GO:0008542|GO:0032228|GO:0045087|GO:0045596|GO:0051146|GO:0038095	115249992	chr1	115249933	-	hs|1p13.2	NM_002524	chr1:115249992-115249933	NM_002524	Hs.486502
A_24_P33156	2.20325	1.13963	2.20325	up	AFMID	arylformamidase	FALSE	Homo sapiens arylformamidase (AFMID), transcript variant 2, mRNA [NM_001010982]	125061	GO:0034641|GO:0006569|GO:0019441|GO:0004061|GO:0005634|GO:0044281|GO:0034354|GO:0005829	76202112	chr17	76202053	+	hs|17q25.3	NM_001010982	chr17:76202053-76202112	NM_001010982	Hs.558614
A_23_P113393	2.59347	1.37488	2.59347	up	APLN	apelin	FALSE	Homo sapiens apelin (APLN), mRNA [NM_017413]	8862	GO:0007165|GO:0006955|GO:0001664|GO:0007595|GO:0005179|GO:0023052|GO:0005102|GO:0005576|GO:0005615|GO:0031704	128779470	chrX	128779411	-	hs|Xq26.1	NM_017413	chrX:128779470-128779411	NM_017413	Hs.303084
A_23_P71419	2.13842	1.09655	2.13842	up	COPS5	COP9 signalosome subunit 5	FALSE	Homo sapiens COP9 signalosome subunit 5 (COPS5), mRNA [NM_006837]	10987	GO:0005515|GO:0000338|GO:0048471|GO:0016579|GO:0030054|GO:0004843|GO:0005852|GO:0006366|GO:0010388|GO:0003713|GO:0003743|GO:0005634|GO:0006412|GO:0046872|GO:0006413|GO:0008021|GO:0046328|GO:0005737|GO:0008180|GO:0045944|GO:0051726|GO:0006508|GO:0005654|GO:0008237	67963495	chr8	67958167	-	hs|8q13.1	NM_006837	chr8:67963495-67958167	NM_006837	Hs.491912
A_21_P0000781	2.12101	1.08475	2.12101	up	HOTAIRM1	HOXA transcript antisense RNA, myeloid-specific 1	FALSE	Homo sapiens HOXA transcript antisense RNA, myeloid-specific 1 (HOTAIRM1), transcript variant 1, long non-coding RNA [NR_038366]	100506311		27139860	chr7	27139801	+	hs|7p15.2	NR_038366	chr7:27139801-27139860	NR_038366	Hs.445239
A_23_P431569	3.69201	1.8844	3.69201	up	LOC100049716	uncharacterized LOC100049716	FALSE	Homo sapiens uncharacterized LOC100049716 (LOC100049716), long non-coding RNA [NR_122124]	100049716		754557	chr12	754498	+	hs|12p13.33	NR_122124	chr12:754498-754557	NR_122124	Hs.655804
A_24_P6030	2.63473	1.39765	2.63473	up			FALSE	small integral membrane protein 11 [Source:HGNC Symbol;Acc:HGNC:1293] [ENST00000481710]			35774956	chr21	35774897	+	hs|21q22.11	XM_006723951	chr21:35774897-35774956	XM_006723951	Hs.656195
A_33_P3289251	4.12883	2.04573	4.12883	up	LOC644727	uncharacterized LOC644727	FALSE	Homo sapiens cDNA FLJ38652 fis, clone HHDPC2008843. [AK095971]	644727		53628369	chr8	53628310	+	hs|8q11.23	AK095971	chr8:53628310-53628369		Hs.196102
A_23_P48217	4.18692	2.06589	4.18692	up	APOLD1	apolipoprotein L domain containing 1	FALSE	Homo sapiens apolipoprotein L domain containing 1 (APOLD1), transcript variant 2, mRNA [NM_030817]	81575	GO:0001666|GO:0005886|GO:0006869|GO:0042157|GO:0042118|GO:0005576|GO:0016021|GO:0001525|GO:0030154|GO:0045601|GO:0008289	12944238	chr12	12944179	+	hs|12p13.1	NM_030817	chr12:12944179-12944238	NM_030817	Hs.23388
A_33_P3321946	2.01889	1.01356	2.01889	up	MOSPD3	motile sperm domain containing 3	FALSE	Homo sapiens motile sperm domain containing 3 (MOSPD3), transcript variant 1, mRNA [NM_023948]	64598	GO:0007507|GO:0016021	100212987	chr7	100212928	+	hs|7q22.1	NM_023948	chr7:100212928-100212987	NM_023948	Hs.521086
A_23_P1072	2.0222	1.01592	2.0222	up	ATP1A1	ATPase, Na+/K+ transporting, alpha 1 polypeptide	FALSE	Homo sapiens ATPase, Na+/K+ transporting, alpha 1 polypeptide (ATP1A1), transcript variant 1, mRNA [NM_000701]	476	GO:0005515|GO:0006883|GO:0060048|GO:0034220|GO:0086009|GO:0045822|GO:0045823|GO:0086004|GO:0005391|GO:0070062|GO:0042470|GO:0005794|GO:0019901|GO:0019904|GO:0030506|GO:0010107|GO:0030955|GO:0086064|GO:0005890|GO:0043234|GO:0060081|GO:0043531|GO:0002026|GO:0016311|GO:0071383|GO:0002028|GO:0086013|GO:0055119|GO:0043548|GO:0005886|GO:0005783|GO:0051087|GO:0031402|GO:0016791|GO:0016323|GO:0016324|GO:…	116946524	chr1	116944237	+	hs|1p13.1	NM_000701	chr1:116944237-116946524	NM_000701	Hs.371889
A_23_P163087	5.75183	2.52402	5.75183	up	NID2	nidogen 2 (osteonidogen)	FALSE	Homo sapiens nidogen 2 (osteonidogen) (NID2), mRNA [NM_007361]	22795	GO:0031012|GO:0005515|GO:0009986|GO:0007160|GO:0030198|GO:0005518|GO:0005509|GO:0071711|GO:0005576|GO:0007155|GO:0070062|GO:0005604	52471790	chr14	52471731	-	hs|14q22.1	NM_007361	chr14:52471790-52471731	NM_007361	Hs.369840
A_21_P0000189	2.05532	1.03936	2.05532	up	DR1	down-regulator of transcription 1, TBP-binding (negative cofactor 2)	FALSE	Homo sapiens down-regulator of transcription 1, TBP-binding (negative cofactor 2) (DR1), mRNA [NM_001938]	1810	GO:0005515|GO:0046982|GO:0003714|GO:0006325|GO:0005634|GO:0000122|GO:0003677|GO:0006351|GO:0043565|GO:0043966|GO:0005671|GO:0017025|GO:0008134	93827924	chr1	93827865	+	hs|1p22.1	NM_001938	chr1:93827865-93827924	NM_001938	Hs.348418
A_23_P166	2.74668	1.45769	2.74668	up	MOB3C	MOB kinase activator 3C	FALSE	Homo sapiens MOB kinase activator 3C (MOB3C), transcript variant 1, mRNA [NM_145279]	148932	GO:0046872	47073825	chr1	47073766	-	hs|1p33	NM_145279	chr1:47073825-47073766	NM_145279	Hs.632401
A_33_P3212782	2.4003	1.26321	2.4003	up	CALM2	calmodulin 2 (phosphorylase kinase, delta)	FALSE	Homo sapiens calmodulin 2 (phosphorylase kinase, delta) (CALM2), mRNA [NM_001743]	805	GO:0005515|GO:0005513|GO:0007603|GO:0030017|GO:0006936|GO:0007173|GO:0043274|GO:0016056|GO:0010800|GO:0005813|GO:0032465|GO:0006996|GO:0019901|GO:0005975|GO:0008179|GO:0005509|GO:0019904|GO:0030168|GO:0022400|GO:0010801|GO:0044325|GO:0031432|GO:0000922|GO:0007186|GO:0002027|GO:0051000|GO:0008543|GO:0045087|GO:0005654|GO:0007005|GO:0030801|GO:0043539|GO:0038095|GO:0005980|GO:0048306|GO:0043548|GO:…	47387937	chr2	47387878	-	hs|2p21	NM_001743	chr2:47387937-47387878	NM_001743	Hs.468442
A_23_P102770	2.12238	1.08568	2.12238	up	NAA20	N(alpha)-acetyltransferase 20, NatB catalytic subunit	FALSE	Homo sapiens N(alpha)-acetyltransferase 20, NatB catalytic subunit (NAA20), transcript variant 1, mRNA [NM_016100]	51126	GO:0005622|GO:0031416|GO:0005737|GO:0017196|GO:0004596|GO:0005634	20013918	chr20	20013859	+	hs|20p11.23	NM_016100	chr20:20013859-20013918	NM_016100	Hs.368783
A_33_P3225046	2.35596	1.23631	2.35596	up	CD34	CD34 molecule	FALSE	Homo sapiens CD34 molecule (CD34), transcript variant 1, mRNA [NM_001025109]	947	GO:2001214|GO:0060290|GO:0050900|GO:0005764|GO:0071636|GO:0061042|GO:0016337|GO:0009925|GO:0001894|GO:1900168|GO:0072089|GO:0032720|GO:0071425|GO:0036053|GO:0005887|GO:0050776|GO:0071971|GO:0035759|GO:0009897|GO:0008134|GO:0072011|GO:0048471|GO:0071657|GO:0032733|GO:0005886|GO:0042482|GO:0008283|GO:0016324|GO:0005737|GO:0045019|GO:0048870|GO:0072254|GO:1900041|GO:0030097|GO:0003158|GO:0043199|GO:…	208062091	chr1	208062032	-	hs|1q32.2	NM_001025109	chr1:208062091-208062032	NM_001025109	Hs.374990
A_33_P3350621	3.37461	1.75472	3.37461	up	CNRIP1	cannabinoid receptor interacting protein 1	FALSE	Homo sapiens cannabinoid receptor interacting protein 1 (CNRIP1), transcript variant CRIP1b, mRNA [NM_001111101]	25927		68511385	chr2	68511326	-	hs|2p14	NM_001111101	chr2:68511385-68511326	NM_001111101	Hs.212885
A_23_P218463	4.45963	2.15692	4.45963	up	SERTAD1	SERTA domain containing 1	FALSE	Homo sapiens SERTA domain containing 1 (SERTAD1), mRNA [NM_013376]	29950	GO:0005515|GO:0008284|GO:0000079|GO:0045893|GO:0006351	40928494	chr19	40928435	-	hs|19q13.2	NM_013376	chr19:40928494-40928435	NM_013376	Hs.269898
A_23_P54000	2.32751	1.21879	2.32751	up	SNX6	sorting nexin 6	FALSE	Homo sapiens sorting nexin 6 (SNX6), transcript variant 1, mRNA [NM_021249]	58533	GO:0005515|GO:0034452|GO:0005634|GO:0006886|GO:0042803|GO:0006897|GO:0005622|GO:0016050|GO:0005737|GO:0007175|GO:0031901|GO:0042147|GO:0016023|GO:0035091|GO:0045892|GO:0030512|GO:0019898|GO:0030904	35031706	chr14	35031647	-	hs|14q13.1	NM_021249	chr14:35031706-35031647	NM_021249	Hs.356647
A_33_P3273436	2.07134	1.05057	2.07134	up	GALM	galactose mutarotase (aldose 1-epimerase)	FALSE	Homo sapiens galactose mutarotase (aldose 1-epimerase) (GALM), mRNA [NM_138801]	130589	GO:0005737|GO:0004034|GO:0030246|GO:0006006|GO:0006012|GO:0070062	38960898	chr2	38960839	+	hs|2p22.1	NM_138801	chr2:38960839-38960898	NM_138801	Hs.435012
A_23_P139820	2.06224	1.04421	2.06224	up	SLC11A2	solute carrier family 11 (proton-coupled divalent metal ion transporter), member 2	FALSE	Homo sapiens solute carrier family 11 (proton-coupled divalent metal ion transporter), member 2 (SLC11A2), transcript variant 4, mRNA [NM_000617]	4891	GO:0005802|GO:0005515|GO:0015078|GO:0035434|GO:0005765|GO:0005764|GO:0010042|GO:0006879|GO:0070835|GO:0006878|GO:0022890|GO:0071356|GO:0070574|GO:0010039|GO:0007611|GO:0016151|GO:0010288|GO:0015692|GO:0005506|GO:0009986|GO:0015099|GO:0005507|GO:0015087|GO:0015086|GO:0015085|GO:0015093|GO:0015100|GO:0015094|GO:0060586|GO:0006783|GO:0003032|GO:0005887|GO:0008270|GO:0071421|GO:0046686|GO:0071281|GO:…	51384602	chr12	51382184	-	hs|12q13.12	NM_000617	chr12:51384602-51382184	NM_000617	Hs.505545
A_22_P00018083	2.37908	1.2504	2.37908	up	ZNF366	zinc finger protein 366	FALSE	Homo sapiens zinc finger protein 366 (ZNF366), mRNA [NM_152625]	167465	GO:0005515|GO:0043627|GO:0003714|GO:0030331|GO:0005634|GO:0033147|GO:0000122|GO:0003677|GO:0046872|GO:0006351	71735819	chr5	71735760	-	hs|5q13.2	NM_152625	chr5:71735819-71735760	NM_152625	Hs.370303
A_23_P28707	2.04401	1.0314	2.04401	up	OGFR	opioid growth factor receptor	FALSE	Homo sapiens opioid growth factor receptor (OGFR), mRNA [NM_007346]	11054	GO:0005737|GO:0016020|GO:0005634|GO:0038003|GO:0005575|GO:0001558|GO:0004985	61445272	chr20	61445213	+	hs|20q13.33	NM_007346	chr20:61445213-61445272	NM_007346	Hs.67896
A_24_P415601	2.00189	1.00136	2.00189	up	RNH1	ribonuclease/angiogenin inhibitor 1	FALSE	Homo sapiens ribonuclease/angiogenin inhibitor 1 (RNH1), transcript variant 1, mRNA [NM_002939]	6050	GO:0005515|GO:0005737|GO:0032311|GO:0008428|GO:0045765|GO:0006402|GO:0043086|GO:0070062	498093	chr11	498034	-	hs|11p15.5	NM_002939	chr11:498093-498034	NM_002939	Hs.530687
A_24_P58488	7.70541	2.94587	7.70541	up	C2orf73	chromosome 2 open reading frame 73	FALSE	Homo sapiens chromosome 2 open reading frame 73 (C2orf73), mRNA [NM_001100396]	129852		54587675	chr2	54587616	+	hs|2p16.2	NM_001100396	chr2:54587616-54587675	NM_001100396	Hs.732626
A_33_P3409392	2.34296	1.22833	2.34296	up	FZD6	frizzled class receptor 6	FALSE	Homo sapiens frizzled class receptor 6 (FZD6), transcript variant 1, mRNA [NM_003506]	8323	GO:0042813|GO:0001736|GO:0005515|GO:0017147|GO:0042472|GO:0005886|GO:0009986|GO:0004930|GO:0030168|GO:0001843|GO:0043433|GO:0016327|GO:0035880|GO:0033278|GO:0016324|GO:0007186|GO:0005887|GO:0016021|GO:0090090|GO:0001942|GO:0060071|GO:0031625|GO:0030659|GO:0035567	104344789	chr8	104344731	+	hs|8q22.3	NM_003506	chr8:104344731-104344789	NM_003506	Hs.591863
A_33_P3245539	2.59247	1.37433	2.59247	up	PNMA1	paraneoplastic Ma antigen 1	FALSE	Homo sapiens paraneoplastic Ma antigen 1 (PNMA1), mRNA [NM_006029]	9240	GO:0005515|GO:0002437|GO:0005737|GO:0043065|GO:0005730|GO:0005925	74179568	chr14	74179509	-	hs|14q24.3	NM_006029	chr14:74179568-74179509	NM_006029	Hs.194709
A_24_P82957	2.47337	1.30648	2.47337	up	RNF114	ring finger protein 114	FALSE	Homo sapiens ring finger protein 114 (RNF114), mRNA [NM_018683]	55905	GO:0005622|GO:0005737|GO:0016567|GO:0016874|GO:0008270|GO:0007275|GO:0005634|GO:0007283|GO:0030154	48569682	chr20	48569623	+	hs|20q13.13	NM_018683	chr20:48569623-48569682	NM_018683	Hs.144949
A_23_P135548	2.64526	1.40341	2.64526	up	DPYD	dihydropyrimidine dehydrogenase	FALSE	Homo sapiens dihydropyrimidine dehydrogenase (DPYD), transcript variant 1, mRNA [NM_000110]	1806	GO:0050661|GO:0017113|GO:0006214|GO:0051539|GO:0006210|GO:0050660|GO:0006212|GO:0006222|GO:0055086|GO:0044281|GO:0046872|GO:0042803|GO:0005829|GO:0019483|GO:0046135|GO:0005737|GO:0006145|GO:0004152|GO:0006206|GO:0055114|GO:0006208	97543959	chr1	97543900	-	hs|1p21.3	NM_000110	chr1:97543959-97543900	NM_000110	Hs.335034
A_24_P108863	3.83399	1.93884	3.83399	up	SCML1	sex comb on midleg-like 1 (Drosophila)	FALSE	Homo sapiens sex comb on midleg-like 1 (Drosophila) (SCML1), transcript variant 1, mRNA [NM_001037540]	6322	GO:0006355|GO:0003700|GO:0005634|GO:0009653|GO:0003677|GO:0006351	17772337	chrX	17772278	+	hs|Xp22.13	NM_001037540	chrX:17772278-17772337	NM_001037540	Hs.109655
A_23_P352870	3.72299	1.89646	3.72299	up	PVRL2	poliovirus receptor-related 2 (herpesvirus entry mediator B)	FALSE	Homo sapiens poliovirus receptor-related 2 (herpesvirus entry mediator B) (PVRL2), transcript variant alpha, mRNA [NM_002856]	5819	GO:0005515|GO:0001675|GO:0005886|GO:0007289|GO:0007286|GO:0033005|GO:0030382|GO:0042803|GO:0042802|GO:0060370|GO:0005915|GO:0005911|GO:0001618|GO:0007010|GO:0042271|GO:0050839|GO:0007156|GO:0002891|GO:0070062|GO:0009986|GO:0034329|GO:0019064|GO:0009615|GO:0015026|GO:0045216|GO:0032990|GO:0009566|GO:0051654|GO:0007165|GO:0044406|GO:0050776|GO:0045954|GO:0002860|GO:0016021|GO:0046814|GO:0005925|GO:…	45377685	chr19	45377626	+	hs|19q13.32	NM_002856	chr19:45377626-45377685	NM_002856	Hs.655455
A_33_P3423949	4.40872	2.14036	4.40872	up	CBX2	chromobox homolog 2	FALSE	Homo sapiens chromobox homolog 2 (CBX2), transcript variant 1, mRNA [NM_005189]	84733	GO:0035102|GO:0000792|GO:0005515|GO:0031519|GO:0000791|GO:0045137|GO:0005634|GO:0000122|GO:0035064|GO:0003677|GO:0006351|GO:0030154|GO:0003682|GO:0005654|GO:0016568	77761361	chr17	77761302	+	hs|17q25.3	NM_005189	chr17:77761302-77761361	NM_005189	Hs.368410
A_21_P0014948	2.29058	1.19571	2.29058	up			FALSE	glucosidase, beta, acid pseudogene 1 [Source:HGNC Symbol;Acc:HGNC:4178] [ENST00000566701]			155185555	chr1	155185496	-	hs|1q22	XR_431075	chr1:155185555-155185496	XR_431075	Hs.719930
A_33_P3330683	2.4189	1.27435	2.4189	up	XLOC_l2_008285		FALSE	BROAD Institute lincRNA (XLOC_l2_008285), lincRNA [TCONS_l2_00014931]			137087011	chr2	137086952	-	hs|2q22.1		chr2:137087011-137086952
A_23_P133236	3.03429	1.60136	3.03429	up	PCDHB14	protocadherin beta 14	FALSE	Homo sapiens protocadherin beta 14 (PCDHB14), mRNA [NM_018934]	56122	GO:0016339|GO:0005886|GO:0005509|GO:0007268|GO:0016021|GO:0007416|GO:0007156	140605587	chr5	140605528	+	hs|5q31.3	NM_018934	chr5:140605528-140605587	NM_018934	Hs.658497
A_21_P0000158	2.62299	1.39121	2.62299	up	XPNPEP3	X-prolyl aminopeptidase (aminopeptidase P) 3, putative	FALSE	Homo sapiens X-prolyl aminopeptidase (aminopeptidase P) 3, putative (XPNPEP3), transcript variant 2, mRNA [NM_001204827]	63929	GO:0005739|GO:0030145|GO:0016485|GO:0003094|GO:0004177|GO:0006508|GO:0008237|GO:0070062	41258771	chr22	41258712	+	hs|22q13.2	NM_001204827	chr22:41258712-41258771	NM_001204827	Hs.529163
A_23_P13183	2.04679	1.03336	2.04679	up	EXT2	exostosin glycosyltransferase 2	FALSE	Homo sapiens exostosin glycosyltransferase 2 (EXT2), transcript variant 1, mRNA [NM_000401]	2132	GO:0005783|GO:0015012|GO:0044281|GO:0015014|GO:0046872|GO:0030154|GO:0042803|GO:0033692|GO:0030203|GO:0070062|GO:0008375|GO:0050508|GO:0050509|GO:0005794|GO:0001707|GO:0046982|GO:0005975|GO:0016757|GO:0015020|GO:0006024|GO:0007165|GO:0001503|GO:0000139|GO:0016020|GO:0043541|GO:0009405|GO:0005789|GO:0006486|GO:0016021|GO:0042328	44266346	chr11	44266287	+	hs|11p11.2	NM_000401	chr11:44266287-44266346	NM_000401	Hs.368404
A_24_P278299	2.14036	1.09785	2.14036	up	ASB13	ankyrin repeat and SOCS box containing 13	FALSE	Homo sapiens ankyrin repeat and SOCS box containing 13 (ASB13), transcript variant 1, mRNA [NM_024701]	79754	GO:0035556|GO:0005515|GO:0016567	5681088	chr10	5681029	-	hs|10p15.1	NM_024701	chr10:5681088-5681029	NM_024701	Hs.445899
A_33_P3224745	2.04101	1.02928	2.04101	up	PLA2G15	phospholipase A2, group XV	FALSE	Homo sapiens phospholipase A2, group XV (PLA2G15), mRNA [NM_012320]	23659	GO:0005739|GO:0008374|GO:0005543|GO:0047499|GO:0006672|GO:0004622|GO:0046470|GO:0005764|GO:0070062|GO:0009062	68294959	chr16	68294900	+	hs|16q22.1	NM_012320	chr16:68294900-68294959	NM_012320	Hs.632199
A_33_P3331085	2.91828	1.54512	2.91828	up	SEC24A	SEC24 family member A	FALSE	Homo sapiens SEC24 family member A (SEC24A), transcript variant 1, mRNA [NM_021982]	10802	GO:2000189|GO:0002474|GO:0012507|GO:0048471|GO:0030127|GO:0045714|GO:0050714|GO:0048208|GO:0044281|GO:0006886|GO:0005829|GO:0006888|GO:0003674|GO:0019886|GO:0000139|GO:0005789|GO:0061024|GO:0008270|GO:0044267|GO:0018279|GO:0043687	134060775	chr5	134060716	+	hs|5q31.1	NM_021982	chr5:134060716-134060775	NM_021982	Hs.595540
A_23_P110791	2.10007	1.07043	2.10007	up	CSF1R	colony stimulating factor 1 receptor	FALSE	Homo sapiens colony stimulating factor 1 receptor (CSF1R), transcript variant 1, mRNA [NM_005211]	1436	GO:0008284|GO:0071902|GO:0005886|GO:0008283|GO:0061098|GO:0008360|GO:0019221|GO:0045124|GO:2000147|GO:0042803|GO:0031529|GO:2000249|GO:0046777|GO:0006954|GO:0030225|GO:0030224|GO:0070374|GO:0060603|GO:0090197|GO:0030097|GO:0038145|GO:0030335|GO:0036006|GO:0009986|GO:0048015|GO:0042517|GO:0019903|GO:0046488|GO:0030316|GO:0007275|GO:0018108|GO:0005524|GO:0045217|GO:0043235|GO:0007165|GO:0019955|GO:…	149432920	chr5	149432861	-	hs|5q32	NM_005211	chr5:149432920-149432861	NM_005211	Hs.586219
A_22_P00009369	6.49865	2.70014	6.49865	up	ESRG	embryonic stem cell related (non-protein coding)	FALSE	Homo sapiens embryonic stem cell related (non-protein coding) (ESRG), long non-coding RNA [NR_027122]	790952	GO:0005634	54666226	chr3	54666167	-	hs|3p14.3	NR_027122	chr3:54666226-54666167	NR_027122	Hs.720658
A_24_P192262	2.60308	1.38022	2.60308	up	RALA	v-ral simian leukemia viral oncogene homolog A (ras related)	FALSE	Homo sapiens v-ral simian leukemia viral oncogene homolog A (ras related) (RALA), mRNA [NM_005402]	5898	GO:0005515|GO:0005886|GO:0003924|GO:0051491|GO:0007265|GO:0030139|GO:0006887|GO:0032154|GO:0000910|GO:0006935|GO:0051665|GO:0017157|GO:0061024|GO:0016032|GO:0051117|GO:0030659|GO:0031625|GO:0070062|GO:0048011|GO:0009986|GO:0031532|GO:0030496|GO:0005525|GO:0006184|GO:0007165|GO:0017022|GO:0031755|GO:0019003|GO:0005925	39747458	chr7	39747399	+	hs|7p14.1	NM_005402	chr7:39747399-39747458	NM_005402	Hs.6906
A_24_P184388	2.11104	1.07795	2.11104	up	LRTOMT	leucine rich transmembrane and O-methyltransferase domain containing	FALSE	Homo sapiens leucine rich transmembrane and O-methyltransferase domain containing (LRTOMT), transcript variant 1, mRNA [NM_145309]	220074	GO:0005737|GO:0016206|GO:0007605|GO:0016021|GO:0005575|GO:0042135|GO:0042424|GO:0032259|GO:0060117	71807794	chr11	71807735	+	hs|11q13.4	NM_145309	chr11:71807735-71807794	NM_145309	Hs.317243
A_23_P92424	2.36552	1.24216	2.36552	up	UTP3	UTP3, small subunit (SSU) processome component, homolog (S. cerevisiae)	FALSE	Homo sapiens UTP3, small subunit (SSU) processome component, homolog (S. cerevisiae) (UTP3), mRNA [NM_020368]	57050	GO:0000462|GO:0007420|GO:0032040|GO:0005730|GO:0005634|GO:0016568	71555796	chr4	71555737	+	hs|4q13.3	NM_020368	chr4:71555737-71555796	NM_020368	Hs.322901
A_24_P187651	2.17327	1.11987	2.17327	up	CLN3	ceroid-lipofuscinosis, neuronal 3	FALSE	Homo sapiens ceroid-lipofuscinosis, neuronal 3 (CLN3), transcript variant 1, mRNA [NM_001042432]	1201	GO:0005802|GO:0005515|GO:0016242|GO:0005765|GO:0005764|GO:0030163|GO:0043524|GO:0007034|GO:0016485|GO:0047496|GO:0050885|GO:0008306|GO:0006684|GO:0005794|GO:0005795|GO:0043086|GO:0006898|GO:0006681|GO:0035235|GO:0035752|GO:0045121|GO:0051082|GO:0001508|GO:0007042|GO:0015809|GO:0007040|GO:0006678|GO:0043005|GO:0005886|GO:0005783|GO:0001575|GO:0006672|GO:0005634|GO:0030176|GO:0005739|GO:0005737|GO:…	28498844	chr16	28498785	-	hs|16p11.2	NM_001042432	chr16:28498844-28498785	NM_001042432	Hs.534667
A_33_P3358183	2.92756	1.5497	2.92756	up	PTGFR	prostaglandin F receptor (FP)	FALSE	Homo sapiens prostaglandin F receptor (FP) (PTGFR), transcript variant 1, mRNA [NM_000959]	5737	GO:0043066|GO:0008284|GO:0005737|GO:0035584|GO:0007567|GO:0007186|GO:0005886|GO:0005887|GO:0071799|GO:0032496|GO:0005576|GO:0004958	78959225	chr1	78959166	+	hs|1p31.1	NM_000959	chr1:78959166-78959225	NM_000959	Hs.654365
A_23_P203376	2.28006	1.18907	2.28006	up	MS4A6A	membrane-spanning 4-domains, subfamily A, member 6A	FALSE	Homo sapiens membrane-spanning 4-domains, subfamily A, member 6A (MS4A6A), transcript variant 1, mRNA [NM_152852]	64231	GO:0016021	59939426	chr11	59939367	-	hs|11q12.2	NM_152852	chr11:59939426-59939367	NM_152852	Hs.523702
A_33_P3227666	2.37722	1.24928	2.37722	up	AGGF1	angiogenic factor with G patch and FHA domains 1	FALSE	Homo sapiens angiogenic factor with G patch and FHA domains 1 (AGGF1), mRNA [NM_018046]	55109	GO:0005515|GO:0006396|GO:0048471|GO:0005737|GO:0001938|GO:0005576|GO:0001525|GO:0007155|GO:0003676|GO:0001570|GO:0045766	76360925	chr5	76360866	+	hs|5q13.3	NM_018046	chr5:76360866-76360925	NM_018046	Hs.634849
A_23_P131771	2.96557	1.56831	2.96557	up	TPD52L2	tumor protein D52-like 2	FALSE	Homo sapiens tumor protein D52-like 2 (TPD52L2), transcript variant 1, mRNA [NM_199360]	7165	GO:0005515|GO:0048471|GO:0005737|GO:0046982|GO:0042127|GO:0042803	62521981	chr20	62521922	+	hs|20q13.33	NM_199360	chr20:62521922-62521981	NM_199360	Hs.473296
A_23_P157569	2.37454	1.24765	2.37454	up	ADHFE1	alcohol dehydrogenase, iron containing, 1	FALSE	Homo sapiens alcohol dehydrogenase, iron containing, 1 (ADHFE1), mRNA [NM_144650]	137872	GO:0005739|GO:0047988|GO:0005759|GO:0006103|GO:0044281|GO:0046872|GO:0044237|GO:0015993|GO:0055114	67380715	chr8	67380656	+	hs|8q13.1	NM_144650	chr8:67380656-67380715	NM_144650	Hs.720023
A_21_P0014177	3.18084	1.66941	3.18084	up	LOC101926963	uncharacterized LOC101926963	FALSE	Homo sapiens uncharacterized LOC101926963 (LOC101926963), transcript variant 1, long non-coding RNA [NR_110054]	101926963		648139	chr7	648080	+	hs|7p22.3	NR_110054	chr7:648080-648139	NR_110054
A_33_P3251430	2.78289	1.47659	2.78289	up	NRIP1	nuclear receptor interacting protein 1	FALSE	Homo sapiens nuclear receptor interacting protein 1 (NRIP1), mRNA [NM_003489]	8204	GO:0005515|GO:0030054|GO:0042826|GO:0019915|GO:0035257|GO:0005634|GO:0035259|GO:0050681|GO:0046965|GO:0045944|GO:0001046|GO:0003714|GO:0003713|GO:0030331|GO:0005730|GO:0001543|GO:0000122|GO:0006351|GO:0032922|GO:0000118|GO:0016607|GO:0007623|GO:0005654|GO:0045893|GO:0030521	16337033	chr21	16336974	-	hs|21q11.2	NM_003489	chr21:16337033-16336974	NM_003489	Hs.155017
A_21_P0001238	2.1404	1.09788	2.1404	up	lnc-EGLN1-1	lnc-EGLN1-1:6	FALSE	LNCipedia lincRNA (lnc-EGLN1-1), lincRNA [lnc-EGLN1-1:6]			231663140	chr1	231658381	-	hs|1q42.2		chr1:231663140-231658381
A_23_P73457	2.32771	1.21891	2.32771	up	RUFY1	RUN and FYVE domain containing 1	FALSE	Homo sapiens RUN and FYVE domain containing 1 (RUFY1), transcript variant 1, mRNA [NM_025158]	80230	GO:0005515|GO:0005737|GO:0030100|GO:0031901|GO:0008565|GO:0008270|GO:0005634|GO:0015031|GO:0043231|GO:0008289|GO:0006897	179036923	chr5	179036864	+	hs|5q35.3	NM_025158	chr5:179036864-179036923	NM_025158	Hs.306769
A_33_P3300267	3.38636	1.75973	3.38636	up	VIT	vitrin	FALSE	Homo sapiens vitrin (VIT), transcript variant 1, mRNA [NM_053276]	5212	GO:0030198|GO:0010811|GO:0005539|GO:0005614	37041576	chr2	37041517	+	hs|2p22.2	NM_053276	chr2:37041517-37041576	NM_053276	Hs.137415
A_33_P3393684	2.12049	1.0844	2.12049	up	VSIG8	V-set and immunoglobulin domain containing 8	FALSE	Homo sapiens V-set and immunoglobulin domain containing 8 (VSIG8), mRNA [NM_001013661]	391123	GO:0005622|GO:0016021	159824170	chr1	159824111	-	hs|1q23.2	NM_001013661	chr1:159824170-159824111	NM_001013661	Hs.647718
A_23_P171143	3.44266	1.78353	3.44266	up	TSPAN6	tetraspanin 6	FALSE	Homo sapiens tetraspanin 6 (TSPAN6), transcript variant 1, mRNA [NM_003270]	7105	GO:0005515|GO:0007165|GO:0039532|GO:0016021|GO:0004871|GO:0043123|GO:0070062	99884342	chrX	99884283	-	hs|Xq22.1	NM_003270	chrX:99884342-99884283	NM_003270	Hs.43233
A_21_P0013016	2.15812	1.10977	2.15812	up	XLOC_l2_012415		FALSE	BROAD Institute lincRNA (XLOC_l2_012415), lincRNA [TCONS_l2_00024057]			16163923	chr6	16163864	+	hs|6p22.3		chr6:16163864-16163923
A_22_P00023005	2.81764	1.49449	2.81764	up	lnc-IL5RA-6	lnc-IL5RA-6:1	FALSE	UI-E-EJ0-ahh-e-17-0-UI.r1 UI-E-EJ0 Homo sapiens cDNA clone UI-E-EJ0-ahh-e-17-0-UI 5', mRNA sequence [BM712886]			238349	chr3	238290	-	hs|3p26.3	BM712886	chr3:238349-238290		Hs.737185
A_33_P3279515	2.00038	1.00028	2.00038	up	LOC729451	uncharacterized LOC729451	FALSE	PREDICTED: Homo sapiens uncharacterized LOC729451 (LOC729451), misc_RNA [XR_424503]	729451		55152515	chr14	55152456	-	hs|14q22.2	XR_424503	chr14:55152515-55152456	XR_424503	Hs.647554
A_24_P303145	3.07112	1.61877	3.07112	up	ANKH	ANKH inorganic pyrophosphate transport regulator	FALSE	Homo sapiens ANKH inorganic pyrophosphate transport regulator (ANKH), mRNA [NM_054027]	56172	GO:0030500|GO:0001501|GO:0005886|GO:0005887|GO:0019867|GO:0035435|GO:0015114|GO:0007626|GO:0005315|GO:0016021|GO:0030504|GO:0030505	14705088	chr5	14705029	-	hs|5p15.2	NM_054027	chr5:14705088-14705029	NM_054027	Hs.156727
A_23_P55174	2.307	1.20601	2.307	up	G6PC3	glucose 6 phosphatase, catalytic, 3	FALSE	Homo sapiens glucose 6 phosphatase, catalytic, 3 (G6PC3), transcript variant 1, mRNA [NM_138387]	92579	GO:0005975|GO:0006094|GO:0015760|GO:0044281|GO:0055085|GO:0008645|GO:0015758|GO:0016020|GO:0016311|GO:0004346|GO:0005789|GO:0009405|GO:0016021|GO:0051156	42152071	chr17	42151599	+	hs|17q21.31	NM_138387	chr17:42151599-42152071	NM_138387	Hs.294005
A_23_P369994	4.38746	2.13339	4.38746	up	DCLK1	doublecortin-like kinase 1	FALSE	Homo sapiens doublecortin-like kinase 1 (DCLK1), transcript variant 1, mRNA [NM_004734]	9201	GO:0048675|GO:0021952|GO:0007417|GO:0009615|GO:0005524|GO:0007399|GO:0035556|GO:0048813|GO:0004672|GO:0004674|GO:0005887|GO:0016197|GO:0006468|GO:0005057|GO:0030900|GO:0001764	36345567	chr13	36345508	-	hs|13q13.3	NM_004734	chr13:36345567-36345508	NM_004734	Hs.507755
A_23_P210886	3.39876	1.76501	3.39876	up	BCL2L1	BCL2-like 1	FALSE	Homo sapiens BCL2-like 1 (BCL2L1), transcript variant 1, mRNA [NM_138578]	598	GO:0005515|GO:0019050|GO:0030054|GO:0097284|GO:0007283|GO:2000811|GO:0051402|GO:0007281|GO:0042803|GO:0042802|GO:0000910|GO:0043524|GO:0008637|GO:0005759|GO:0097136|GO:0030672|GO:0005813|GO:0031965|GO:0019901|GO:0046982|GO:0071312|GO:2001244|GO:2001243|GO:0001701|GO:0006897|GO:0009566|GO:0070584|GO:0045087|GO:1900118|GO:0010507|GO:0071839|GO:0040007|GO:0008284|GO:0007093|GO:0008283|GO:0005743|GO:…	30253383	chr20	30253324	-	hs|20q11.21	NM_138578	chr20:30253383-30253324	NM_138578	Hs.516966
A_23_P103414	2.35094	1.23324	2.35094	up	YTHDF2	YTH N(6)-methyladenosine RNA binding protein 2	FALSE	Homo sapiens YTH N(6)-methyladenosine RNA binding protein 2 (YTHDF2), transcript variant 1, mRNA [NM_016258]	51441	GO:0043488|GO:0000932|GO:0006959	29096042	chr1	29095983	+	hs|1p35.3	NM_016258	chr1:29095983-29096042	NM_016258	Hs.532286
A_22_P00013536	2.29774	1.20021	2.29774	up	lnc-RP11-422N16.3.1-1	lnc-RP11-422N16.3.1-1:1	FALSE	LNCipedia lincRNA (lnc-RP11-422N16.3.1-1), lincRNA [lnc-RP11-422N16.3.1-1:1]			110987010	chr8	110986951	+	hs|8q23.2		chr8:110986951-110987010
A_33_P3333337	2.88159	1.52686	2.88159	up	LRCH1	leucine-rich repeats and calponin homology (CH) domain containing 1	FALSE	Homo sapiens leucine-rich repeats and calponin homology (CH) domain containing 1 (LRCH1), transcript variant 3, mRNA [NM_001164213]	23143		47324785	chr13	47324726	+	hs|13q14.2	NM_001164213	chr13:47324726-47324785	NM_001164213	Hs.507971
A_21_P0002492	2.1927	1.13271	2.1927	up	FLJ42351	uncharacterized LOC400999	FALSE	uncharacterized LOC400999 [Source:EntrezGene;Acc:400999] [ENST00000457336]	400999		113402808	chr2	113402749	-	hs|2q13	XM_005275926	chr2:113402808-113402749	XM_005275926	Hs.585221
A_23_P202448	3.56672	1.8346	3.56672	up	CXCL12	chemokine (C-X-C motif) ligand 12	FALSE	Homo sapiens chemokine (C-X-C motif) ligand 12 (CXCL12), transcript variant 1, mRNA [NM_199168]	6387	GO:0008344|GO:0009408|GO:0008015|GO:0031100|GO:0048842|GO:0043434|GO:0090280|GO:0005615|GO:0007281|GO:0022029|GO:0006955|GO:0042098|GO:0006935|GO:0007155|GO:0070062|GO:0009314|GO:0001666|GO:0008009|GO:2000406|GO:0001569|GO:0008354|GO:0070098|GO:0001667|GO:0006874|GO:0005102|GO:0042379|GO:0005576|GO:0045236|GO:0009615|GO:0045785|GO:0009612|GO:0050930|GO:0007165|GO:0008045|GO:0001938|GO:0007186|GO:…	44872947	chr10	44872888	-	hs|10q11.21	NM_199168	chr10:44872947-44872888	NM_199168	Hs.522891
A_23_P111995	5.10948	2.35318	5.10948	up	LOXL2	lysyl oxidase-like 2	FALSE	Homo sapiens lysyl oxidase-like 2 (LOXL2), mRNA [NM_002318]	4017	GO:0005515|GO:0005634|GO:0002040|GO:0035064|GO:0001837|GO:0005615|GO:0070492|GO:0030199|GO:0032332|GO:0007155|GO:0018277|GO:0005044|GO:0001666|GO:0005507|GO:0005694|GO:0004720|GO:0003714|GO:0007568|GO:0009055|GO:0016570|GO:0006351|GO:0006898|GO:0005604|GO:0016020|GO:0043542|GO:0003682|GO:0001935|GO:0005654|GO:0046688|GO:0045892|GO:0006464|GO:0055114	23154845	chr8	23154786	-	hs|8p21.3	NM_002318	chr8:23154845-23154786	NM_002318	Hs.626637
A_23_P40453	2.87746	1.52479	2.87746	up	CBR3	carbonyl reductase 3	FALSE	Homo sapiens carbonyl reductase 3 (CBR3), mRNA [NM_001236]	874	GO:0005737|GO:0004090|GO:0050890|GO:0005654|GO:0070402|GO:0042376|GO:0005615|GO:0055114|GO:0005829|GO:0000253	37518438	chr21	37518379	+	hs|21q22.12	NM_001236	chr21:37518379-37518438	NM_001236	Hs.154510
A_24_P156501	2.59547	1.37599	2.59547	up	EBF1	early B-cell factor 1	FALSE	Homo sapiens early B-cell factor 1 (EBF1), transcript variant 2, mRNA [NM_024007]	1879	GO:0003700|GO:0046983|GO:0070742|GO:0007275|GO:0005634|GO:0045893|GO:0003677|GO:0046872|GO:0006351	158126074	chr5	158126015	-	hs|5q33.3	NM_024007	chr5:158126074-158126015	NM_024007	Hs.573143
A_22_P00017726	2.05249	1.03738	2.05249	up	KIZ	kizuna centrosomal protein	FALSE	Homo sapiens kizuna centrosomal protein (KIZ), transcript variant 1, mRNA [NM_018474]	55857	GO:0005515|GO:0005813|GO:0005737|GO:0019901|GO:0042995|GO:0007051	21227242	chr20	21227183	+	hs|20p11.23	NM_018474	chr20:21227183-21227242	NM_018474	Hs.187635
A_24_P943472	3.3981	1.76473	3.3981	up	NR1D2	nuclear receptor subfamily 1, group D, member 2	FALSE	Homo sapiens nuclear receptor subfamily 1, group D, member 2 (NR1D2), transcript variant 1, mRNA [NM_005126]	9975	GO:0005515|GO:0010467|GO:0006355|GO:0006367|GO:0055088|GO:0050727|GO:0003707|GO:0005634|GO:0019216|GO:0043401|GO:0042752|GO:0005654|GO:0008270|GO:2001014|GO:0048511|GO:0001046|GO:0004879|GO:0045893|GO:2000505|GO:0045892|GO:0030522	24021519	chr3	24021460	+	hs|3p24.2	NM_005126	chr3:24021460-24021519	NM_005126	Hs.37288
A_24_P876522	2.00315	1.00227	2.00315	up	GPX8	glutathione peroxidase 8 (putative)	FALSE	Homo sapiens glutathione peroxidase 8 (putative) (GPX8), mRNA [NM_001008397]	493869	GO:0004602|GO:0004601|GO:0005788|GO:0016021|GO:0000302|GO:0055114	54463111	chr5	54463052	+	hs|5q11.2	NM_001008397	chr5:54463052-54463111	NM_001008397	Hs.289044
A_33_P3249434	2.41956	1.27474	2.41956	up	PLAA	phospholipase A2-activating protein	FALSE	Homo sapiens phospholipase A2-activating protein (PLAA), mRNA [NM_001031689]	9373	GO:0016005|GO:0005515|GO:0007165|GO:0006954|GO:0043085|GO:0006644|GO:0070062	26903542	chr9	26903483	-	hs|9p21.2	NM_001031689	chr9:26903542-26903483	NM_001031689	Hs.27182
A_24_P339071	2.07616	1.05392	2.07616	up	CDR2	cerebellar degeneration-related protein 2, 62kDa	FALSE	Homo sapiens cerebellar degeneration-related protein 2, 62kDa (CDR2), mRNA [NM_001802]	1039	GO:0005515|GO:0003674|GO:0005737	22358232	chr16	22358173	-	hs|16p12.2	NM_001802	chr16:22358232-22358173	NM_001802	Hs.513430
A_24_P107859	3.76266	1.91175	3.76266	up	SPRED1	sprouty-related, EVH1 domain containing 1	FALSE	Homo sapiens sprouty-related, EVH1 domain containing 1 (SPRED1), mRNA [NM_152594]	161742	GO:0005515|GO:0019901|GO:0019902|GO:0007275|GO:0090311|GO:0010801|GO:0030291|GO:0000188|GO:0005737|GO:0005901|GO:0010923|GO:0043517|GO:0005654|GO:0005173	38645819	chr15	38645760	+	hs|15q14	NM_152594	chr15:38645760-38645819	NM_152594	Hs.525781
A_23_P87323	2.50139	1.32273	2.50139	up	COMMD9	COMM domain containing 9	FALSE	Homo sapiens COMM domain containing 9 (COMMD9), transcript variant 1, mRNA [NM_014186]	29099	GO:0005515	36295823	chr11	36295764	-	hs|11p13	NM_014186	chr11:36295823-36295764	NM_014186	Hs.279836
A_23_P3775	2.18323	1.12647	2.18323	up	OGFOD1	2-oxoglutarate and iron-dependent oxygenase domain containing 1	FALSE	Homo sapiens 2-oxoglutarate and iron-dependent oxygenase domain containing 1 (OGFOD1), mRNA [NM_018233]	55239	GO:0031543|GO:0031418|GO:0031544|GO:0005506|GO:0008283|GO:0010494|GO:0005634|GO:0006449|GO:0019511|GO:0005737|GO:0034063|GO:0018126|GO:0055114	56510271	chr16	56510212	+	hs|16q12.2	NM_018233	chr16:56510212-56510271	NM_018233	Hs.231883
A_23_P215883	2.1553	1.10789	2.1553	up	NCALD	neurocalcin delta	FALSE	Homo sapiens neurocalcin delta (NCALD), transcript variant 7, mRNA [NM_001040630]	83988	GO:0019722|GO:0043014|GO:0005509|GO:0007268|GO:0003779|GO:0005829|GO:0003073|GO:0005622|GO:0015631|GO:0030276|GO:0030130|GO:0016192|GO:0070062	102699720	chr8	102699661	-	hs|8q22.3	NM_001040630	chr8:102699720-102699661	NM_001040630	Hs.492427
A_23_P32253	4.70211	2.23331	4.70211	up	NFIL3	nuclear factor, interleukin 3 regulated	FALSE	Homo sapiens nuclear factor, interleukin 3 regulated (NFIL3), transcript variant 3, mRNA [NM_005384]	4783	GO:0000977|GO:0003700|GO:0006366|GO:0003714|GO:0005634|GO:0000122|GO:0000979|GO:0003677|GO:0010628|GO:0001078|GO:0006955|GO:0007623|GO:0071353	94171459	chr9	94171400	-	hs|9q22.31	NM_005384	chr9:94171459-94171400	NM_005384	Hs.79334
A_33_P3260575	2.322	1.21537	2.322	up	CERCAM	cerebral endothelial cell adhesion molecule	FALSE	Homo sapiens cerebral endothelial cell adhesion molecule (CERCAM), transcript variant 1, mRNA [NM_016174]	51148	GO:0005886|GO:0007159|GO:0006928|GO:0005788|GO:0007155	131199623	chr9	131199564	+	hs|9q34.11	NM_016174	chr9:131199564-131199623	NM_016174	Hs.495230
A_33_P3407424	2.79763	1.48421	2.79763	up	CDC42EP1	CDC42 effector protein (Rho GTPase binding) 1	FALSE	Homo sapiens CDC42 effector protein (Rho GTPase binding) 1 (CDC42EP1), mRNA [NM_152243]	11135	GO:0005515|GO:0005794|GO:0005886|GO:0008360|GO:0007266|GO:0015629|GO:0005100|GO:0005737|GO:0030838|GO:0032321|GO:0031274|GO:0017049|GO:0005925	37965411	chr22	37965352	+	hs|22q13.1	NM_152243	chr22:37965352-37965411	NM_152243	Hs.225356
A_33_P3832857	2.56107	1.35675	2.56107	up	HAUS2	HAUS augmin-like complex, subunit 2	FALSE	Homo sapiens HAUS augmin-like complex, subunit 2 (HAUS2), transcript variant 1, mRNA [NM_018097]	55142	GO:0005813|GO:0005794|GO:0006996|GO:0005874|GO:0005819|GO:0051225|GO:0005829|GO:0051297|GO:0003674|GO:0005737|GO:0007067|GO:0000086|GO:0070652|GO:0005654|GO:0000278|GO:0051301	42859183	chr15	42859124	+	hs|15q15.2	NM_018097	chr15:42859124-42859183	NM_018097	Hs.14347
A_24_P390833	2.57142	1.36257	2.57142	up	MPPE1	metallophosphoesterase 1	FALSE	Homo sapiens metallophosphoesterase 1 (MPPE1), transcript variant 1, mRNA [NM_023075]	65258	GO:0006888|GO:0005801|GO:0008081|GO:0005793|GO:0034235|GO:0030145|GO:0005794|GO:0033116|GO:0005654|GO:0016021|GO:0070971|GO:0006506	11888697	chr18	11886995	-	hs|18p11.21	NM_023075	chr18:11888697-11886995	NM_023075	Hs.712666
A_23_P151778	3.35247	1.74522	3.35247	up	CMA1	chymase 1, mast cell	FALSE	Homo sapiens chymase 1, mast cell (CMA1), mRNA [NM_001836]	1215	GO:0042277|GO:0002003|GO:0004252|GO:0050727|GO:0005576|GO:0005615|GO:0045766|GO:0050720|GO:0005622|GO:0031012|GO:0022617|GO:0016485|GO:0030198|GO:0006508|GO:0008236|GO:0030901|GO:0071333|GO:0044267	24975737	chr14	24975678	-	hs|14q12	NM_001836	chr14:24975737-24975678	NM_001836	Hs.135626
A_22_P00010261	3.13065	1.64646	3.13065	up	lnc-MTHFD2L-1	lnc-MTHFD2L-1:1	FALSE	Synthetic construct Homo sapiens gateway clone IMAGE:100018489 3' read CXCL2 mRNA. [CU677428]			74964378	chr4	74964319	+	hs|4q13.3	CU677428	chr4:74964319-74964378
A_23_P140301	2.17431	1.12056	2.17431	up	PSMA3	proteasome (prosome, macropain) subunit, alpha type, 3	FALSE	Homo sapiens proteasome (prosome, macropain) subunit, alpha type, 3 (PSMA3), transcript variant 1, mRNA [NM_002788]	5684	GO:0005515|GO:0002474|GO:0010467|GO:0090263|GO:0005634|GO:0044281|GO:0031145|GO:0005829|GO:0004298|GO:0034641|GO:0005737|GO:0000082|GO:0016032|GO:0090090|GO:0070062|GO:0006977|GO:0000209|GO:0005839|GO:0000502|GO:0043066|GO:0006521|GO:0051437|GO:0042590|GO:0006915|GO:0042981|GO:0051436|GO:0051439|GO:0019773|GO:0002479|GO:0005654|GO:0000278	58737682	chr14	58737175	+	hs|14q23.1	NM_002788	chr14:58737175-58737682	NM_002788	Hs.558799
A_22_P00004022	2.29507	1.19854	2.29507	up	LOC100506497	uncharacterized LOC100506497	FALSE	Homo sapiens uncharacterized LOC100506497 (LOC100506497), long non-coding RNA [NR_038965]	100506497		29049809	chr7	29049750	+	hs|7p14.3	NR_038965	chr7:29049750-29049809	NR_038965	Hs.586328
A_24_P210637	2.33676	1.22451	2.33676	up	CHST14	carbohydrate (N-acetylgalactosamine 4-0) sulfotransferase 14	FALSE	Homo sapiens carbohydrate (N-acetylgalactosamine 4-0) sulfotransferase 14 (CHST14), mRNA [NM_130468]	113189	GO:0005975|GO:0001537|GO:0044281|GO:0050655|GO:0016051|GO:0030208|GO:0000139|GO:0042301|GO:0009405|GO:0016021|GO:0030204|GO:0030203|GO:0070062	40764331	chr15	40764272	+	hs|15q15.1	NM_130468	chr15:40764272-40764331	NM_130468	Hs.442449
A_23_P337729	2.08343	1.05896	2.08343	up	TMEM180	transmembrane protein 180	FALSE	Homo sapiens transmembrane protein 180 (TMEM180), mRNA [NM_024789]	79847	GO:0016021	104236718	chr10	104236659	+	hs|10q24.32	NM_024789	chr10:104236659-104236718	NM_024789	Hs.309069
A_23_P61180	3.91201	1.96791	3.91201	up	PLCXD1	phosphatidylinositol-specific phospholipase C, X domain containing 1	FALSE	Homo sapiens phosphatidylinositol-specific phospholipase C, X domain containing 1 (PLCXD1), transcript variant 1, mRNA [NM_018390]	55344	GO:0006629|GO:0008081	219786	chrX	219727	+	hs|Xp22.33	NM_018390	chrX:219727-219786	NM_018390	Hs.522568
A_32_P58937	2.86868	1.52038	2.86868	up	MBTD1	mbt domain containing 1	FALSE	Homo sapiens mbt domain containing 1 (MBTD1), mRNA [NM_017643]	54799	GO:0006355|GO:0048706|GO:0008270|GO:0005634|GO:0006351|GO:0016568	49255399	chr17	49255340	-	hs|17q21.33	NM_017643	chr17:49255399-49255340	NM_017643	Hs.656803
A_33_P3390057	2.42442	1.27764	2.42442	up	TM4SF1	transmembrane 4 L six family member 1	FALSE	Homo sapiens transmembrane 4 L six family member 1 (TM4SF1), mRNA [NM_014220]	4071	GO:0008150|GO:0003674|GO:0005887	149086869	chr3	149086810	-	hs|3q25.1	NM_014220	chr3:149086869-149086810	NM_014220	Hs.351316
A_24_P683011	2.72194	1.44463	2.72194	up	C8orf88	chromosome 8 open reading frame 88	FALSE	Homo sapiens chromosome 8 open reading frame 88 (C8orf88), mRNA [NM_001190972]	100127983		91971239	chr8	91971180	-	hs|8q21.3	NM_001190972	chr8:91971239-91971180	NM_001190972	Hs.733266
A_24_P941167	3.56793	1.83509	3.56793	up	APOL6	apolipoprotein L, 6	FALSE	Homo sapiens apolipoprotein L, 6 (APOL6), mRNA [NM_030641]	80830	GO:0005737|GO:0006869|GO:0042157|GO:0005576|GO:0008289	36057177	chr22	36057118	+	hs|22q12.3	NM_030641	chr22:36057118-36057177	NM_030641	Hs.257352
A_33_P3351101	4.80506	2.26455	4.80506	up	TYSND1	trypsin domain containing 1	FALSE	Homo sapiens trypsin domain containing 1 (TYSND1), transcript variant 1, mRNA [NM_173555]	219743	GO:0031998|GO:0016020|GO:0004252|GO:0016485|GO:0006508|GO:0051260|GO:0002020|GO:0042802|GO:0005777	71898108	chr10	71898049	-	hs|10q22.1	NM_173555	chr10:71898108-71898049	NM_173555	Hs.533655
A_24_P122137	4.62409	2.20917	4.62409	up	LIF	leukemia inhibitory factor	FALSE	Homo sapiens leukemia inhibitory factor (LIF), transcript variant 1, mRNA [NM_002309]	3976	GO:0060426|GO:0008284|GO:0008285|GO:0042503|GO:0006366|GO:0050731|GO:0033141|GO:1900182|GO:0005615|GO:0046888|GO:0048644|GO:0046697|GO:0006955|GO:0005737|GO:0033138|GO:0048666|GO:0045944|GO:0072307|GO:0070373|GO:0005146|GO:0048286|GO:0007566|GO:0060708|GO:0042517|GO:0060707|GO:0005102|GO:0042511|GO:0007275|GO:0045651|GO:0005125|GO:0072108|GO:0048861|GO:0048711|GO:0001974|GO:0019827|GO:0060463|GO:…	30636772	chr22	30636713	-	hs|22q12.2	NM_002309	chr22:30636772-30636713	NM_002309	Hs.2250
A_33_P3275751	2.51621	1.33125	2.51621	up	SEC14L1	SEC14-like 1 (S. cerevisiae)	FALSE	Homo sapiens SEC14-like 1 (S. cerevisiae) (SEC14L1), transcript variant 7, mRNA [NM_001204410]	6397	GO:0005794|GO:0016020|GO:0006810|GO:0016021	75213008	chr17	75212949	+	hs|17q25.2	NM_001204410	chr17:75212949-75213008	NM_001204410	Hs.464184
A_23_P23947	2.39985	1.26294	2.39985	up	MAP3K8	mitogen-activated protein kinase kinase kinase 8	FALSE	Homo sapiens mitogen-activated protein kinase kinase kinase 8 (MAP3K8), transcript variant 1, mRNA [NM_005204]	1326	GO:0023014|GO:0005515|GO:0000287|GO:0031295|GO:0006915|GO:0005524|GO:0005829|GO:0035556|GO:0000186|GO:0005737|GO:0007049|GO:0004702|GO:0000165|GO:0004674|GO:0045595|GO:0006468|GO:0004709	30750039	chr10	30749980	+	hs|10p11.23	NM_005204	chr10:30749980-30750039	NM_005204	Hs.432453
A_33_P3373375	2.34158	1.22748	2.34158	up	CD81	CD81 molecule	FALSE	Homo sapiens CD81 molecule (CD81), transcript variant 1, mRNA [NM_004356]	975	GO:0001772|GO:0005515|GO:0008284|GO:0005886|GO:0006661|GO:0008283|GO:0030890|GO:0046488|GO:2000145|GO:0050731|GO:0046718|GO:0031982|GO:0000187|GO:0008104|GO:0016020|GO:0005887|GO:0050776|GO:0023026|GO:0043128|GO:0046813|GO:0005925|GO:0070062	2418096	chr11	2418037	+	hs|11p15.5	NM_004356	chr11:2418037-2418096	NM_004356	Hs.54457
A_24_P175059	2.4735	1.30655	2.4735	up	ATG5	autophagy related 5	FALSE	Homo sapiens autophagy related 5 (ATG5), transcript variant 1, mRNA [NM_004849]	9474	GO:0005515|GO:0060047|GO:0051279|GO:0009620|GO:0070257|GO:0005737|GO:2000619|GO:0042311|GO:0002739|GO:0044233|GO:0031397|GO:0000045|GO:0032480|GO:0006995|GO:0006501|GO:0043066|GO:0005776|GO:0000422|GO:0005930|GO:0042493|GO:0006914|GO:0006915|GO:0034045|GO:0016020|GO:0048840|GO:0001974|GO:0019776|GO:0045087|GO:0055015|GO:0034274|GO:2000377|GO:0043687	106632811	chr6	106632752	-	hs|6q21	NM_004849	chr6:106632811-106632752	NM_004849	Hs.486063
A_23_P137016	2.15884	1.11026	2.15884	up	SAT1	spermidine/spermine N1-acetyltransferase 1	FALSE	Homo sapiens spermidine/spermine N1-acetyltransferase 1 (SAT1), transcript variant 1, mRNA [NM_002970]	6303	GO:0005515|GO:0001525|GO:0032918|GO:0044281|GO:0005829|GO:0005622|GO:0034641|GO:0006596|GO:0019809|GO:0042127|GO:0006595|GO:0004145|GO:0009447	23804114	chrX	23804055	+	hs|Xp22.11	NM_002970	chrX:23804055-23804114	NM_002970	Hs.28491
A_23_P254165	3.16296	1.66127	3.16296	up	RAI2	retinoic acid induced 2	FALSE	Homo sapiens retinoic acid induced 2 (RAI2), transcript variant 2, mRNA [NM_021785]	10742	GO:0005515|GO:0003674|GO:0009790|GO:0005575	17818437	chrX	17818378	-	hs|Xp22.13	NM_021785	chrX:17818437-17818378	NM_021785	Hs.446680
A_32_P59486	2.14632	1.10187	2.14632	up	SDHD	succinate dehydrogenase complex, subunit D, integral membrane protein	FALSE	Homo sapiens succinate dehydrogenase complex, subunit D, integral membrane protein (SDHD), transcript variant 1, mRNA [NM_003002]	6392	GO:0048039|GO:0006099|GO:0005743|GO:0009055|GO:0005740|GO:0044281|GO:0046872|GO:0005739|GO:0022904|GO:0005749|GO:0000104|GO:0016021|GO:0044237|GO:0020037	111965817	chr11	111965758	+	hs|11q23.1	NM_003002	chr11:111965758-111965817	NM_003002	Hs.744039
A_23_P212089	4.16773	2.05926	4.16773	up	NFKBIZ	nuclear factor of kappa light polypeptide gene enhancer in B-cells inhibitor, zeta	FALSE	Homo sapiens nuclear factor of kappa light polypeptide gene enhancer in B-cells inhibitor, zeta (NFKBIZ), transcript variant 1, mRNA [NM_031419]	64332	GO:0003712|GO:0006954|GO:0006357|GO:0005634|GO:0006351	101578963	chr3	101578904	+	hs|3q12.3	NM_031419	chr3:101578904-101578963	NM_031419	Hs.319171
A_32_P827528	3.03228	1.60041	3.03228	up	S1PR2	sphingosine-1-phosphate receptor 2	FALSE	Homo sapiens sphingosine-1-phosphate receptor 2 (S1PR2), mRNA [NM_004230]	9294	GO:0000187|GO:0008284|GO:0090394|GO:0005178|GO:0001664|GO:0007186|GO:0005886|GO:0004930|GO:0003376|GO:0016021|GO:0038036|GO:0008289	10332293	chr19	10332234	-	hs|19p13.2	NM_004230	chr19:10332293-10332234	NM_004230	Hs.655405
A_33_P3403132	2.87435	1.52323	2.87435	up	NR2F6	nuclear receptor subfamily 2, group F, member 6	FALSE	Homo sapiens nuclear receptor subfamily 2, group F, member 6 (NR2F6), mRNA [NM_005234]	2063	GO:0005515|GO:0010467|GO:0003700|GO:0006367|GO:0003707|GO:0005634|GO:0000122|GO:0001227|GO:0003677|GO:0043565|GO:0007165|GO:0048666|GO:0043401|GO:0008270|GO:0000980|GO:0005654|GO:0004879|GO:0004887|GO:0050965|GO:0043153|GO:0030522	17342753	chr19	17342694	-	hs|19p13.11	NM_005234	chr19:17342753-17342694	NM_005234	Hs.466148
A_23_P102731	3.27792	1.71278	3.27792	up	SMOX	spermine oxidase	FALSE	Homo sapiens spermine oxidase (SMOX), transcript variant 1, mRNA [NM_175839]	54498	GO:0052901|GO:0006805|GO:0005634|GO:0044281|GO:0005829|GO:0046592|GO:0034641|GO:0005737|GO:0006598|GO:0006596|GO:0006595|GO:0052895|GO:0046208|GO:0052894|GO:0055114	4168359	chr20	4168300	+	hs|20p13	NM_175839	chr20:4168300-4168359	NM_175839	Hs.433337
A_23_P112135	2.00325	1.00234	2.00325	up	TRAM1	translocation associated membrane protein 1	FALSE	Homo sapiens translocation associated membrane protein 1 (TRAM1), mRNA [NM_014294]	23471	GO:0005515|GO:0010467|GO:0005783|GO:0006614|GO:0006613|GO:0005789|GO:0016032|GO:0004872|GO:0016021|GO:0044267|GO:0006412	71485966	chr8	71485907	-	hs|8q13.3	NM_014294	chr8:71485966-71485907	NM_014294	Hs.491988
A_23_P142708	2.07442	1.05271	2.07442	up	LMAN2L	lectin, mannose-binding 2-like	FALSE	Homo sapiens lectin, mannose-binding 2-like (LMAN2L), transcript variant 2, mRNA [NM_030805]	81562	GO:0006888|GO:0030134|GO:0005794|GO:0000139|GO:0006457|GO:0005789|GO:0016021|GO:0015031|GO:0005537|GO:0046872	97372119	chr2	97372060	-	hs|2q11.2	NM_030805	chr2:97372119-97372060	NM_030805	Hs.655743
A_23_P251927	2.18849	1.12993	2.18849	up	CHCHD3	coiled-coil-helix-coiled-coil-helix domain containing 3	FALSE	Homo sapiens coiled-coil-helix-coiled-coil-helix domain containing 3 (CHCHD3), mRNA [NM_017812]	54927	GO:0005515|GO:0019902|GO:0005743|GO:0005634|GO:0000122|GO:0001227|GO:0006351|GO:0005739|GO:0005737|GO:0032947|GO:0008053|GO:0007007|GO:0070062	132470202	chr7	132470143	-	hs|7q32.3	NM_017812	chr7:132470202-132470143	NM_017812	Hs.655010
A_32_P219368	2.58316	1.36914	2.58316	up	WTAP	Wilms tumor 1 associated protein	FALSE	Homo sapiens Wilms tumor 1 associated protein (WTAP), transcript variant 3, mRNA [NM_152858]	9589	GO:0008380|GO:0006397|GO:0031965|GO:0007049|GO:0016607|GO:0000381|GO:0005730|GO:0080009|GO:0005654|GO:0005634	160169737	chr6	160169678	+	hs|6q25.3	NM_152858	chr6:160169678-160169737	NM_152858	Hs.446091
A_23_P250294	2.68126	1.42291	2.68126	up	ABHD5	abhydrolase domain containing 5	FALSE	Homo sapiens abhydrolase domain containing 5 (ABHD5), mRNA [NM_016006]	51099	GO:0005811|GO:0004806|GO:0042171|GO:0010898|GO:0005634|GO:0044281|GO:0003841|GO:0030154|GO:0043231|GO:0005829|GO:0005737|GO:0010891|GO:0006631|GO:0019433|GO:0006654|GO:0051006	43760090	chr3	43760031	+	hs|3p21.33	NM_016006	chr3:43760031-43760090	NM_016006	Hs.19385
A_23_P35309	3.409	1.76935	3.409	up	TAF5L	TAF5-like RNA polymerase II, p300/CBP-associated factor (PCAF)-associated factor, 65kDa	FALSE	Homo sapiens TAF5-like RNA polymerase II, p300/CBP-associated factor (PCAF)-associated factor, 65kDa (TAF5L), transcript variant 1, mRNA [NM_014409]	27097	GO:0006355|GO:0003700|GO:0043966|GO:0006366|GO:0030914|GO:0003713|GO:0006325|GO:0005654|GO:0005634|GO:0004402|GO:0033276	229729423	chr1	229729364	-	hs|1q42.13	NM_014409	chr1:229729423-229729364	NM_014409	Hs.270621
A_32_P35969	3.65364	1.86933	3.65364	up	CHRNA7	cholinergic receptor, nicotinic, alpha 7 (neuronal)	FALSE	Homo sapiens cholinergic receptor, nicotinic, alpha 7 (neuronal) (CHRNA7), transcript variant 2, mRNA [NM_001190455]	1139	GO:0008284|GO:0030054|GO:0005886|GO:0022848|GO:0007268|GO:0042803|GO:0000187|GO:0001540|GO:0034220|GO:0015464|GO:0045211|GO:0042166|GO:0007613|GO:0006816|GO:0006811|GO:0001666|GO:0006874|GO:0032720|GO:0045766|GO:0005892|GO:0007165|GO:0050890|GO:0015643|GO:0016021|GO:0004889|GO:0017081|GO:0035094	32462281	chr15	32462222	+	hs|15q13.3	NM_001190455	chr15:32462222-32462281	NM_001190455	Hs.511772
A_21_P0000096	6.24352	2.64236	6.24352	up	CPXM1	carboxypeptidase X (M14 family), member 1	FALSE	Homo sapiens carboxypeptidase X (M14 family), member 1 (CPXM1), transcript variant 1, mRNA [NM_019609]	56265	GO:0006508|GO:0008270|GO:0005615|GO:0004181	2774769	chr20	2774710	-	hs|20p13	NM_019609	chr20:2774769-2774710	NM_019609	Hs.659346
A_23_P361049	3.16184	1.66077	3.16184	up	MYO1B	myosin IB	FALSE	Homo sapiens myosin IB (MYO1B), transcript variant 2, mRNA [NM_012223]	4430	GO:0030048|GO:0005516|GO:0048471|GO:0005886|GO:0005884|GO:0005547|GO:0006892|GO:0005546|GO:0030175|GO:0016459|GO:0032588|GO:0005524|GO:0071944|GO:0005903|GO:0000146|GO:0005737|GO:0051015|GO:0008152|GO:0007015|GO:0051017|GO:0010008|GO:0005769|GO:0070062	192289867	chr2	192289808	+	hs|2q32.3	NM_012223	chr2:192289808-192289867	NM_012223	Hs.439620
A_24_P69439	2.0811	1.05734	2.0811	up	SLC25A32	solute carrier family 25 (mitochondrial folate carrier), member 32	FALSE	Homo sapiens solute carrier family 25 (mitochondrial folate carrier), member 32 (SLC25A32), transcript variant 1, mRNA [NM_030780]	81034	GO:0006766|GO:0015884|GO:0005743|GO:0006767|GO:0046655|GO:0044281|GO:0016021|GO:0008517|GO:0006839	104410937	chr8	104410878	-	hs|8q22.3	NM_030780	chr8:104410937-104410878	NM_030780	Hs.607819
A_33_P3373364	2.78927	1.47989	2.78927	up	CLIC4	chloride intracellular channel 4	FALSE	Homo sapiens chloride intracellular channel 4 (CLIC4), mRNA [NM_013943]	25932	GO:0005515|GO:0006821|GO:0048471|GO:0005886|GO:0061299|GO:0035088|GO:0015629|GO:0005254|GO:0016363|GO:0030154|GO:0005829|GO:0005739|GO:0005622|GO:0005737|GO:0035264|GO:0005911|GO:0007035|GO:0015630|GO:0071277|GO:0034765|GO:0030659|GO:0070062|GO:0005813|GO:0030336|GO:0005244|GO:0009986|GO:0034707|GO:0045177|GO:0006915|GO:0030496|GO:0001525|GO:0009566|GO:0005902|GO:0051493|GO:0001886|GO:0030216|GO:…	25167365	chr1	25167306	+	hs|1p36.11	NM_013943	chr1:25167306-25167365	NM_013943	Hs.440544
A_24_P307065	3.39403	1.763	3.39403	up			FALSE	activating transcription factor 4 pseudogene 3 [Source:HGNC Symbol;Acc:HGNC:788] [ENST00000433309]			74222655	chr17	74222596	-	hs|17q25.1		chr17:74222655-74222596
A_32_P174908	2.02455	1.0176	2.02455	up	WAPAL	wings apart-like homolog (Drosophila)	FALSE	Homo sapiens wings apart-like homolog (Drosophila) (WAPAL), mRNA [NM_015045]	23063	GO:0005515|GO:0000795|GO:0005694|GO:0009636|GO:0005634|GO:0071922|GO:0048146|GO:0045875|GO:0035562|GO:0043231|GO:0005829|GO:0005737|GO:0007067|GO:0008278|GO:0015630|GO:0016032|GO:0005654|GO:0008156|GO:0071168|GO:0000278|GO:0000785|GO:0000775|GO:0060623|GO:0051301	88195144	chr10	88195085	-	hs|10q23.2	NM_015045	chr10:88195144-88195085	NM_015045	Hs.203099
A_24_P77676	2.03698	1.02643	2.03698	up	HSPA9	heat shock 70kDa protein 9 (mortalin)	FALSE	Homo sapiens heat shock 70kDa protein 9 (mortalin) (HSPA9), mRNA [NM_004134]	3313	GO:0005515|GO:0042645|GO:0043066|GO:0006626|GO:0005730|GO:0005524|GO:0005739|GO:0005737|GO:0006457|GO:0006611|GO:0051082|GO:0005925|GO:0044267|GO:0031625|GO:0070062	137891563	chr5	137891504	-	hs|5q31.2	NM_004134	chr5:137891563-137891504	NM_004134	Hs.184233
A_23_P373724	2.1686	1.11676	2.1686	up	PPFIBP1	PTPRF interacting protein, binding protein 1 (liprin beta 1)	FALSE	Homo sapiens PTPRF interacting protein, binding protein 1 (liprin beta 1) (PPFIBP1), transcript variant 1, mRNA [NM_003622]	8496	GO:0005886|GO:0007155|GO:0005925	27848412	chr12	27848353	+	hs|12p11.22	NM_003622	chr12:27848353-27848412	NM_003622	Hs.172445
A_33_P3379967	2.29642	1.19938	2.29642	up	HLA-F	major histocompatibility complex, class I, F	FALSE	Homo sapiens major histocompatibility complex, class I, F (HLA-F), transcript variant 3, mRNA [NM_001098478]	3134	GO:0002474|GO:0012507|GO:0002480|GO:0005886|GO:0009986|GO:0005783|GO:0042612|GO:0019221|GO:0042590|GO:0005102|GO:0060337|GO:0000139|GO:0016020|GO:0031901|GO:0001916|GO:0050776|GO:0042605|GO:0030670|GO:0071556|GO:0002479|GO:0046978|GO:0046979|GO:0060333	29692173	chr6	29692114	+	hs|6p22.1	NM_001098478	chr6:29692114-29692173	NM_001098478	Hs.519972
A_33_P3415097	3.99263	1.99734	3.99263	up	CLCN4	chloride channel, voltage-sensitive 4	FALSE	Homo sapiens chloride channel, voltage-sensitive 4 (CLCN4), transcript variant 1, mRNA [NM_001830]	1183	GO:0006821|GO:0005247|GO:0005254|GO:0005524|GO:0055085|GO:0044070|GO:0015297|GO:0034220|GO:0031901|GO:0031902|GO:0006810|GO:0016021|GO:0010008	10205594	chrX	10205535	+	hs|Xp22.2	NM_001830	chrX:10205535-10205594	NM_001830	Hs.495674
A_23_P12680	2.53484	1.34189	2.53484	up	PSAP	prosaposin	FALSE	Homo sapiens prosaposin (PSAP), transcript variant 2, mRNA [NM_001042465]	5660	GO:0005515|GO:0060736|GO:0044281|GO:0005765|GO:0005615|GO:0008289|GO:0043231|GO:0005739|GO:0043408|GO:0070062|GO:0043202|GO:0006665|GO:0005794|GO:0006687|GO:0071310|GO:0060742|GO:0005730|GO:0030168|GO:0005576|GO:0043085|GO:0019216|GO:0007596|GO:0006869|GO:0002576|GO:0005654|GO:0016021|GO:0008047	73577030	chr10	73576971	-	hs|10q22.1	NM_001042465	chr10:73577030-73576971	NM_001042465	Hs.523004
A_22_P00002858	2.38508	1.25404	2.38508	up	H1FX-AS1	H1FX antisense RNA 1	FALSE	Homo sapiens H1FX antisense RNA 1 (H1FX-AS1), long non-coding RNA [NR_026991]	339942		129043259	chr3	129043200	+	hs|3q21.3	NR_026991	chr3:129043200-129043259	NR_026991	Hs.450096
A_33_P3287661	2.32912	1.21978	2.32912	up	lnc-C16orf42-2	lnc-C16orf42-2:1	FALSE	Homo sapiens cDNA FLJ45052 fis, clone BRAWH3022542. [AK126997]			1358800	chr16	1358741	-	hs|16p13.3	AK126997	chr16:1358800-1358741
A_23_P399255	3.30674	1.72541	3.30674	up	RNF182	ring finger protein 182	FALSE	Homo sapiens ring finger protein 182 (RNF182), transcript variant 2, mRNA [NM_152737]	221687	GO:0005515|GO:0005737|GO:0004842|GO:0016567|GO:0016874|GO:0008270|GO:0016021	13980056	chr6	13979997	+	hs|6p23	NM_152737	chr6:13979997-13980056	NM_152737	Hs.111164
A_23_P110879	2.8071	1.48908	2.8071	up	TRAF3IP2	TRAF3 interacting protein 2	FALSE	Homo sapiens TRAF3 interacting protein 2 (TRAF3IP2), transcript variant 2, mRNA [NM_147686]	10758	GO:0035556|GO:0005515|GO:0001783|GO:0006959|GO:0005575|GO:0043123|GO:0048305	111894122	chr6	111888861	-	hs|6q21	NM_147686	chr6:111894122-111888861	NM_147686	Hs.561514
A_21_P0006989	2.71518	1.44105	2.71518	up	LOC101929465	uncharacterized LOC101929465	FALSE	PREDICTED: Homo sapiens uncharacterized LOC101929465 (LOC101929465), ncRNA [XR_246526]	101929465		44787612	chr10	44787553	-	hs|10q11.21	XR_246526	chr10:44787612-44787553	XR_246526
A_23_P38304	2.77319	1.47155	2.77319	up	CD300LG	CD300 molecule-like family member g	FALSE	Homo sapiens CD300 molecule-like family member g (CD300LG), transcript variant 1, mRNA [NM_145273]	146894	GO:0016323|GO:0016324|GO:0002414|GO:0001791|GO:0032585|GO:0016021|GO:0070062|GO:0002376	41926247	chr17	41926188	+	hs|17q21.31	NM_145273	chr17:41926188-41926247	NM_145273	Hs.147313
A_23_P202881	2.14497	1.10096	2.14497	up	FEZ1	fasciculation and elongation protein zeta 1 (zygin I)	FALSE	Homo sapiens fasciculation and elongation protein zeta 1 (zygin I) (FEZ1), transcript variant 1, mRNA [NM_005103]	9638	GO:0005515|GO:0030424|GO:0005813|GO:0043015|GO:0005886|GO:0005874|GO:0030425|GO:0007399|GO:0005739|GO:0051654|GO:0005737|GO:0047485|GO:0071363|GO:0007411|GO:0005080|GO:0010976|GO:0015630|GO:0006810|GO:0007155	125322241	chr11	125318416	-	hs|11q24.2	NM_005103	chr11:125322241-125318416	NM_005103	Hs.224008
A_23_P20970	2.08042	1.05687	2.08042	up	ATG12	autophagy related 12	FALSE	Homo sapiens autophagy related 12 (ATG12), transcript variant 1, mRNA [NM_004707]	9140	GO:0006995|GO:0006501|GO:0005515|GO:0034045|GO:0000422|GO:0045087|GO:0019776|GO:0034274|GO:0000045|GO:0032480	115167432	chr5	115167373	-	hs|5q22.3	NM_004707	chr5:115167432-115167373	NM_004707	Hs.264482
A_23_P4679	3.85193	1.94558	3.85193	up	ERF	Ets2 repressor factor	FALSE	Homo sapiens Ets2 repressor factor (ERF), transcript variant 1, mRNA [NM_006494]	2077	GO:0060710|GO:0006366|GO:0000981|GO:0003714|GO:0060707|GO:0005634|GO:0000122|GO:0030154|GO:0005829|GO:0043565|GO:0007049|GO:0005654|GO:0010668	42752305	chr19	42752246	-	hs|19q13.2	NM_006494	chr19:42752305-42752246	NM_006494	Hs.655969
A_23_P161424	2.17448	1.12067	2.17448	up	PLXDC2	plexin domain containing 2	FALSE	Homo sapiens plexin domain containing 2 (PLXDC2), transcript variant 1, mRNA [NM_032812]	84898	GO:0005515|GO:0007275|GO:0004872|GO:0016021|GO:0070062	20568778	chr10	20568719	+	hs|10p12.31	NM_032812	chr10:20568719-20568778	NM_032812	Hs.658134
A_23_P427217	3.55804	1.83108	3.55804	up	JMJD1C	jumonji domain containing 1C	FALSE	Homo sapiens jumonji domain containing 1C (JMJD1C), transcript variant 1, mRNA [NM_032776]	221037	GO:0046966|GO:0005622|GO:0005515|GO:0006355|GO:0007596|GO:0051213|GO:0005654|GO:0046872|GO:0006351|GO:0055114|GO:0016568	64928279	chr10	64928220	-	hs|10q21.3	NM_032776	chr10:64928279-64928220	NM_032776	Hs.413416
A_23_P151870	3.58395	1.84155	3.58395	up	GLCE	glucuronic acid epimerase	FALSE	Homo sapiens glucuronic acid epimerase (GLCE), mRNA [NM_015554]	26035	GO:0005794|GO:0005975|GO:0047464|GO:0015012|GO:0044281|GO:0006024|GO:0000139|GO:0009405|GO:0016857|GO:0050379|GO:0016021|GO:0030203|GO:0030210	69564113	chr15	69564054	+	hs|15q23	NM_015554	chr15:69564054-69564113	NM_015554	Hs.183006
A_24_P10137	3.36061	1.74872	3.36061	up	RGCC	regulator of cell cycle	FALSE	Homo sapiens regulator of cell cycle (RGCC), mRNA [NM_014059]	28984	GO:0005515|GO:0008285|GO:2000573|GO:0010718|GO:0005634|GO:2000048|GO:0050715|GO:0050710|GO:0071158|GO:0003331|GO:0006956|GO:0005737|GO:0051091|GO:0045944|GO:0001100|GO:0005813|GO:0072537|GO:0019901|GO:0071456|GO:0090272|GO:0045840|GO:0070412|GO:0030295|GO:0071850|GO:0010628|GO:0031659|GO:0032967|GO:0001937|GO:0016525|GO:0051496|GO:2000353|GO:0043537	42044635	chr13	42042937	+	hs|13q14.11	NM_014059	chr13:42042937-42044635	NM_014059	Hs.507866
A_23_P207456	4.96209	2.31095	4.96209	up	CCL8	chemokine (C-C motif) ligand 8	FALSE	Homo sapiens chemokine (C-C motif) ligand 8 (CCL8), mRNA [NM_005623]	6355	GO:0008009|GO:0006874|GO:0007267|GO:0043085|GO:0009615|GO:0006887|GO:0005615|GO:0007165|GO:0006955|GO:0016004|GO:0004672|GO:0006954|GO:0006935|GO:0060326|GO:0006468|GO:0006816|GO:0008201	32648161	chr17	32648102	+	hs|17q12	NM_005623	chr17:32648102-32648161	NM_005623	Hs.271387
A_23_P342138	4.98175	2.31665	4.98175	up	ADAMTSL1	ADAMTS-like 1	FALSE	Homo sapiens ADAMTS-like 1 (ADAMTSL1), transcript variant 4, mRNA [NM_001040272]	92949	GO:0006493|GO:0006508|GO:0005578|GO:0005788|GO:0008270|GO:0036066|GO:0044267|GO:0008237|GO:0043687	18910252	chr9	18910193	+	hs|9p22.1	NM_001040272	chr9:18910193-18910252	NM_001040272	Hs.741483
A_23_P106906	4.56143	2.18949	4.56143	up	PPL	periplakin	FALSE	Homo sapiens periplakin (PPL), mRNA [NM_002705]	5493	GO:0030057|GO:0005739|GO:0005515|GO:0005886|GO:0031424|GO:0005200|GO:0005634|GO:0005856|GO:0070062	4933127	chr16	4933068	-	hs|16p13.3	NM_002705	chr16:4933127-4933068	NM_002705	Hs.192233
A_33_P3280694	2.57888	1.36675	2.57888	up	GSAP	gamma-secretase activating protein	FALSE	gamma-secretase activating protein [Source:HGNC Symbol;Acc:HGNC:28042] [ENST00000334003]	54103	GO:0030162|GO:0005802|GO:0001540	76958930	chr7	76958871	-	hs|7q11.23	AL834358	chr7:76958930-76958871		Hs.186649
A_23_P83298	3.10493	1.63456	3.10493	up	PRRX2	paired related homeobox 2	FALSE	Homo sapiens paired related homeobox 2 (PRRX2), mRNA [NM_016307]	51450	GO:0043565|GO:0045880|GO:0006355|GO:0042472|GO:0003700|GO:0051216|GO:0048844|GO:0042474|GO:0005634|GO:0002053|GO:0030326|GO:0048701	132484932	chr9	132484873	+	hs|9q34.11	NM_016307	chr9:132484873-132484932	NM_016307	Hs.660115
A_24_P355944	5.81253	2.53917	5.81253	up	EFNB2	ephrin-B2	FALSE	Homo sapiens ephrin-B2 (EFNB2), mRNA [NM_004093]	1948	GO:0005515|GO:0010839|GO:0048013|GO:0005886|GO:0002042|GO:0007267|GO:0009653|GO:2000727|GO:0046875|GO:0050920|GO:0005887|GO:0007411|GO:0009887|GO:0016032|GO:0007155|GO:0005925|GO:0001945	107142795	chr13	107142736	-	hs|13q33.3	NM_004093	chr13:107142795-107142736	NM_004093	Hs.149239
A_33_P3405444	2.23341	1.15925	2.23341	up	WASL	Wiskott-Aldrich syndrome-like	FALSE	Homo sapiens Wiskott-Aldrich syndrome-like (WASL), mRNA [NM_003941]	8976	GO:0005515|GO:2000370|GO:0005886|GO:0050999|GO:0051491|GO:0006928|GO:0005634|GO:0044281|GO:0006900|GO:0015629|GO:0005829|GO:0032880|GO:0009617|GO:0016050|GO:0005083|GO:0007411|GO:0034629|GO:0046209|GO:0070062|GO:0006355|GO:0048013|GO:0030478|GO:0003779|GO:0006351|GO:0030027|GO:0051653|GO:0030666|GO:0007067|GO:0006461|GO:0008154|GO:0045087|GO:0030050|GO:0016023|GO:2000601|GO:0038096|GO:0051301	123322060	chr7	123322001	-	hs|7q31.32	NM_003941	chr7:123322060-123322001	NM_003941	Hs.731519
A_23_P351734	6.95042	2.7971	6.95042	up	NPHP4	nephronophthisis 4	FALSE	Homo sapiens nephronophthisis 4 (NPHP4), transcript variant 1, mRNA [NM_015102]	261734	GO:0005515|GO:0005813|GO:0006996|GO:0030036|GO:0060041|GO:0007632|GO:0035329|GO:0030317|GO:0045494|GO:0005829|GO:0035845|GO:0007165|GO:0016337|GO:0016020|GO:0005198|GO:0005911|GO:0035869|GO:0032391|GO:0005923|GO:0090090	5922948	chr1	5922889	-	hs|1p36.31	NM_015102	chr1:5922948-5922889	NM_015102	Hs.462348
A_23_P102611	4.38959	2.13409	4.38959	up	WISP2	WNT1 inducible signaling pathway protein 2	FALSE	Homo sapiens WNT1 inducible signaling pathway protein 2 (WISP2), mRNA [NM_003881]	8839	GO:0007165|GO:0005178|GO:0005886|GO:0060548|GO:0007267|GO:0005578|GO:0007155|GO:0008201|GO:0005615|GO:0001558|GO:0070062|GO:0005520	43356406	chr20	43356347	+	hs|20q13.12	NM_003881	chr20:43356347-43356406	NM_003881	Hs.592145
A_32_P217655	2.44972	1.29261	2.44972	up	LOC645166	lymphocyte-specific protein 1 pseudogene	FALSE	Homo sapiens lymphocyte-specific protein 1 pseudogene (LOC645166), transcript variant 2, non-coding RNA [NR_027355]	645166		148951568	chr1	148951509	+	hs|1q21.2	NR_027355	chr1:148951509-148951568	NR_027355	Hs.744183
A_23_P25069	2.6392	1.4001	2.6392	up	OVOS2	ovostatin 2	FALSE		144203	GO:0010951|GO:0004867|GO:0005615	31267800	chr12	31267369	-	hs|12p11.21	XR_424313	chr12:31267800-31267369	XR_424313	Hs.524331
A_23_P69383	2.46728	1.30292	2.46728	up	PARP9	poly (ADP-ribose) polymerase family, member 9	FALSE	Homo sapiens poly (ADP-ribose) polymerase family, member 9 (PARP9), transcript variant 1, mRNA [NM_031458]	83666	GO:0005515|GO:0005737|GO:0016477|GO:0016020|GO:0005634|GO:0060330|GO:0006302|GO:0005829|GO:0003950	122247356	chr3	122247297	-	hs|3q21.1	NM_031458	chr3:122247356-122247297	NM_031458	Hs.518200
A_23_P100441	2.05382	1.03831	2.05382	up	FAM192A	family with sequence similarity 192, member A	FALSE	Homo sapiens family with sequence similarity 192, member A (FAM192A), mRNA [NM_024946]	80011	GO:0005634	57186520	chr16	57186461	-	hs|16q13	NM_024946	chr16:57186520-57186461	NM_024946	Hs.396740
A_21_P0012874	2.62663	1.39321	2.62663	up	LINC00847	long intergenic non-protein coding RNA 847	FALSE	Homo sapiens long intergenic non-protein coding RNA 847 (LINC00847), transcript variant 1, long non-coding RNA [NR_027183]	729678		180261746	chr5	180261687	+	hs|5q35.3	NR_027183	chr5:180261687-180261746	NR_027183	Hs.348292
A_23_P72068	2.86484	1.51846	2.86484	up	GMDS	GDP-mannose 4,6-dehydratase	FALSE	Homo sapiens GDP-mannose 4,6-dehydratase (GMDS), transcript variant 1, mRNA [NM_001500]	2762	GO:0005737|GO:0007219|GO:0008446|GO:0019673|GO:0042351|GO:0070401|GO:0070062	1960186	chr6	1960127	-	hs|6p25.3	NM_001500	chr6:1960186-1960127	NM_001500	Hs.144496
A_33_P3282394	2.07728	1.0547	2.07728	up	MLLT1	myeloid/lymphoid or mixed-lineage leukemia (trithorax homolog, Drosophila); translocated to, 1	FALSE	Homo sapiens myeloid/lymphoid or mixed-lineage leukemia (trithorax homolog, Drosophila); translocated to, 1 (MLLT1), mRNA [NM_005934]	4298	GO:0005515|GO:0006355|GO:0005737|GO:0006366|GO:0005730|GO:0005654|GO:0005634|GO:0006469|GO:0008023|GO:0003677	6210517	chr19	6210458	-	hs|19p13.3	NM_005934	chr19:6210517-6210458	NM_005934	Hs.10095
A_23_P168828	5.20316	2.37939	5.20316	up	KLF10	Kruppel-like factor 10	FALSE	Homo sapiens Kruppel-like factor 10 (KLF10), transcript variant 1, mRNA [NM_005655]	7071	GO:0005515|GO:0003700|GO:0008285|GO:0008283|GO:0007267|GO:0045672|GO:0005634|GO:0030282|GO:0000122|GO:0046872|GO:0006351|GO:0001501|GO:0042752|GO:0007623|GO:0007179|GO:0001046|GO:0045892|GO:0035019|GO:0009267	103661422	chr8	103661366	-	hs|8q22.3	NM_005655	chr8:103661422-103661366	NM_005655	Hs.435001
A_23_P80570	8.13433	3.02402	8.13433	up	AADAC	arylacetamide deacetylase	FALSE	Homo sapiens arylacetamide deacetylase (AADAC), mRNA [NM_001086]	13	GO:0004806|GO:0008152|GO:0019213|GO:0005789|GO:0010898|GO:0017171|GO:0016021|GO:0003824|GO:0016298	151545842	chr3	151545783	+	hs|3q25.1	NM_001086	chr3:151545783-151545842	NM_001086	Hs.506908
A_23_P29769	2.18009	1.12438	2.18009	up	WWTR1	WW domain containing transcription regulator 1	FALSE	Homo sapiens WW domain containing transcription regulator 1 (WWTR1), transcript variant 1, mRNA [NM_015472]	25937	GO:0005515|GO:0010467|GO:0008284|GO:0006367|GO:0016567|GO:0045599|GO:0017145|GO:0010718|GO:0005634|GO:0031146|GO:0035414|GO:0042803|GO:0032835|GO:0005829|GO:0005737|GO:0035264|GO:0045944|GO:0072307|GO:0060993|GO:0007179|GO:0090090|GO:0005667|GO:0006355|GO:0003714|GO:0048762|GO:0003713|GO:0000122|GO:0035329|GO:0060390|GO:0006351|GO:0001649|GO:0060271|GO:0001933|GO:0005654|GO:0006469	149238652	chr3	149238593	-	hs|3q25.1	NM_015472	chr3:149238652-149238593	NM_015472	Hs.477921
A_23_P30200	2.9772	1.57396	2.9772	up	PCDHB16	protocadherin beta 16	FALSE	Homo sapiens protocadherin beta 16 (PCDHB16), mRNA [NM_020957]	57717	GO:0016339|GO:0005886|GO:0005509|GO:0007268|GO:0016021|GO:0007416|GO:0007156	140565394	chr5	140565335	+	hs|5q31.3	NM_020957	chr5:140565335-140565394	NM_020957	Hs.147674
A_32_P177024	2.74633	1.45751	2.74633	up	SBDS	Shwachman-Bodian-Diamond syndrome	FALSE	Homo sapiens Shwachman-Bodian-Diamond syndrome (SBDS), mRNA [NM_016038]	51119	GO:0005515|GO:0008017|GO:0042256|GO:0008283|GO:0030595|GO:0043148|GO:0006364|GO:0001833|GO:0005730|GO:0005634|GO:0048539|GO:0019843|GO:0030282|GO:0000922|GO:0005737|GO:0043022|GO:0042273|GO:0005654	66453156	chr7	66453097	-	hs|7q11.21	NM_016038	chr7:66453156-66453097	NM_016038	Hs.110445
A_23_P30254	2.47949	1.31004	2.47949	up	PLK2	polo-like kinase 2	FALSE	Homo sapiens polo-like kinase 2 (PLK2), transcript variant 1, mRNA [NM_006622]	10769	GO:0005515|GO:0007093|GO:0032436|GO:0007265|GO:0060291|GO:0060292|GO:0046599|GO:0032403|GO:0030425|GO:0032092|GO:0005622|GO:0000082|GO:0048167|GO:0007613|GO:0004871|GO:0061000|GO:0007052|GO:0043123|GO:0005813|GO:0043066|GO:0032486|GO:0005814|GO:0005524|GO:0004674|GO:0006468	57750052	chr5	57749993	-	hs|5q11.2	NM_006622	chr5:57750052-57749993	NM_006622	Hs.398157
A_23_P160466	4.02258	2.00812	4.02258	up	SLC19A2	solute carrier family 19 (thiamine transporter), member 2	FALSE	Homo sapiens solute carrier family 19 (thiamine transporter), member 2 (SLC19A2), mRNA [NM_006996]	10560	GO:0005515|GO:0015403|GO:0015234|GO:0015888|GO:0005886|GO:0015884|GO:0006767|GO:0071934|GO:0008517|GO:0044281|GO:0042723|GO:0006766|GO:0016021	169433321	chr1	169433262	-	hs|1q24.2	NM_006996	chr1:169433321-169433262	NM_006996	Hs.30246
A_23_P408996	2.55288	1.35212	2.55288	up	MBOAT1	membrane bound O-acyltransferase domain containing 1	FALSE	Homo sapiens membrane bound O-acyltransferase domain containing 1 (MBOAT1), transcript variant 1, mRNA [NM_001080480]	154141	GO:0036150|GO:0016747|GO:0005789|GO:0044281|GO:0016021|GO:0006644|GO:0046474|GO:0036152	20101206	chr6	20101147	-	hs|6p22.3	NM_001080480	chr6:20101206-20101147	NM_001080480	Hs.377830
A_23_P99163	2.1346	1.09397	2.1346	up	DRAM1	DNA-damage regulated autophagy modulator 1	FALSE	Homo sapiens DNA-damage regulated autophagy modulator 1 (DRAM1), mRNA [NM_018370]	55332	GO:0005737|GO:0006914|GO:0010506|GO:0006915|GO:0016021|GO:0005765|GO:0005764	102317171	chr12	102317112	+	hs|12q23.2	NM_018370	chr12:102317112-102317171	NM_018370	Hs.525634
A_23_P141636	2.06935	1.04917	2.06935	up	EIF4A3	eukaryotic translation initiation factor 4A3	FALSE	Homo sapiens eukaryotic translation initiation factor 4A3 (EIF4A3), mRNA [NM_014740]	9775	GO:0017148|GO:0005515|GO:0010467|GO:0006364|GO:0019221|GO:0045727|GO:0071013|GO:0003729|GO:0048701|GO:0005524|GO:0005829|GO:0004004|GO:0005737|GO:0016607|GO:0016020|GO:0000184|GO:0000398|GO:0008143|GO:0005654|GO:0051028|GO:0035145|GO:0000289|GO:0000288	78109220	chr17	78109161	-	hs|17q25.3	NM_014740	chr17:78109220-78109161	NM_014740	Hs.389649
A_24_P85200	2.25244	1.17149	2.25244	up	ELMSAN1	ELM2 and Myb/SANT-like domain containing 1	FALSE	Homo sapiens ELM2 and Myb/SANT-like domain containing 1 (ELMSAN1), transcript variant 1, mRNA [NM_194278]	91748	GO:0006355|GO:0003682|GO:0005654|GO:0003677|GO:0006351	74182252	chr14	74182193	-	hs|14q24.3	NM_194278	chr14:74182252-74182193	NM_194278	Hs.594157
A_23_P333498	2.94195	1.55677	2.94195	up	EEPD1	endonuclease/exonuclease/phosphatase family domain containing 1	FALSE	Homo sapiens endonuclease/exonuclease/phosphatase family domain containing 1 (EEPD1), mRNA [NM_030636]	80820	GO:0006281|GO:0003677	36340917	chr7	36340858	+	hs|7p14.2	NM_030636	chr7:36340858-36340917	NM_030636	Hs.487994
A_24_P690924	2.07657	1.0542	2.07657	up	SEC23B	Sec23 homolog B (S. cerevisiae)	FALSE	Homo sapiens Sec23 homolog B (S. cerevisiae) (SEC23B), transcript variant 2, mRNA [NM_032985]	10483	GO:0006888|GO:0048471|GO:0030127|GO:0016020|GO:0000139|GO:0033116|GO:0005789|GO:0008270|GO:0016192|GO:0006886|GO:0043231|GO:0012505	18534900	chr20	18531782	+	hs|20p11.23	NM_032985	chr20:18531782-18534900	NM_032985	Hs.369373
A_23_P138507	2.07796	1.05517	2.07796	up	CDK1	cyclin-dependent kinase 1	FALSE	Homo sapiens cyclin-dependent kinase 1 (CDK1), transcript variant 1, mRNA [NM_001786]	983	GO:0005515|GO:0007077|GO:0014070|GO:0033160|GO:0030261|GO:0034501|GO:0014075|GO:0002756|GO:0018105|GO:0007173|GO:0000165|GO:0007411|GO:0018107|GO:0002755|GO:0005813|GO:0038124|GO:0006996|GO:0038123|GO:0034134|GO:0030332|GO:0007569|GO:0030496|GO:0009636|GO:0002224|GO:0035173|GO:0006281|GO:0008543|GO:0030544|GO:0035666|GO:0034166|GO:0005654|GO:0000278|GO:0038095|GO:0034162|GO:0004693|GO:0007095|GO:…	62553650	chr10	62552004	+	hs|10q21.2	NM_001786	chr10:62552004-62553650	NM_001786	Hs.732435
A_23_P136347	2.2346	1.16001	2.2346	up	EPS8	epidermal growth factor receptor pathway substrate 8	FALSE	Homo sapiens epidermal growth factor receptor pathway substrate 8 (EPS8), mRNA [NM_004447]	2059	GO:0005515|GO:0008344|GO:0030054|GO:0008283|GO:0008360|GO:0017146|GO:0030426|GO:0070358|GO:0030832|GO:0051016|GO:0007173|GO:0051764|GO:0005938|GO:0051017|GO:0070062|GO:0010458|GO:0031532|GO:0014069|GO:0032420|GO:0009967|GO:0003779|GO:0032587|GO:0031982|GO:0007165|GO:0048365|GO:0016601|GO:0048149|GO:0005070	15774235	chr12	15774176	-	hs|12p12.3	NM_004447	chr12:15774235-15774176	NM_004447	Hs.591160
A_24_P8220	2.01523	1.01094	2.01523	up	HS6ST1	heparan sulfate 6-O-sulfotransferase 1	FALSE	Homo sapiens heparan sulfate 6-O-sulfotransferase 1 (HS6ST1), mRNA [NM_004807]	9394	GO:0048286|GO:0005975|GO:0001525|GO:0044281|GO:0006024|GO:0015015|GO:0000139|GO:0005887|GO:0048666|GO:0060716|GO:0008146|GO:0009405|GO:0017095|GO:0030203	129023118	chr2	129023059	-	hs|2q14.3	NM_004807	chr2:129023118-129023059	NM_004807	Hs.512841
A_33_P3316273	3.30517	1.72473	3.30517	up	CCL3	chemokine (C-C motif) ligand 3	FALSE	Homo sapiens chemokine (C-C motif) ligand 3 (CCL3), mRNA [NM_002983]	6348	GO:0005515|GO:0019722|GO:0051928|GO:0008360|GO:0006887|GO:0005615|GO:0042802|GO:0005622|GO:0031726|GO:0043525|GO:0006935|GO:0000165|GO:0016301|GO:0071356|GO:0007610|GO:0070374|GO:0031663|GO:0008009|GO:0030335|GO:0032760|GO:0023052|GO:0030593|GO:0071621|GO:0009636|GO:0014808|GO:0030502|GO:0043085|GO:0042056|GO:0043308|GO:0001649|GO:0043922|GO:0016004|GO:0071346|GO:0071347|GO:0043491|GO:0048245|GO:…	34415664	chr17	34415605	-	hs|17q12	NM_002983	chr17:34415664-34415605	NM_002983	Hs.514107
A_23_P11995	2.00357	1.00258	2.00357	up	PRDX1	peroxiredoxin 1	FALSE	Homo sapiens peroxiredoxin 1 (PRDX1), transcript variant 1, mRNA [NM_002574]	5052	GO:0005515|GO:0042345|GO:0005782|GO:0008283|GO:0042267|GO:0034101|GO:0005634|GO:0032872|GO:0005615|GO:0042803|GO:0005829|GO:0005737|GO:0004601|GO:0001895|GO:0005759|GO:0019430|GO:0042744|GO:0070062|GO:0042470|GO:0005719|GO:0005730|GO:0008379|GO:0001501|GO:0000302|GO:0020037|GO:0055114	45980589	chr1	45980295	-	hs|1p34.1	NM_002574	chr1:45980589-45980295	NM_002574	Hs.180909
A_23_P15944	2.57048	1.36204	2.57048	up	ELAC1	elaC ribonuclease Z 1	FALSE	Homo sapiens elaC ribonuclease Z 1 (ELAC1), mRNA [NM_018696]	55520	GO:0016891|GO:0042779|GO:0005634|GO:0046872|GO:0005829	48513431	chr18	48513372	+	hs|18q21.2	NM_018696	chr18:48513372-48513431	NM_018696	Hs.657360
A_24_P66528	2.02709	1.01941	2.02709	up	SRP9	signal recognition particle 9kDa	FALSE	Homo sapiens signal recognition particle 9kDa (SRP9), transcript variant 2, mRNA [NM_003133]	6726	GO:0005786|GO:0010467|GO:0005785|GO:0006614|GO:0003723|GO:0008312|GO:0005047|GO:0044267|GO:0006412|GO:0070062|GO:0045900|GO:0005829	225971068	chr1	225971009	+	hs|1q42.12	NM_003133	chr1:225971009-225971068	NM_003133	Hs.511425
A_23_P400515	2.18131	1.1252	2.18131	up	KIF17	kinesin family member 17	FALSE	Homo sapiens kinesin family member 17 (KIF17), transcript variant 1, mRNA [NM_020816]	57576	GO:0008017|GO:0005871|GO:0006996|GO:0005930|GO:0031503|GO:0005874|GO:0072372|GO:0015031|GO:0005524|GO:0036064|GO:0005829|GO:0030030|GO:0008152|GO:0008574|GO:0032391|GO:0030992|GO:0016192|GO:0016887|GO:0022008|GO:0007018	20990700	chr1	20990641	-	hs|1p36.12	NM_020816	chr1:20990700-20990641	NM_020816	Hs.130411
A_33_P3226710	2.27256	1.18432	2.27256	up	C7orf13	chromosome 7 open reading frame 13	FALSE	Homo sapiens chromosome 7 open reading frame 13 (C7orf13), long non-coding RNA [NR_026865]	129790	GO:0016021	156432812	chr7	156432753	-	hs|7q36.3	NR_026865	chr7:156432812-156432753	NR_026865	Hs.647014
A_21_P0012766	2.41972	1.27484	2.41972	up	EVA1C	eva-1 homolog C (C. elegans)	FALSE	Homo sapiens eva-1 homolog C (C. elegans) (EVA1C), transcript variant 1, mRNA [NM_058187]	59271	GO:0030246|GO:0016021	33876322	chr21	33876263	+	hs|21q22.11	NM_058187	chr21:33876263-33876322	NM_058187	Hs.208358
A_23_P71752	2.67539	1.41975	2.67539	up	ZFAND5	zinc finger, AN1-type domain 5	FALSE	Homo sapiens zinc finger, AN1-type domain 5 (ZFAND5), transcript variant c, mRNA [NM_006007]	7763	GO:0005515|GO:0048705|GO:0005575|GO:0001701|GO:0003677|GO:0003674|GO:0008150|GO:0010761|GO:0003016|GO:0005737|GO:0048745|GO:0060324|GO:0008270|GO:0048008|GO:0001944	74969825	chr9	74969766	-	hs|9q21.13	NM_006007	chr9:74969825-74969766	NM_006007	Hs.406096
A_33_P3522525	2.45874	1.29792	2.45874	up	GRPEL1	GrpE-like 1, mitochondrial (E. coli)	FALSE	Homo sapiens GrpE-like 1, mitochondrial (E. coli) (GRPEL1), mRNA [NM_025196]	80273	GO:0005739|GO:0050790|GO:0006457|GO:0005759|GO:0006626|GO:0051087|GO:0051082|GO:0044267|GO:0042803|GO:0000774	7062315	chr4	7062256	-	hs|4p16.1	NM_025196	chr4:7062315-7062256	NM_025196	Hs.443723
A_23_P118353	2.06655	1.04722	2.06655	up	SRP68	signal recognition particle 68kDa	FALSE	Homo sapiens signal recognition particle 68kDa (SRP68), transcript variant 1, mRNA [NM_014230]	6730	GO:0005786|GO:0010467|GO:0005783|GO:0042493|GO:0030942|GO:0006614|GO:0008312|GO:0005730|GO:0045047|GO:0006412|GO:0005829|GO:0005737|GO:0005840|GO:0005047|GO:0005048|GO:0044267|GO:0005925	74041401	chr17	74040009	-	hs|17q25.1	NM_014230	chr17:74041401-74040009	NM_014230	Hs.514495
A_33_P3336257	9.10977	3.18741	9.10977	up	IRX1	iroquois homeobox 1	FALSE	Homo sapiens iroquois homeobox 1 (IRX1), mRNA [NM_024337]	79192	GO:0043565|GO:0006355|GO:0072272|GO:0005634|GO:0072086	3601497	chr5	3601438	+	hs|5p15.33	NM_024337	chr5:3601438-3601497	NM_024337	Hs.424156
A_23_P61371	3.09469	1.62979	3.09469	up	TMEM173	transmembrane protein 173	FALSE	Homo sapiens transmembrane protein 173 (TMEM173), transcript variant 1, mRNA [NM_198282]	340061	GO:0005515|GO:0048471|GO:0032479|GO:0033160|GO:0005886|GO:0035458|GO:0005741|GO:0002218|GO:0042993|GO:0042803|GO:0032092|GO:0035438|GO:0042802|GO:0051607|GO:0045944|GO:0032481|GO:0030659|GO:0031625|GO:0005777|GO:0032608|GO:0005794|GO:0019901|GO:0006915|GO:0071360|GO:0002230|GO:0045087|GO:0005789|GO:0016021|GO:0008134	138855656	chr5	138855597	-	hs|5q31.2	NM_198282	chr5:138855656-138855597	NM_198282	Hs.379754
A_23_P131737	2.39216	1.25832	2.39216	up	VPS54	vacuolar protein sorting 54 homolog (S. cerevisiae)	FALSE	Homo sapiens vacuolar protein sorting 54 homolog (S. cerevisiae) (VPS54), transcript variant 1, mRNA [NM_016516]	51542	GO:0005515|GO:0019905|GO:0048471|GO:0060052|GO:0005794|GO:0006896|GO:0015031|GO:0048873|GO:0050881|GO:0042147|GO:0005654|GO:0040007|GO:0000938	64120444	chr2	64120385	-	hs|2p14	NM_016516	chr2:64120444-64120385	NM_016516	Hs.48499
A_23_P164737	3.44433	1.78422	3.44433	up	MED26	mediator complex subunit 26	FALSE	Homo sapiens mediator complex subunit 26 (MED26), mRNA [NM_004831]	9441	GO:0005515|GO:0010467|GO:0006367|GO:0001104|GO:0006357|GO:0016592|GO:0003713|GO:0005654|GO:0003677	16685876	chr19	16685817	-	hs|19p13.11	NM_004831	chr19:16685876-16685817	NM_004831	Hs.715040
A_23_P311616	2.87278	1.52245	2.87278	up	JMJD6	jumonji domain containing 6	FALSE	Homo sapiens jumonji domain containing 6 (JMJD6), transcript variant 2, mRNA [NM_015167]	23210	GO:0005515|GO:0008380|GO:0048024|GO:0003727|GO:0070815|GO:0060041|GO:0005886|GO:0030324|GO:0003723|GO:0005634|GO:0002040|GO:0042802|GO:0007507|GO:0033746|GO:0048821|GO:0033749|GO:0004872|GO:0006397|GO:0006355|GO:0033077|GO:0070079|GO:0005506|GO:0070078|GO:0001822|GO:0005730|GO:0043654|GO:0018395|GO:0006351|GO:0042116|GO:0005654|GO:0007166|GO:0055114	74717921	chr17	74716563	-	hs|17q25.1	NM_015167	chr17:74717921-74716563	NM_015167	Hs.514505
A_23_P206280	3.16591	1.66262	3.16591	up	GPR56	G protein-coupled receptor 56	FALSE	Homo sapiens G protein-coupled receptor 56 (GPR56), transcript variant 3, mRNA [NM_201525]	9289	GO:0008285|GO:2001223|GO:0004930|GO:0035025|GO:0005518|GO:0050840|GO:0007267|GO:0021801|GO:0001525|GO:0007266|GO:0021819|GO:0070528|GO:0045785|GO:0010573|GO:0007186|GO:0005887|GO:0007420|GO:0016021|GO:0007155|GO:0070062	57698835	chr16	57698776	+	hs|16q21	NM_201525	chr16:57698776-57698835	NM_201525	Hs.513633
A_24_P339944	2.308	1.20665	2.308	up	PDGFB	platelet-derived growth factor beta polypeptide	FALSE	Homo sapiens platelet-derived growth factor beta polypeptide (PDGFB), transcript variant 1, mRNA [NM_002608]	5155	GO:0005515|GO:0005518|GO:0005615|GO:0042803|GO:0042802|GO:0007507|GO:0043552|GO:0007173|GO:0018105|GO:0030198|GO:0007179|GO:0032355|GO:0035793|GO:0032868|GO:0030336|GO:0030335|GO:0045743|GO:0009986|GO:0045740|GO:0010512|GO:0001892|GO:0030168|GO:0045840|GO:0014068|GO:0018108|GO:0005161|GO:0042056|GO:0043536|GO:0008543|GO:0045087|GO:0030031|GO:0005788|GO:0016049|GO:0045892|GO:0008083|GO:0038095|GO:…	39620158	chr22	39620099	-	hs|22q13.1	NM_002608	chr22:39620158-39620099	NM_002608	Hs.1976
A_23_P166135	2.31597	1.21162	2.31597	up	XRN2	5'-3' exoribonuclease 2	FALSE	Homo sapiens 5'-3' exoribonuclease 2 (XRN2), mRNA [NM_012255]	22803	GO:0006353|GO:0006397|GO:0006396|GO:0006355|GO:0008409|GO:0016235|GO:0016070|GO:0005730|GO:0005634|GO:0007283|GO:0006401|GO:0004534|GO:0004518|GO:0016020|GO:0016049|GO:0008270|GO:0000738|GO:0001147	21338413	chr20	21337284	+	hs|20p11.22	NM_012255	chr20:21337284-21338413	NM_012255	Hs.255932
A_23_P139669	18.0595	4.17468	18.0595	up	SLC2A3	solute carrier family 2 (facilitated glucose transporter), member 3	FALSE	Homo sapiens solute carrier family 2 (facilitated glucose transporter), member 3 (SLC2A3), mRNA [NM_006931]	6515	GO:0005886|GO:0005975|GO:0006767|GO:0044281|GO:0055085|GO:0008645|GO:0019852|GO:0015758|GO:0006766|GO:0009405|GO:0016021|GO:0005355|GO:0070062	8077035	chr12	8075591	-	hs|12p13.31	NM_006931	chr12:8077035-8075591	NM_006931	Hs.419240
A_19_P00320792	2.01559	1.0112	2.01559	up	SNHG11	small nucleolar RNA host gene 11 (non-protein coding)	FALSE	Homo sapiens small nucleolar RNA host gene 11 (non-protein coding) (SNHG11), long non-coding RNA [NR_003239]	128439		37076176	chr20	37076117	+	hs|20q11.23	NR_003239	chr20:37076117-37076176	NR_003239	Hs.16936
A_33_P3372426	2.141	1.09828	2.141	up	ADAMTS5	ADAM metallopeptidase with thrombospondin type 1 motif, 5	FALSE	Homo sapiens ADAM metallopeptidase with thrombospondin type 1 motif, 5 (ADAMTS5), mRNA [NM_007038]	11096	GO:0005515|GO:0005578|GO:0005576|GO:0036066|GO:0005178|GO:0006493|GO:0022617|GO:0030198|GO:0006508|GO:0005788|GO:0008270|GO:0004222|GO:0044267|GO:0042742|GO:0008237|GO:0043687	28290319	chr21	28290260	-	hs|21q21.3	NM_007038	chr21:28290319-28290260	NM_007038	Hs.58324
A_23_P154806	2.46907	1.30397	2.46907	up	EPB41L1	erythrocyte membrane protein band 4.1-like 1	FALSE	Homo sapiens erythrocyte membrane protein band 4.1-like 1 (EPB41L1), transcript variant 1, mRNA [NM_012156]	2036	GO:0005886|GO:0030866|GO:0005198|GO:0007268|GO:0003779|GO:0005856|GO:0019898|GO:0005829	34818185	chr20	34818126	+	hs|20q11.23	NM_012156	chr20:34818126-34818185	NM_012156	Hs.437422
A_21_P0000174	6.5525	2.71205	6.5525	up	C5orf56	chromosome 5 open reading frame 56	FALSE	Homo sapiens cDNA, FLJ99232. [AK309191]	441108		131822549	chr5	131822490	+	hs|5q31.1	AK309191	chr5:131822490-131822549		Hs.658288
A_23_P212545	4.59325	2.19951	4.59325	up	RAB5A	RAB5A, member RAS oncogene family	FALSE	Homo sapiens RAB5A, member RAS oncogene family (RAB5A), transcript variant 1, mRNA [NM_004162]	5868	GO:0005515|GO:0030424|GO:0048471|GO:0005886|GO:0003924|GO:0030139|GO:0045022|GO:0015629|GO:0006886|GO:0030425|GO:0005829|GO:0014911|GO:0051489|GO:0045921|GO:0005737|GO:0051036|GO:0030100|GO:0043195|GO:0048169|GO:0043025|GO:0043679|GO:0032482|GO:2000286|GO:0070062|GO:0042470|GO:2000300|GO:0005525|GO:0048661|GO:0001726|GO:0006897|GO:0008021|GO:0045335|GO:0006184|GO:0043234|GO:0051021|GO:0042589|GO:…	20026251	chr3	20026192	+	hs|3p24.3	NM_004162	chr3:20026192-20026251	NM_004162	Hs.475663
A_23_P23924	2.25852	1.17538	2.25852	up	CAPN2	calpain 2, (m/II) large subunit	FALSE	Homo sapiens calpain 2, (m/II) large subunit (CAPN2), transcript variant 1, mRNA [NM_001748]	824	GO:0005515|GO:0008092|GO:0016540|GO:0005886|GO:0005783|GO:0005634|GO:0030425|GO:0005829|GO:0031143|GO:0005737|GO:0071230|GO:0051603|GO:0006508|GO:0000785|GO:0070062|GO:0001666|GO:0005794|GO:0046982|GO:0005509|GO:0001824|GO:0007520|GO:0097038|GO:0004198|GO:0051493|GO:0045121|GO:0008234|GO:0030864|GO:0005925	223963459	chr1	223963400	+	hs|1q41	NM_001748	chr1:223963400-223963459	NM_001748	Hs.350899
A_23_P145631	2.91641	1.54419	2.91641	up	GIMAP6	GTPase, IMAP family member 6	FALSE	Homo sapiens GTPase, IMAP family member 6 (GIMAP6), transcript variant 1, mRNA [NM_024711]	474344	GO:0005525|GO:0005829	150323214	chr7	150323155	-	hs|7q36.1	NM_024711	chr7:150323214-150323155	NM_024711	Hs.647105
A_23_P140748	2.39237	1.25844	2.39237	up	NDRG4	NDRG family member 4	FALSE	Homo sapiens NDRG family member 4 (NDRG4), transcript variant 3, mRNA [NM_022910]	65009	GO:0035050|GO:0006950|GO:0048662|GO:0060038|GO:0014912|GO:0030154|GO:0005829|GO:0001947|GO:0005739|GO:0003674|GO:0016323|GO:0005737|GO:0010976|GO:0005789|GO:0016049|GO:0070374|GO:0010642	58547168	chr16	58547109	+	hs|16q21	NM_022910	chr16:58547109-58547168	NM_022910	Hs.322430
A_23_P215484	4.62268	2.20873	4.62268	up	CCL26	chemokine (C-C motif) ligand 26	FALSE	Homo sapiens chemokine (C-C motif) ligand 26 (CCL26), mRNA [NM_006072]	10344	GO:0008009|GO:0007165|GO:0006955|GO:0030335|GO:0006954|GO:0030838|GO:0006935|GO:0001938|GO:0060326|GO:0007267|GO:0032855|GO:0005615	75401219	chr7	75399061	-	hs|7q11.23	NM_006072	chr7:75401219-75399061	NM_006072	Hs.131342
A_24_P81965	2.361	1.2394	2.361	up	RAP2A	RAP2A, member of RAS oncogene family	FALSE	Homo sapiens RAP2A, member of RAS oncogene family (RAP2A), mRNA [NM_021033]	5911	GO:0005515|GO:0030336|GO:0005886|GO:0031532|GO:0032486|GO:0030033|GO:0003924|GO:0030496|GO:0005525|GO:0072659|GO:0035690|GO:0045198|GO:0045184|GO:0005829|GO:0048814|GO:0046328|GO:0006184|GO:0001934|GO:0034613|GO:0055037|GO:0055038|GO:0070062|GO:0031954	98119503	chr13	98119444	+	hs|13q32.1	NM_021033	chr13:98119444-98119503	NM_021033	Hs.508480
A_33_P3884230	2.06841	1.04853	2.06841	up	NFIX	nuclear factor I/X (CCAAT-binding transcription factor)	FALSE	Homo sapiens nuclear factor I/X (CCAAT-binding transcription factor) (NFIX), transcript variant 2, mRNA [NM_002501]	4784	GO:0021707|GO:0006260|GO:0003700|GO:0006366|GO:0021680|GO:0048708|GO:0045944|GO:0003705|GO:0005634|GO:0000122|GO:0003677	13186431	chr19	13186372	+	hs|19p13.2	NM_002501	chr19:13186372-13186431	NM_002501	Hs.257970
A_23_P28869	2.33581	1.22393	2.33581	up	PTPRA	protein tyrosine phosphatase, receptor type, A	FALSE	Homo sapiens protein tyrosine phosphatase, receptor type, A (PTPRA), transcript variant 1, mRNA [NM_002836]	5786	GO:0043235|GO:0008286|GO:0005515|GO:0005886|GO:0007411|GO:0005887|GO:0005001|GO:0006468|GO:0035335|GO:0004725|GO:0070062	3018847	chr20	3018788	+	hs|20p13	NM_002836	chr20:3018788-3018847	NM_002836	Hs.269577
A_23_P130753	2.65734	1.40999	2.65734	up	DBP	D site of albumin promoter (albumin D-box) binding protein	FALSE	Homo sapiens D site of albumin promoter (albumin D-box) binding protein (DBP), mRNA [NM_001352]	1628	GO:0001889|GO:0001077|GO:0000977|GO:0006357|GO:0045944|GO:0007623|GO:0005634|GO:0006351	49136805	chr19	49136746	-	hs|19q13.33	NM_001352	chr19:49136805-49136746	NM_001352	Hs.414480
A_33_P3410599	2.2484	1.1689	2.2484	up	FAM46A	family with sequence similarity 46, member A	FALSE	Homo sapiens family with sequence similarity 46, member A (FAM46A), mRNA [NM_017633]	55603	GO:0010468|GO:0030193	82455540	chr6	82455481	-	hs|6q14.1	NM_017633	chr6:82455540-82455481	NM_017633	Hs.10784
A_23_P74320	2.56703	1.3601	2.56703	up	SCYL3	SCY1-like 3 (S. cerevisiae)	FALSE	Homo sapiens SCY1-like 3 (S. cerevisiae) (SCYL3), transcript variant 1, mRNA [NM_020423]	57147	GO:0005515|GO:0005737|GO:0005794|GO:0016477|GO:0016301|GO:0006468|GO:0005524|GO:0030027	169822393	chr1	169822334	-	hs|1q24.2	NM_020423	chr1:169822393-169822334	NM_020423	Hs.435560
A_23_P117082	2.13317	1.093	2.13317	up	HEBP1	heme binding protein 1	FALSE	Homo sapiens heme binding protein 1 (HEBP1), mRNA [NM_015987]	50865	GO:0005739|GO:0007623|GO:0005576|GO:0070062|GO:0020037|GO:0005829	13127906	chr12	13127847	-	hs|12p13.1	NM_015987	chr12:13127906-13127847	NM_015987	Hs.642618
A_23_P370682	2.30845	1.20693	2.30845	up	BATF2	basic leucine zipper transcription factor, ATF-like 2	FALSE	Homo sapiens basic leucine zipper transcription factor, ATF-like 2 (BATF2), transcript variant 1, mRNA [NM_138456]	116071	GO:0043565|GO:0005515|GO:0003700|GO:0006357|GO:0042832|GO:0005634|GO:0043011|GO:0006351	64755631	chr11	64755572	-	hs|11q13.1	NM_138456	chr11:64755631-64755572	NM_138456	Hs.124840
A_33_P3623118	4.25981	2.09079	4.25981	up	lnc-MGAT1-1	lnc-MGAT1-1:1	FALSE	Homo sapiens cDNA FLJ30091 fis, clone BNGH41000017. [AK054653]			180211946	chr5	180211887	-	hs|5q35.3	AK054653	chr5:180211946-180211887		Hs.438905
A_23_P29318	2.01111	1.00799	2.01111	up	SAMM50	SAMM50 sorting and assembly machinery component	FALSE	Homo sapiens SAMM50 sorting and assembly machinery component (SAMM50), mRNA [NM_015380]	25813	GO:0005739|GO:0005515|GO:0001401|GO:0006626|GO:0005743|GO:0005741|GO:0016021|GO:0045040|GO:0044267|GO:0070062	44385132	chr22	44385073	+	hs|22q13.31	NM_015380	chr22:44385073-44385132	NM_015380	Hs.505824
A_23_P142849	4.67406	2.22468	4.67406	up	RND3	Rho family GTPase 3	FALSE	Homo sapiens Rho family GTPase 3 (RND3), transcript variant 2, mRNA [NM_005168]	390	GO:0005515|GO:0030036|GO:0000139|GO:0007264|GO:0008152|GO:0003924|GO:0007155|GO:0005525|GO:0005925|GO:0070062	151325166	chr2	151325107	-	hs|2q23.3	NM_005168	chr2:151325166-151325107	NM_005168	Hs.6838
A_23_P19333	2.01427	1.01026	2.01427	up	TREM1	triggering receptor expressed on myeloid cells 1	FALSE	Homo sapiens triggering receptor expressed on myeloid cells 1 (TREM1), transcript variant 1, mRNA [NM_018643]	54210	GO:0072672|GO:0070945|GO:0005886|GO:0030593|GO:0005576|GO:0050900|GO:0035556|GO:0050755|GO:0007596|GO:0006959|GO:0045087|GO:0097110|GO:0004872|GO:0016021|GO:0002374	41248727	chr6	41243938	-	hs|6p21.1	NM_018643	chr6:41248727-41243938	NM_018643	Hs.283022
A_23_P372771	2.74584	1.45725	2.74584	up	FAM219B	family with sequence similarity 219, member B	FALSE	Homo sapiens family with sequence similarity 219, member B (FAM219B), mRNA [NM_020447]	57184		75193321	chr15	75193262	-	hs|15q24.1	NM_020447	chr15:75193321-75193262	NM_020447	Hs.367690
A_23_P47885	2.56186	1.35719	2.56186	up	LRIG3	leucine-rich repeats and immunoglobulin-like domains 3	FALSE	Homo sapiens leucine-rich repeats and immunoglobulin-like domains 3 (LRIG3), transcript variant 2, mRNA [NM_153377]	121227	GO:0005886|GO:0032474|GO:0016021|GO:0005615|GO:0030659	59266361	chr12	59266302	-	hs|12q14.1	NM_153377	chr12:59266361-59266302	NM_153377	Hs.253736
A_23_P305140	2.18725	1.12912	2.18725	up	C10orf32	chromosome 10 open reading frame 32	FALSE	Homo sapiens chromosome 10 open reading frame 32 (C10orf32), transcript variant 2, mRNA [NM_144591]	119032		104623911	chr10	104623852	+	hs|10q24.32	NM_144591	chr10:104623852-104623911	NM_144591	Hs.34492
A_23_P7791	2.28901	1.19472	2.28901	up	OGFRL1	opioid growth factor receptor-like 1	FALSE	Homo sapiens opioid growth factor receptor-like 1 (OGFRL1), mRNA [NM_024576]	79627	GO:0016020|GO:0004872	72011872	chr6	72011813	+	hs|6q13	NM_024576	chr6:72011813-72011872	NM_024576	Hs.656091
A_23_P311087	2.32612	1.21792	2.32612	up	ZNF281	zinc finger protein 281	FALSE	Homo sapiens zinc finger protein 281 (ZNF281), transcript variant 1, mRNA [NM_012482]	23528	GO:0005515|GO:0010172|GO:0003700|GO:0044212|GO:0003714|GO:0001047|GO:0005634|GO:0000122|GO:0000978|GO:0046872|GO:0006351|GO:0048863|GO:0043565|GO:0001078|GO:0010629|GO:0005654|GO:0045893|GO:0045892	200376392	chr1	200376333	-	hs|1q32.1	NM_012482	chr1:200376392-200376333	NM_012482	Hs.59757
A_23_P35082	2.6334	1.39693	2.6334	up	SESN2	sestrin 2	FALSE	Homo sapiens sestrin 2 (SESN2), mRNA [NM_031459]	83667	GO:0005515|GO:0032868|GO:0032042|GO:0005737|GO:0006635|GO:0046323|GO:0043491|GO:0006914|GO:0070328|GO:2000479|GO:0005634|GO:0009749	28608253	chr1	28608194	+	hs|1p35.3	NM_031459	chr1:28608194-28608253	NM_031459	Hs.469543
A_24_P174613	2.30637	1.20562	2.30637	up	FBXW7	F-box and WD repeat domain containing 7, E3 ubiquitin protein ligase	FALSE	Homo sapiens F-box and WD repeat domain containing 7, E3 ubiquitin protein ligase (FBXW7), transcript variant 1, mRNA [NM_033632]	55294	GO:0005515|GO:0003700|GO:0016567|GO:0005783|GO:0030324|GO:0032876|GO:0031146|GO:2000639|GO:0097027|GO:0042802|GO:0032880|GO:0034644|GO:0005737|GO:0007219|GO:0031398|GO:0016032|GO:0051443|GO:0070374|GO:0030674|GO:0031625|GO:0001944|GO:0045746|GO:0006355|GO:0010868|GO:0005794|GO:0045741|GO:0030332|GO:2000346|GO:0055088|GO:0050821|GO:0005730|GO:0010883|GO:0006974|GO:0043234|GO:2000060|GO:0007062|GO:…	153242517	chr4	153242458	-	hs|4q31.3	NM_033632	chr4:153242517-153242458	NM_033632	Hs.561245
A_24_P133253	3.96183	1.98617	3.96183	up	KITLG	KIT ligand	FALSE	Homo sapiens KIT ligand (KITLG), transcript variant b, mRNA [NM_000899]	4254	GO:0005515|GO:0033026|GO:0005886|GO:0008283|GO:0001755|GO:0050731|GO:0046579|GO:0005615|GO:0035234|GO:0005737|GO:0007173|GO:0043406|GO:0045636|GO:0007155|GO:0005856|GO:0035162|GO:0048011|GO:0048015|GO:0045740|GO:0005576|GO:0005125|GO:0097192|GO:0007165|GO:0008543|GO:0045087|GO:0002763|GO:0016021|GO:0008083|GO:0070668|GO:0005173|GO:0008584|GO:0038095	88886712	chr12	88886653	-	hs|12q21.32	NM_000899	chr12:88886712-88886653	NM_000899	Hs.1048
A_23_P211973	2.53357	1.34117	2.53357	up	NEK11	NIMA-related kinase 11	FALSE	Homo sapiens NIMA-related kinase 11 (NEK11), transcript variant 1, mRNA [NM_024800]	79858	GO:0035556|GO:0005515|GO:0004674|GO:0031573|GO:0031572|GO:0005730|GO:0006468|GO:0005654|GO:0005524|GO:0046872	130962317	chr3	130947511	+	hs|3q22.1	NM_024800	chr3:130947511-130962317	NM_024800	Hs.657336
A_24_P72064	3.02281	1.59589	3.02281	up	GHR	growth hormone receptor	FALSE	Homo sapiens growth hormone receptor (GHR), transcript variant 1, mRNA [NM_000163]	2690	GO:0005515|GO:0042977|GO:0006549|GO:0005886|GO:0019530|GO:0000255|GO:0019221|GO:0050731|GO:0042523|GO:0060396|GO:0060397|GO:0005615|GO:0042803|GO:0032870|GO:0031623|GO:0006101|GO:0000187|GO:0019838|GO:0006105|GO:0040014|GO:0006103|GO:0006631|GO:0044236|GO:0070195|GO:0006573|GO:0040018|GO:0070064|GO:0032355|GO:0004896|GO:0009986|GO:0019901|GO:0042517|GO:0006107|GO:0046898|GO:0005576|GO:0046449|GO:…	42721508	chr5	42721449	+	hs|5p12	NM_000163	chr5:42721449-42721508	NM_000163	Hs.125180
A_33_P3251821	2.09863	1.06945	2.09863	up	TRAPPC13	trafficking protein particle complex 13	FALSE	Homo sapiens trafficking protein particle complex 13 (TRAPPC13), transcript variant 4, non-coding RNA [NR_003545]	80006	GO:0005515	64926344	chr5	64926285	+	hs|5q12.3	NR_003545	chr5:64926285-64926344	NR_003545	Hs.591760
A_24_P270728	2.22575	1.15429	2.22575	up	NUPR1	nuclear protein, transcriptional regulator, 1	FALSE	Homo sapiens nuclear protein, transcriptional regulator, 1 (NUPR1), transcript variant 1, mRNA [NM_001042483]	26471	GO:0002526|GO:0006355|GO:0043065|GO:0048147|GO:0009636|GO:0005634|GO:0045786|GO:0035914|GO:0003677|GO:0006351|GO:0031401|GO:0042771|GO:0003674|GO:0005737|GO:0006461|GO:0003682|GO:0016049|GO:2000194|GO:0006473|GO:0008584	28548880	chr16	28548821	-	hs|16p11.2	NM_001042483	chr16:28548880-28548821	NM_001042483	Hs.513463
A_23_P134454	3.40384	1.76716	3.40384	up	CAV1	caveolin 1, caveolae protein, 22kDa	FALSE	Homo sapiens caveolin 1, caveolae protein, 22kDa (CAV1), transcript variant 1, mRNA [NM_001753]	857	GO:0005515|GO:0043627|GO:0019915|GO:0010524|GO:0030879|GO:0006940|GO:0030301|GO:0005113|GO:0042802|GO:0005622|GO:0016050|GO:0000165|GO:0031397|GO:0032507|GO:0005938|GO:0042632|GO:0005811|GO:0019901|GO:0000122|GO:0019217|GO:0044325|GO:0016504|GO:0043234|GO:0005929|GO:0005887|GO:0007519|GO:0002931|GO:0032570|GO:0006641|GO:0045121|GO:0019899|GO:0005925|GO:0032091|GO:0005886|GO:0005783|GO:0031295|GO:…	116200801	chr7	116200742	+	hs|7q31.2	NM_001753	chr7:116200742-116200801	NM_001753	Hs.74034
A_23_P9135	2.09531	1.06717	2.09531	up	CNTNAP3	contactin associated protein-like 3	FALSE	Homo sapiens contactin associated protein-like 3 (CNTNAP3), mRNA [NM_033655]	79937	GO:0008037|GO:0005886|GO:0005576|GO:0016021|GO:0007155	39073363	chr9	39073304	-	hs|9p13.1	NM_033655	chr9:39073363-39073304	NM_033655	Hs.128474
A_33_P3312466	3.58626	1.84248	3.58626	up	BTNL9	butyrophilin-like 9	FALSE	Homo sapiens butyrophilin-like 9 (BTNL9), mRNA [NM_152547]	153579	GO:0016021	180488430	chr5	180488371	+	hs|5q35.3	NM_152547	chr5:180488371-180488430	NM_152547	Hs.546502
A_23_P354908	6.28621	2.65219	6.28621	up	NMNAT2	nicotinamide nucleotide adenylyltransferase 2	FALSE	Homo sapiens nicotinamide nucleotide adenylyltransferase 2 (NMNAT2), transcript variant 1, mRNA [NM_015039]	23057	GO:0005802|GO:0005794|GO:0005770|GO:0019674|GO:0006767|GO:0045202|GO:0044281|GO:0005524|GO:0000139|GO:0000309|GO:0006766|GO:0004515|GO:0009435	183217840	chr1	183217781	-	hs|1q25.3	NM_015039	chr1:183217840-183217781	NM_015039	Hs.497123
A_21_P0000611	2.22559	1.15419	2.22559	up	FLJ20021	uncharacterized LOC90024	FALSE	Homo sapiens uncharacterized LOC90024 (FLJ20021), long non-coding RNA [NR_033874]	90024		102270045	chr4	102269986	+	hs|4q24	NR_033874	chr4:102269986-102270045	NR_033874	Hs.534513
A_23_P76914	2.91416	1.54308	2.91416	up	SIX1	SIX homeobox 1	FALSE	Homo sapiens SIX homeobox 1 (SIX1), mRNA [NM_005982]	6495	GO:0005515|GO:0007389|GO:0001657|GO:0001658|GO:0034504|GO:0003700|GO:0044212|GO:0007605|GO:0048538|GO:0048704|GO:0001759|GO:0030878|GO:0048701|GO:0072075|GO:0043524|GO:0090191|GO:2001014|GO:0030910|GO:0050678|GO:0048839|GO:0042472|GO:0072107|GO:0000122|GO:0000978|GO:2000729|GO:0072193|GO:0060037|GO:0061055|GO:0072095|GO:0007519|GO:0005654|GO:0014842|GO:0045893|GO:0061197|GO:0051451|GO:0048699|GO:…	61112906	chr14	61112847	-	hs|14q23.1	NM_005982	chr14:61112906-61112847	NM_005982	Hs.633506
A_33_P3382324	4.56047	2.18918	4.56047	up	TPSD1	tryptase delta 1	FALSE	Homo sapiens tryptase delta 1 (TPSD1), mRNA [NM_012217]	23430	GO:0004252|GO:0006508|GO:0008236|GO:0005576	1306942	chr16	1306883	+	hs|16p13.3	NM_012217	chr16:1306883-1306942	NM_012217	Hs.677789
A_24_P244162	2.12607	1.08819	2.12607	up	PI4K2A	phosphatidylinositol 4-kinase type 2 alpha	FALSE	Homo sapiens phosphatidylinositol 4-kinase type 2 alpha (PI4K2A), mRNA [NM_018425]	55361	GO:0005515|GO:0004430|GO:0043005|GO:0030054|GO:0031224|GO:0044281|GO:0005765|GO:0030425|GO:0005829|GO:0005739|GO:0002561|GO:0043025|GO:0043204|GO:0030672|GO:0005794|GO:0000287|GO:0035651|GO:0006661|GO:0031410|GO:0005524|GO:0046854|GO:0042734|GO:0035838|GO:0016020|GO:0031083|GO:0005887|GO:0031901|GO:0044231|GO:0045121|GO:0006644|GO:0070382|GO:0005768	99435287	chr10	99435228	+	hs|10q24.2	NM_018425	chr10:99435228-99435287	NM_018425	Hs.25300
A_23_P35349	2.77711	1.47359	2.77711	up	SVIL	supervillin	FALSE	Homo sapiens supervillin (SVIL), transcript variant 2, mRNA [NM_021738]	6840	GO:0005515|GO:0005886|GO:0032467|GO:0002102|GO:0030496|GO:0005634|GO:0015629|GO:0032154|GO:0005737|GO:0051015|GO:0007519|GO:0071437|GO:0007010|GO:0043034|GO:0005925	29747064	chr10	29747005	-	hs|10p11.23	NM_021738	chr10:29747064-29747005	NM_021738	Hs.499209
A_24_P124370	2.45816	1.29758	2.45816	up	PARVA	parvin, alpha	FALSE	Homo sapiens parvin, alpha (PARVA), mRNA [NM_018222]	55742	GO:0005515|GO:0070252|GO:0030018|GO:0031532|GO:0005886|GO:0034329|GO:0008360|GO:0071670|GO:0002040|GO:0003779|GO:0005634|GO:0015629|GO:0030027|GO:0005829|GO:0005737|GO:0007163|GO:0060271|GO:0003148|GO:0034446|GO:0034113|GO:0005925	12551318	chr11	12551259	+	hs|11p15.3	NM_018222	chr11:12551259-12551318	NM_018222	Hs.432914
A_33_P3257993	2.48943	1.31581	2.48943	up	RNF125	ring finger protein 125, E3 ubiquitin protein ligase	FALSE	Homo sapiens ring finger protein 125, E3 ubiquitin protein ligase (RNF125), mRNA [NM_017831]	54941	GO:0004842|GO:0016567|GO:0045087|GO:0016874|GO:0008270|GO:0032480	29652970	chr18	29652911	+	hs|18q12.1	NM_017831	chr18:29652911-29652970	NM_017831	Hs.633703
A_23_P20035	3.77136	1.91509	3.77136	up	GPR146	G protein-coupled receptor 146	FALSE	G protein-coupled receptor 146 [Source:HGNC Symbol;Acc:HGNC:21718] [ENST00000397095]	115330	GO:0007186|GO:0005886|GO:0004930|GO:0016021	1098616	chr7	1098557	+	hs|7p22.3	XM_006715642	chr7:1098557-1098616	XM_006715642	Hs.718624
A_19_P00810205	2.99399	1.58207	2.99399	up			FALSE	CCNB2 pseudogene 1 [Source:HGNC Symbol;Acc:HGNC:50850] [ENST00000399411]			7949226	chr7	7949167	-	hs|7p21.3		chr7:7949226-7949167
A_32_P191262	2.09837	1.06927	2.09837	up	ACR	acrosin	FALSE	Homo sapiens acrosin (ACR), mRNA [NM_001097]	49	GO:0005515|GO:0043159|GO:0004252|GO:0005507|GO:0005798|GO:0005576|GO:0005634|GO:0042806|GO:0048545|GO:0007339|GO:0003677|GO:0005537|GO:0007338|GO:0043234|GO:0004040|GO:0007190|GO:0002077|GO:0008144|GO:0008270|GO:0007341|GO:0007340|GO:0032504	51183664	chr22	51183605	+	hs|22q13.33	NM_001097	chr22:51183605-51183664	NM_001097	Hs.370870
A_23_P110957	2.61546	1.38706	2.61546	up	FOXF2	forkhead box F2	FALSE	Homo sapiens forkhead box F2 (FOXF2), mRNA [NM_001452]	2295	GO:0005667|GO:0000977|GO:0003700|GO:0005634|GO:0048566|GO:0001837|GO:0001228|GO:0003677|GO:0048596|GO:0006351|GO:0042249|GO:0043565|GO:0030198|GO:0045944|GO:0060021|GO:0048806|GO:0045893|GO:0045892|GO:0008134	1395445	chr6	1395386	+	hs|6p25.3	NM_001452	chr6:1395386-1395445	NM_001452	Hs.484423
A_24_P16610	2.18455	1.12734	2.18455	up	ZNRF1	zinc and ring finger 1, E3 ubiquitin protein ligase	FALSE	Homo sapiens zinc and ring finger 1, E3 ubiquitin protein ligase (ZNRF1), mRNA [NM_032268]	84937	GO:0005515|GO:0004842|GO:0030054|GO:0016020|GO:0016874|GO:0043161|GO:0030672|GO:0008270|GO:0070936|GO:0005764|GO:0005829|GO:0005768	75144359	chr16	75144300	+	hs|16q23.1	NM_032268	chr16:75144300-75144359	NM_032268	Hs.427284
A_23_P349083	2.36562	1.24222	2.36562	up	FCHO2	FCH domain only 2	FALSE	Homo sapiens FCH domain only 2 (FCHO2), transcript variant 1, mRNA [NM_138782]	115548	GO:0072583|GO:0005515|GO:0005905|GO:0005886|GO:0030136|GO:0001786|GO:0005546|GO:0035091|GO:0072659|GO:0010324|GO:0048268	72385998	chr5	72385939	+	hs|5q13.2	NM_138782	chr5:72385939-72385998	NM_138782	Hs.165762
A_24_P941051	2.18005	1.12436	2.18005	up	CSTF2T	cleavage stimulation factor, 3' pre-RNA, subunit 2, 64kDa, tau variant	FALSE	Homo sapiens cleavage stimulation factor, 3' pre-RNA, subunit 2, 64kDa, tau variant (CSTF2T), mRNA [NM_015235]	23283	GO:0006397|GO:0005622|GO:0000166|GO:0005634	53455459	chr10	53455400	-	hs|10q21.1	NM_015235	chr10:53455459-53455400	NM_015235	Hs.591358
A_32_P199252	2.52534	1.33648	2.52534	up	HSP90AA1	heat shock protein 90kDa alpha (cytosolic), class A member 1	FALSE	Homo sapiens heat shock protein 90kDa alpha (cytosolic), class A member 1 (HSP90AA1), transcript variant 1, mRNA [NM_001017963]	3320	GO:0005515|GO:0006986|GO:0005886|GO:0050999|GO:0005634|GO:0044281|GO:0045040|GO:0042803|GO:0045429|GO:0042802|GO:0005829|GO:0005739|GO:0034605|GO:0042026|GO:0005737|GO:0000166|GO:0007411|GO:0071682|GO:0000086|GO:0046209|GO:0030235|GO:0051131|GO:0006839|GO:0016887|GO:0070062|GO:0048010|GO:0042470|GO:0030911|GO:0006996|GO:0005576|GO:0005524|GO:0006898|GO:0007165|GO:0016020|GO:0045087|GO:0023026|GO:…	102550222	chr14	102550163	-	hs|14q32.31	NM_001017963	chr14:102550222-102550163	NM_001017963	Hs.525600
A_33_P3280355	2.01337	1.00961	2.01337	up			FALSE				16492298	chrX	16492239	-	hs|Xp22.2		chrX:016492298-016492239
A_24_P280833	2.15201	1.10568	2.15201	up	LOC100129138	THAP domain containing, apoptosis associated protein 3 pseudogene	FALSE	Homo sapiens THAP domain containing, apoptosis associated protein 3 pseudogene (LOC100129138), non-coding RNA [NR_033990]	100129138		104616395	chr1	104616336	+	hs|1p21.1	NR_033990	chr1:104616336-104616395	NR_033990	Hs.514487
A_33_P3475737	2.25302	1.17186	2.25302	up	ZBTB8A	zinc finger and BTB domain containing 8A	FALSE	Homo sapiens zinc finger and BTB domain containing 8A (ZBTB8A), transcript variant 1, mRNA [NM_001040441]	653121	GO:0008150|GO:0003674|GO:0006355|GO:0005634|GO:0005575|GO:0003677|GO:0046872|GO:0006351	33066227	chr1	33066168	+	hs|1p35.1	NM_001040441	chr1:33066168-33066227	NM_001040441	Hs.546479
A_33_P3343090	2.69062	1.42794	2.69062	up	MAP1S	microtubule-associated protein 1S	FALSE	Homo sapiens microtubule-associated protein 1S (MAP1S), mRNA [NM_018174]	55201	GO:0005515|GO:0008017|GO:0048471|GO:0030054|GO:0001578|GO:0045202|GO:0005634|GO:0042995|GO:0030425|GO:0005829|GO:0042802|GO:0005737|GO:0051015|GO:0015631|GO:0047497|GO:0043025|GO:0005874|GO:0005819|GO:0005730|GO:0048487|GO:0097194|GO:0003677|GO:0007399|GO:0004536|GO:0007420|GO:0006309|GO:0048812	17845322	chr19	17845263	+	hs|19p13.11	NM_018174	chr19:17845263-17845322	NM_018174	Hs.66048
A_23_P133375	2.03773	1.02696	2.03773	up	SLC25A46	solute carrier family 25, member 46	FALSE	Homo sapiens solute carrier family 25, member 46 (SLC25A46), transcript variant 1, mRNA [NM_138773]	91137	GO:0008150|GO:0003674|GO:0006810|GO:0005743|GO:0016021|GO:0005575	110098316	chr5	110098257	+	hs|5q22.1	NM_138773	chr5:110098257-110098316	NM_138773	Hs.75639
A_33_P3382944	2.38565	1.25438	2.38565	up	YJEFN3	YjeF N-terminal domain containing 3	FALSE	Homo sapiens YjeF N-terminal domain containing 3 (YJEFN3), transcript variant 1, mRNA [NM_198537]	374887		19648393	chr19	19648334	+	hs|19p13.11	NM_198537	chr19:19648334-19648393	NM_198537	Hs.729508
A_33_P3393734	2.01458	1.01048	2.01458	up	RPS27	ribosomal protein S27	FALSE	ribosomal protein S27 [Source:HGNC Symbol;Acc:HGNC:10416] [ENST00000392558]	6232	GO:0005515|GO:0010467|GO:0003735|GO:0008283|GO:0019083|GO:0006614|GO:0019058|GO:0005634|GO:0006415|GO:0003677|GO:0006412|GO:0006413|GO:0005829|GO:0006414|GO:0000184|GO:0022627|GO:0016032|GO:0005840|GO:0008270|GO:0000278|GO:0044267	153963785	chr1	153963726	+	hs|1q21.3		chr1:153963726-153963785
A_23_P252471	2.61226	1.3853	2.61226	up	PECAM1	platelet/endothelial cell adhesion molecule 1	FALSE	Homo sapiens platelet/endothelial cell adhesion molecule 1 (PECAM1), mRNA [NM_000442]	5175	GO:0072011|GO:0005515|GO:0006909|GO:0008037|GO:0030054|GO:0005886|GO:0030168|GO:0050900|GO:0005615|GO:0050904|GO:0007165|GO:0007596|GO:0030198|GO:0002576|GO:0031092|GO:0016021|GO:0007155|GO:0070062	62400603	chr17	62400544	-	hs|17q23.3	NM_000442	chr17:62400603-62400544	NM_000442	Hs.376675
A_23_P309619	2.068	1.04824	2.068	up	KIAA1671	KIAA1671	FALSE	Homo sapiens KIAA1671 (KIAA1671), mRNA [NM_001145206]	85379		25592762	chr22	25592703	+	hs|22q11.23	NM_001145206	chr22:25592703-25592762	NM_001145206	Hs.419171
A_23_P102890	3.21064	1.68286	3.21064	up	MRPS6	mitochondrial ribosomal protein S6	FALSE	Homo sapiens mitochondrial ribosomal protein S6 (MRPS6), mRNA [NM_032476]	64968	GO:0070124|GO:0005515|GO:0070125|GO:0070126|GO:0032543|GO:0006996|GO:0003735|GO:0015935|GO:0005743|GO:0070181|GO:0006412|GO:0005763	35515286	chr21	35515227	+	hs|21q22.11	NM_032476	chr21:35515227-35515286	NM_032476	Hs.302742
A_23_P500998	3.13204	1.6471	3.13204	up	HOXA9	homeobox A9	FALSE	Homo sapiens homeobox A9 (HOXA9), mRNA [NM_152739]	3205	GO:0005515|GO:0005667|GO:0060065|GO:0006355|GO:0048706|GO:0060216|GO:0030879|GO:0005634|GO:0007275|GO:0009954|GO:0007283|GO:0009952|GO:0006351|GO:0043565|GO:0007338|GO:0005737|GO:0045638|GO:0042118|GO:0005654|GO:0035115|GO:0019899|GO:0008584	27202647	chr7	27202588	-	hs|7p15.2	NM_152739	chr7:27202647-27202588	NM_152739	Hs.659350
A_23_P345118	3.31061	1.7271	3.31061	up	PIM1	Pim-1 proto-oncogene, serine/threonine kinase	FALSE	Homo sapiens Pim-1 proto-oncogene, serine/threonine kinase (PIM1), transcript variant 1, mRNA [NM_002648]	5292	GO:0005515|GO:0043066|GO:0030145|GO:0005886|GO:0008283|GO:0006915|GO:0005634|GO:0007275|GO:0005524|GO:0043433|GO:0007346|GO:0031659|GO:0005737|GO:0007049|GO:0046777|GO:0004674|GO:0030212|GO:0006468|GO:0043024|GO:0008134	37143161	chr6	37143102	+	hs|6p21.2	NM_002648	chr6:37143102-37143161	NM_002648	Hs.81170
A_24_P329065	2.04913	1.03501	2.04913	up	BTN3A1	butyrophilin, subfamily 3, member A1	FALSE	Homo sapiens butyrophilin, subfamily 3, member A1 (BTN3A1), transcript variant 1, mRNA [NM_007048]	11119	GO:0005515|GO:0072643|GO:0050852|GO:0050663|GO:0005886|GO:0050798|GO:0016021	26414802	chr6	26414743	+	hs|6p22.2	NM_007048	chr6:26414743-26414802	NM_007048	Hs.191510
A_23_P207020	2.03895	1.02783	2.03895	up	WDR45B	WD repeat domain 45B	FALSE	Homo sapiens WD repeat domain 45B (WDR45B), mRNA [NM_019613]	56270	GO:0006995|GO:0034045|GO:0000422|GO:0080025|GO:0006497|GO:0032266|GO:0000045|GO:0034497|GO:0019898|GO:0005829	80572621	chr17	80572562	-	hs|17q25.3	NM_019613	chr17:80572621-80572562	NM_019613	Hs.132161
A_23_P204286	2.00401	1.00289	2.00401	up	MGP	matrix Gla protein	FALSE	Homo sapiens matrix Gla protein (MGP), transcript variant 2, mRNA [NM_000900]	4256	GO:0031012|GO:0005515|GO:0030500|GO:0001503|GO:0001502|GO:0005509|GO:0005578|GO:0008147|GO:0030154|GO:0070062|GO:0005201	15034999	chr12	15034940	-	hs|12p12.3	NM_000900	chr12:15034999-15034940	NM_000900	Hs.365706
A_23_P217009	2.27791	1.18771	2.27791	up	C9orf24	chromosome 9 open reading frame 24	FALSE	Homo sapiens chromosome 9 open reading frame 24 (C9orf24), transcript variant 1, mRNA [NM_032596]	84688	GO:0048471|GO:0043014|GO:0002177|GO:0005634|GO:0007283|GO:0043623|GO:0030154	34379083	chr9	34379024	-	hs|9p13.3	NM_032596	chr9:34379083-34379024	NM_032596	Hs.50334
A_23_P60339	2.77056	1.47018	2.77056	up	C9orf64	chromosome 9 open reading frame 64	FALSE	Homo sapiens chromosome 9 open reading frame 64 (C9orf64), mRNA [NM_032307]	84267	GO:0008150|GO:0003674|GO:0005575	86554414	chr9	86554355	-	hs|9q21.32	NM_032307	chr9:86554414-86554355	NM_032307	Hs.208914
A_23_P306987	8.31824	3.05628	8.31824	up	SOX7	SRY (sex determining region Y)-box 7	FALSE	Homo sapiens SRY (sex determining region Y)-box 7 (SOX7), mRNA [NM_031439]	83595	GO:0001706|GO:0003700|GO:0008285|GO:0006357|GO:0006366|GO:0044212|GO:0003705|GO:0005634|GO:0060828|GO:0043280|GO:0043565|GO:0005737|GO:0045893|GO:0045892	10582106	chr8	10582047	-	hs|8p23.1	NM_031439	chr8:10582106-10582047	NM_031439	Hs.709543
A_23_P63660	2.1814	1.12525	2.1814	up	FAM213A	family with sequence similarity 213, member A	FALSE	Homo sapiens family with sequence similarity 213, member A (FAM213A), transcript variant 1, mRNA [NM_032333]	84293	GO:0005739|GO:0005737|GO:0016209|GO:0045670|GO:0070062|GO:0055114	82191949	chr10	82191890	+	hs|10q23.1	NM_032333	chr10:82191890-82191949	NM_032333	Hs.500333
A_33_P3349843	2.57302	1.36346	2.57302	up			FALSE	AGENCOURT_7835728 NIH_MGC_67 Homo sapiens cDNA clone IMAGE:6145127 5', mRNA sequence [BU171032]			180222497	chr5	180222438	-	hs|5q35.3	BU171032	chr5:180222497-180222438		Hs.736216
A_33_P3345389	2.07275	1.05155	2.07275	up	C20orf194	chromosome 20 open reading frame 194	FALSE	Homo sapiens chromosome 20 open reading frame 194 (C20orf194), mRNA [NM_001009984]	25943		3230007	chr20	3229948	-	hs|20p13	NM_001009984	chr20:3230007-3229948	NM_001009984	Hs.516853
A_23_P27584	2.73345	1.45072	2.73345	up	MYADM	myeloid-associated differentiation marker	FALSE	Homo sapiens myeloid-associated differentiation marker (MYADM), transcript variant 1, mRNA [NM_001020818]	91663	GO:0031579|GO:0030335|GO:0005886|GO:0072661|GO:0010810|GO:0001726|GO:0045217|GO:0003674|GO:0090038|GO:1900026|GO:0061028|GO:0005911|GO:0010629|GO:0030837|GO:0034115|GO:0001933|GO:0045121|GO:0016021|GO:0030864|GO:0070062	54379620	chr19	54379561	+	hs|19q13.42	NM_001020818	chr19:54379561-54379620	NM_001020818	Hs.380906
A_23_P318904	2.19697	1.13552	2.19697	up	SERTAD4	SERTA domain containing 4	FALSE	Homo sapiens SERTA domain containing 4 (SERTAD4), mRNA [NM_019605]	56256	GO:0005634	210416093	chr1	210416034	+	hs|1q32.2	NM_019605	chr1:210416034-210416093	NM_019605	Hs.600545
A_33_P3263890	4.544	2.18396	4.544	up	PRRX1	paired related homeobox 1	FALSE	Homo sapiens paired related homeobox 1 (PRRX1), transcript variant pmx-1a, mRNA [NM_006902]	5396	GO:0042472|GO:0051216|GO:0003713|GO:0005730|GO:0002053|GO:0005634|GO:0048844|GO:0000122|GO:0030326|GO:0048701|GO:0043565|GO:0045880|GO:0071837|GO:0060021|GO:0042474	170708407	chr1	170708348	+	hs|1q24.2	NM_006902	chr1:170708348-170708407	NM_006902	Hs.283416
A_23_P400505	2.81422	1.49273	2.81422	up	C1QTNF9	C1q and tumor necrosis factor related protein 9	FALSE	Homo sapiens C1q and tumor necrosis factor related protein 9 (C1QTNF9), transcript variant 2, mRNA [NM_178540]	338872	GO:0005581|GO:0005179|GO:0005576	24895638	chr13	24895579	+	hs|13q12.12	NM_178540	chr13:24895579-24895638	NM_178540	Hs.362854
A_22_P00003880	2.7647	1.46712	2.7647	up	lnc-CENPP-1	lnc-CENPP-1:1	FALSE	LNCipedia lincRNA (lnc-CENPP-1), lincRNA [lnc-CENPP-1:1]			95432868	chr9	95432809	+	hs|9q22.31		chr9:95432809-95432868
A_23_P209904	2.63655	1.39865	2.63655	up	GPC1	glypican 1	FALSE	Homo sapiens glypican 1 (GPC1), mRNA [NM_002081]	2817	GO:0007603|GO:0005886|GO:0044281|GO:0031225|GO:0005615|GO:0014037|GO:0007411|GO:0030200|GO:0030204|GO:2001016|GO:0030203|GO:0070062|GO:0043202|GO:0005975|GO:0005796|GO:0005507|GO:0017134|GO:0005578|GO:0006027|GO:0043395|GO:0001523|GO:0006024|GO:0032288|GO:0005887|GO:0040037|GO:0043236|GO:0009405|GO:0045121|GO:0005768	241407177	chr2	241407118	+	hs|2q37.3	NM_002081	chr2:241407118-241407177	NM_002081	Hs.328232
A_23_P23815	2.06589	1.04676	2.06589	up	SLC30A1	solute carrier family 30 (zinc transporter), member 1	FALSE	Homo sapiens solute carrier family 30 (zinc transporter), member 1 (SLC30A1), mRNA [NM_021194]	7779	GO:0005515|GO:0071577|GO:0031965|GO:0005794|GO:0005886|GO:0005783|GO:0071585|GO:0006874|GO:0006882|GO:0030315|GO:0071584|GO:0055085|GO:0001701|GO:0090281|GO:0046929|GO:0070509|GO:0005737|GO:0005385|GO:0019855|GO:0070574|GO:0006829|GO:0016021	211748901	chr1	211748842	-	hs|1q32.3	NM_021194	chr1:211748901-211748842	NM_021194	Hs.519469
A_23_P53557	2.53114	1.33979	2.53114	up	LTBR	lymphotoxin beta receptor (TNFR superfamily, member 3)	FALSE	Homo sapiens lymphotoxin beta receptor (TNFR superfamily, member 3) (LTBR), transcript variant 1, mRNA [NM_002342]	4055	GO:0005515|GO:0007165|GO:2001238|GO:0046330|GO:0016032|GO:0006915|GO:0043011|GO:0016021|GO:0071260|GO:0043123|GO:0031625|GO:0042802	6500129	chr12	6500070	+	hs|12p13.31	NM_002342	chr12:6500070-6500129	NM_002342	Hs.1116
A_24_P339869	2.71468	1.44078	2.71468	up	ZBTB21	zinc finger and BTB domain containing 21	FALSE	Homo sapiens zinc finger and BTB domain containing 21 (ZBTB21), transcript variant 2, mRNA [NM_020727]	49854	GO:0005515|GO:0008327|GO:0006355|GO:0005634|GO:0045892|GO:0046872|GO:0006351	43407139	chr21	43407080	-	hs|21q22.3	NM_020727	chr21:43407139-43407080	NM_020727	Hs.434947
A_23_P45185	4.3093	2.10745	4.3093	up	FIGF	c-fos induced growth factor (vascular endothelial growth factor D)	FALSE	Homo sapiens c-fos induced growth factor (vascular endothelial growth factor D) (FIGF), mRNA [NM_004469]	2277	GO:0048010|GO:0008284|GO:0008283|GO:0030168|GO:0060754|GO:0005576|GO:0001525|GO:0005161|GO:0042056|GO:0005615|GO:0042803|GO:0030154|GO:0050918|GO:0050930|GO:0016020|GO:0007596|GO:0002576|GO:0043185|GO:0051781|GO:0031093|GO:0005172|GO:0008083	15363842	chrX	15363783	-	hs|Xp22.2	NM_004469	chrX:15363842-15363783	NM_004469	Hs.11392
A_24_P321411	2.24959	1.16966	2.24959	up	PRKRIR	protein-kinase, interferon-inducible double stranded RNA dependent inhibitor, repressor of (P58 repressor)	FALSE	Homo sapiens protein-kinase, interferon-inducible double stranded RNA dependent inhibitor, repressor of (P58 repressor) (PRKRIR), mRNA [NM_004705]	5612	GO:0007165|GO:0008285|GO:0046983|GO:0006950|GO:0005634|GO:0003677|GO:0046872	76061610	chr11	76061551	-	hs|11q13.5	NM_004705	chr11:76061610-76061551	NM_004705	Hs.503315
A_32_P116271	2.04359	1.03111	2.04359	up	WDFY3-AS2	WDFY3 antisense RNA 2	FALSE	Homo sapiens WDFY3 antisense RNA 2 (WDFY3-AS2), long non-coding RNA [NR_015359]	404201		85890999	chr4	85890940	+	hs|4q21.23	NR_015359	chr4:85890940-85890999	NR_015359	Hs.720920
A_23_P121447	2.18397	1.12695	2.18397	up	ACTRT3	actin-related protein T3	FALSE	Homo sapiens actin-related protein T3 (ACTRT3), mRNA [NM_032487]	84517	GO:0005737|GO:0005856|GO:0001673	169485353	chr3	169485294	-	hs|3q26.2	NM_032487	chr3:169485353-169485294	NM_032487	Hs.135411
A_23_P105392	2.03316	1.02372	2.03316	up	CCT2	chaperonin containing TCP1, subunit 2 (beta)	FALSE	Homo sapiens chaperonin containing TCP1, subunit 2 (beta) (CCT2), transcript variant 1, mRNA [NM_006431]	10576	GO:0005515|GO:0005832|GO:0005874|GO:0007339|GO:0005524|GO:0044297|GO:0005829|GO:0005737|GO:0006457|GO:0051084|GO:0002199|GO:0051082|GO:0051131|GO:0044267|GO:0031625|GO:0070062	69995240	chr12	69995181	+	hs|12q15	NM_006431	chr12:69995181-69995240	NM_006431	Hs.189772
A_23_P411188	3.54782	1.82693	3.54782	up	CHRNA10	cholinergic receptor, nicotinic, alpha 10 (neuronal)	FALSE	Homo sapiens cholinergic receptor, nicotinic, alpha 10 (neuronal) (CHRNA10), transcript variant 1, mRNA [NM_020402]	57053	GO:0030424|GO:0005262|GO:0030054|GO:0042472|GO:0005102|GO:0007204|GO:0005892|GO:0007271|GO:0016020|GO:0050910|GO:0042127|GO:0045211|GO:0070588|GO:0043204|GO:0004889	3687068	chr11	3687009	-	hs|11p15.4	NM_020402	chr11:3687068-3687009	NM_020402	Hs.732806
A_24_P270999	3.72042	1.89547	3.72042	up	SCN4A	sodium channel, voltage gated, type IV alpha subunit	FALSE	Homo sapiens sodium channel, voltage gated, type IV alpha subunit (SCN4A), mRNA [NM_000334]	6329	GO:0006936|GO:0086010|GO:0005886|GO:0005887|GO:0005248|GO:0035725|GO:0034765|GO:0001518|GO:0006814|GO:0019228	62016580	chr17	62016521	-	hs|17q23.3	NM_000334	chr17:62016580-62016521	NM_000334	Hs.46038
A_23_P52227	5.56606	2.47666	5.56606	up	GDF10	growth differentiation factor 10	FALSE	Homo sapiens growth differentiation factor 10 (GDF10), mRNA [NM_004962]	2662	GO:0010862|GO:0042981|GO:0005125|GO:0005160|GO:0005615|GO:0060395|GO:0001501|GO:0043408|GO:0045444|GO:0007179|GO:0048468|GO:0008083|GO:0040007	48425995	chr10	48425936	-	hs|10q11.22	NM_004962	chr10:48425995-48425936	NM_004962	Hs.2171
A_24_P11131	2.03529	1.02523	2.03529	up	SRRM1	serine/arginine repetitive matrix 1	FALSE	Homo sapiens serine/arginine repetitive matrix 1 (SRRM1), transcript variant 2, mRNA [NM_005839]	10250	GO:0008380|GO:0006369|GO:0010467|GO:0006366|GO:0031124|GO:0005634|GO:0071013|GO:0003677|GO:0016363|GO:0005829|GO:0006406|GO:0016607|GO:0000398|GO:0000375|GO:0005654	24999534	chr1	24999475	+	hs|1p36.11	NM_005839	chr1:24999475-24999534	NM_005839	Hs.18192
A_23_P143446	2.0927	1.06536	2.0927	up	MRPL39	mitochondrial ribosomal protein L39	FALSE	Homo sapiens mitochondrial ribosomal protein L39 (MRPL39), transcript variant 1, mRNA [NM_017446]	54148	GO:0070124|GO:0070125|GO:0008150|GO:0070126|GO:0032543|GO:0006996|GO:0000166|GO:0005761|GO:0005743	26965250	chr21	26965191	-	hs|21q21.3	NM_017446	chr21:26965250-26965191	NM_017446	Hs.420696
A_24_P329924	2.21056	1.14441	2.21056	up	SIK3	SIK family kinase 3	FALSE	Homo sapiens SIK family kinase 3 (SIK3), transcript variant 1, mRNA [NM_025164]	23387	GO:0032880|GO:0005515|GO:0005737|GO:0001958|GO:0000287|GO:0035264|GO:0004674|GO:0060351|GO:0006468|GO:0035108|GO:0005524	116714247	chr11	116714188	-	hs|11q23.3	NM_025164	chr11:116714247-116714188	NM_025164	Hs.167451
A_23_P77502	2.12487	1.08737	2.12487	up	PKD1	polycystic kidney disease 1 (autosomal dominant)	FALSE	Homo sapiens polycystic kidney disease 1 (autosomal dominant) (PKD1), transcript variant 1, mRNA [NM_001009944]	5310	GO:0005515|GO:0006807|GO:0060674|GO:0072237|GO:0051216|GO:0034405|GO:0042994|GO:0009653|GO:0007507|GO:0016337|GO:0018105|GO:0050982|GO:0072177|GO:0006611|GO:0048806|GO:0070062|GO:0005262|GO:0006996|GO:0019901|GO:0060236|GO:0019904|GO:0001892|GO:0072372|GO:0002133|GO:0072205|GO:0001701|GO:0044325|GO:0001889|GO:0072287|GO:0005929|GO:0001502|GO:0005887|GO:0070588|GO:0043588|GO:0060170|GO:0060428|GO:…	2139313	chr16	2139254	-	hs|16p13.3	NM_001009944	chr16:2139313-2139254	NM_001009944	Hs.75813
A_23_P34915	5.14704	2.36374	5.14704	up	ATF3	activating transcription factor 3	FALSE	Homo sapiens activating transcription factor 3 (ATF3), transcript variant 4, mRNA [NM_001040619]	467	GO:0005515|GO:0008284|GO:0000977|GO:0003700|GO:0003714|GO:0005730|GO:0006094|GO:0005634|GO:0000122|GO:0035914|GO:0000978|GO:0001228|GO:0006351|GO:0042802|GO:0030968|GO:0001078|GO:0045944|GO:0005654|GO:0006987|GO:0044267	212793915	chr1	212793856	+	hs|1q32.3	NM_001040619	chr1:212793856-212793915	NM_001040619	Hs.460
A_23_P37569	2.26632	1.18035	2.26632	up	MAN2A2	mannosidase, alpha, class 2A, member 2	FALSE	Homo sapiens mannosidase, alpha, class 2A, member 2 (MAN2A2), mRNA [NM_006122]	4122	GO:0004572|GO:0000139|GO:0030246|GO:0008270|GO:0016021|GO:0044267|GO:0016799|GO:0043687|GO:0018279|GO:0006013	91465603	chr15	91465544	+	hs|15q26.1	NM_006122	chr15:91465544-91465603	NM_006122	Hs.116459
A_23_P127676	2.80132	1.48611	2.80132	up	CTR9	CTR9, Paf1/RNA polymerase II complex component	FALSE	Homo sapiens CTR9, Paf1/RNA polymerase II complex component (CTR9), mRNA [NM_014633]	9646	GO:0005515|GO:0033523|GO:0080182|GO:0000993|GO:0035327|GO:0000122|GO:0007259|GO:0001711|GO:0006351|GO:0071222|GO:0051571|GO:0016607|GO:0045638|GO:0045944|GO:0019827|GO:0032968|GO:2001162|GO:0016593|GO:0070102|GO:0016055|GO:0042169|GO:0010390	10800965	chr11	10800906	+	hs|11p15.3	NM_014633	chr11:10800906-10800965	NM_014633	Hs.725151
A_24_P183150	2.79686	1.48381	2.79686	up	CXCL3	chemokine (C-X-C motif) ligand 3	FALSE	Homo sapiens chemokine (C-X-C motif) ligand 3 (CXCL3), mRNA [NM_002090]	2921	GO:0008009|GO:0006955|GO:0070098|GO:0006954|GO:0007186|GO:0042127|GO:0030593|GO:0032496|GO:0005576|GO:0045236|GO:0005615|GO:0002690	74902761	chr4	74902702	-	hs|4q13.3	NM_002090	chr4:74902761-74902702	NM_002090	Hs.89690
A_23_P166508	2.78344	1.47687	2.78344	up	LINC01315	long intergenic non-protein coding RNA 1315	FALSE	Homo sapiens long intergenic non-protein coding RNA 1315 (LINC01315), transcript variant 1, long non-coding RNA [NR_120595]	102723775		42760626	chr22	42760567	-	hs|22q13.2	NR_120595	chr22:42760626-42760567	NR_120595	Hs.335413
A_23_P137689	3.60813	1.85125	3.60813	up	OLFML2B	olfactomedin-like 2B	FALSE	Homo sapiens olfactomedin-like 2B (OLFML2B), transcript variant 2, mRNA [NM_015441]	25903	GO:0005576	161953276	chr1	161953217	-	hs|1q23.3	NM_015441	chr1:161953276-161953217	NM_015441	Hs.507515
A_24_P382187	2.13606	1.09495	2.13606	up	IGFBP4	insulin-like growth factor binding protein 4	FALSE	Homo sapiens insulin-like growth factor binding protein 4 (IGFBP4), mRNA [NM_001552]	3487	GO:0008283|GO:0031994|GO:0031995|GO:0005576|GO:0006259|GO:0001558|GO:0005615|GO:0010906|GO:0007165|GO:0001501|GO:0044342|GO:0006954|GO:0043568|GO:0043567|GO:0043410|GO:0044267	38613367	chr17	38613308	+	hs|17q21.2	NM_001552	chr17:38613308-38613367	NM_001552	Hs.462998
A_23_P138975	4.0366	2.01314	4.0366	up	RBM7	RNA binding motif protein 7	FALSE	Homo sapiens RNA binding motif protein 7 (RBM7), transcript variant 2, mRNA [NM_016090]	10179	GO:0051321|GO:0000166|GO:0005654|GO:0005634	114279009	chr11	114278950	+	hs|11q23.2	NM_016090	chr11:114278950-114279009	NM_016090	Hs.7527
A_33_P3255434	2.55692	1.35441	2.55692	up	MEG3	maternally expressed 3 (non-protein coding)	FALSE	Homo sapiens maternally expressed 3 (non-protein coding) (MEG3), transcript variant 1, long non-coding RNA [NR_002766]	55384		101327345	chr14	101327286	+	hs|14q32.2	NR_002766	chr14:101327286-101327345	NR_002766	Hs.654863
A_33_P3290124	2.08687	1.06134	2.08687	up	ASB10	ankyrin repeat and SOCS box containing 10	FALSE	Homo sapiens ankyrin repeat and SOCS box containing 10 (ASB10), transcript variant 1, mRNA [NM_001142459]	136371	GO:0035556|GO:0005737|GO:0016567|GO:0005634	150872848	chr7	150872789	-	hs|7q36.1	NM_001142459	chr7:150872848-150872789	NM_001142459	Hs.647081
A_21_P0005609	5.48283	2.45492	5.48283	up	KMT2E-AS1	KMT2E antisense RNA 1 (head to head)	FALSE	Homo sapiens KMT2E antisense RNA 1 (head to head) (KMT2E-AS1), long non-coding RNA [NR_024586]	100216545		104653762	chr7	104653703	-	hs|7q22.3		chr7:104653762-104653703	NR_024586	Hs.631150
A_23_P75255	2.1213	1.08495	2.1213	up	VPS26A	vacuolar protein sorting 26 homolog A (S. pombe)	FALSE	Homo sapiens vacuolar protein sorting 26 homolog A (S. pombe) (VPS26A), transcript variant 1, mRNA [NM_004896]	9559	GO:0005515|GO:0008565|GO:0042147|GO:0031982|GO:0006886|GO:0010008|GO:0005769|GO:0070062|GO:0043231|GO:0030904|GO:0005829|GO:0005768	70932018	chr10	70931959	+	hs|10q22.1	NM_004896	chr10:70931959-70932018	NM_004896	Hs.499925
A_32_P191084	2.33019	1.22045	2.33019	up	KCTD5	potassium channel tetramerization domain containing 5	FALSE	Homo sapiens potassium channel tetramerization domain containing 5 (KCTD5), mRNA [NM_018992]	54442	GO:0005515|GO:0016032|GO:0051260|GO:0005634|GO:0032403|GO:0005829	2758704	chr16	2758645	+	hs|16p13.3	NM_018992	chr16:2758645-2758704	NM_018992	Hs.61960
A_24_P130936	2.50781	1.32643	2.50781	up	DDX3Y	DEAD (Asp-Glu-Ala-Asp) box helicase 3, Y-linked	FALSE	Homo sapiens DEAD (Asp-Glu-Ala-Asp) box helicase 3, Y-linked (DDX3Y), transcript variant 2, mRNA [NM_004660]	8653	GO:0005737|GO:0016020|GO:0003723|GO:0008152|GO:0004386|GO:0005634|GO:0005524|GO:0003677	15027921	chrY	15027862	+	hs|Yq11.21	NM_004660	chrY:15027862-15027921	NM_004660	Hs.99120
A_23_P30884	2.10452	1.07349	2.10452	up	CLIC1	chloride intracellular channel 1	FALSE	Homo sapiens chloride intracellular channel 1 (CLIC1), transcript variant 2, mRNA [NM_001288]	1192	GO:0005515|GO:0006821|GO:0048471|GO:0031965|GO:0005244|GO:0005886|GO:0051881|GO:0034707|GO:0072562|GO:0005634|GO:0005635|GO:0031982|GO:0005254|GO:0005615|GO:0070527|GO:0045669|GO:0005739|GO:0005903|GO:0007165|GO:0005737|GO:0016020|GO:0051726|GO:0034765|GO:0070062	31700105	chr6	31700046	-	hs|6p21.33	NM_001288	chr6:31700105-31700046	NM_001288	Hs.414565
A_33_P3266396	2.15933	1.11058	2.15933	up	CPTP	ceramide-1-phosphate transfer protein	FALSE	Homo sapiens ceramide-1-phosphate transfer protein (CPTP), mRNA [NM_001029885]	80772	GO:0005640|GO:0051861|GO:0005794|GO:0005543|GO:0005886|GO:0046836|GO:0005548|GO:0010008|GO:0005829	1264264	chr1	1264205	+	hs|1p36.33	NM_001029885	chr1:1264205-1264264	NM_001029885	Hs.515689
A_23_P216468	2.63533	1.39798	2.63533	up	SLC1A1	solute carrier family 1 (neuronal/epithelial high affinity glutamate transporter, system Xag), member 1	FALSE	Homo sapiens solute carrier family 1 (neuronal/epithelial high affinity glutamate transporter, system Xag), member 1 (SLC1A1), mRNA [NM_004170]	6505	GO:0015501|GO:0005886|GO:0051938|GO:0070779|GO:0005313|GO:0007268|GO:0055085|GO:0016324|GO:0016020|GO:0042883|GO:0005887|GO:0051260|GO:0016595|GO:0017153|GO:0070062|GO:0006811|GO:0033229	4587061	chr9	4587002	+	hs|9p24.2	NM_004170	chr9:4587002-4587061	NM_004170	Hs.444915
A_23_P8416	3.18874	1.67299	3.18874	up	GALNT11	polypeptide N-acetylgalactosaminyltransferase 11	FALSE	Homo sapiens polypeptide N-acetylgalactosaminyltransferase 11 (GALNT11), mRNA [NM_022087]	63917	GO:0007368|GO:0007220|GO:0005112|GO:0016266|GO:0046872|GO:0061314|GO:0004653|GO:0000139|GO:0006493|GO:0060271|GO:0030246|GO:0018243|GO:0016021|GO:0044267|GO:0008593|GO:0043687	151817986	chr7	151817927	+	hs|7q36.1	NM_022087	chr7:151817927-151817986	NM_022087	Hs.647109
A_24_P362969	10.6868	3.41775	10.6868	up	HSD17B13	hydroxysteroid (17-beta) dehydrogenase 13	FALSE	Homo sapiens hydroxysteroid (17-beta) dehydrogenase 13 (HSD17B13), transcript variant A, mRNA [NM_178135]	345275	GO:0005811|GO:0046889|GO:0008150|GO:0003674|GO:0016491|GO:0005576|GO:0005575|GO:0055114	88225833	chr4	88225774	-	hs|4q22.1	NM_178135	chr4:88225833-88225774	NM_178135	Hs.284414
A_32_P180958	2.62049	1.38984	2.62049	up	PCYOX1	prenylcysteine oxidase 1	FALSE	Homo sapiens prenylcysteine oxidase 1 (PCYOX1), mRNA [NM_016297]	51449	GO:0034361|GO:0001735|GO:0005886|GO:0008555|GO:0030329|GO:0030328|GO:0030327|GO:0005764|GO:0070062|GO:0055114	70508035	chr2	70507976	+	hs|2p13.3	NM_016297	chr2:70507976-70508035	NM_016297	Hs.567502
A_24_P12401	6.84474	2.775	6.84474	up	VEGFA	vascular endothelial growth factor A	FALSE	Homo sapiens vascular endothelial growth factor A (VEGFA), transcript variant 1, mRNA [NM_001025366]	7422	GO:0005515|GO:0008360|GO:0038033|GO:0005615|GO:0038084|GO:0030335|GO:0009986|GO:0030168|GO:0000122|GO:0005161|GO:0042056|GO:0005125|GO:0001701|GO:0031077|GO:0002575|GO:0010595|GO:0038091|GO:0040007|GO:0005172|GO:0008083|GO:0030949|GO:0035924|GO:0008284|GO:0035767|GO:0030324|GO:0002042|GO:0003169|GO:0032147|GO:0033138|GO:0001541|GO:0005737|GO:0031334|GO:0030855|GO:0030225|GO:0031093|GO:0030224|GO:…	43753570	chr6	43753511	+	hs|6p21.1	NM_001025366	chr6:43753511-43753570	NM_001025366	Hs.73793
A_23_P118690	3.08733	1.62636	3.08733	up	ZNF207	zinc finger protein 207	FALSE	Homo sapiens zinc finger protein 207 (ZNF207), transcript variant 2, mRNA [NM_001032293]	7756	GO:0005515|GO:0008017|GO:0007094|GO:0006355|GO:0003700|GO:0005874|GO:0051983|GO:0050821|GO:0005730|GO:0005634|GO:0003677|GO:0000070|GO:0000777|GO:0000776|GO:0008270|GO:0008608|GO:0008201|GO:0051301	30697015	chr17	30696956	+	hs|17q11.2	NM_001032293	chr17:30696956-30697015	NM_001032293	Hs.500775
A_33_P3402474	2.35555	1.23607	2.35555	up	ATAT1	alpha tubulin acetyltransferase 1	FALSE	Homo sapiens alpha tubulin acetyltransferase 1 (ATAT1), transcript variant 1, mRNA [NM_001031722]	79969	GO:0072686|GO:0021542|GO:0030424|GO:0050662|GO:0006996|GO:0045598|GO:1900227|GO:0007283|GO:0005829|GO:0070507|GO:0005905|GO:0019799|GO:0071929|GO:0048666|GO:0005925	30614574	chr6	30614515	+	hs|6p21.33	NM_001031722	chr6:30614515-30614574	NM_001031722	Hs.654798
A_23_P200829	2.72151	1.44441	2.72151	up	SRGAP2	SLIT-ROBO Rho GTPase activating protein 2	FALSE	Homo sapiens SLIT-ROBO Rho GTPase activating protein 2 (SRGAP2), transcript variant 1, mRNA [NM_015326]	23380	GO:0005515|GO:0030054|GO:0005886|GO:0008283|GO:0007264|GO:0005634|GO:0032855|GO:0042803|GO:0005829|GO:0051014|GO:0005737|GO:0007411|GO:0045211|GO:0060548|GO:0034446|GO:0060996|GO:0046847|GO:0030675|GO:0051056|GO:2001223|GO:0003363|GO:0014069|GO:0044327|GO:0030027|GO:0021816|GO:0045335|GO:0048365|GO:0048812	206637615	chr1	206637556	+	hs|1q32.1	NM_015326	chr1:206637556-206637615	NM_015326	Hs.497575
A_23_P8640	2.02586	1.01854	2.02586	up	GPER1	G protein-coupled estrogen receptor 1	FALSE	Homo sapiens G protein-coupled estrogen receptor 1 (GPER1), transcript variant 3, mRNA [NM_001039966]	2852	GO:0005802|GO:0005515|GO:0030054|GO:0045599|GO:0019228|GO:0005622|GO:0032024|GO:0005496|GO:0048786|GO:0045745|GO:0005794|GO:0030335|GO:0031966|GO:0045742|GO:0004930|GO:0014069|GO:0014068|GO:0044327|GO:0043280|GO:0042734|GO:0007049|GO:0007186|GO:0005887|GO:0045087|GO:0005789|GO:0030263|GO:0030264|GO:0032962|GO:0001956|GO:0030424|GO:0048471|GO:0008284|GO:0008285|GO:0005886|GO:0005783|GO:0030819|GO:…	1133395	chr7	1133336	+	hs|7p22.3	NM_001039966	chr7:1133336-1133395	NM_001039966	Hs.20961
A_23_P206759	2.83889	1.50533	2.83889	up	IST1	increased sodium tolerance 1 homolog (yeast)	FALSE	Homo sapiens increased sodium tolerance 1 homolog (yeast) (IST1), transcript variant 2, mRNA [NM_014761]	9798	GO:0005515|GO:0019076|GO:0005793|GO:0005813|GO:0019904|GO:0030496|GO:0046745|GO:0032403|GO:0045862|GO:0048672|GO:0005829|GO:0009838|GO:0045184|GO:0000910|GO:0008104|GO:0016023|GO:0070062|GO:0051301	71961823	chr16	71961764	+	hs|16q22.2	NM_014761	chr16:71961764-71961823	NM_014761	Hs.232194
A_23_P14708	2.49239	1.31753	2.49239	up	ZNF280D	zinc finger protein 280D	FALSE	Homo sapiens zinc finger protein 280D (ZNF280D), transcript variant 1, mRNA [NM_017661]	54816	GO:0006355|GO:0005634|GO:0003677|GO:0046872|GO:0006351	56923077	chr15	56923018	-	hs|15q21.3	NM_017661	chr15:56923077-56923018	NM_017661	Hs.511477
A_33_P3305467	2.11563	1.08109	2.11563	up			FALSE	ADAMTS7 pseudogene 3 [Source:HGNC Symbol;Acc:HGNC:49409] [ENST00000566116]			78285306	chr15	78285247	+	hs|15q24.3		chr15:78285247-78285306
A_23_P427023	2.31179	1.20901	2.31179	up	GIMAP1	GTPase, IMAP family member 1	FALSE	Homo sapiens GTPase, IMAP family member 1 (GIMAP1), mRNA [NM_130759]	170575	GO:0030217|GO:0000139|GO:0030183|GO:0005789|GO:0016021|GO:0005525	150418151	chr7	150418092	+	hs|7q36.1	NM_130759	chr7:150418092-150418151	NM_130759	Hs.647079
A_33_P6814866	3.22229	1.68809	3.22229	up	lnc-GTF2F2-2	lnc-GTF2F2-2:22	FALSE	Homo sapiens cDNA FLJ45662 fis, clone CTONG2027150. [AK127569]			45965169	chr13	45964981	+	hs|13q14.13	AK127569	chr13:45964981-45965169		Hs.375766
A_21_P0000558	7.61685	2.92919	7.61685	up	BRE-AS1	BRE antisense RNA 1	FALSE	Homo sapiens BRE antisense RNA 1 (BRE-AS1), long non-coding RNA [NR_028308]	100302650		28112468	chr2	28112409	-	hs|2p23.2	NR_028308	chr2:28112468-28112409	NR_028308	Hs.729719
A_23_P73632	5.89573	2.55967	5.89573	up	NR0B1	nuclear receptor subfamily 0, group B, member 1	FALSE	Homo sapiens nuclear receptor subfamily 0, group B, member 1 (NR0B1), mRNA [NM_000475]	190	GO:0005515|GO:0008406|GO:0010467|GO:0006694|GO:0006367|GO:0030325|GO:0003723|GO:0021983|GO:0035258|GO:0033144|GO:0003707|GO:0050682|GO:0005634|GO:0007283|GO:0043433|GO:0042803|GO:0060008|GO:0005737|GO:0008104|GO:0042788|GO:0030238|GO:0043401|GO:0004879|GO:0035902|GO:0003714|GO:0019904|GO:0032448|GO:0000122|GO:0021854|GO:0003677|GO:0043565|GO:0016020|GO:0033327|GO:0005654|GO:0045596|GO:0045892|GO:…	30322698	chrX	30322639	-	hs|Xp21.2	NM_000475	chrX:30322698-30322639	NM_000475	Hs.268490
A_23_P361014	2.54113	1.34547	2.54113	up	TSHZ3	teashirt zinc finger homeobox 3	FALSE	Homo sapiens teashirt zinc finger homeobox 3 (TSHZ3), mRNA [NM_020856]	57616	GO:0001656|GO:0005515|GO:0001657|GO:0030324|GO:0005634|GO:0072105|GO:0001701|GO:0003677|GO:0046872|GO:0006351|GO:0072193|GO:0030426|GO:0005739|GO:0002087|GO:0050881|GO:0072195|GO:0003682|GO:0060993|GO:0051152|GO:0050975|GO:0005654|GO:0045892	31765938	chr19	31765879	-	hs|19q12	NM_020856	chr19:31765938-31765879	NM_020856	Hs.278436
A_23_P69141	2.55959	1.35591	2.55959	up	DYNC1LI1	dynein, cytoplasmic 1, light intermediate chain 1	FALSE	Homo sapiens dynein, cytoplasmic 1, light intermediate chain 1 (DYNC1LI1), mRNA [NM_016141]	51143	GO:0005813|GO:0005886|GO:0005874|GO:0090267|GO:0003777|GO:0005524|GO:0000922|GO:0005737|GO:0007067|GO:0016020|GO:0008152|GO:0000777|GO:0006810|GO:0016032|GO:0000776|GO:0005868|GO:0051301|GO:0007018	32567461	chr3	32567450	-	hs|3p22.3	NM_016141	chr3:32567461-32567450	NM_016141	Hs.529495
A_24_P168925	3.01142	1.59044	3.01142	up	CHRDL1	chordin-like 1	FALSE	Homo sapiens chordin-like 1 (CHRDL1), transcript variant 1, mRNA [NM_001143981]	91851	GO:0030514|GO:0048749|GO:0001503|GO:0030182|GO:0001654|GO:0005576|GO:0030509	109917279	chrX	109917220	-	hs|Xq23	NM_001143981	chrX:109917279-109917220	NM_001143981	Hs.496587
A_23_P43326	2.43326	1.28289	2.43326	up	SPTLC1	serine palmitoyltransferase, long chain base subunit 1	FALSE	Homo sapiens serine palmitoyltransferase, long chain base subunit 1 (SPTLC1), transcript variant 1, mRNA [NM_006415]	10558	GO:0005515|GO:0006665|GO:0004758|GO:0006686|GO:0030148|GO:0035339|GO:0044281|GO:0030170|GO:0005789|GO:0016021|GO:0046513|GO:0017059|GO:0046512|GO:0046511	94793776	chr9	94793717	-	hs|9q22.31	NM_006415	chr9:94793776-94793717	NM_006415	Hs.90458
A_23_P123866	3.38834	1.76058	3.38834	up	UBAP1	ubiquitin associated protein 1	FALSE	Homo sapiens ubiquitin associated protein 1 (UBAP1), transcript variant 1, mRNA [NM_016525]	51271	GO:0043130|GO:0005737|GO:0005794|GO:0000813|GO:0005886|GO:0015031|GO:0043162|GO:0005829	34252041	chr9	34251982	+	hs|9p13.3	NM_016525	chr9:34251982-34252041	NM_016525	Hs.268963
A_22_P00018520	3.90604	1.96571	3.90604	up	A2MP1	alpha-2-macroglobulin pseudogene 1	FALSE	Homo sapiens alpha-2-macroglobulin pseudogene 1 (A2MP1), non-coding RNA [NR_040112]	3		9381240	chr12	9381181	-	hs|12p13.31	NR_040112	chr12:9381240-9381181	NR_040112	Hs.569125
A_24_P8371	2.52	1.33343	2.52	up	SPNS2	spinster homolog 2 (Drosophila)	FALSE	Homo sapiens spinster homolog 2 (Drosophila) (SPNS2), mRNA [NM_001124758]	124976	GO:0006665|GO:0001782|GO:0046624|GO:0003376|GO:0072676|GO:0005765|GO:0055085|GO:0031982|GO:0048535|GO:0040011|GO:0060348|GO:0048073|GO:0006869|GO:0002920|GO:0016021|GO:0043029	4442306	chr17	4442247	+	hs|17p13.2	NM_001124758	chr17:4442247-4442306	NM_001124758	Hs.22824
A_33_P3226212	2.85621	1.5141	2.85621	up	JAM2	junctional adhesion molecule 2	FALSE	Homo sapiens junctional adhesion molecule 2 (JAM2), transcript variant 3, mRNA [NM_001270408]	58494	GO:0005515|GO:0016337|GO:0007162|GO:0046982|GO:0005886|GO:0030198|GO:0007596|GO:0005887|GO:0005923|GO:0050900	27078397	chr21	27078338	+	hs|21q21.3	NM_001270408	chr21:27078338-27078397	NM_001270408	Hs.517227
A_23_P56734	2.13358	1.09327	2.13358	up	HNMT	histamine N-methyltransferase	FALSE	Homo sapiens histamine N-methyltransferase (HNMT), transcript variant 1, mRNA [NM_006895]	3176	GO:0035902|GO:0043005|GO:0007585|GO:0002347|GO:0046539|GO:0051384|GO:0006972|GO:0014075|GO:0042220|GO:0032259|GO:0005737|GO:0007420|GO:0005654|GO:0070555|GO:0070062	138771537	chr2	138771478	+	hs|2q22.1	NM_006895	chr2:138771478-138771537	NM_006895	Hs.42151
A_33_P3276455	2.26419	1.17899	2.26419	up	KDM5B	lysine (K)-specific demethylase 5B	FALSE	Homo sapiens lysine (K)-specific demethylase 5B (KDM5B), mRNA [NM_006618]	10765	GO:0005515|GO:0003700|GO:0003714|GO:0006325|GO:0005634|GO:0003677|GO:0006351|GO:0034720|GO:0005737|GO:0034721|GO:0034648|GO:0034647|GO:0016706|GO:0005654|GO:0008270|GO:0048511|GO:0045892|GO:0055114	202710744	chr1	202710685	-	hs|1q32.1	NM_006618	chr1:202710744-202710685	NM_006618	Hs.443650
A_22_P00014262	4.72174	2.23932	4.72174	up	lnc-SEMA6C-1	lnc-SEMA6C-1:1	FALSE	LNCipedia lincRNA (lnc-SEMA6C-1), lincRNA [lnc-SEMA6C-1:1]			151102683	chr1	151102624	-	hs|1q21.3		chr1:151102683-151102624
A_23_P83134	2.53874	1.34411	2.53874	up	GAS1	growth arrest-specific 1	FALSE	Homo sapiens growth arrest-specific 1 (GAS1), mRNA [NM_002048]	2619	GO:0005515|GO:0035924|GO:0030308|GO:0005886|GO:0060628|GO:0050680|GO:0048592|GO:0045879|GO:0048701|GO:0045880|GO:0048589|GO:0007411|GO:2001240|GO:0042476|GO:0060021|GO:0021904|GO:0007050|GO:0042474|GO:0043010|GO:0042473|GO:0046658|GO:0050679|GO:0021587|GO:0002053|GO:0042981|GO:0012501|GO:0045165|GO:0008589|GO:0045930|GO:0016021|GO:0010955|GO:0042733	89559953	chr9	89559894	-	hs|9q21.33	NM_002048	chr9:89559953-89559894	NM_002048	Hs.65029
A_23_P70968	2.1718	1.11889	2.1718	up	HOXA7	homeobox A7	FALSE	Homo sapiens homeobox A7 (HOXA7), mRNA [NM_006896]	3204	GO:0048704|GO:0005634|GO:0000122|GO:0001525|GO:0000978|GO:0009952|GO:0006351|GO:0048863|GO:0043565|GO:0045617|GO:0001077|GO:0045656|GO:0045944|GO:0002686|GO:0045892|GO:0001953|GO:0008134	27194490	chr7	27194431	-	hs|7p15.2	NM_006896	chr7:27194490-27194431	NM_006896	Hs.610216
A_24_P282578	2.01982	1.01423	2.01982	up	SSR2	signal sequence receptor, beta (translocon-associated protein beta)	FALSE	Homo sapiens signal sequence receptor, beta (translocon-associated protein beta) (SSR2), mRNA [NM_003145]	6746	GO:0010467|GO:0005783|GO:0006614|GO:0006613|GO:0005789|GO:0016021|GO:0044267|GO:0006412	155988133	chr1	155988074	-	hs|1q22	NM_003145	chr1:155988133-155988074	NM_003145	Hs.74564
A_24_P12539	3.48418	1.80082	3.48418	up	KBTBD2	kelch repeat and BTB (POZ) domain containing 2	FALSE	Homo sapiens kelch repeat and BTB (POZ) domain containing 2 (KBTBD2), mRNA [NM_015483]	25948		32908505	chr7	32908446	-	hs|7p14.3	NM_015483	chr7:32908505-32908446	NM_015483	Hs.372541
A_24_P37519	2.70563	1.43596	2.70563	up	LZTFL1	leucine zipper transcription factor-like 1	FALSE	Homo sapiens leucine zipper transcription factor-like 1 (LZTFL1), transcript variant 1, mRNA [NM_020347]	54585	GO:0005515|GO:0034464|GO:0006996|GO:0072594|GO:0032403|GO:0042802|GO:0005829	45866096	chr3	45866037	-	hs|3p21.31	NM_020347	chr3:45866096-45866037	NM_020347	Hs.30824
A_23_P164436	2.67826	1.4213	2.67826	up	ASPA	aspartoacylase	FALSE	Homo sapiens aspartoacylase (ASPA), transcript variant 1, mRNA [NM_000049]	443	GO:0005515|GO:0005737|GO:0019807|GO:0022010|GO:0006533|GO:0048714|GO:0016788|GO:0005634|GO:0004046|GO:0046872|GO:0070062	3402515	chr17	3402456	+	hs|17p13.2	NM_000049	chr17:3402456-3402515	NM_000049	Hs.171142
A_23_P6891	2.55157	1.35138	2.55157	up	EIF1B	eukaryotic translation initiation factor 1B	FALSE	Homo sapiens eukaryotic translation initiation factor 1B (EIF1B), mRNA [NM_005875]	10289	GO:0006446|GO:0003743|GO:0005575|GO:0006413	40353713	chr3	40353654	+	hs|3p22.1	NM_005875	chr3:40353654-40353713	NM_005875	Hs.315230
A_21_P0013575	2.04956	1.03531	2.04956	up	XLOC_l2_014821		FALSE	BROAD Institute lincRNA (XLOC_l2_014821), lincRNA [TCONS_l2_00028768]			67333549	chr9	67333490	+	hs|9q13		chr9:67333490-67333549
A_23_P141965	2.1547	1.10749	2.1547	up	HAUS8	HAUS augmin-like complex, subunit 8	FALSE	Homo sapiens HAUS augmin-like complex, subunit 8 (HAUS8), transcript variant 1, mRNA [NM_033417]	93323	GO:0051297|GO:0003674|GO:0007067|GO:0005813|GO:0005737|GO:0000922|GO:0005874|GO:0070652|GO:0051225|GO:0051301	17160709	chr19	17160650	-	hs|19p13.11	NM_033417	chr19:17160709-17160650	NM_033417	Hs.404088
A_23_P170839	2.60762	1.38274	2.60762	up	2017-09-02	septin 2	FALSE	Homo sapiens septin 2 (SEPT2), transcript variant 1, mRNA [NM_001008491]	4735	GO:0005515|GO:0060170|GO:0048471|GO:0045202|GO:0005634|GO:0015629|GO:0032154|GO:0031175|GO:0007224|GO:0032880|GO:0005737|GO:0000145|GO:0035869|GO:0030234|GO:0005938|GO:0070062|GO:0005819|GO:0005730|GO:0030496|GO:0002036|GO:0005525|GO:0042384|GO:0007067|GO:0032947|GO:0050790|GO:0000777|GO:0005654|GO:0051301	242293066	chr2	242293007	+	hs|2q37.3	NM_001008491	chr2:242293007-242293066	NM_001008491	Hs.721234
A_33_P3253960	2.04561	1.03253	2.04561	up	DHRS11	dehydrogenase/reductase (SDR family) member 11	FALSE	dehydrogenase/reductase (SDR family) member 11 [Source:HGNC Symbol;Acc:HGNC:28639] [ENST00000610443]	79154	GO:0016491|GO:0005576|GO:0055114	34953442	chr17	34953383	+	hs|17q12	AB209247	chr17:34953383-34953442
A_23_P78802	2.14376	1.10015	2.14376	up	PRKD2	protein kinase D2	FALSE	Homo sapiens protein kinase D2 (PRKD2), transcript variant 1, mRNA [NM_016457]	25865	GO:0005515|GO:0050852|GO:0008219|GO:0030949|GO:0035924|GO:0005886|GO:2000573|GO:0038033|GO:0005634|GO:0046872|GO:0032757|GO:0035556|GO:0051091|GO:0005737|GO:0033138|GO:0051092|GO:0046777|GO:0018105|GO:0045944|GO:0070374|GO:0007155|GO:0048010|GO:0005794|GO:0045743|GO:0032743|GO:0001525|GO:0050862|GO:0005524|GO:0045766|GO:0045785|GO:0010595|GO:0043536|GO:0032793|GO:0004672|GO:0001938|GO:0061154|GO:…	47181758	chr19	47181699	-	hs|19q13.32	NM_016457	chr19:47181758-47181699	NM_016457	Hs.466987
A_23_P141992	2.47716	1.30869	2.47716	up	HSD11B1L	hydroxysteroid (11-beta) dehydrogenase 1-like	FALSE	Homo sapiens hydroxysteroid (11-beta) dehydrogenase 1-like (HSD11B1L), transcript variant b, mRNA [NM_198706]	374875	GO:0016491|GO:0005576|GO:0055114	5688243	chr19	5688184	+	hs|19p13.3	NM_198706	chr19:5688184-5688243	NM_198706	Hs.631840
A_23_P335452	2.45701	1.2969	2.45701	up	ZCCHC24	zinc finger, CCHC domain containing 24	FALSE	Homo sapiens zinc finger, CCHC domain containing 24 (ZCCHC24), mRNA [NM_153367]	219654	GO:0008270	81142503	chr10	81142444	-	hs|10q22.3	NM_153367	chr10:81142503-81142444	NM_153367	Hs.523080
A_24_P156288	4.94128	2.30489	4.94128	up	GZF1	GDNF-inducible zinc finger protein 1	FALSE	Homo sapiens GDNF-inducible zinc finger protein 1 (GZF1), mRNA [NM_022482]	64412	GO:0001658|GO:0005794|GO:0001206|GO:0005730|GO:0005634|GO:0000122|GO:0000978|GO:0046872|GO:0006351|GO:0043565|GO:0001078|GO:0005737|GO:0000980|GO:0005654|GO:0045892	23352486	chr20	23352427	+	hs|20p11.21	NM_022482	chr20:23352427-23352486	NM_022482	Hs.709462
A_33_P3231814	3.05855	1.61285	3.05855	up			FALSE	Homo sapiens cDNA clone IMAGE:4801360. [BC030764]			91805273	chr2	91805214	-	hs|2p11.1		chr2:91805273-91805214		Hs.469287
A_21_P0005735	3.26331	1.70634	3.26331	up	LOC101926956	uncharacterized LOC101926956	FALSE	PREDICTED: Homo sapiens uncharacterized LOC101926956 (LOC101926956), transcript variant X1, ncRNA [XR_242403]	101926956		93695594	chr8	93695535	+	hs|8q22.1	XR_242403	chr8:93695535-93695594	XR_242403
A_24_P145911	2.05051	1.03598	2.05051	up	TRA2B	transformer 2 beta homolog (Drosophila)	FALSE	transformer 2 beta homolog (Drosophila) [Source:HGNC Symbol;Acc:HGNC:10781] [ENST00000342294]	6434	GO:0048026|GO:0005515|GO:0000166|GO:0000398|GO:0000381|GO:0000375|GO:0005634|GO:0003729	185649620	chr3	185649561	-	hs|3q27.2	XM_006713724	chr3:185649620-185649561	XM_006713724	Hs.533122
A_19_P00320362	2.03972	1.02837	2.03972	up	NBAT1	neuroblastoma associated transcript 1	FALSE	Homo sapiens neuroblastoma associated transcript 1 (NBAT1), long non-coding RNA [NR_034143]	729177		22136652	chr6	22136593	-	hs|6p22.3	NR_034143	chr6:22136652-22136593	NR_034143	Hs.730673
A_23_P40039	2.59294	1.37459	2.59294	up	AMMECR1L	AMMECR1-like	FALSE	Homo sapiens AMMECR1-like (AMMECR1L), transcript variant 1, mRNA [NM_031445]	83607		128619399	chr2	128619340	-	hs|2q14.3	NM_031445	chr2:128619399-128619340	NM_031445	Hs.546449
A_21_P0006183	4.97899	2.31585	4.97899	up	lnc-ZNF169-1	lnc-ZNF169-1:1	FALSE	Q5VZR4_HUMAN (Q5VZR4) Hippocampus abundant gene transcript-like 2, partial (72%) [THC2561726]			97076850	chr9	97076791	+	hs|9q22.32		chr9:97076791-97076850
A_23_P384748	2.68162	1.4231	2.68162	up	PLEKHH2	pleckstrin homology domain containing, family H (with MyTH4 domain) member 2	FALSE	Homo sapiens pleckstrin homology domain containing, family H (with MyTH4 domain) member 2 (PLEKHH2), mRNA [NM_172069]	130271	GO:0030835|GO:0005737|GO:0005886|GO:0003779|GO:0030864|GO:0030027|GO:0042802	43994752	chr2	43994693	+	hs|2p21	NM_172069	chr2:43994693-43994752	NM_172069	Hs.164162
A_33_P3405946	2.17674	1.12217	2.17674	up	RBM39	RNA binding motif protein 39	FALSE	Homo sapiens RNA binding motif protein 39 (RBM39), transcript variant 1, mRNA [NM_184234]	9584	GO:0008380|GO:0006397|GO:0005515|GO:0006396|GO:0006355|GO:0016607|GO:0005815|GO:0000166|GO:0015630|GO:0005654|GO:0006351	34292455	chr20	34292396	-	hs|20q11.22	NM_184234	chr20:34292455-34292396	NM_184234	Hs.282901
A_33_P3349414	2.16314	1.11313	2.16314	up	ZBTB43	zinc finger and BTB domain containing 43	FALSE	Homo sapiens zinc finger and BTB domain containing 43 (ZBTB43), transcript variant 1, mRNA [NM_014007]	23099	GO:0006355|GO:0005634|GO:0003677|GO:0046872|GO:0006351	129597501	chr9	129597442	+	hs|9q33.3	NM_014007	chr9:129597442-129597501	NM_014007	Hs.355581
A_33_P3375710	4.06257	2.02239	4.06257	up	lnc-VAMP3-1	lnc-VAMP3-1:1	FALSE	PREDICTED: Homo sapiens calmodulin binding transcription activator 1 (CAMTA1), transcript variant X3, mRNA [XM_006710484]			7430299	chr1	7430240	+	hs|1p36.23	XM_006710484	chr1:7430240-7430299	XM_006710484
A_23_P32615	2.17517	1.12113	2.17517	up	MNAT1	MNAT CDK-activating kinase assembly factor 1	FALSE	Homo sapiens MNAT CDK-activating kinase assembly factor 1 (MNAT1), transcript variant 1, mRNA [NM_002431]	4331	GO:0005515|GO:0010467|GO:0006368|GO:0006367|GO:0006366|GO:0008283|GO:0006363|GO:0006362|GO:0006361|GO:0006360|GO:0000079|GO:0007512|GO:0005737|GO:0000082|GO:0045944|GO:0000086|GO:0016032|GO:0008094|GO:0043066|GO:0006357|GO:0006370|GO:0048661|GO:0008353|GO:0050434|GO:0051592|GO:0047485|GO:0006281|GO:0006461|GO:0006283|GO:0045814|GO:0021591|GO:0040029|GO:0008270|GO:0005654|GO:0006468|GO:0006289|GO:…	61435355	chr14	61435296	+	hs|14q23.1	NM_002431	chr14:61435296-61435355	NM_002431	Hs.509523
A_23_P49924	2.02598	1.01862	2.02598	up	NT5C3B	5'-nucleotidase, cytosolic IIIB	FALSE	Homo sapiens 5'-nucleotidase, cytosolic IIIB (NT5C3B), transcript variant 1, mRNA [NM_052935]	115024	GO:0005515|GO:0005737|GO:0000287|GO:0000166|GO:0016311|GO:0008253|GO:0009117	39992127	chr17	39991482	-	hs|17q21.2	NM_052935	chr17:39992127-39991482	NM_052935	Hs.237536
A_33_P3373214	2.20229	1.139	2.20229	up	ZHX1-C8orf76	ZHX1-C8orf76 readthrough	FALSE	Homo sapiens ZHX1-C8orf76 readthrough (ZHX1-C8orf76), mRNA [NM_001204180]	100533106		124238498	chr8	124238439	-	hs|8q24.13	NM_001204180	chr8:124238498-124238439	NM_001204180	Hs.707401
A_33_P3420655	2.02272	1.0163	2.02272	up	KDM4A	lysine (K)-specific demethylase 4A	FALSE	Homo sapiens lysine (K)-specific demethylase 4A (KDM4A), mRNA [NM_014663]	9682	GO:0005515|GO:0016577|GO:0005730|GO:0006325|GO:0005634|GO:0035064|GO:0051864|GO:0006351|GO:0070544|GO:0005737|GO:0014898|GO:0016032|GO:0005654|GO:0008270|GO:0045892|GO:0031625|GO:0055114	44171188	chr1	44171129	+	hs|1p34.1	NM_014663	chr1:44171129-44171188	NM_014663	Hs.155983
A_23_P208389	2.40861	1.2682	2.40861	up	AXL	AXL receptor tyrosine kinase	FALSE	Homo sapiens AXL receptor tyrosine kinase (AXL), transcript variant 1, mRNA [NM_021913]	558	GO:0006909|GO:0005515|GO:0051897|GO:0070301|GO:0005886|GO:0035457|GO:0060068|GO:0031100|GO:0034101|GO:0042698|GO:0007283|GO:0097028|GO:0005615|GO:0043524|GO:0006954|GO:0001961|GO:0031668|GO:0034446|GO:0048469|GO:0001779|GO:0032689|GO:0070062|GO:0048010|GO:0046982|GO:0009986|GO:0043277|GO:0030168|GO:0032720|GO:0018108|GO:0032825|GO:2000669|GO:0005524|GO:0007165|GO:0071222|GO:0005887|GO:0001974|GO:…	41767454	chr19	41767395	+	hs|19q13.2	NM_021913	chr19:41767395-41767454	NM_021913	Hs.590970
A_21_P0011814	2.02527	1.01812	2.02527	up	LOC102724689	uncharacterized LOC102724689	FALSE	PREDICTED: Homo sapiens uncharacterized LOC102724689 (LOC102724689), ncRNA [XR_427054]	102724689		87572264	chr2	87572205	-	hs|2p11.2		chr2:87572264-87572205	XR_427054	Hs.710982
A_33_P3294509	2.15084	1.1049	2.15084	up	CD44	CD44 molecule (Indian blood group)	FALSE	Homo sapiens CD44 molecule (Indian blood group) (CD44), transcript variant 1, mRNA [NM_000610]	960	GO:0005515|GO:0001658|GO:0005886|GO:0051216|GO:0005518|GO:0019221|GO:0050731|GO:0044281|GO:0050900|GO:0016323|GO:0033138|GO:0005737|GO:0016337|GO:0005540|GO:0022617|GO:0030198|GO:0034116|GO:0070374|GO:0043154|GO:0016055|GO:1900625|GO:0030203|GO:0070062|GO:0060333|GO:0043066|GO:0005794|GO:0004896|GO:0009986|GO:0005975|GO:0002246|GO:0044344|GO:0035692|GO:0060442|GO:0010628|GO:0007160|GO:0005887|GO:…	35253871	chr11	35253812	+	hs|11p13	NM_000610	chr11:35253812-35253871	NM_000610	Hs.502328
A_23_P211227	2.8414	1.5066	2.8414	up	POFUT2	protein O-fucosyltransferase 2	FALSE	Homo sapiens protein O-fucosyltransferase 2 (POFUT2), transcript variant 3, mRNA [NM_133635]	23275	GO:0010468|GO:0005794|GO:0001707|GO:0051046|GO:0006493|GO:0046922|GO:0005789|GO:0010717|GO:0006004|GO:0036066|GO:0044267|GO:0043687	46684771	chr21	46684712	-	hs|21q22.3	NM_133635	chr21:46684771-46684712	NM_133635	Hs.592164
A_23_P45871	2.99749	1.58375	2.99749	up	IFI44L	interferon-induced protein 44-like	FALSE	Homo sapiens interferon-induced protein 44-like (IFI44L), mRNA [NM_006820]	10964	GO:0051607|GO:0006955|GO:0005737	79107649	chr1	79107590	+	hs|1p31.1	NM_006820	chr1:79107590-79107649	NM_006820	Hs.744918
A_24_P133162	4.34644	2.11983	4.34644	up	STPG1	sperm-tail PG-rich repeat containing 1	FALSE	Homo sapiens sperm-tail PG-rich repeat containing 1 (STPG1), transcript variant 3, mRNA [NM_178122]	90529	GO:0005737|GO:0006915|GO:0005634	24683773	chr1	24683714	-	hs|1p36.11	NM_178122	chr1:24683773-24683714	NM_178122	Hs.403187
A_23_P62920	2.21857	1.14963	2.21857	up	KIFAP3	kinesin-associated protein 3	FALSE	Homo sapiens kinesin-associated protein 3 (KIFAP3), transcript variant 1, mRNA [NM_014970]	22920	GO:0005515|GO:0008285|GO:0016939|GO:0005783|GO:0072383|GO:0036064|GO:0005829|GO:0019886|GO:0008104|GO:0015630|GO:0061024|GO:0005876|GO:0007017|GO:0070062|GO:0007018|GO:0005813|GO:0000794|GO:0043066|GO:0006996|GO:0005794|GO:0005930|GO:0072372|GO:0046587|GO:0007165|GO:0006461|GO:0007596|GO:0032391|GO:0019894|GO:0030990	169890773	chr1	169890714	-	hs|1q24.2	NM_014970	chr1:169890773-169890714	NM_014970	Hs.433442
A_33_P3244951	2.40519	1.26615	2.40519	up	PDE8A	phosphodiesterase 8A	FALSE	Homo sapiens phosphodiesterase 8A (PDE8A), transcript variant 3, mRNA [NM_001243137]	5151	GO:0006355|GO:0000160|GO:0009187|GO:0004115|GO:0004114|GO:0004871|GO:0046872|GO:0070062|GO:0006198|GO:0005829	85682257	chr15	85682198	+	hs|15q25.3	NM_001243137	chr15:85682198-85682257	NM_001243137	Hs.9333
A_23_P51918	4.60142	2.20208	4.60142	up	SEC16B	SEC16 homolog B (S. cerevisiae)	FALSE	Homo sapiens SEC16 homolog B (S. cerevisiae) (SEC16B), mRNA [NM_033127]	89866	GO:0010628|GO:0070863|GO:0000139|GO:0005789|GO:0007031|GO:0048208|GO:0070972|GO:0015031|GO:0007029|GO:0043231|GO:0016559	177898580	chr1	177898521	-	hs|1q25.2	NM_033127	chr1:177898580-177898521	NM_033127	Hs.149540
A_23_P325661	3.08229	1.624	3.08229	up	ZNF134	zinc finger protein 134	FALSE	Homo sapiens zinc finger protein 134 (ZNF134), mRNA [NM_003435]	7693	GO:0006355|GO:0003700|GO:0005634|GO:0003677|GO:0046872|GO:0006351	58133192	chr19	58133133	+	hs|19q13.43	NM_003435	chr19:58133133-58133192	NM_003435	Hs.469694
A_33_P3323068	2.17059	1.11809	2.17059	up	AGPAT4	1-acylglycerol-3-phosphate O-acyltransferase 4	FALSE	Homo sapiens 1-acylglycerol-3-phosphate O-acyltransferase 4 (AGPAT4), mRNA [NM_020133]	56895	GO:0019432|GO:0016024|GO:0005789|GO:0044281|GO:0016021|GO:0008654|GO:0006644|GO:0006654|GO:0003841|GO:0044255|GO:0046474	161587364	chr6	161587305	-	hs|6q26	NM_020133	chr6:161587364-161587305	NM_020133	Hs.353175
A_33_P3217103	2.57685	1.36561	2.57685	up	RBFOX2	RNA binding protein, fox-1 homolog (C. elegans) 2	FALSE	Homo sapiens RNA binding protein, fox-1 homolog (C. elegans) 2 (RBFOX2), transcript variant 1, mRNA [NM_001031695]	23543	GO:0005515|GO:0006397|GO:0008380|GO:0016070|GO:0003714|GO:0003723|GO:0005634|GO:0021942|GO:0003729|GO:0010724|GO:0048813|GO:0005737|GO:0000166|GO:0000381|GO:0042127|GO:0050885|GO:0005654|GO:0045892|GO:0030520|GO:0008134	36140089	chr22	36140030	-	hs|22q12.3	NM_001031695	chr22:36140089-36140030	NM_001031695	Hs.282998
A_33_P3268181	2.10651	1.07486	2.10651	up	LIMS2	LIM and senescent cell antigen-like domains 2	FALSE	Homo sapiens LIM and senescent cell antigen-like domains 2 (LIMS2), transcript variant 5, mRNA [NM_001161404]	55679	GO:2001046|GO:0043066|GO:0016337|GO:2000178|GO:0005886|GO:0034329|GO:2000346|GO:0008270|GO:0005634|GO:0005925|GO:0045216|GO:0005829	128396967	chr2	128396908	-	hs|2q14.3	NM_001161404	chr2:128396967-128396908	NM_001161404	Hs.469881
A_23_P304524	4.02739	2.00985	4.02739	up	DCLK2	doublecortin-like kinase 2	FALSE	Homo sapiens doublecortin-like kinase 2 (DCLK2), transcript variant 1, mRNA [NM_001040260]	166614	GO:0035556|GO:0005737|GO:0004674|GO:0006468|GO:0005856|GO:0005524	151178110	chr4	151178051	+	hs|4q31.3	NM_001040260	chr4:151178051-151178110	NM_001040260	Hs.591683
A_23_P48561	2.3582	1.23769	2.3582	up	EFS	embryonal Fyn-associated substrate	FALSE	Homo sapiens embryonal Fyn-associated substrate (EFS), transcript variant 1, mRNA [NM_005864]	10278	GO:0035556|GO:0017124|GO:0005737|GO:0019904|GO:0007155	23825809	chr14	23825750	-	hs|14q11.2	NM_005864	chr14:23825809-23825750	NM_005864	Hs.24587
A_23_P117782	2.656	1.40926	2.656	up	LARP6	La ribonucleoprotein domain family, member 6	FALSE	Homo sapiens La ribonucleoprotein domain family, member 6 (LARP6), transcript variant 1, mRNA [NM_018357]	55323	GO:0006396|GO:0005737|GO:0000166|GO:0030529|GO:0003723|GO:0005634|GO:0006417	71123971	chr15	71123912	-	hs|15q23	NM_018357	chr15:71123971-71123912	NM_018357	Hs.416755
A_24_P276932	2.47295	1.30624	2.47295	up	ATP6V1C2	ATPase, H+ transporting, lysosomal 42kDa, V1 subunit C2	FALSE	Homo sapiens ATPase, H+ transporting, lysosomal 42kDa, V1 subunit C2 (ATP6V1C2), transcript variant 1, mRNA [NM_001039362]	245973	GO:0008286|GO:0051701|GO:0030177|GO:0033180|GO:0005765|GO:0055085|GO:0005829|GO:0006879|GO:0033572|GO:0008553|GO:0015991|GO:0046983|GO:0090382|GO:0070062	10924301	chr2	10924242	+	hs|2p25.1	NM_001039362	chr2:10924242-10924301	NM_001039362	Hs.580464
A_23_P126008	2.15322	1.10649	2.15322	up	MAST2	microtubule associated serine/threonine kinase 2	FALSE	Homo sapiens microtubule associated serine/threonine kinase 2 (MAST2), mRNA [NM_015112]	23139	GO:0008017|GO:0005515|GO:0005737|GO:0045075|GO:0000287|GO:0005886|GO:0019902|GO:0004674|GO:0015630|GO:0048515|GO:0006468|GO:0005524	46501403	chr1	46501344	+	hs|1p34.1	NM_015112	chr1:46501344-46501403	NM_015112	Hs.319481
A_23_P4096	3.30947	1.7266	3.30947	up	CA4	carbonic anhydrase IV	FALSE	Homo sapiens carbonic anhydrase IV (CA4), mRNA [NM_000717]	762	GO:0005802|GO:0005515|GO:0048471|GO:0005886|GO:0031526|GO:0044281|GO:0048513|GO:0031362|GO:0016323|GO:0016324|GO:0006730|GO:0070062|GO:0030658|GO:0005791|GO:0005793|GO:0005794|GO:0009986|GO:0042493|GO:0004089|GO:0048545|GO:0042383|GO:0016529|GO:0016020|GO:0015701|GO:0008270|GO:0030667	58235686	chr17	58235472	+	hs|17q23.1	NM_000717	chr17:58235472-58235686	NM_000717	Hs.89485
A_23_P120048	2.22297	1.15249	2.22297	up	BAZ2B	bromodomain adjacent to zinc finger domain, 2B	FALSE	Homo sapiens bromodomain adjacent to zinc finger domain, 2B (BAZ2B), transcript variant 1, mRNA [NM_013450]	29994	GO:0005515|GO:0006355|GO:0008270|GO:0005634|GO:0003677|GO:0006351	160175985	chr2	160175926	-	hs|2q24.2	NM_013450	chr2:160175985-160175926	NM_013450	Hs.470369
A_24_P601972	2.1856	1.12803	2.1856	up	C2orf74	chromosome 2 open reading frame 74	FALSE	Homo sapiens chromosome 2 open reading frame 74 (C2orf74), transcript variant 1, mRNA [NM_001143959]	339804	GO:0016021	61390050	chr2	61389991	+	hs|2p15	NM_001143959	chr2:61389991-61390050	NM_001143959	Hs.140617
A_23_P100203	2.00345	1.00249	2.00345	up	HSBP1	heat shock factor binding protein 1	FALSE	Homo sapiens heat shock factor binding protein 1 (HSBP1), mRNA [NM_001537]	3281	GO:0034605|GO:0006936|GO:0003714|GO:0005654|GO:0005634|GO:0000122|GO:0035987|GO:0005856|GO:1900034	83846303	chr16	83846244	+	hs|16q23.3	NM_001537	chr16:83846244-83846303	NM_001537	Hs.250899
A_33_P3821660	2.6029	1.38012	2.6029	up	RABL6	RAB, member RAS oncogene family-like 6	FALSE	Homo sapiens RAB, member RAS oncogene family-like 6 (RABL6), transcript variant 4, mRNA [NM_001173989]	55684	GO:0005515|GO:0005813|GO:0005737|GO:0007264|GO:0005730|GO:0005634|GO:0005525	139726787	chr9	139726728	+	hs|9q34.3	NM_001173989	chr9:139726728-139726787	NM_001173989	Hs.370555
A_24_P148151	2.29869	1.20081	2.29869	up	TSNAX	translin-associated factor X	FALSE	Homo sapiens translin-associated factor X (TSNAX), mRNA [NM_005999]	7257	GO:0010467|GO:0048471|GO:0005794|GO:0005634|GO:0007275|GO:0004521|GO:0007283|GO:0015031|GO:0003677|GO:0046872|GO:0030154|GO:0005829|GO:0043565|GO:0005737|GO:0003697|GO:0008565	231701751	chr1	231701692	+	hs|1q42.2	NM_005999	chr1:231701692-231701751	NM_005999	Hs.13318
A_23_P409386	2.32652	1.21818	2.32652	up	SLC25A22	solute carrier family 25 (mitochondrial carrier: glutamate), member 22	FALSE	Homo sapiens solute carrier family 25 (mitochondrial carrier: glutamate), member 22 (SLC25A22), transcript variant 2, mRNA [NM_024698]	79751	GO:0005739|GO:0015813|GO:0005313|GO:0005743|GO:0005654|GO:0016021|GO:0015293	790555	chr11	790496	-	hs|11p15.5	NM_024698	chr11:790555-790496	NM_024698	Hs.99486
A_23_P257278	4.84999	2.27798	4.84999	up	CDK5RAP1	CDK5 regulatory subunit associated protein 1	FALSE	Homo sapiens CDK5 regulatory subunit associated protein 1 (CDK5RAP1), transcript variant 2, mRNA [NM_016082]	51654	GO:0005737|GO:0051539|GO:0019901|GO:0007420|GO:0045736|GO:0045664|GO:0005575|GO:0032403|GO:0046872|GO:0016740|GO:0006400	31967370	chr20	31967311	-	hs|20q11.21	NM_016082	chr20:31967370-31967311	NM_016082	Hs.435952
A_33_P3310780	2.32366	1.2164	2.32366	up	CTTN	cortactin	FALSE	Homo sapiens cortactin (CTTN), transcript variant 1, mRNA [NM_005231]	2017	GO:0005515|GO:2001237|GO:0005884|GO:0006886|GO:0030426|GO:0006930|GO:0005737|GO:0030516|GO:0030838|GO:0043197|GO:0008076|GO:0048041|GO:0048870|GO:0030041|GO:0005856|GO:0005938|GO:0070062|GO:0031532|GO:0001726|GO:0030027|GO:0006898|GO:0097062|GO:0005905|GO:0048812|GO:0030863|GO:0005925	70282641	chr11	70282582	+	hs|11q13.3	NM_005231	chr11:70282582-70282641	NM_005231	Hs.596164
A_23_P100486	2.09627	1.06782	2.09627	up	VKORC1	vitamin K epoxide reductase complex, subunit 1	FALSE	Homo sapiens vitamin K epoxide reductase complex, subunit 1 (VKORC1), transcript variant 2, mRNA [NM_206824]	79001	GO:0060348|GO:0017187|GO:0048038|GO:0017144|GO:0007596|GO:0005789|GO:0016021|GO:0047057|GO:0044267|GO:0042373|GO:0055114|GO:0043687	31102433	chr16	31102374	-	hs|16p11.2	NM_206824	chr16:31102433-31102374	NM_206824	Hs.324844
A_24_P398940	2.21735	1.14884	2.21735	up	CASC4	cancer susceptibility candidate 4	FALSE	Homo sapiens cancer susceptibility candidate 4 (CASC4), transcript variant 1, mRNA [NM_138423]	113201	GO:0005794|GO:0016021	44707686	chr15	44707627	+	hs|15q15.3	NM_138423	chr15:44707627-44707686	NM_138423	Hs.512867
A_23_P41476	2.96292	1.56702	2.96292	up	SHISA3	shisa family member 3	FALSE	Homo sapiens shisa family member 3 (SHISA3), mRNA [NM_001080505]	152573	GO:0005789|GO:0007275|GO:0016021	42404240	chr4	42404181	+	hs|4p13	NM_001080505	chr4:42404181-42404240	NM_001080505	Hs.370904
A_23_P210176	2.02312	1.01659	2.02312	up	ITGA6	integrin, alpha 6	FALSE	Homo sapiens integrin, alpha 6 (ITGA6), transcript variant 2, mRNA [NM_000210]	3655	GO:0005515|GO:2001237|GO:0030056|GO:0033627|GO:0005886|GO:0097186|GO:0010811|GO:0030175|GO:0050900|GO:0046872|GO:0016337|GO:0009925|GO:0005913|GO:0030198|GO:0045944|GO:0031668|GO:0031581|GO:0046847|GO:0010668|GO:0043065|GO:0022409|GO:0009986|GO:0034329|GO:0031589|GO:0048565|GO:0034676|GO:0005604|GO:0071407|GO:0005178|GO:0007160|GO:0050873|GO:0007596|GO:0007229|GO:0043236|GO:0035878|GO:0007044|GO:…	173370615	chr2	173370556	+	hs|2q31.1	NM_000210	chr2:173370556-173370615	NM_000210	Hs.133397
A_24_P944458	2.26003	1.17634	2.26003	up	INSIG2	insulin induced gene 2	FALSE	Homo sapiens insulin induced gene 2 (INSIG2), mRNA [NM_016133]	51141	GO:0005515|GO:0006695|GO:0032868|GO:0042472|GO:0045717|GO:0044281|GO:0010894|GO:0070542|GO:0060363|GO:0032933|GO:0032937|GO:0005789|GO:0060021|GO:0006641|GO:0042474|GO:0008134	118867023	chr2	118866964	+	hs|2q14.2	NM_016133	chr2:118866964-118867023	NM_016133	Hs.7089
A_33_P3602006	2.7194	1.44329	2.7194	up	ADAT2	adenosine deaminase, tRNA-specific 2	FALSE	Homo sapiens adenosine deaminase, tRNA-specific 2 (ADAT2), transcript variant 2, mRNA [NM_001286259]	134637	GO:0008270|GO:0002100|GO:0008251	143748303	chr6	143748244	-	hs|6q24.2	NM_001286259	chr6:143748303-143748244	NM_001286259	Hs.709561
A_33_P3288023	4.45595	2.15573	4.45595	up	NCKIPSD	NCK interacting protein with SH3 domain	FALSE	Homo sapiens NCK interacting protein with SH3 domain (NCKIPSD), transcript variant 1, mRNA [NM_016453]	51517	GO:0008092|GO:0005882|GO:0005515|GO:0007165|GO:0017124|GO:0008180|GO:0045087|GO:0007010|GO:0038096|GO:0006607|GO:0005829	48716057	chr3	48715998	-	hs|3p21.31	NM_016453	chr3:48716057-48715998	NM_016453	Hs.655006
A_23_P165624	7.79171	2.96194	7.79171	up	TNFAIP6	tumor necrosis factor, alpha-induced protein 6	FALSE	Homo sapiens tumor necrosis factor, alpha-induced protein 6 (TNFAIP6), mRNA [NM_007115]	7130	GO:0007165|GO:0030335|GO:0006954|GO:0005540|GO:0007267|GO:0007155|GO:0005615|GO:0030728	152226654	chr2	152226595	+	hs|2q23.3	NM_007115	chr2:152226595-152226654	NM_007115	Hs.437322
A_23_P163455	2.97893	1.57479	2.97893	up	MAP1A	microtubule-associated protein 1A	FALSE	Homo sapiens microtubule-associated protein 1A (MAP1A), mRNA [NM_002373]	4130	GO:0008017|GO:0005515|GO:0005198|GO:0007605|GO:0005875|GO:0005874|GO:0000226|GO:0005829	43823211	chr15	43823152	+	hs|15q15.3	NM_002373	chr15:43823152-43823211	NM_002373	Hs.194301
A_23_P10911	2.48706	1.31444	2.48706	up	PLBD2	phospholipase B domain containing 2	FALSE	Homo sapiens phospholipase B domain containing 2 (PLBD2), transcript variant 1, mRNA [NM_173542]	196463	GO:0016042|GO:0016787|GO:0070062|GO:0043202	113827064	chr12	113827005	+	hs|12q24.13	NM_173542	chr12:113827005-113827064	NM_173542	Hs.115896
A_24_P253003	4.02289	2.00823	4.02289	up	WNT11	wingless-type MMTV integration site family, member 11	FALSE	Homo sapiens wingless-type MMTV integration site family, member 11 (WNT11), mRNA [NM_004626]	7481	GO:0030308|GO:0030325|GO:0044212|GO:0071300|GO:0048706|GO:0032915|GO:0061101|GO:0048844|GO:0030282|GO:0060675|GO:0005615|GO:0005109|GO:0005737|GO:0090037|GO:0070830|GO:0072177|GO:0030182|GO:0045860|GO:0060548|GO:0060021|GO:0031667|GO:0090090|GO:0060070|GO:0072201|GO:0030336|GO:0043066|GO:0030335|GO:0043065|GO:0060412|GO:0005578|GO:0090272|GO:0005576|GO:0030295|GO:0003151|GO:0001649|GO:0010628|GO:…	75897645	chr11	75897586	-	hs|11q13.5	NM_004626	chr11:75897645-75897586	NM_004626	Hs.108219
A_23_P23017	2.57647	1.3654	2.57647	up	C1orf123	chromosome 1 open reading frame 123	FALSE	Homo sapiens chromosome 1 open reading frame 123 (C1orf123), mRNA [NM_017887]	54987	GO:0008150|GO:0003674|GO:0070062	53680117	chr1	53680058	-	hs|1p32.3	NM_017887	chr1:53680117-53680058	NM_017887	Hs.525391
A_33_P3360684	2.19147	1.1319	2.19147	up	CORO1B	coronin, actin binding protein, 1B	FALSE	Homo sapiens coronin, actin binding protein, 1B (CORO1B), transcript variant 2, mRNA [NM_001018070]	57175	GO:0005515|GO:0090135|GO:0001725|GO:0035767|GO:0030036|GO:0005886|GO:2000394|GO:0005884|GO:0034316|GO:0071933|GO:0015629|GO:0030027|GO:0031529|GO:0042802|GO:0005737|GO:0051015|GO:0016477|GO:0042060|GO:0051017|GO:0005925|GO:0031252|GO:0070062	67208886	chr11	67208827	-	hs|11q13.2	NM_001018070	chr11:67208886-67208827	NM_001018070	Hs.6191
A_23_P312863	2.54403	1.34712	2.54403	up	TUBB4B	tubulin, beta 4B class IVb	FALSE	Homo sapiens tubulin, beta 4B class IVb (TUBB4B), mRNA [NM_006088]	10383	GO:0003725|GO:0051258|GO:0042288|GO:0006996|GO:0042267|GO:0005874|GO:0003924|GO:0006928|GO:0005634|GO:0005525|GO:0055085|GO:0051225|GO:0031982|GO:0005829|GO:0006184|GO:0006457|GO:0000086|GO:0005200|GO:0051084|GO:0051082|GO:0000278|GO:0005856|GO:0044267|GO:0070062	140137705	chr9	140137646	+	hs|9q34.3	NM_006088	chr9:140137646-140137705	NM_006088	Hs.433615
A_23_P10182	2.44081	1.28736	2.44081	up	ACOX2	acyl-CoA oxidase 2, branched chain	FALSE	Homo sapiens acyl-CoA oxidase 2, branched chain (ACOX2), mRNA [NM_003500]	8309	GO:0016402|GO:0005782|GO:0006699|GO:0033791|GO:0050660|GO:0005102|GO:0044281|GO:0003997|GO:0003995|GO:0008206|GO:0033540|GO:0044255|GO:0005777	58490967	chr3	58490908	-	hs|3p14.3	NM_003500	chr3:58490967-58490908	NM_003500	Hs.444959
A_21_P0011303	2.04374	1.03121	2.04374	up	PDCD6IPP2	PDCD6IP pseudogene 2	FALSE	Homo sapiens PDCD6IP pseudogene 2 (PDCD6IPP2), non-coding RNA [NR_037599]	646278		29037095	chr15	29035271	+	hs|15q13.1	NR_037599	chr15:29035271-29037095	NR_037599	Hs.590143
A_23_P122805	2.30245	1.20317	2.30245	up	TMEM209	transmembrane protein 209	FALSE	Homo sapiens transmembrane protein 209 (TMEM209), transcript variant 1, mRNA [NM_032842]	84928	GO:0016021	129805035	chr7	129804976	-	hs|7q32.2	NM_032842	chr7:129805035-129804976	NM_032842	Hs.267245
A_23_P407840	2.57619	1.36524	2.57619	up	FNDC1	fibronectin type III domain containing 1	FALSE	Homo sapiens fibronectin type III domain containing 1 (FNDC1), mRNA [NM_032532]	84624	GO:0031966|GO:0005886|GO:0005911|GO:0001934|GO:0071456|GO:0010666|GO:0005654|GO:0005576|GO:0051223	159692763	chr6	159692704	+	hs|6q25.3	NM_032532	chr6:159692704-159692763	NM_032532	Hs.520525
A_23_P21976	2.03519	1.02516	2.03519	up	CSPG4	chondroitin sulfate proteoglycan 4	FALSE	Homo sapiens chondroitin sulfate proteoglycan 4 (CSPG4), mRNA [NM_001897]	1464	GO:0048771|GO:0008347|GO:0008283|GO:0050731|GO:0044281|GO:0030208|GO:0035556|GO:0000187|GO:0030207|GO:0016324|GO:0030206|GO:0004871|GO:0030204|GO:0030203|GO:0070062|GO:0043202|GO:0009986|GO:0019901|GO:0031258|GO:0005975|GO:0005796|GO:0005576|GO:0001525|GO:0005887|GO:0009405|GO:0007169|GO:0005925	75967271	chr15	75967212	-	hs|15q24.2	NM_001897	chr15:75967271-75967212	NM_001897	Hs.513044
A_24_P250227	7.45754	2.8987	7.45754	up	NR1D1	nuclear receptor subfamily 1, group D, member 1	FALSE	Homo sapiens nuclear receptor subfamily 1, group D, member 1 (NR1D1), mRNA [NM_021724]	9572	GO:0005515|GO:2000189|GO:0034144|GO:0010467|GO:2000188|GO:0000790|GO:0006367|GO:0044212|GO:0045598|GO:0003707|GO:0035947|GO:0070859|GO:0005634|GO:0010871|GO:0060086|GO:0030154|GO:0030425|GO:0001222|GO:0005737|GO:0043197|GO:0043401|GO:0004879|GO:0001046|GO:0003714|GO:0005978|GO:0044321|GO:0000122|GO:0000978|GO:0032922|GO:0019216|GO:0001078|GO:0071222|GO:0042752|GO:0007623|GO:0005654|GO:0008270|GO:…	38251258	chr17	38251199	-	hs|17q21.1	NM_021724	chr17:38251258-38251199	NM_021724	Hs.592130
A_24_P296508	3.9108	1.96746	3.9108	up	SLC43A2	solute carrier family 43 (amino acid system L transporter), member 2	FALSE	Homo sapiens solute carrier family 43 (amino acid system L transporter), member 2 (SLC43A2), transcript variant 2, mRNA [NM_152346]	124935	GO:0005886|GO:0006865|GO:0016021|GO:0015179|GO:0055085|GO:0006811	1477761	chr17	1477702	-	hs|17p13.3	NM_152346	chr17:1477761-1477702	NM_152346	Hs.160550
A_23_P139682	4.69315	2.23056	4.69315	up	PZP	pregnancy-zone protein	FALSE	Homo sapiens pregnancy-zone protein (PZP), mRNA [NM_002864]	5858	GO:0010951|GO:0007565|GO:0004866|GO:0004867|GO:0072562|GO:0005576|GO:0070062	9304850	chr12	9304244	-	hs|12p13.31	NM_002864	chr12:9304850-9304244	NM_002864	Hs.707491
A_24_P141736	2.27615	1.1866	2.27615	up	METAP2	methionyl aminopeptidase 2	FALSE	Homo sapiens methionyl aminopeptidase 2 (METAP2), mRNA [NM_006838]	10988	GO:0070084|GO:0005886|GO:0007603|GO:0018206|GO:0022400|GO:0046872|GO:0005829|GO:0005737|GO:0016485|GO:0004177|GO:0070006|GO:0006508|GO:0008235|GO:0031365|GO:0016056	95909122	chr12	95909063	+	hs|12q22	NM_006838	chr12:95909063-95909122	NM_006838	Hs.444986
A_24_P255654	2.08243	1.05827	2.08243	up			FALSE				53548043	chr12	53547983	+	hs|12q13.13		chr12:53547983-53548043
A_33_P3337272	2.2383	1.1624	2.2383	up	NRARP	NOTCH-regulated ankyrin repeat protein	FALSE	Homo sapiens NOTCH-regulated ankyrin repeat protein (NRARP), mRNA [NM_001004354]	441478	GO:0045746|GO:0001569|GO:0032525|GO:0001938|GO:0090263|GO:0045581|GO:0002043|GO:0000122	140194182	chr9	140194123	-	hs|9q34.3	NM_001004354	chr9:140194182-140194123	NM_001004354	Hs.732282
A_33_P3338335	5.99607	2.58402	5.99607	up	MIDN	midnolin	FALSE	Homo sapiens midnolin (MIDN), mRNA [NM_177401]	90007	GO:0005730|GO:0033132|GO:0019900|GO:0046676|GO:0005829	1258955	chr19	1258896	+	hs|19p13.3	NM_177401	chr19:1258896-1258955	NM_177401	Hs.465529
A_23_P58293	2.57594	1.3651	2.57594	up	UBE2D3	ubiquitin-conjugating enzyme E2D 3	FALSE	Homo sapiens ubiquitin-conjugating enzyme E2D 3 (UBE2D3), transcript variant 2, mRNA [NM_181886]	7323	GO:0005515|GO:0006511|GO:0010467|GO:0004842|GO:0034142|GO:0006367|GO:0006513|GO:0016567|GO:0005886|GO:0016874|GO:0061418|GO:0005829|GO:0002756|GO:0007179|GO:0032480|GO:0034138|GO:0070062|GO:0000209|GO:0071456|GO:0006915|GO:0000122|GO:0030509|GO:0002224|GO:0005524|GO:0006351|GO:0006281|GO:0070979|GO:0045087|GO:0043161|GO:0035666|GO:0005654|GO:0070936|GO:0006464|GO:0010008	103722623	chr4	103720611	-	hs|4q24	NM_181886	chr4:103722623-103720611	NM_181886	Hs.518773
A_32_P150030	5.92442	2.56667	5.92442	up	PPM1D	protein phosphatase, Mg2+/Mn2+ dependent, 1D	FALSE	Homo sapiens protein phosphatase, Mg2+/Mn2+ dependent, 1D (PPM1D), mRNA [NM_003620]	8493	GO:0009314|GO:0005515|GO:0009617|GO:0035970|GO:0008285|GO:0006470|GO:0000086|GO:0005634|GO:0004722|GO:0046872	58741694	chr17	58741635	+	hs|17q23.2	NM_003620	chr17:58741635-58741694	NM_003620	Hs.286073
A_23_P355623	2.77571	1.47285	2.77571	up	ANKIB1	ankyrin repeat and IBR domain containing 1	FALSE	Homo sapiens ankyrin repeat and IBR domain containing 1 (ANKIB1), mRNA [NM_019004]	54467	GO:0005515|GO:0008270	92029829	chr7	92029770	+	hs|7q21.2	NM_019004	chr7:92029770-92029829	NM_019004	Hs.83293
A_23_P83818	2.54112	1.34546	2.54112	up	COL5A1	collagen, type V, alpha 1	FALSE	Homo sapiens collagen, type V, alpha 1 (COL5A1), transcript variant 1, mRNA [NM_000093]	1289	GO:0035313|GO:0048592|GO:0005588|GO:0035989|GO:0046872|GO:0022617|GO:0007411|GO:0030198|GO:0030199|GO:0030574|GO:0045112|GO:0043206|GO:0007155|GO:0008201|GO:0070062|GO:0001568|GO:0048407|GO:0043394|GO:0005576|GO:0005604|GO:0031012|GO:0003007|GO:0005178|GO:0016477|GO:0051128|GO:0005788|GO:0043588|GO:0032964|GO:0005201	137734122	chr9	137734063	+	hs|9q34.3	NM_000093	chr9:137734063-137734122	NM_000093	Hs.210283
A_23_P163408	2.47268	1.30608	2.47268	up	SCAPER	S-phase cyclin A-associated protein in the ER	FALSE	Homo sapiens S-phase cyclin A-associated protein in the ER (SCAPER), transcript variant 1, mRNA [NM_020843]	49855	GO:0005737|GO:0005783|GO:0005654|GO:0005634|GO:0046872	76640909	chr15	76640850	-	hs|15q24.3	NM_020843	chr15:76640909-76640850	NM_020843	Hs.458986
A_24_P376556	3.58328	1.84128	3.58328	up	CYCS	cytochrome c, somatic	FALSE	Homo sapiens cytochrome c, somatic (CYCS), mRNA [NM_018947]	54205	GO:0005515|GO:0070469|GO:0005743|GO:0000159|GO:0005634|GO:0044281|GO:0005829|GO:0005739|GO:0005758|GO:0045155|GO:0006123|GO:0006122|GO:0004722|GO:0044237|GO:0006996|GO:0008635|GO:0005506|GO:0006915|GO:0055085|GO:0097193|GO:0022904|GO:0045333|GO:0006309|GO:0016311|GO:0007005|GO:0000302|GO:0020037	25158296	chr7	25158264	-	hs|7p15.3	NM_018947	chr7:25158296-25158264	NM_018947	Hs.437060
A_24_P97405	15.758	3.97801	15.758	up	CCRL2	chemokine (C-C motif) receptor-like 2	FALSE	Homo sapiens chemokine (C-C motif) receptor-like 2 (CCRL2), transcript variant 1, mRNA [NM_003965]	9034	GO:0070098|GO:0006954|GO:0007186|GO:0006935|GO:0005886|GO:0005887|GO:0048020|GO:0004950|GO:0042379	46450261	chr3	46450202	+	hs|3p21.31	NM_003965	chr3:46450202-46450261	NM_003965	Hs.535713
A_23_P323751	3.24425	1.69788	3.24425	up	FAM83D	family with sequence similarity 83, member D	FALSE	Homo sapiens family with sequence similarity 83, member D (FAM83D), mRNA [NM_030919]	81610	GO:0007067|GO:0005737|GO:0000922|GO:0051301	37581385	chr20	37581326	+	hs|20q11.23	NM_030919	chr20:37581326-37581385	NM_030919	Hs.726442
A_24_P242820	2.0755	1.05346	2.0755	up	TSN	translin	FALSE	Homo sapiens translin (TSN), transcript variant 1, mRNA [NM_004622]	7247	GO:0043565|GO:0005515|GO:0010467|GO:0005737|GO:0003697|GO:0006310|GO:0005634|GO:0004521|GO:0003729|GO:0032403|GO:0003677|GO:0005829	122524553	chr2	122524494	+	hs|2q14.3	NM_004622	chr2:122524494-122524553	NM_004622	Hs.75066
A_32_P88905	3.30598	1.72508	3.30598	up			FALSE				49549271	chr13	49549212	-	hs|13q14.2		chr13:049549271-049549212
A_21_P0007590	11.7438	3.55383	11.7438	up			FALSE				77965967	chr12	77965908	+	hs|12q21.2	XM_006719676	chr12:77965908-77965967	XM_006719676
A_23_P368558	2.1136	1.07971	2.1136	up	TMEM131	transmembrane protein 131	FALSE	Homo sapiens transmembrane protein 131 (TMEM131), mRNA [NM_015348]	23505	GO:0008150|GO:0003674|GO:0016021|GO:0005575	98373333	chr2	98373274	-	hs|2q11.2	NM_015348	chr2:98373333-98373274	NM_015348	Hs.469376
A_19_P00808846	3.81734	1.93257	3.81734	up			FALSE				18003217	chr21	18003158	+	hs|21q21.1		chr21:18003158-18003217
A_33_P3339687	5.11534	2.35483	5.11534	up	ZNF669	zinc finger protein 669	FALSE	Homo sapiens zinc finger protein 669 (ZNF669), transcript variant 1, mRNA [NM_024804]	79862	GO:0006355|GO:0005634|GO:0003677|GO:0046872|GO:0006351	247264534	chr1	247264475	-	hs|1q44	NM_024804	chr1:247264534-247264475	NM_024804	Hs.163754
A_33_P3338733	2.63063	1.39541	2.63063	up	MITF	microphthalmia-associated transcription factor	FALSE	Homo sapiens microphthalmia-associated transcription factor (MITF), transcript variant 1, mRNA [NM_198159]	4286	GO:0005515|GO:0006355|GO:0006366|GO:0003705|GO:0030316|GO:0044336|GO:0030318|GO:0005634|GO:0045670|GO:0000122|GO:0000978|GO:0000979|GO:0001227|GO:0043234|GO:0001077|GO:0045165|GO:0006461|GO:0046849|GO:0045944|GO:0042127|GO:0003682|GO:0046983|GO:0043010|GO:0045893	70014774	chr3	70014715	+	hs|3p13	NM_198159	chr3:70014715-70014774	NM_198159	Hs.166017
A_33_P3349912	2.92027	1.5461	2.92027	up	RAB44	RAB44, member RAS oncogene family	FALSE	Homo sapiens RAB44, member RAS oncogene family (RAB44), mRNA [NM_001257357]	401258	GO:0006184|GO:0009306|GO:0005886|GO:0017157|GO:0003924|GO:0032482|GO:0019003|GO:0005525|GO:0006886|GO:0012505|GO:0006904	36700960	chr6	36700901	+	hs|6p21.2	NM_001257357	chr6:36700901-36700960	NM_001257357	Hs.485258
A_22_P00004878	2.74333	1.45593	2.74333	up			FALSE				10179831	chr2	10179772	-	hs|2p25.1		chr2:10179831-10179772
A_23_P425502	4.27148	2.09474	4.27148	up	DONSON	downstream neighbor of SON	FALSE	Homo sapiens downstream neighbor of SON (DONSON), mRNA [NM_017613]	29980	GO:0008150|GO:0003674|GO:0007275|GO:0005634|GO:0005575	34950584	chr21	34950525	-	hs|21q22.11	NM_017613	chr21:34950584-34950525	NM_017613	Hs.436341
A_21_P0014077	3.52763	1.8187	3.52763	up	LOC100505666	uncharacterized LOC100505666	FALSE	Homo sapiens uncharacterized LOC100505666 (LOC100505666), transcript variant 1, long non-coding RNA [NR_040772]	100505666		155017772	chr1	155017713	-	hs|1q22	NR_040772	chr1:155017772-155017713	NR_040772	Hs.657533
A_33_P3367830	2.10719	1.07532	2.10719	up	EFEMP2	EGF containing fibulin-like extracellular matrix protein 2	FALSE	Homo sapiens EGF containing fibulin-like extracellular matrix protein 2 (EFEMP2), transcript variant 1, mRNA [NM_016938]	30008	GO:0005515|GO:0007165|GO:0005886|GO:0030198|GO:0007596|GO:0005509|GO:0005576|GO:0031982|GO:0070062|GO:0005604|GO:0005201|GO:0004888	65633975	chr11	65633916	-	hs|11q13.1	NM_016938	chr11:65633975-65633916	NM_016938	Hs.731454
A_23_P113789	3.02759	1.59817	3.02759	up	USP19	ubiquitin specific peptidase 19	FALSE	Homo sapiens ubiquitin specific peptidase 19 (USP19), transcript variant 4, mRNA [NM_006677]	10869	GO:0005515|GO:0016579|GO:0034976|GO:0004843|GO:0030433|GO:0048642|GO:0046872|GO:0005829|GO:0090068|GO:0004197|GO:1900037|GO:0031647|GO:0061136|GO:0005789|GO:0016021	49148212	chr3	49148153	-	hs|3p21.31	NM_006677	chr3:49148212-49148153	NM_006677	Hs.255596
A_24_P876408	3.21239	1.68365	3.21239	up	C11orf95	chromosome 11 open reading frame 95	FALSE	Homo sapiens chromosome 11 open reading frame 95 (C11orf95), mRNA [NM_001144936]	65998		63527824	chr11	63527765	-	hs|11q13.1	NM_001144936	chr11:63527824-63527765	NM_001144936	Hs.191073
A_23_P423108	2.01628	1.0117	2.01628	up	TDRD10	tudor domain containing 10	FALSE	Homo sapiens tudor domain containing 10 (TDRD10), transcript variant 2, mRNA [NM_182499]	126668	GO:0000166|GO:0003723	154520441	chr1	154520382	+	hs|1q21.3	NM_182499	chr1:154520382-154520441	NM_182499	Hs.387671
A_23_P320113	2.20032	1.13771	2.20032	up	SRXN1	sulfiredoxin 1	FALSE	Homo sapiens sulfiredoxin 1 (SRXN1), mRNA [NM_080725]	140809	GO:0016667|GO:0032542|GO:0006979|GO:0005524|GO:0055114|GO:0005829	627622	chr20	627563	-	hs|20p13	NM_080725	chr20:627622-627563	NM_080725	Hs.516830
A_21_P0009248	3.28902	1.71766	3.28902	up	lnc-TMEM106A-1	lnc-TMEM106A-1:1	FALSE	LNCipedia lincRNA (lnc-TMEM106A-1), lincRNA [lnc-TMEM106A-1:1]			41393828	chr17	41393769	+	hs|17q21.31		chr17:41393769-41393828
A_23_P216894	3.85002	1.94487	3.85002	up	MAPKAP1	mitogen-activated protein kinase associated protein 1	FALSE	Homo sapiens mitogen-activated protein kinase associated protein 1 (MAPKAP1), transcript variant 1, mRNA [NM_001006617]	79109	GO:0005515|GO:0070300|GO:0005886|GO:0031295|GO:0005634|GO:0005829|GO:0046580|GO:0005737|GO:0007173|GO:0017016|GO:0048010|GO:0048011|GO:0005794|GO:0019901|GO:0043325|GO:0048015|GO:0005547|GO:0080025|GO:0005546|GO:0008543|GO:0021762|GO:0045087|GO:0016023|GO:0005654|GO:0038095	128200623	chr9	128200564	-	hs|9q33.3	NM_001006617	chr9:128200623-128200564	NM_001006617	Hs.495138
A_23_P76364	2.82937	1.50048	2.82937	up	CD9	CD9 molecule	FALSE	Homo sapiens CD9 molecule (CD9), mRNA [NM_001769]	928	GO:0005515|GO:0008285|GO:0005886|GO:0006928|GO:0005615|GO:0007338|GO:0016324|GO:0009414|GO:0031092|GO:0007155|GO:0070062|GO:0032504|GO:0030913|GO:0030168|GO:0031982|GO:0030666|GO:0005178|GO:0007596|GO:0007420|GO:0007342|GO:0005887|GO:0014003|GO:0002576|GO:0009405|GO:0005925|GO:0030669|GO:0009897	6344426	chr12	6342625	+	hs|12p13.31	NM_001769	chr12:6342625-6344426	NM_001769	Hs.114286
A_23_P258978	2.42048	1.27529	2.42048	up	GOLGA1	golgin A1	FALSE	Homo sapiens golgin A1 (GOLGA1), mRNA [NM_002077]	2800	GO:0005802|GO:0048471|GO:0005794|GO:0032580|GO:0043231|GO:0000042	127641177	chr9	127641118	-	hs|9q33.3	NM_002077	chr9:127641177-127641118	NM_002077	Hs.133469
A_24_P944049	2.82908	1.50033	2.82908	up	CEP68	centrosomal protein 68kDa	FALSE	Homo sapiens centrosomal protein 68kDa (CEP68), mRNA [NM_015147]	23177	GO:0051297|GO:0010457|GO:0005813|GO:0005737|GO:0030054|GO:0033365|GO:0019901|GO:0005815|GO:0019904|GO:0005654|GO:0005634	65313532	chr2	65313473	+	hs|2p14	NM_015147	chr2:65313473-65313532	NM_015147	Hs.709257
A_24_P299474	3.94387	1.97961	3.94387	up	TENM2	teneurin transmembrane protein 2	FALSE	Homo sapiens teneurin transmembrane protein 2 (TENM2), mRNA [NM_001122679]	57451	GO:0005515|GO:0043005|GO:0030054|GO:0035584|GO:0005886|GO:0005783|GO:0051491|GO:0045202|GO:0005634|GO:0030175|GO:0030425|GO:0042803|GO:0030426|GO:0016337|GO:0043197|GO:0007411|GO:0005911|GO:0045211|GO:0050839|GO:0007157|GO:0005794|GO:0046982|GO:0005102|GO:0000122|GO:0006351|GO:0007165|GO:0097264|GO:0005887|GO:0016605	167690122	chr5	167690063	+	hs|5q34	NM_001122679	chr5:167690063-167690122	NM_001122679	Hs.631957
A_33_P3300092	2.90594	1.539	2.90594	up	NDST1	N-deacetylase/N-sulfotransferase (heparan glucosaminyl) 1	FALSE	Homo sapiens N-deacetylase/N-sulfotransferase (heparan glucosaminyl) 1 (NDST1), transcript variant 1, mRNA [NM_001543]	3340	GO:0007585|GO:0005975|GO:0019213|GO:0048703|GO:0044281|GO:0015012|GO:0048702|GO:0006024|GO:0007224|GO:0015016|GO:0006954|GO:0000139|GO:0000165|GO:0008543|GO:0009405|GO:0030901|GO:0030900|GO:0016021|GO:0030203|GO:0030210|GO:0000271	149937773	chr5	149937714	+	hs|5q33.1	NM_001543	chr5:149937714-149937773	NM_001543	Hs.222055
A_23_P33894	2.3182	1.213	2.3182	up	MAGED2	melanoma antigen family D, 2	FALSE	Homo sapiens melanoma antigen family D, 2 (MAGED2), transcript variant 3, mRNA [NM_201222]	10916	GO:0016020	54838604	chrX	54838042	+	hs|Xp11.21	NM_201222	chrX:54838042-54838604	NM_201222	Hs.522665
A_21_P0000172	2.78743	1.47893	2.78743	up	CSPG5	chondroitin sulfate proteoglycan 5 (neuroglycan C)	FALSE	Homo sapiens chondroitin sulfate proteoglycan 5 (neuroglycan C) (CSPG5), transcript variant 5, mRNA [NM_001206945]	10675	GO:0005515|GO:0031103|GO:0005794|GO:0005796|GO:0005975|GO:0050804|GO:0046907|GO:0005576|GO:0044281|GO:0007399|GO:0030208|GO:0030207|GO:0030206|GO:0016020|GO:0005887|GO:0030660|GO:0005789|GO:0009405|GO:0016021|GO:0030204|GO:0008083|GO:0030203|GO:0040008|GO:0043202	47603865	chr3	47603806	-	hs|3p21.31	NM_001206945	chr3:47603865-47603806	NM_001206945	Hs.45127
A_24_P379165	2.1184	1.08297	2.1184	up	FOXO4	forkhead box O4	FALSE	Homo sapiens forkhead box O4 (FOXO4), transcript variant 1, mRNA [NM_005938]	4303	GO:0007095|GO:0005515|GO:0008286|GO:0003700|GO:0008285|GO:0006366|GO:0000981|GO:0005634|GO:0005829|GO:0005737|GO:0007173|GO:0007050|GO:0048011|GO:0006355|GO:0006357|GO:0051151|GO:0048015|GO:0070317|GO:0003677|GO:0048863|GO:0043565|GO:0007517|GO:0008543|GO:0045087|GO:0016525|GO:0005654|GO:0019899|GO:0045893|GO:0038095|GO:0008134	70322748	chrX	70322689	+	hs|Xq13.1	NM_005938	chrX:70322689-70322748	NM_005938	Hs.584654
A_23_P42087	2.03285	1.0235	2.03285	up	BPHL	biphenyl hydrolase-like (serine hydrolase)	FALSE	Homo sapiens biphenyl hydrolase-like (serine hydrolase) (BPHL), transcript variant 1, mRNA [NM_004332]	670	GO:0005739|GO:0006520|GO:0016787|GO:0009636|GO:0070062	3152907	chr6	3152848	+	hs|6p25.2	NM_004332	chr6:3152848-3152907	NM_004332	Hs.10136
A_23_P147918	2.20714	1.14218	2.20714	up	S100A16	S100 calcium binding protein A16	FALSE	Homo sapiens S100 calcium binding protein A16 (S100A16), mRNA [NM_080388]	140576	GO:0051592|GO:0005737|GO:0005886|GO:0005509|GO:0005730|GO:0042803|GO:0070062|GO:0005829	153579734	chr1	153579675	-	hs|1q21.3	NM_080388	chr1:153579734-153579675	NM_080388	Hs.515714
A_33_P3542801	2.73214	1.45003	2.73214	up	LOC729291	uncharacterized LOC729291	FALSE	PREDICTED: Homo sapiens uncharacterized LOC729291 (LOC729291), misc_RNA [XR_242943]	729291		28341327	chr12	28341268	-	hs|12p11.22	XR_242943	chr12:28341327-28341268	XR_242943	Hs.129278
A_19_P00315647	2.85973	1.51588	2.85973	up	LOC100507165	uncharacterized LOC100507165	FALSE	PREDICTED: Homo sapiens uncharacterized LOC100507165 (LOC100507165), ncRNA [XR_110530]	100507165		121899093	chr11	121899034	-	hs|11q24.1		chr11:121899093-121899034	XR_110530	Hs.728771
A_24_P942321	4.34789	2.12032	4.34789	up	FRMD4A	FERM domain containing 4A	FALSE	Homo sapiens FERM domain containing 4A (FRMD4A), mRNA [NM_018027]	55691	GO:0090162|GO:0005737|GO:0005923|GO:0030674|GO:0005856	13686415	chr10	13686356	-	hs|10p13	NM_018027	chr10:13686415-13686356	NM_018027	Hs.330463
A_22_P00005228	3.70346	1.88887	3.70346	up	SNHG23	small nucleolar RNA host gene 23 (non-protein coding)	FALSE	small nucleolar RNA host gene 23 (non-protein coding) [Source:HGNC Symbol;Acc:HGNC:50622] [ENST00000554369]	100507242		101424680	chr14	101424621	+	hs|14q32.31	XR_429410	chr14:101424621-101424680	XR_429410	Hs.709410
A_23_P80122	2.28611	1.19289	2.28611	up	WRB	tryptophan rich basic protein	FALSE	Homo sapiens tryptophan rich basic protein (WRB), transcript variant 1, mRNA [NM_004627]	7485	GO:0005789|GO:0005634|GO:0016021|GO:0071816	40768822	chr21	40765178	+	hs|21q22.2	NM_004627	chr21:40765178-40768822	NM_004627	Hs.744958
A_21_P0002437	2.11459	1.08038	2.11459	up	lnc-PIGF-3	lnc-PIGF-3:1	FALSE	LNCipedia lincRNA (lnc-PIGF-3), lincRNA [lnc-PIGF-3:1]			46726879	chr2	46726820	-	hs|2p21		chr2:46726879-46726820
A_23_P4036	2.27644	1.18678	2.27644	up	TEX2	testis expressed 2	FALSE	Homo sapiens testis expressed 2 (TEX2), transcript variant 1, mRNA [NM_018469]	55852	GO:0006665|GO:0007165|GO:0003674|GO:0016021	62225479	chr17	62225420	-	hs|17q23.3	NM_018469	chr17:62225479-62225420	NM_018469	Hs.175414
A_24_P23245	2.26025	1.17648	2.26025	up	NDUFA6	NADH dehydrogenase (ubiquinone) 1 alpha subcomplex, 6, 14kDa	FALSE	Homo sapiens NADH dehydrogenase (ubiquinone) 1 alpha subcomplex, 6, 14kDa (NDUFA6), mRNA [NM_002490]	4700	GO:0022904|GO:0031966|GO:0005747|GO:0006120|GO:0005743|GO:0044281|GO:0008137|GO:0006979|GO:0044237	42483077	chr22	42482273	-	hs|22q13.2	NM_002490	chr22:42483077-42482273	NM_002490	Hs.274416
A_24_P28657	2.28725	1.19361	2.28725	up	AHCTF1	AT hook containing transcription factor 1	FALSE	Homo sapiens AT hook containing transcription factor 1 (AHCTF1), mRNA [NM_015446]	25909	GO:0031965|GO:0006355|GO:0003700|GO:0005634|GO:0051292|GO:0015031|GO:0003677|GO:0016363|GO:0005829|GO:0000910|GO:0005643|GO:0031080|GO:0000777|GO:0005654|GO:0051028|GO:0000278|GO:0000785|GO:0070062	247003155	chr1	247003096	-	hs|1q44	NM_015446	chr1:247003155-247003096	NM_015446	Hs.300887
A_33_P3402600	2.55506	1.35336	2.55506	up			FALSE				102270044	chr4	102269985	+	hs|4q24		chr4:102269985-102270044
A_23_P41664	3.65262	1.86893	3.65262	up	LRRC70	leucine rich repeat containing 70	FALSE	Homo sapiens leucine rich repeat containing 70 (LRRC70), mRNA [NM_181506]	100130733	GO:0016021	61877109	chr5	61877050	+	hs|5q12.1	NM_181506	chr5:61877050-61877109	NM_181506	Hs.721348
A_23_P112801	2.05403	1.03846	2.05403	up	CHP1	calcineurin-like EF-hand protein 1	FALSE	Homo sapiens calcineurin-like EF-hand protein 1 (CHP1), mRNA [NM_007236]	11261	GO:0008017|GO:0005515|GO:0005215|GO:0032417|GO:0015459|GO:0031122|GO:0071468|GO:0051259|GO:0017156|GO:0006611|GO:0031397|GO:0060050|GO:0030203|GO:0070062|GO:0022406|GO:0005793|GO:0005975|GO:0005509|GO:0090314|GO:0070885|GO:0042308|GO:0051453|GO:0005925|GO:0048306|GO:0030133|GO:0005886|GO:0007264|GO:0005783|GO:0001578|GO:0005634|GO:0044281|GO:0005829|GO:0031953|GO:0005737|GO:0045056|GO:0010923|GO:…	41574038	chr15	41573979	+	hs|15q15.1	NM_007236	chr15:41573979-41574038	NM_007236	Hs.406234
A_33_P3262012	2.28344	1.19121	2.28344	up			FALSE	AY358403 RASL651 {Homo sapiens} (exp=-1; wgp=0; cg=0), partial (38%) [THC2603411]			220406302	chr2	220406243	-	hs|2q35		chr2:220406302-220406243
A_23_P406071	2.11475	1.08048	2.11475	up			FALSE	Homo sapiens cDNA FLJ39779 fis, clone SPLEN2001945. [AK097098]			69261996	chr14	69261937	-	hs|14q24.1	AK097098	chr14:69261996-69261937
A_32_P195647	3.39619	1.76392	3.39619	up	KLHL15	kelch-like family member 15	FALSE	Homo sapiens kelch-like family member 15 (KLHL15), mRNA [NM_030624]	80311	GO:0016567	24006653	chrX	24006594	-	hs|Xp22.11	NM_030624	chrX:24006653-24006594	NM_030624	Hs.495854
A_24_P134816	2.24342	1.1657	2.24342	up	BCL9L	B-cell CLL/lymphoma 9-like	FALSE	Homo sapiens B-cell CLL/lymphoma 9-like (BCL9L), mRNA [NM_182557]	283149	GO:0008013|GO:0003713|GO:0005730|GO:0010718|GO:0005634|GO:0035914|GO:0006351|GO:0045944|GO:0022604|GO:0005654|GO:0035019|GO:0060070|GO:0030512	118767694	chr11	118767635	-	hs|11q23.3	NM_182557	chr11:118767694-118767635	NM_182557	Hs.414740
A_23_P145965	3.50378	1.80891	3.50378	up	TPST1	tyrosylprotein sulfotransferase 1	FALSE	Homo sapiens tyrosylprotein sulfotransferase 1 (TPST1), mRNA [NM_003596]	8460	GO:0006954|GO:0016020|GO:0000139|GO:0016021|GO:0008476|GO:0006478	65825223	chr7	65825164	+	hs|7q11.21	NM_003596	chr7:65825164-65825223	NM_003596	Hs.421194
A_23_P101476	5.93644	2.5696	5.93644	up	ZNF442	zinc finger protein 442	FALSE	Homo sapiens zinc finger protein 442 (ZNF442), mRNA [NM_030824]	79973	GO:0006355|GO:0005634|GO:0003677|GO:0046872|GO:0006351	12460558	chr19	12460499	-	hs|19p13.2	NM_030824	chr19:12460558-12460499	NM_030824	Hs.253193
A_22_P00013165	2.16034	1.11126	2.16034	up	RNF125	ring finger protein 125, E3 ubiquitin protein ligase	FALSE	Homo sapiens ring finger protein 125, E3 ubiquitin protein ligase (RNF125), mRNA [NM_017831]	54941	GO:0004842|GO:0016567|GO:0045087|GO:0016874|GO:0008270|GO:0032480	29625690	chr18	29625631	+	hs|18q12.1	NM_017831	chr18:29625631-29625690	NM_017831	Hs.633703
A_23_P149470	2.29032	1.19555	2.29032	up	NDUFS2	NADH dehydrogenase (ubiquinone) Fe-S protein 2, 49kDa (NADH-coenzyme Q reductase)	FALSE	Homo sapiens NADH dehydrogenase (ubiquinone) Fe-S protein 2, 49kDa (NADH-coenzyme Q reductase) (NDUFS2), transcript variant 1, mRNA [NM_004550]	4720	GO:0005515|GO:0051539|GO:0048038|GO:0005743|GO:0009055|GO:0044281|GO:0046872|GO:0003954|GO:0005739|GO:0022904|GO:0051287|GO:0005747|GO:0006120|GO:0005654|GO:0008137|GO:0006979|GO:0044237	161180397	chr1	161180137	+	hs|1q23.3	NM_004550	chr1:161180137-161180397	NM_004550	Hs.173611
A_24_P173754	2.40558	1.26639	2.40558	up	C1orf21	chromosome 1 open reading frame 21	FALSE	Homo sapiens chromosome 1 open reading frame 21 (C1orf21), mRNA [NM_030806]	81563		184588664	chr1	184567549	+	hs|1q25.3	NM_030806	chr1:184567549-184588664	NM_030806	Hs.744936
A_21_P0014102	2.29183	1.1965	2.29183	up	LOC643072	uncharacterized LOC643072	FALSE	Homo sapiens uncharacterized LOC643072 (LOC643072), transcript variant 1, long non-coding RNA [NR_110587]	643072		160473562	chr2	160473503	+	hs|2q24.2	NR_110587	chr2:160473503-160473562	NR_110587	Hs.632541
A_24_P185709	2.87851	1.52532	2.87851	up	EPB41L1	erythrocyte membrane protein band 4.1-like 1	FALSE	Homo sapiens erythrocyte membrane protein band 4.1-like 1 (EPB41L1), transcript variant 1, mRNA [NM_012156]	2036	GO:0005886|GO:0030866|GO:0005198|GO:0007268|GO:0003779|GO:0005856|GO:0019898|GO:0005829	34820490	chr20	34820431	+	hs|20q11.23	NM_012156	chr20:34820431-34820490	NM_012156	Hs.437422
A_32_P32254	3.59388	1.84554	3.59388	up	COL6A1	collagen, type VI, alpha 1	FALSE	Homo sapiens collagen, type VI, alpha 1 (COL6A1), mRNA [NM_001848]	1291	GO:0048407|GO:0005578|GO:0005576|GO:0005589|GO:0035987|GO:0005765|GO:0001649|GO:0070208|GO:0042383|GO:0031012|GO:0043234|GO:0071230|GO:0016020|GO:0022617|GO:0007411|GO:0030198|GO:0030574|GO:0005788|GO:0007155|GO:0070062	47424895	chr21	47424836	+	hs|21q22.3	NM_001848	chr21:47424836-47424895	NM_001848	Hs.474053
A_33_P3461039	3.94911	1.98153	3.94911	up	lnc-MTERFD3-1	lnc-MTERFD3-1:1	FALSE	Homo sapiens cDNA FLJ31150 fis, clone IMR322001534. [AK055712]			107347872	chr12	107347813	-	hs|12q23.3	AK055712	chr12:107347872-107347813		Hs.129828
A_23_P407142	5.88779	2.55773	5.88779	up	LUZP1	leucine zipper protein 1	FALSE	Homo sapiens leucine zipper protein 1 (LUZP1), transcript variant 1, mRNA [NM_033631]	7798	GO:0021503|GO:0016020|GO:0005634|GO:0003281|GO:0060840|GO:0070062	23412495	chr1	23412436	-	hs|1p36.12	NM_033631	chr1:23412495-23412436	NM_033631	Hs.257900
A_23_P13359	2.15693	1.10898	2.15693	up	NXF1	nuclear RNA export factor 1	FALSE	Homo sapiens nuclear RNA export factor 1 (NXF1), transcript variant 1, mRNA [NM_006362]	10482	GO:0005515|GO:0010467|GO:0000346|GO:0003729|GO:0005829|GO:0006406|GO:0000166|GO:0005487|GO:0016607|GO:0005643|GO:0016973|GO:0016032|GO:0005654|GO:0042405	62562431	chr11	62561878	-	hs|11q12.3	NM_006362	chr11:62562431-62561878	NM_006362	Hs.523739
A_23_P65870	2.15055	1.1047	2.15055	up	FBXO22	F-box protein 22	FALSE	Homo sapiens F-box protein 22 (FBXO22), transcript variant 2, mRNA [NM_012170]	26263	GO:0000209|GO:0006511|GO:2000060|GO:0030018|GO:0004842|GO:0048742|GO:0032436|GO:0005634|GO:0006464|GO:0009267|GO:0006913	76222309	chr15	76222250	+	hs|15q24.2	NM_012170	chr15:76222250-76222309	NM_012170	Hs.591115
A_21_P0013806	2.4521	1.29402	2.4521	up	HADHB	hydroxyacyl-CoA dehydrogenase/3-ketoacyl-CoA thiolase/enoyl-CoA hydratase (trifunctional protein), beta subunit	FALSE	Homo sapiens hydroxyacyl-CoA dehydrogenase/3-ketoacyl-CoA thiolase/enoyl-CoA hydratase (trifunctional protein), beta subunit (HADHB), transcript variant 3, mRNA [NM_001281513]	3032	GO:0042645|GO:0005515|GO:0006635|GO:0005783|GO:0035965|GO:0005743|GO:0003857|GO:0005741|GO:0044281|GO:0005740|GO:0032403|GO:0005739|GO:0051287|GO:0016508|GO:0016509|GO:0016507|GO:0003988|GO:0004300|GO:0006644|GO:0000062|GO:0044255|GO:0070062|GO:0046474	26505713	chr2	26502925	+	hs|2p23.3	NM_001281513	chr2:26502925-26505713	NM_001281513	Hs.515848
A_23_P14673	9.93249	3.31216	9.93249	up	IGDCC4	immunoglobulin superfamily, DCC subclass, member 4	FALSE	Homo sapiens immunoglobulin superfamily, DCC subclass, member 4 (IGDCC4), mRNA [NM_020962]	57722	GO:0005886|GO:0016021	65674038	chr15	65673979	-	hs|15q22.31	NM_020962	chr15:65674038-65673979	NM_020962	Hs.458607
A_24_P370670	2.06016	1.04275	2.06016	up	ZMYM6NB	ZMYM6 neighbor	FALSE	Homo sapiens ZMYM6 neighbor (ZMYM6NB), mRNA [NM_001195156]	100506144	GO:0016021	35449497	chr1	35449438	-	hs|1p34.3	NM_001195156	chr1:35449497-35449438	NM_001195156	Hs.533986
A_33_P3398386	3.64379	1.86544	3.64379	up	ECM2	extracellular matrix protein 2, female organ and adipocyte specific	FALSE	Homo sapiens extracellular matrix protein 2, female organ and adipocyte specific (ECM2), transcript variant 3, mRNA [NM_001197296]	1842	GO:0005178|GO:0007160|GO:0030198|GO:0010811|GO:0005578|GO:0005614|GO:0008201|GO:0070052	95256034	chr9	95255975	-	hs|9q22.31	NM_001197296	chr9:95256034-95255975	NM_001197296	Hs.117060
A_23_P152356	3.00379	1.58678	3.00379	up	ZNF200	zinc finger protein 200	FALSE	Homo sapiens zinc finger protein 200 (ZNF200), transcript variant 1, mRNA [NM_003454]	7752	GO:0008150|GO:0003674|GO:0006355|GO:0005634|GO:0003676|GO:0046872|GO:0006351	3273438	chr16	3273379	-	hs|16p13.3	NM_003454	chr16:3273438-3273379	NM_003454	Hs.632222
A_23_P215744	2.09458	1.06666	2.09458	up	CTTNBP2	cortactin binding protein 2	FALSE	Homo sapiens cortactin binding protein 2 (CTTNBP2), mRNA [NM_033427]	83992	GO:0017124|GO:0043197|GO:0007420|GO:0005938|GO:0008021	117351142	chr7	117351083	-	hs|7q31.2	NM_033427	chr7:117351142-117351083	NM_033427	Hs.592285
A_33_P3297517	2.42742	1.27942	2.42742	up	TRA2B	transformer 2 beta homolog (Drosophila)	FALSE	Homo sapiens transformer 2 beta homolog (Drosophila) (TRA2B), transcript variant 2, mRNA [NM_001243879]	6434	GO:0048026|GO:0005515|GO:0000166|GO:0000398|GO:0000381|GO:0000375|GO:0005634|GO:0003729	185655716	chr3	185655657	-	hs|3q27.2	NM_001243879	chr3:185655716-185655657	NM_001243879	Hs.533122
A_24_P371758	2.05168	1.0368	2.05168	up	MRPL36	mitochondrial ribosomal protein L36	FALSE	Homo sapiens mitochondrial ribosomal protein L36 (MRPL36), mRNA [NM_032479]	64979	GO:0070124|GO:0070125|GO:0070126|GO:0032543|GO:0006996|GO:0003735|GO:0042254|GO:0005743|GO:0006412|GO:0005762	1798866	chr5	1798807	-	hs|5p15.33	NM_032479	chr5:1798866-1798807	NM_032479	Hs.719465
A_33_P3296777	2.35204	1.23391	2.35204	up	PSMF1	proteasome (prosome, macropain) inhibitor subunit 1 (PI31)	FALSE	Homo sapiens proteasome (prosome, macropain) inhibitor subunit 1 (PI31) (PSMF1), transcript variant 1, mRNA [NM_006814]	9491	GO:0005515|GO:0006511|GO:0002474|GO:0010467|GO:0004866|GO:0005783|GO:0090263|GO:0044281|GO:0031145|GO:0005829|GO:0034641|GO:0005737|GO:0000082|GO:0016032|GO:0090090|GO:0006977|GO:0000209|GO:0005839|GO:0043066|GO:0006521|GO:0051437|GO:0042590|GO:0006915|GO:0042981|GO:0051436|GO:0051439|GO:0010951|GO:0016020|GO:0070628|GO:0002479|GO:0005654|GO:0000278	1148426	chr20	1148367	+	hs|20p13	NM_006814	chr20:1148367-1148426	NM_006814	Hs.471917
A_24_P943815	2.79915	1.48499	2.79915	up	PNPLA4	patatin-like phospholipase domain containing 4	FALSE	Homo sapiens patatin-like phospholipase domain containing 4 (PNPLA4), transcript variant 1, mRNA [NM_004650]	8228	GO:0016042|GO:0008150|GO:0003674|GO:0004806|GO:0005575	7867118	chrX	7867059	-	hs|Xp22.31	NM_004650	chrX:7867118-7867059	NM_004650	Hs.264
A_33_P3410459	2.40114	1.26372	2.40114	up	SCARB2	scavenger receptor class B, member 2	FALSE	Homo sapiens scavenger receptor class B, member 2 (SCARB2), transcript variant 2, mRNA [NM_001204255]	950	GO:0005515|GO:0016020|GO:0006622|GO:0004872|GO:0016021|GO:0019899|GO:0007155|GO:0005765|GO:0005925|GO:0070062|GO:0043202	77079975	chr4	77079916	-	hs|4q21.1	NM_001204255	chr4:77079975-77079916	NM_001204255	Hs.349656
A_33_P3269388	2.9618	1.56648	2.9618	up	MBOAT7	membrane bound O-acyltransferase domain containing 7	FALSE	Homo sapiens membrane bound O-acyltransferase domain containing 7 (MBOAT7), transcript variant 4, mRNA [NM_001146082]	79143	GO:0005515|GO:0016020|GO:0036149|GO:0071617|GO:0021591|GO:0005789|GO:0044281|GO:0016021|GO:0021819|GO:0006644|GO:0046474	54682141	chr19	54682082	-	hs|19q13.42	NM_001146082	chr19:54682141-54682082	NM_001146082	Hs.467279
A_23_P418413	2.30025	1.20179	2.30025	up	OXSR1	oxidative stress responsive 1	FALSE	Homo sapiens oxidative stress responsive 1 (OXSR1), mRNA [NM_005109]	9943	GO:0005515|GO:0023014|GO:0000287|GO:0071476|GO:2000687|GO:0005524|GO:0035556|GO:0005737|GO:0004702|GO:0004674|GO:0018107|GO:0006468|GO:0006979|GO:0070062	38296787	chr3	38296728	+	hs|3p22.2	NM_005109	chr3:38296728-38296787	NM_005109	Hs.475970
A_23_P218237	2.26064	1.17673	2.26064	up	LCAT	lecithin-cholesterol acyltransferase	FALSE	Homo sapiens lecithin-cholesterol acyltransferase (LCAT), mRNA [NM_000229]	3931	GO:0042632|GO:0005515|GO:0043691|GO:0005576|GO:0044281|GO:0030301|GO:0005615|GO:0034372|GO:0004607|GO:0034364|GO:0034375|GO:0042157|GO:0034435|GO:0006644|GO:0034186|GO:0090107|GO:0070062|GO:0042158|GO:0006656|GO:0008203	67974230	chr16	67974171	-	hs|16q22.1	NM_000229	chr16:67974230-67974171	NM_000229	Hs.387239
A_23_P3042	2.15297	1.10633	2.15297	up	PPP2R5E	protein phosphatase 2, regulatory subunit B', epsilon isoform	FALSE	Homo sapiens protein phosphatase 2, regulatory subunit B', epsilon isoform (PPP2R5E), transcript variant 1, mRNA [NM_006246]	5529	GO:0005515|GO:0007165|GO:0050790|GO:0005737|GO:0008601|GO:0000159	63841631	chr14	63841572	-	hs|14q23.2	NM_006246	chr14:63841631-63841572	NM_006246	Hs.334868
A_33_P3393175	2.17981	1.12421	2.17981	up	CAPN7	calpain 7	FALSE	Homo sapiens calpain 7 (CAPN7), mRNA [NM_014296]	23473	GO:0005515|GO:0005737|GO:0004198|GO:0004175|GO:0097264|GO:0005654|GO:0010634|GO:0070062	15294381	chr3	15294322	+	hs|3p25.1	NM_014296	chr3:15294322-15294381	NM_014296	Hs.595234
A_33_P3290622	2.35185	1.2338	2.35185	up	PDZD11	PDZ domain containing 11	FALSE	Homo sapiens PDZ domain containing 11 (PDZD11), mRNA [NM_016484]	51248	GO:0005515|GO:0015939|GO:0006768|GO:0045202|GO:0006767|GO:0005576|GO:0044281|GO:0006887|GO:0008022|GO:0055085|GO:0045199|GO:0007269|GO:0005829|GO:0016323|GO:0034220|GO:0008105|GO:0005911|GO:0006766	69507134	chrX	69506916	-	hs|Xq13.1	NM_016484	chrX:69507134-69506916	NM_016484	Hs.11042
A_33_P3262376	3.35987	1.74841	3.35987	up	OTUD7A	OTU deubiquitinase 7A	FALSE	Homo sapiens OTU deubiquitinase 7A (OTUD7A), mRNA [NM_130901]	161725	GO:0005737|GO:0004843|GO:0006508|GO:0008270|GO:0005634|GO:0003677|GO:0035871	31775388	chr15	31775329	-	hs|15q13.3	NM_130901	chr15:31775388-31775329	NM_130901	Hs.355236
A_23_P12911	2.21394	1.14662	2.21394	up	C11orf24	chromosome 11 open reading frame 24	FALSE	Homo sapiens chromosome 11 open reading frame 24 (C11orf24), transcript variant 1, mRNA [NM_022338]	53838	GO:0005794|GO:0005886|GO:0016021	68029070	chr11	68029011	-	hs|11q13.2	NM_022338	chr11:68029070-68029011	NM_022338	Hs.303025
A_23_P15299	2.04589	1.03273	2.04589	up	WBP2	WW domain binding protein 2	FALSE	Homo sapiens WW domain binding protein 2 (WBP2), mRNA [NM_012478]	23558	GO:0005515|GO:0001105|GO:0000790|GO:0071442|GO:0045944|GO:0045815|GO:0071391|GO:0000979|GO:0031490|GO:0045184	73842721	chr17	73842662	-	hs|17q25.1	NM_012478	chr17:73842721-73842662	NM_012478	Hs.514489
A_23_P363878	2.49242	1.31755	2.49242	up	RFTN2	raftlin family member 2	FALSE	Homo sapiens raftlin family member 2 (RFTN2), mRNA [NM_144629]	130132	GO:0005886|GO:0043330|GO:0033227	198436123	chr2	198436064	-	hs|2q33.1	NM_144629	chr2:198436123-198436064	NM_144629	Hs.591615
A_24_P393372	2.07922	1.05604	2.07922	up	PACS2	phosphofurin acidic cluster sorting protein 2	FALSE	Homo sapiens phosphofurin acidic cluster sorting protein 2 (PACS2), transcript variant 1, mRNA [NM_001100913]	23241	GO:0005739|GO:0005783|GO:0072661|GO:0016032|GO:0006915|GO:0005788|GO:0000045|GO:0034497	105864431	chr14	105864372	+	hs|14q32.33	NM_001100913	chr14:105864372-105864431	NM_001100913	Hs.525626
A_33_P3400993	5.38009	2.42763	5.38009	up	LOC101929689	uncharacterized LOC101929689	FALSE	PREDICTED: Homo sapiens uncharacterized LOC101929689 (LOC101929689), ncRNA [XR_247063]	101929689		219608565	chr1	219608506	-	hs|1q41	XR_247063	chr1:219608565-219608506	XR_247063	Hs.735760
A_23_P51397	2.96915	1.57005	2.96915	up	ENAH	enabled homolog (Drosophila)	FALSE	Homo sapiens enabled homolog (Drosophila) (ENAH), transcript variant 1, mRNA [NM_001008493]	55740	GO:0005515|GO:0050852|GO:0001725|GO:0017124|GO:0030054|GO:0005886|GO:0050699|GO:0045202|GO:0001843|GO:0046907|GO:0003779|GO:0030175|GO:0030027|GO:0005829|GO:0005737|GO:0007411|GO:0008154|GO:0005925	225683355	chr1	225683296	-	hs|1q42.12	NM_001008493	chr1:225683355-225683296	NM_001008493	Hs.497893
A_33_P3622802	2.45887	1.29799	2.45887	up	ABI1	abl-interactor 1	FALSE	Homo sapiens abl-interactor 1 (ABI1), transcript variant 1, mRNA [NM_005470]	10006	GO:0008092|GO:0005515|GO:0031209|GO:0008285|GO:0030054|GO:0005783|GO:0061098|GO:0001756|GO:0006928|GO:0005634|GO:0030175|GO:0032403|GO:0005829|GO:0030426|GO:0005622|GO:0030296|GO:0045211|GO:0005856|GO:0070062|GO:0072673|GO:0048010|GO:0014069|GO:0018108|GO:0030027|GO:0035855|GO:0008154|GO:0045087|GO:0007169|GO:0038096	27036506	chr10	27036447	-	hs|10p12.1	NM_005470	chr10:27036506-27036447	NM_005470	Hs.508148
A_33_P3418170	2.30416	1.20424	2.30416	up	DDX58	DEAD (Asp-Glu-Ala-Asp) box polypeptide 58	FALSE	Homo sapiens DEAD (Asp-Glu-Ala-Asp) box polypeptide 58 (DDX58), mRNA [NM_014314]	23586	GO:0005515|GO:0003725|GO:0003727|GO:0015629|GO:0042993|GO:0005829|GO:0042802|GO:0051091|GO:0005737|GO:0003690|GO:0045944|GO:0009597|GO:0016032|GO:0032480|GO:0030334|GO:0032728|GO:0034344|GO:0032727|GO:0004386|GO:0032587|GO:0009615|GO:0005524|GO:0039529|GO:0045087|GO:0002230|GO:0039528|GO:0008152|GO:0008270|GO:0005923|GO:0043330	32455787	chr9	32455728	-	hs|9p21.1	NM_014314	chr9:32455787-32455728	NM_014314	Hs.190622
A_33_P3225096	2.21565	1.14773	2.21565	up	MTMR10	myotubularin related protein 10	FALSE	Homo sapiens myotubularin related protein 10 (MTMR10), mRNA [NM_017762]	54893	GO:0016791|GO:0016311	31233472	chr15	31233413	-	hs|15q13.3	NM_017762	chr15:31233472-31233413	NM_017762	Hs.30141
A_23_P388681	2.28746	1.19375	2.28746	up	ELAVL1	ELAV like RNA binding protein 1	FALSE	Homo sapiens ELAV like RNA binding protein 1 (ELAVL1), mRNA [NM_001419]	1994	GO:0003725|GO:0005515|GO:0010467|GO:0019901|GO:0003723|GO:0045727|GO:0005634|GO:0007275|GO:0003729|GO:0035925|GO:2000036|GO:0005829|GO:0005737|GO:0000166|GO:0016020|GO:0017091|GO:0005654|GO:0048255|GO:0003730|GO:0070935	8028338	chr19	8028279	-	hs|19p13.2	NM_001419	chr19:8028338-8028279	NM_001419	Hs.184492
A_21_P0011605	2.33198	1.22155	2.33198	up	AMZ2P1	archaelysin family metallopeptidase 2 pseudogene 1	FALSE	Homo sapiens archaelysin family metallopeptidase 2 pseudogene 1 (AMZ2P1), non-coding RNA [NR_026903]	201283		62969400	chr17	62969027	-	hs|17q24.1	NR_026903	chr17:62969400-62969027	NR_026903	Hs.396447
A_24_P17870	2.25266	1.17163	2.25266	up	HCP5	HLA complex P5 (non-protein coding)	FALSE	Homo sapiens HLA complex P5 (non-protein coding) (HCP5), long non-coding RNA [NR_040662]	10866	GO:0006952	31432704	chr6	31432645	+	hs|6p21.33	NR_040662	chr6:31432645-31432704	NR_040662	Hs.691948
A_32_P103669	2.08894	1.06277	2.08894	up	GOLGA6C	golgin A6 family, member C	FALSE	Homo sapiens golgin A6 family, member C (GOLGA6C), mRNA [NM_001164404]	653641	GO:0005794	75565661	chr15	75565602	+	hs|15q24.2	NM_001164404	chr15:75565602-75565661	NM_001164404	Hs.540230
A_24_P228667	2.0769	1.05443	2.0769	up	MRPL40	mitochondrial ribosomal protein L40	FALSE	Homo sapiens mitochondrial ribosomal protein L40 (MRPL40), mRNA [NM_003776]	64976	GO:0070124|GO:0005739|GO:0070125|GO:0070126|GO:0032543|GO:0006996|GO:0005761|GO:0005743|GO:0005730|GO:0005634|GO:0009653	19423174	chr22	19422372	+	hs|22q11.21	NM_003776	chr22:19422372-19423174	NM_003776	Hs.431307
A_23_P134395	2.42927	1.28052	2.42927	up	TBL2	transducin (beta)-like 2	FALSE	Homo sapiens transducin (beta)-like 2 (TBL2), mRNA [NM_012453]	26608	GO:0008150|GO:0005575	72984156	chr7	72984097	-	hs|7q11.23	NM_012453	chr7:72984156-72984097	NM_012453	Hs.647044
A_23_P391164	2.1177	1.0825	2.1177	up	ZNF512	zinc finger protein 512	FALSE	Homo sapiens zinc finger protein 512 (ZNF512), transcript variant 1, mRNA [NM_032434]	84450	GO:0006355|GO:0005654|GO:0005634|GO:0003677|GO:0046872|GO:0006351	27845426	chr2	27845367	+	hs|2p23.3	NM_032434	chr2:27845367-27845426	NM_032434	Hs.529178
A_23_P24555	2.28688	1.19338	2.28688	up	PHLDB1	pleckstrin homology-like domain, family B, member 1	FALSE	Homo sapiens pleckstrin homology-like domain, family B, member 1 (PHLDB1), transcript variant 1, mRNA [NM_015157]	23187		118527618	chr11	118527559	+	hs|11q23.3	NM_015157	chr11:118527559-118527618	NM_015157	Hs.504062
A_23_P41854	2.65265	1.40743	2.65265	up	CARD6	caspase recruitment domain family, member 6	FALSE	Homo sapiens caspase recruitment domain family, member 6 (CARD6), mRNA [NM_032587]	84674	GO:0006915|GO:0042981	40855404	chr5	40855345	+	hs|5p13.1	NM_032587	chr5:40855345-40855404	NM_032587	Hs.200242
A_24_P168398	2.29129	1.19616	2.29129	up	ZNF177	zinc finger protein 177	FALSE	Homo sapiens zinc finger protein 177 (ZNF177), transcript variant 3, mRNA [NM_003451]	7730	GO:0072562|GO:0005634|GO:0000122|GO:0003677|GO:0046872|GO:0006351	9492745	chr19	9492686	+	hs|19p13.2	NM_003451	chr19:9492686-9492745	NM_003451	Hs.728944
A_23_P213699	3.56136	1.83243	3.56136	up	NRG2	neuregulin 2	FALSE	Homo sapiens neuregulin 2 (NRG2), transcript variant 3, mRNA [NM_013982]	9542	GO:0048011|GO:0005886|GO:0048015|GO:0005102|GO:0005576|GO:0048513|GO:0009790|GO:0005615|GO:0035556|GO:0007165|GO:0007173|GO:0008543|GO:0045087|GO:0016021|GO:0008083|GO:0038095	139227327	chr5	139227268	-	hs|5q31.2	NM_013982	chr5:139227327-139227268	NM_013982	Hs.408515
A_24_P374319	3.06015	1.6136	3.06015	up	RAP2C	RAP2C, member of RAS oncogene family	FALSE	Homo sapiens RAP2C, member of RAS oncogene family (RAP2C), transcript variant 2, mRNA [NM_021183]	57826	GO:0030336|GO:0005886|GO:0032486|GO:0061097|GO:0030033|GO:0003713|GO:0044291|GO:0005525|GO:0005829|GO:0006184|GO:0005737|GO:0005923|GO:0019003|GO:0055038|GO:0070062|GO:0031954	131338037	chrX	131337978	-	hs|Xq26.2	NM_021183	chrX:131338037-131337978	NM_021183	Hs.119889
A_23_P148916	2.00817	1.00588	2.00817	up	OSBPL9	oxysterol binding protein-like 9	FALSE	Homo sapiens oxysterol binding protein-like 9 (OSBPL9), transcript variant 7, mRNA [NM_148909]	114883	GO:0005737|GO:0005794|GO:0031902|GO:0006869|GO:0008289	52253596	chr1	52253537	+	hs|1p32.3	NM_148909	chr1:52253537-52253596	NM_148909	Hs.21938
A_32_P213459	8.58197	3.10131	8.58197	up	DMRT2	doublesex and mab-3 related transcription factor 2	FALSE	Homo sapiens doublesex and mab-3 related transcription factor 2 (DMRT2), transcript variant 1, mRNA [NM_006557]	10655	GO:0000987|GO:0006355|GO:0003700|GO:0048706|GO:0005634|GO:0005575|GO:0014807|GO:0006351|GO:0042803|GO:0046872|GO:0003674|GO:0008150|GO:2000287	1057506	chr9	1057447	+	hs|9p24.3	NM_006557	chr9:1057447-1057506	NM_006557	Hs.59506
A_33_P3328445	2.94344	1.5575	2.94344	up	ALOX12-AS1	ALOX12 antisense RNA 1	FALSE	Homo sapiens cDNA FLJ90099 fis, clone HEMBA1006016. [AK074580]	100506713		6905420	chr17	6905361	-	hs|17p13.1	AK074580	chr17:6905420-6905361		Hs.422967
A_23_P3204	3.25244	1.70152	3.25244	up	MAPK6	mitogen-activated protein kinase 6	FALSE	Homo sapiens mitogen-activated protein kinase 6 (MAPK6), mRNA [NM_002748]	5597	GO:0005515|GO:0007165|GO:0007049|GO:0005737|GO:0046982|GO:0019901|GO:0004674|GO:0000165|GO:0006468|GO:0005634|GO:0005524|GO:0004707	52358114	chr15	52358055	+	hs|15q21.2	NM_002748	chr15:52358055-52358114	NM_002748	Hs.411847
A_24_P188071	2.0495	1.03527	2.0495	up	TUBA1C	tubulin, alpha 1c	FALSE	Homo sapiens tubulin, alpha 1c (TUBA1C), transcript variant 5, mRNA [NM_032704]	84790	GO:0005515|GO:0005881|GO:0051258|GO:0005874|GO:0003924|GO:0005634|GO:0005525|GO:0031982|GO:0006184|GO:0030705|GO:0005198|GO:0006457|GO:0005200|GO:0051084|GO:0007017|GO:0044267|GO:0051301	49667089	chr12	49667030	+	hs|12q13.12	NM_032704	chr12:49667030-49667089	NM_032704	Hs.652390
A_23_P256244	5.60352	2.48633	5.60352	up	OXR1	oxidation resistance 1	FALSE	oxidation resistance 1 [Source:HGNC Symbol;Acc:HGNC:15822] [ENST00000497705]	55074	GO:0005739|GO:0003674|GO:0043524|GO:0016491|GO:0007628|GO:0005730|GO:0071447|GO:0005575|GO:0006979|GO:0055114	107719589	chr8	107719530	+	hs|8q23.1	AK096148	chr8:107719530-107719589		Hs.701892
A_33_P3367692	5.11554	2.35489	5.11554	up	CFH	complement factor H	FALSE	Homo sapiens complement factor H (CFH), transcript variant 2, mRNA [NM_001014975]	3075	GO:0006957|GO:0005515|GO:0030449|GO:0006956|GO:0045087|GO:0072562|GO:0043395|GO:0005576|GO:0008201|GO:0005615|GO:0070062	196646778	chr1	196646719	+	hs|1q31.3	NM_001014975	chr1:196646719-196646778	NM_001014975	Hs.363396
A_33_P3359704	2.47548	1.30771	2.47548	up	ZNF703	zinc finger protein 703	FALSE	zinc finger protein 703 [Source:HGNC Symbol;Acc:HGNC:25883] [ENST00000331569]	80139	GO:0005515|GO:0006355|GO:0008284|GO:0030335|GO:0034333|GO:0010718|GO:0005634|GO:0034111|GO:0003676|GO:0046872|GO:0006351|GO:0016363|GO:0060828|GO:0043234|GO:0005737|GO:0060644|GO:0071392|GO:0070491|GO:0051726|GO:0017015|GO:0045892|GO:0033601	37556186	chr8	37556127	+	hs|8p11.23	AK024361	chr8:37556127-37556186		Hs.744591
A_23_P114057	2.82494	1.49822	2.82494	up	SEMA4C	sema domain, immunoglobulin domain (Ig), transmembrane domain (TM) and short cytoplasmic domain, (semaphorin) 4C	FALSE	Homo sapiens sema domain, immunoglobulin domain (Ig), transmembrane domain (TM) and short cytoplasmic domain, (semaphorin) 4C (SEMA4C), mRNA [NM_017789]	54910	GO:0021535|GO:0030054|GO:0001843|GO:0014069|GO:0021549|GO:0032874|GO:0005615|GO:0042692|GO:0045211|GO:0071526|GO:0004872|GO:0030672|GO:0016021	97525582	chr2	97525523	-	hs|2q11.2	NM_017789	chr2:97525582-97525523	NM_017789	Hs.516220
A_23_P17242	2.1941	1.13363	2.1941	up	ABHD1	abhydrolase domain containing 1	FALSE	Homo sapiens abhydrolase domain containing 1 (ABHD1), mRNA [NM_032604]	84696	GO:0052689|GO:0008150|GO:0003674|GO:0008152|GO:0016021	27353675	chr2	27353616	+	hs|2p23.3	NM_032604	chr2:27353616-27353675	NM_032604	Hs.375791
A_23_P63751	2.07756	1.05489	2.07756	up	PRDX3	peroxiredoxin 3	FALSE	Homo sapiens peroxiredoxin 3 (PRDX3), transcript variant 1, mRNA [NM_006793]	10935	GO:0005515|GO:0042542|GO:0008284|GO:0008785|GO:0008385|GO:0042802|GO:0005829|GO:0005739|GO:0005737|GO:0051092|GO:0018171|GO:0005759|GO:0032496|GO:0030099|GO:0043154|GO:0019900|GO:0042744|GO:0006979|GO:0043027|GO:0070062|GO:0033673|GO:0043066|GO:0019901|GO:0051881|GO:0001893|GO:0008379|GO:0008022|GO:0034614|GO:0007005|GO:0034599|GO:0000302|GO:0005769	120931976	chr10	120931917	-	hs|10q26.11	NM_006793	chr10:120931976-120931917	NM_006793	Hs.523302
A_23_P16992	2.28709	1.19352	2.28709	up	PKP4	plakophilin 4	FALSE	Homo sapiens plakophilin 4 (PKP4), transcript variant 1, mRNA [NM_003628]	8502	GO:0005515|GO:0030057|GO:0072686|GO:0048471|GO:0005886|GO:0032467|GO:0044291|GO:0007267|GO:0030496|GO:0014069|GO:0051233|GO:0030155|GO:0000922|GO:0005737|GO:0016337|GO:0032321|GO:0005911|GO:0007043|GO:0009898|GO:0005856	159537292	chr2	159537233	+	hs|2q24.1	NM_003628	chr2:159537233-159537292	NM_003628	Hs.407580
A_33_P3211520	2.07439	1.05269	2.07439	up	SNAP47	synaptosomal-associated protein, 47kDa	FALSE	Homo sapiens synaptosomal-associated protein, 47kDa (SNAP47), mRNA [NM_053052]	116841	GO:0005515|GO:0019905|GO:0048471|GO:0016082|GO:0005886|GO:0031201|GO:0060291|GO:0030425|GO:0012505|GO:0005484|GO:0031083|GO:0043025|GO:0031629	227947137	chr1	227947078	+	hs|1q42.13	NM_053052	chr1:227947078-227947137	NM_053052	Hs.325081
A_33_P3383326	2.23392	1.15957	2.23392	up	LPAR1	lysophosphatidic acid receptor 1	FALSE	Homo sapiens lysophosphatidic acid receptor 1 (LPAR1), transcript variant 2, mRNA [NM_057159]	1902	GO:0005515|GO:0005886|GO:0035025|GO:0030139|GO:0007202|GO:0071673|GO:0007204|GO:0001965|GO:0000187|GO:0005543|GO:0043197|GO:0043198|GO:0051482|GO:0043123|GO:0060999|GO:0043065|GO:0009986|GO:0004930|GO:0042552|GO:0071453|GO:0032060|GO:0030165|GO:0007186|GO:0005887|GO:0010977|GO:0070915	113636129	chr9	113636070	-	hs|9q31.3	NM_057159	chr9:113636129-113636070	NM_057159	Hs.126667
A_33_P3318966	6.31419	2.6586	6.31419	up	METTL20	methyltransferase like 20	FALSE	Homo sapiens methyltransferase like 20 (METTL20), transcript variant 1, mRNA [NM_173802]	254013	GO:0005759|GO:0006479|GO:0008276	31821863	chr12	31821804	+	hs|12p11.21	NM_173802	chr12:31821804-31821863	NM_173802	Hs.740628
A_32_P36235	2.80334	1.48715	2.80334	up	IER2	immediate early response 2	FALSE	Homo sapiens immediate early response 2 (IER2), mRNA [NM_004907]	9592	GO:0005737	13265645	chr19	13265586	+	hs|19p13.2	NM_004907	chr19:13265586-13265645	NM_004907	Hs.501629
A_23_P203023	5.25487	2.39365	5.25487	up	RDX	radixin	FALSE	Homo sapiens radixin (RDX), transcript variant 3, mRNA [NM_002906]	5962	GO:0005515|GO:0005886|GO:0030033|GO:0045177|GO:0032420|GO:0030315|GO:0045176|GO:0003779|GO:0030175|GO:0032154|GO:0001726|GO:0005615|GO:0030027|GO:0071944|GO:0051693|GO:0010628|GO:0051286|GO:0005737|GO:0061028|GO:0005856|GO:0005925|GO:0070062|GO:0019898	110100899	chr11	110100840	-	hs|11q22.3	NM_002906	chr11:110100899-110100840	NM_002906	Hs.263671
A_23_P60387	2.70867	1.43759	2.70867	up	NOTCH1	notch 1	FALSE	Homo sapiens notch 1 (NOTCH1), mRNA [NM_017617]	4851	GO:0005515|GO:0010467|GO:0007386|GO:0007220|GO:0001190|GO:0003700|GO:0006367|GO:0003180|GO:0003181|GO:0003184|GO:0010832|GO:0007409|GO:0007283|GO:0007221|GO:0007507|GO:0001947|GO:0007219|GO:0003241|GO:0009986|GO:0001708|GO:0003273|GO:0005509|GO:0003270|GO:0001047|GO:0000122|GO:0001701|GO:0001889|GO:0005789|GO:0005654|GO:0002437|GO:0008284|GO:0007368|GO:0003160|GO:0008285|GO:0005886|GO:0010812|GO:…	139389823	chr9	139389764	-	hs|9q34.3	NM_017617	chr9:139389823-139389764	NM_017617	Hs.495473
A_23_P47034	2.40399	1.26543	2.40399	up	HHEX	hematopoietically expressed homeobox	FALSE	Homo sapiens hematopoietically expressed homeobox (HHEX), mRNA [NM_002729]	3087	GO:0005515|GO:0034504|GO:0044212|GO:0030878|GO:0030154|GO:0042803|GO:0060431|GO:0010944|GO:0006406|GO:0032993|GO:0042127|GO:0022027|GO:0016055|GO:0071103|GO:0008301|GO:0000122|GO:0000978|GO:0001701|GO:0002573|GO:0061017|GO:0016973|GO:0061010|GO:0071837|GO:0017025|GO:0061011|GO:0045892|GO:0008134|GO:0030948|GO:0008283|GO:0045736|GO:0030177|GO:0043434|GO:0005634|GO:0009952|GO:0005737|GO:0035264|GO:…	94454917	chr10	94454858	+	hs|10q23.33	NM_002729	chr10:94454858-94454917	NM_002729	Hs.118651
A_23_P118150	3.99336	1.9976	3.99336	up	ARL6IP1	ADP-ribosylation factor-like 6 interacting protein 1	FALSE	Homo sapiens ADP-ribosylation factor-like 6 interacting protein 1 (ARL6IP1), mRNA [NM_015161]	23204	GO:0005515|GO:0005784|GO:0016020|GO:0006613|GO:0016021|GO:0005829	18803812	chr16	18803753	-	hs|16p12.3	NM_015161	chr16:18803812-18803753	NM_015161	Hs.634882
A_23_P206359	3.00108	1.58548	3.00108	up	CDH1	cadherin 1, type 1, E-cadherin (epithelial)	FALSE	Homo sapiens cadherin 1, type 1, E-cadherin (epithelial) (CDH1), mRNA [NM_004360]	999	GO:0060576|GO:0005515|GO:0005802|GO:0030054|GO:0008013|GO:0007605|GO:0050680|GO:0016342|GO:0042993|GO:2000008|GO:0031175|GO:0016339|GO:0016337|GO:0001948|GO:0070830|GO:0030198|GO:0051260|GO:0050839|GO:0070062|GO:0071285|GO:0022408|GO:0045295|GO:0009986|GO:0019903|GO:0034329|GO:0005509|GO:0019904|GO:0030506|GO:0009636|GO:0007416|GO:0045216|GO:0043281|GO:0050776|GO:0033561|GO:0009898|GO:0045893|GO:…	68869273	chr16	68869214	+	hs|16q22.1	NM_004360	chr16:68869214-68869273	NM_004360	Hs.461086
A_23_P168592	2.11303	1.07931	2.11303	up	CCDC126	coiled-coil domain containing 126	FALSE	Homo sapiens coiled-coil domain containing 126 (CCDC126), mRNA [NM_138771]	90693	GO:0030144|GO:0016020|GO:0005576|GO:0006487	23682778	chr7	23682719	+	hs|7p15.3	NM_138771	chr7:23682719-23682778	NM_138771	Hs.232296
A_23_P67618	2.34158	1.22748	2.34158	up	ZNF792	zinc finger protein 792	FALSE	Homo sapiens zinc finger protein 792 (ZNF792), mRNA [NM_175872]	126375	GO:0006355|GO:0005634|GO:0003677|GO:0046872|GO:0006351	35447841	chr19	35447782	-	hs|19q13.11	NM_175872	chr19:35447841-35447782	NM_175872	Hs.50405
A_33_P3307735	2.4041	1.2655	2.4041	up	OPHN1	oligophrenin 1	FALSE	Homo sapiens oligophrenin 1 (OPHN1), mRNA [NM_002547]	4983	GO:0051966|GO:0051056|GO:0030036|GO:0030054|GO:0007264|GO:0003779|GO:0048488|GO:0015629|GO:0005100|GO:0005829|GO:0007399|GO:0006930|GO:0007165|GO:0005543|GO:0043197|GO:0035255|GO:0032321|GO:0007411|GO:0030100|GO:0043195	67263344	chrX	67263285	-	hs|Xq12	NM_002547	chrX:67263344-67263285	NM_002547	Hs.128824
A_21_P0004933	2.84092	1.50636	2.84092	up	lnc-GJA1-3	lnc-GJA1-3:1	FALSE	LNCipedia lincRNA (lnc-GJA1-3), lincRNA [lnc-GJA1-3:1]			122243848	chr6	122243789	+	hs|6q22.31		chr6:122243789-122243848		Hs.695884
A_24_P53051	3.64944	1.86768	3.64944	up	LACTB	lactamase, beta	FALSE	Homo sapiens lactamase, beta (LACTB), transcript variant 2, mRNA [NM_171846]	114294	GO:0005739|GO:0005737|GO:0016787|GO:0008152	63421800	chr15	63421741	+	hs|15q22.2	NM_171846	chr15:63421741-63421800	NM_171846	Hs.410388
A_32_P34387	2.23457	1.16	2.23457	up	SPATA7	spermatogenesis associated 7	FALSE	Homo sapiens spermatogenesis associated 7 (SPATA7), transcript variant 1, mRNA [NM_018418]	55812	GO:0005515|GO:0005930|GO:0015630|GO:0032391|GO:0045494|GO:0007601|GO:0050896|GO:0036064	88904476	chr14	88904417	+	hs|14q31.3	NM_018418	chr14:88904417-88904476	NM_018418	Hs.525518
A_33_P3227225	3.18136	1.66965	3.18136	up			FALSE				132056513	chr2	132056454	-	hs|2q21.1		chr2:132056513-132056454
A_21_P0001626	2.22386	1.15306	2.22386	up	LOC101929689	uncharacterized LOC101929689	FALSE	PREDICTED: Homo sapiens uncharacterized LOC101929689 (LOC101929689), ncRNA [XR_247063]	101929689		219608677	chr1	219608618	-	hs|1q41	XR_247063	chr1:219608677-219608618	XR_247063	Hs.735760
A_23_P114670	3.65471	1.86976	3.65471	up	ARHGEF16	Rho guanine nucleotide exchange factor (GEF) 16	FALSE	Homo sapiens Rho guanine nucleotide exchange factor (GEF) 16 (ARHGEF16), mRNA [NM_014448]	27237	GO:0005515|GO:0030971|GO:0051056|GO:0048011|GO:0043065|GO:0007264|GO:0030165|GO:0032863|GO:0097190|GO:0032864|GO:0005829|GO:0060326|GO:0017048|GO:0005089|GO:0090004	3397538	chr1	3397479	+	hs|1p36.32	NM_014448	chr1:3397479-3397538	NM_014448	Hs.87435
A_23_P373927	3.06555	1.61614	3.06555	up	ERP44	endoplasmic reticulum protein 44	FALSE	endoplasmic reticulum protein 44 [Source:HGNC Symbol;Acc:HGNC:18311] [ENST00000262455]	23071	GO:0006986|GO:0005515|GO:0034976|GO:0009100|GO:0005793|GO:0009986|GO:0006457|GO:0005789|GO:0005788|GO:0003756|GO:0045454|GO:0070062	102741776	chr9	102741717	-	hs|9q31.1	AB011145	chr9:102741776-102741717		Hs.154023
A_23_P344988	2.10614	1.0746	2.10614	up	ICK	intestinal cell (MAK-like) kinase	FALSE	Homo sapiens intestinal cell (MAK-like) kinase (ICK), transcript variant 2, mRNA [NM_016513]	22858	GO:0005515|GO:0000287|GO:0005634|GO:0007275|GO:0005524|GO:0036064|GO:0005829|GO:0035556|GO:0042384|GO:0007165|GO:0042073|GO:0004674|GO:0051726|GO:0006468|GO:0004693	52866185	chr6	52866126	-	hs|6p12.2	NM_016513	chr6:52866185-52866126	NM_016513	Hs.417022
A_23_P219197	2.40336	1.26506	2.40336	up	RGS3	regulator of G-protein signaling 3	FALSE	Homo sapiens regulator of G-protein signaling 3 (RGS3), transcript variant 4, mRNA [NM_134427]	5998	GO:0043547|GO:0000188|GO:0005737|GO:0008277|GO:0005886|GO:0038032|GO:0005654|GO:0005829|GO:0005096	116359767	chr9	116359708	+	hs|9q32	NM_134427	chr9:116359708-116359767	NM_134427	Hs.494875
A_23_P64204	2.00413	1.00297	2.00413	up	ZW10	zw10 kinetochore protein	FALSE	Homo sapiens zw10 kinetochore protein (ZW10), mRNA [NM_004724]	9183	GO:0005828|GO:0005515|GO:0007093|GO:0005783|GO:0007096|GO:0034501|GO:0000132|GO:0005634|GO:0015031|GO:0005829|GO:0005737|GO:0007030|GO:0019237|GO:0006888|GO:0000922|GO:0000070|GO:0006461|GO:0007126|GO:0016020|GO:0005789|GO:0000777|GO:0000776|GO:0007080|GO:0000278|GO:0051301	113604384	chr11	113604325	-	hs|11q23.2	NM_004724	chr11:113604384-113604325	NM_004724	Hs.503886
A_33_P3209433	2.34047	1.2268	2.34047	up	RELA	v-rel avian reticuloendotheliosis viral oncogene homolog A	FALSE	Homo sapiens v-rel avian reticuloendotheliosis viral oncogene homolog A (RELA), transcript variant 1, mRNA [NM_021975]	5970	GO:0005515|GO:0003700|GO:0006366|GO:0003705|GO:0019221|GO:0033590|GO:0032403|GO:0002756|GO:0002755|GO:0009887|GO:0001942|GO:0031625|GO:0033256|GO:0032868|GO:0038124|GO:0038123|GO:0019901|GO:0034134|GO:0007568|GO:0001205|GO:0000122|GO:0000978|GO:0002224|GO:0038061|GO:0001889|GO:0032570|GO:0035666|GO:0034166|GO:0005654|GO:0000980|GO:0038095|GO:0034162|GO:0008134|GO:0008284|GO:0034142|GO:0031293|GO:…	65422045	chr11	65421986	-	hs|11q13.1	NM_021975	chr11:65422045-65421986	NM_021975	Hs.502875
A_33_P3211929	3.20357	1.67968	3.20357	up	RCOR2	REST corepressor 2	FALSE	Homo sapiens REST corepressor 2 (RCOR2), mRNA [NM_173587]	283248	GO:0005667|GO:0003700|GO:0003714|GO:0003682|GO:0005634|GO:0045892|GO:0003677|GO:0000785|GO:0006351	63678786	chr11	63678727	-	hs|11q13.1	NM_173587	chr11:63678786-63678727	NM_173587	Hs.98788
A_33_P3324786	2.22755	1.15546	2.22755	up	TCFL5	transcription factor-like 5 (basic helix-loop-helix)	FALSE	transcription factor-like 5 (basic helix-loop-helix) [Source:HGNC Symbol;Acc:HGNC:11646] [ENST00000217162]	10732	GO:0006355|GO:0003700|GO:0006366|GO:0042127|GO:0046983|GO:0045595|GO:0007275|GO:0005634|GO:0007283|GO:0001673|GO:0003677|GO:0030154	61477326	chr20	61477267	-	hs|20q13.33	XM_005260184	chr20:61477326-61477267	XM_005260184	Hs.126248
A_21_P0013697	3.11313	1.63837	3.11313	up	FAM27E3	family with sequence similarity 27, member E3	FALSE	Homo sapiens family with sequence similarity 27, member E3 (FAM27E3), long non-coding RNA [NR_103833]	100131997		67785177	chr9	67785118	-	hs|9q13		chr9:67785177-67785118	NR_103833	Hs.31240
A_23_P82775	4.05112	2.01832	4.05112	up	SOX17	SRY (sex determining region Y)-box 17	FALSE	Homo sapiens SRY (sex determining region Y)-box 17 (SOX17), mRNA [NM_022454]	64321	GO:0005515|GO:0030308|GO:0008013|GO:0044212|GO:0003705|GO:0045597|GO:0007283|GO:0060913|GO:0001947|GO:0003143|GO:0003308|GO:0003142|GO:0042074|GO:0060914|GO:0061009|GO:0060956|GO:0042789|GO:0001706|GO:0046982|GO:0023019|GO:0003713|GO:0000122|GO:0048643|GO:2000035|GO:2000043|GO:0072091|GO:0061010|GO:0072001|GO:0045893|GO:0008134|GO:0045732|GO:0042662|GO:0005634|GO:0048866|GO:0031648|GO:0045944|GO:…	55372850	chr8	55372791	+	hs|8q11.23	NM_022454	chr8:55372791-55372850	NM_022454	Hs.98367
A_21_P0000631	2.45624	1.29645	2.45624	up	LOC643733	caspase 4, apoptosis-related cysteine peptidase pseudogene	FALSE	Homo sapiens caspase 4, apoptosis-related cysteine peptidase pseudogene (LOC643733), transcript variant 2, non-coding RNA [NR_034079]	643733		104774165	chr11	104772372	-	hs|11q22.3	NR_034079	chr11:104774165-104772372	NR_034079	Hs.713751
A_33_P3316786	3.951	1.98222	3.951	up	DACH1	dachshund family transcription factor 1	FALSE	Homo sapiens dachshund family transcription factor 1 (DACH1), transcript variant 1, mRNA [NM_080759]	1602	GO:0046545|GO:0005515|GO:0005667|GO:0030336|GO:0007585|GO:0008283|GO:0060244|GO:0048147|GO:0005730|GO:0005634|GO:0000122|GO:0003677|GO:0043231|GO:0001078|GO:0005737|GO:0010944|GO:0001967|GO:0001075|GO:0005654|GO:0051123	72049898	chr13	72049839	-	hs|13q21.33	NM_080759	chr13:72049898-72049839	NM_080759	Hs.129452
A_32_P74366	2.76285	1.46616	2.76285	up	VCPIP1	valosin containing protein (p97)/p47 complex interacting protein 1	FALSE	valosin containing protein (p97)/p47 complex interacting protein 1 [Source:HGNC Symbol;Acc:HGNC:30897] [ENST00000310421]	80124	GO:0071108|GO:0007067|GO:0005737|GO:0016567|GO:0004843|GO:0005795|GO:0005783|GO:0016320|GO:0006508|GO:0090168|GO:0035871	67540976	chr8	67540917	-	hs|8q13.1	AF088033	chr8:67540976-67540917		Hs.732745
A_24_P391586	2.61542	1.38704	2.61542	up	OAF	OAF homolog (Drosophila)	FALSE	Homo sapiens OAF homolog (Drosophila) (OAF), mRNA [NM_178507]	220323	GO:0070062	120100232	chr11	120100173	+	hs|11q23.3	NM_178507	chr11:120100173-120100232	NM_178507	Hs.445081
A_32_P411592	2.05777	1.04108	2.05777	up	MBD6	methyl-CpG binding domain protein 6	FALSE	Homo sapiens methyl-CpG binding domain protein 6 (MBD6), mRNA [NM_052897]	114785	GO:0010369|GO:0003682|GO:0005730|GO:0005654|GO:0005634|GO:0003677	57923631	chr12	57923572	+	hs|12q13.3	NM_052897	chr12:57923572-57923631	NM_052897	Hs.524523
A_24_P306594	2.07545	1.05343	2.07545	up	C1orf167	chromosome 1 open reading frame 167	FALSE	Homo sapiens chromosome 1 open reading frame 167 (C1orf167), mRNA [NM_001010881]	284498		11849535	chr1	11849476	+	hs|1p36.22	NM_001010881	chr1:11849476-11849535	NM_001010881	Hs.585415
A_33_P3220837	2.44482	1.28973	2.44482	up	MAFB	v-maf avian musculoaponeurotic fibrosarcoma oncogene homolog B	FALSE	Homo sapiens v-maf avian musculoaponeurotic fibrosarcoma oncogene homolog B (MAFB), mRNA [NM_005461]	9935	GO:0005515|GO:0005667|GO:0033077|GO:0042472|GO:0003700|GO:0007379|GO:0007585|GO:0048538|GO:0005634|GO:0006351|GO:0043565|GO:0007423|GO:0021572|GO:0021571|GO:0045647|GO:0045944|GO:0035284|GO:0008134	39315666	chr20	39315607	-	hs|20q12	NM_005461	chr20:39315666-39315607	NM_005461	Hs.169487
A_24_P406006	2.01221	1.00878	2.01221	up	LPCAT1	lysophosphatidylcholine acyltransferase 1	FALSE	Homo sapiens lysophosphatidylcholine acyltransferase 1 (LPCAT1), mRNA [NM_024830]	79888	GO:0045732|GO:0047184|GO:0060041|GO:0005783|GO:0044281|GO:0019432|GO:0043129|GO:0006654|GO:0044255|GO:0047159|GO:0005811|GO:0005794|GO:0036148|GO:0005509|GO:2001246|GO:0008654|GO:0047191|GO:0047192|GO:0016020|GO:0000139|GO:0005789|GO:0016021|GO:0006644|GO:0036151|GO:0046474	1462269	chr5	1462210	-	hs|5p15.33	NM_024830	chr5:1462269-1462210	NM_024830	Hs.368853
A_32_P231617	3.62323	1.85728	3.62323	up	TM4SF1	transmembrane 4 L six family member 1	FALSE	Homo sapiens transmembrane 4 L six family member 1 (TM4SF1), mRNA [NM_014220]	4071	GO:0008150|GO:0003674|GO:0005887	149093493	chr3	149093343	-	hs|3q25.1	NM_014220	chr3:149093493-149093343	NM_014220	Hs.351316
A_32_P96807	2.13431	1.09377	2.13431	up	RC3H1	ring finger and CCCH-type domains 1	FALSE	Homo sapiens ring finger and CCCH-type domains 1 (RC3H1), transcript variant 1, mRNA [NM_001300850]	149041	GO:0043488|GO:0001782|GO:0016567|GO:0033962|GO:0050856|GO:0010494|GO:0046007|GO:0000956|GO:0030889|GO:0048536|GO:0048535|GO:0010608|GO:0042098|GO:0000932|GO:0002635|GO:0008270|GO:0045623|GO:0003730|GO:0043029|GO:0002634	173900682	chr1	173900623	-	hs|1q25.1	NM_001300850	chr1:173900682-173900623	NM_001300850	Hs.30258
A_33_P3272165	2.07127	1.05051	2.07127	up	NDUFAF6	NADH dehydrogenase (ubiquinone) complex I, assembly factor 6	FALSE	Homo sapiens NADH dehydrogenase (ubiquinone) complex I, assembly factor 6 (NDUFAF6), mRNA [NM_152416]	137682	GO:0032981|GO:0005737|GO:0009058|GO:0005743|GO:0005634|GO:0016740	96070129	chr8	96070070	+	hs|8q22.1	NM_152416	chr8:96070070-96070129	NM_152416	Hs.729144
A_23_P62642	2.20344	1.13976	2.20344	up	CFAP45	cilia and flagella associated protein 45	FALSE	Homo sapiens cilia and flagella associated protein 45 (CFAP45), mRNA [NM_012337]	25790	GO:0005739|GO:0005654|GO:0005634	159846444	chr1	159846385	-	hs|1q23.2	NM_012337	chr1:159846444-159846385	NM_012337	Hs.647705
A_23_P254816	3.92732	1.97355	3.92732	up	TCF15	transcription factor 15 (basic helix-loop-helix)	FALSE	Homo sapiens transcription factor 15 (basic helix-loop-helix) (TCF15), mRNA [NM_004609]	6939	GO:0048339|GO:0003700|GO:0006357|GO:0001756|GO:0060231|GO:0016265|GO:0048705|GO:0005634|GO:0003677|GO:0006351|GO:0045198|GO:0043583|GO:0048644|GO:0003016|GO:0050884|GO:0046983|GO:0007498|GO:0042755|GO:0043588	585004	chr20	584945	-	hs|20p13	NM_004609	chr20:585004-584945	NM_004609	Hs.437
A_23_P121499	2.07447	1.05274	2.07447	up	WFS1	Wolfram syndrome 1 (wolframin)	FALSE	Homo sapiens Wolfram syndrome 1 (wolframin) (WFS1), transcript variant 1, mRNA [NM_006005]	7466	GO:0005516|GO:0005215|GO:0034976|GO:0006983|GO:0051928|GO:0005783|GO:0007605|GO:0030176|GO:0030425|GO:0043433|GO:2000675|GO:0055074|GO:0022417|GO:0030968|GO:0043069|GO:0043524|GO:0042048|GO:0031398|GO:0051117|GO:0033613|GO:0031625|GO:0045927|GO:0051247|GO:0001822|GO:0032469|GO:0050821|GO:0042593|GO:0030433|GO:0045862|GO:0003091|GO:0070845|GO:0005789|GO:0050877|GO:0006987|GO:0044267|GO:0007601|GO:…	6304494	chr4	6304435	+	hs|4p16.1	NM_006005	chr4:6304435-6304494	NM_006005	Hs.518602
[truncated: 7,328 more rows]
